# Supplementary material for: Multi-region proteome analysis quantifies spatial heterogeneity of prostate tissue biomarkers
Source: Life Sci Alliance. 2018 May 29;1(2):e201800042. doi: 10.26508/lsa.201800042 (PMC6078179; doi:10.26508/lsa.201800042)
Supplement: Supplementary file 2 [file LSA-2018-00042_TableS2.xlsx]

## Sheet: Sheet1
Sample	batch1	batch2	batch3	batch4	batch5	batch6	batch7	batch8	batch9	batch10
1	P1N1a	P2N2a	P1N3a	P3N4a	P3D4a	P1N1b	P2N2b	P1N3b	P3N4b	P3D4b
2	P1N2a	P2N3a	P1A2a	P3N5a	P3D5a	P1N2b	P2N3b	P1A2b	P3N5b	P3D5b
3	P1A1a	P2A3a	P1A3a	P3N6a	P3D6a	P1A1b	P2A3b	P1A3b	P3N6b	P3D6b
4	P2A1a	P3A1a	P3N2a	P3D1a	P3A4a	P2A1b	P3A1b	P3N2b	P3D1b	P3A4b
5	P2A2a	P3A2a	P3N3a	P3D2a	P3A5a	P2A2b	P3A2b	P3N3b	P3D2b	P3A5b
6	P2N1a	P3N1a	P3A3a	P3D3a	P3A6a	P2N1b	P3N1b	P3A3b	P3D3b	P3A6b
