# Supplementary material for: Multi-region proteome analysis quantifies spatial heterogeneity of prostate tissue biomarkers
Source: Life Sci Alliance. 2018 May 29;1(2):e201800042. doi: 10.26508/lsa.201800042 (PMC6078179; doi:10.26508/lsa.201800042)
Supplement: Supplementary file 4 [file LSA-2018-00042_TableS4.xlsx]

## Sheet: proteins
UniProt_ID	Protein names	Gene symbol	Gene names	Protein length	Number of peptides	PCV1	PCV2	PCV3	PCV4	PCV5	PCV6	PCV7	PCV8	PCV9	PCV10	PCV11	PCV12	PCV13	PCV14	PCV15	PCV16	PCV17	PCV18	PCV19	PCV20	PCV21	PCV22	PCV23	PCV24	PCV25	PCV26	PCV27	PCV28	PCV29	PCV30	PCV31	PCV32	PCV33	PCV34	PCV35	PCV36	PCV37	PCV38	PCV39	PCV40	PCV41	PCV42	PCV43	PCV44
A0AV96	RNA-binding protein 47 (RNA-binding motif protein 47)	RBM47	RBM47	593	6	67248	42856.6	73812.4	121835	73179.9	106912	61443.5	69663.4	38986.3	61714.9	73290.6	89333.1	49737.8	118240	59516.8	61110.7	96378.8	63814.4	143081	80828.7	151695	88926.2	96151.8	80664.4	84501.5	113224	148373	73898.5	97980.1	82540.8	42271.2	42267.8	82111.1	68215.7	57314	73130.2	43622.5	39754.3	42632.9	54367.7	20055.7	56169.5	61147.3	69498.9
A0AVT1	Ubiquitin-like modifier-activating enzyme 6 (Ubiquitin-activating enzyme 6) (EC 6.2.1.45) (Monocyte protein 4) (MOP-4) (Ubiquitin-activating enzyme E1-like protein 2) (E1-L2)	UBA6	UBA6 MOP4 UBE1L2	1052	5	213421	224445	299610	340090	214893	299846	296374	371133	237902	237563	277517	326007	330148	350137	362149	220995	234382	252431	259751	368350	300091	231926	247683	331130	297054	273356	405564	240190	323947	237421	209155	263517	272347	310162	282670	265477	239802	260152	261868	209533	134496	233409	332460	282759
A0FGR8	Extended synaptotagmin-2 (E-Syt2) (Chr2Syt)	ESYT2	ESYT2 FAM62B KIAA1228	921	3	477253	453148	484684	880131	527495	769568	807728	731538	547633	372583	598739	754900	446289	784670	676703	630782	627649	482306	840651	831670	763112	592889	809962	721697	575246	602301	815454	608985	523887	650888	430258	403821	487714	820723	622232	588291	671733	685629	518398	275931	287260	491709	388004	725714
A0MZ66	Shootin-1 (Shootin1)	SHTN1	SHTN1 KIAA1598	631	4	103453	91098.5	124305	95118.1	91987.5	152465	116774	103112	100701	125845	155219	152739	97071.8	162304	95443.2	77237.9	101018	65455.6	109293	101373	180443	127434	74882.8	141631	105312	131082	160552	72144.9	122962	104400	91928.3	95901.7	141593	111625	120313	110015	86918.4	111469	143877	113938	71971.6	113078	119364	139865
A1A5D9	BICD family-like cargo adapter 2 (Bicaudal D-related protein 2) (BICD-related protein 2) (BICDR-2) (Coiled-coil domain-containing protein 64B)	BICDL2	BICDL2 BICDR2 CCDC64B	508	2	474974	782480	836543	628560	572749	383391	771083	912498	697247	690260	755280	669461	886000	430917	137566	285449	443726	615886	437720	797852	446424	372264	386096	570140	600496	533022	798068	544792	565030	447630	410036	765995	645282	589922	500339	540877	695381	802167	673699	599748	415176	622053	911538	368379
A1L0T0	Acetolactate synthase-like protein (EC 2.2.1.-) (IlvB-like protein)	ILVBL	ILVBL AHAS	632	2	249151	197464	221992	377319	275106	406612	277460	326651	221429	229402	314247	284639	207994	333879	345930	232776	247734	199346	329107	303880	413859	310289	298898	284972	261485	301497	345328	272857	302600	282527	228082	218247	269135	366059	371408	403613	287184	229825	236224	233171	145956	237565	247664	282603
A2RUS2	DENN domain-containing protein 3	DENND3	DENND3 KIAA0870	1198	2	440645	503982	309479	425453	421307	490056	539173	628246	435172	542902	346498	459052	569873	673619	653672	595776	551030	430034	411003	419271	570340	402499	285539	464614	340273	408722	536455	300292	422739	286305	675887	322048	499970	513834	498896	497203	398858	458010	337593	486077	194783	324920	314801	549530
A3KMH1	von Willebrand factor A domain-containing protein 8	VWA8	VWA8 KIAA0564	1905	3	250189	197491	154198	254083	206956	265640	123775	193968	132094	229942	238916	190724	173333	252422	285722	187351	181764	144482	414078	195534	248895	316064	191417	227298	344421	222853	247132	160539	248952	184749	201891	160281	296851	237156	272918	263318	178981	134877	154377	215089	132307	134299	127259	170673
A5A3E0	POTE ankyrin domain family member F (ANKRD26-like family C member 1B) (Chimeric POTE-actin protein)	POTEF	POTEF A26C1B	1075	2	385756	400798	912370	1.02723e+06	399821	905902	674955	1.03631e+06	673646	693500	885446	709447	601791	779674	912676	700385	958557	594748	1.03841e+06	1.31645e+06	750514	1.12932e+06	722462	1.16976e+06	652436	774977	896623	668779	939013	438633	280270	871930	798428	500591	514823	757164	625754	629598	680098	497311	144054	351005	537308	750395
A5YKK6	CCR4-NOT transcription complex subunit 1 (CCR4-associated factor 1) (Negative regulator of transcription subunit 1 homolog) (NOT1H) (hNOT1)	CNOT1	CNOT1 CDC39 KIAA1007 NOT1 AD-005	2376	4	568695	1.05084e+06	1.17862e+06	520606	455364	575317	1.06714e+06	1.07465e+06	923669	837773	868572	726066	1.1359e+06	685759	850445	501172	698996	689277	600671	1.23348e+06	668208	538582	534354	809703	857619	673759	1.14314e+06	766537	848332	613155	562463	1.31819e+06	1.26091e+06	463813	480283	554141	918550	898093	972000	678963	413825	615439	1.22535e+06	566766
A6ND36	Protein FAM83G (Protein associated with SMAD1)	FAM83G	FAM83G PAWS1	823	2	446552	366901	441233	440152	374661	361496	380095	439408	347893	493832	492116	456849	351125	650038	493740	505925	589821	301820	343579	385545	376257	357934	280155	412067	424742	373924	578950	351735	368706	335479	380840	204172	310299	461729	448270	454392	391445	502837	487669	411307	204866	432698	372892	557143
A6NDG6	Glycerol-3-phosphate phosphatase (G3PP) (EC 3.1.3.21) (Aspartate-based ubiquitous Mg(2+)-dependent phosphatase) (AUM) (EC 3.1.3.48) (Phosphoglycolate phosphatase) (PGP)	PGP	PGP	321	2	136270	258588	141483	162966	110601	178215	158867	185024	132651	144945	155734	126607	153487	123156	148859	86691.1	90897.5	115052	119320	177547	120059	94165.2	77991.2	140792	128897	115532	177598	107623	202303	85956.9	152842	141666	140877	106574	135018	114649	109311	193204	128118	136103	58514.4	101358	173010	107944
A6NHR9	Structural maintenance of chromosomes flexible hinge domain-containing protein 1 (SMC hinge domain-containing protein 1)	SMCHD1	SMCHD1 KIAA0650	2005	3	249395	231205	208157	384821	262952	385985	320359	312727	253505	279652	340051	335321	229155	401375	331718	241694	292124	277260	372486	281886	365281	324111	286809	342625	292015	329210	412457	311150	307114	295611	253086	242341	278353	378147	306556	305376	288680	250715	272181	237639	94065.9	242338	225648	311442
A7KAX9	Rho GTPase-activating protein 32 (Brain-specific Rho GTPase-activating protein) (GAB-associated Cdc42/Rac GTPase-activating protein) (GC-GAP) (GTPase regulator interacting with TrkA) (Rho-type GTPase-activating protein 32) (Rho/Cdc42/Rac GTPase-activating protein RICS) (RhoGAP involved in the beta-catenin-N-cadherin and NMDA receptor signaling) (p200RhoGAP) (p250GAP)	ARHGAP32	ARHGAP32 GRIT KIAA0712 RICS	2087	2	123828	180119	289021	247444	208644	338498	184657	208579	134262	187336	205793	183903	171723	273548	221454	177172	158938	167534	297591	216143	309672	286962	199841	229543	206354	247793	357549	222717	236621	156916	108636	167133	218769	230121	243035	256838	167979	111567	158437	167773	64099.7	136285	168323	206636
A8K7I4	Calcium-activated chloride channel regulator 1 (EC 3.4.-.-) (Calcium-activated chloride channel family member 1) (hCLCA1) (Calcium-activated chloride channel protein 1) (CaCC-1) (hCaCC-1)	CLCA1	CLCA1 CACC1	914	4	1.48048e+06	2.49961e+06	2.02844e+06	1.89374e+06	1.74875e+06	1.74669e+06	2.35237e+06	2.833e+06	1.97612e+06	2.03143e+06	2.01059e+06	2.41117e+06	2.95227e+06	1.61704e+06	2.5639e+06	1.19398e+06	1.57621e+06	2.295e+06	1.35419e+06	2.81618e+06	1.42923e+06	1.30313e+06	1.12536e+06	1.62571e+06	2.04346e+06	1.73417e+06	2.40896e+06	1.72461e+06	1.97041e+06	1.30845e+06	1.28623e+06	2.32242e+06	2.16666e+06	1.70626e+06	1.81642e+06	1.5216e+06	1.81277e+06	2.24045e+06	1.77959e+06	1.6427e+06	1.05873e+06	1.74109e+06	2.03385e+06	1.428e+06
A8MXV4	Nucleoside diphosphate-linked moiety X motif 19 (Nudix motif 19) (EC 3.6.1.-)	NUDT19	NUDT19	375	3	357506	681561	654376	478666	414064	512853	528705	638794	455884	518605	566623	493043	527072	500733	587314	347122	457209	537084	425955	583118	451376	395724	341515	477428	463417	447214	658191	418132	445584	332850	354404	582742	586432	434522	510259	445260	451088	529771	534536	397685	247757	398045	623027	434518
B0I1T2	Unconventional myosin-Ig [Cleaved into: Minor histocompatibility antigen HA-2 (mHag HA-2)]	MYO1G	MYO1G HA2	1018	2	150610	154261	110648	313205	229596	188716	179421	422754	178988	173540	189899	255035	472377	158639	322055	193465	144415	234212	166452	107675	152174	114643	120361	140870	90207.7	156843	146073	181035	149947	77962.5	136855	109125	124755	224642	262229	126978	154076	234521	157387	190223	63681.2	136602	346407	148072
B2RTY4	Unconventional myosin-IXa (Unconventional myosin-9a)	MYO9A	MYO9A MYR7	2548	2	531367	432232	524839	768667	400736	598847	755431	639865	420111	386978	561561	562742	427946	772897	683647	572068	625664	416876	647470	619312	565655	301933	617052	636614	484122	550971	689545	323631	491213	456985	368392	420537	614927	880788	718422	654057	643586	654757	496541	514931	277420	538887	491242	836373
K7EJ46	Small integral membrane protein 22	SMIM22	SMIM22	135	2	33919.9	28393	78405.8	51256.9	51520.8	90796.4	43761	123202	35971.1	44409.3	77610.4	35799.7	19678.3	84650.4	50375.7	53450.4	37252.2	63515.1	160460	167244	209990	80327.2	154273	90232.8	46303.8	95767.7	121951	36832.3	84836.7	66579.3	19000	12626	25879.8	81904.2	22400.2	50033.9	69522.5	32024.1	41854.8	35237.2	9328.33	36261.1	16039.5	34077.5
O00116	Alkyldihydroxyacetonephosphate synthase, peroxisomal (Alkyl-DHAP synthase) (EC 2.5.1.26) (Aging-associated gene 5 protein) (Alkylglycerone-phosphate synthase)	AGPS	AGPS AAG5	658	2	181582	277085	294656	260617	246607	345753	275270	396282	258814	244924	549143	330551	272279	355772	411143	277273	281453	263416	555709	317015	401532	364389	403931	388331	287413	360715	444152	329112	319612	257721	206973	274952	314649	297989	312636	271390	196246	276516	269971	285483	138211	225446	410573	258019
O00151	PDZ and LIM domain protein 1 (C-terminal LIM domain protein 1) (Elfin) (LIM domain protein CLP-36)	PDLIM1	PDLIM1 CLIM1 CLP36	329	7	271483	348411	337930	167100	155657	188789	177650	218845	173881	169719	184621	171322	237784	343233	317063	222640	210844	220936	187052	173979	171144	162130	142912	198568	147792	148043	206830	147030	182723	127741	196894	318183	372153	186061	171105	181540	122183	180150	185264	154753	77129	144026	246797	288027
O00154	Cytosolic acyl coenzyme A thioester hydrolase (EC 3.1.2.2) (Acyl-CoA thioesterase 7) (Brain acyl-CoA hydrolase) (BACH) (CTE-IIa) (CTE-II) (Long chain acyl-CoA thioester hydrolase)	ACOT7	ACOT7 BACH	380	2	69854.1	68974.6	38533.9	16735.8	30890.5	70874.4	74635.6	76016.6	43155.6	57935.4	92384.4	81977.3	36122.6	234798	35787.4	141090	176790	126846	178068	139849	160171	222254	141594	182635	125231	133858	187746	112386	144882	103975	66377.4	38236.2	89267.4	60457.9	76024.5	78626	82120.5	57183.5	45620.6	65166.4	36801.9	57360.5	58891.1	156458
O00159	Unconventional myosin-Ic (Myosin I beta) (MMI-beta) (MMIb)	MYO1C	MYO1C	1063	9	274094	273974	268859	227449	194103	270003	292876	362099	252620	278134	307333	272589	240882	373418	361909	250796	289027	285251	284339	312830	299678	229009	214944	252666	252986	246900	361808	234625	266376	190202	251380	291640	252080	224933	227992	214115	220340	234821	263426	206416	108696	187150	253016	308180
O00160	Unconventional myosin-If (Myosin-Ie)	MYO1F	MYO1F	1098	4	356850	681979	620586	524512	421457	502643	542460	688908	498239	456498	591857	475370	667810	444057	678776	310568	394459	531188	378266	674557	370052	323574	310929	456455	580051	471170	691525	449551	494990	339482	295451	637417	539993	428928	629378	328714	467691	560188	457444	362103	189153	385879	667594	283537
O00161	Synaptosomal-associated protein 23 (SNAP-23) (Vesicle-membrane fusion protein SNAP-23)	SNAP23	SNAP23	211	2	42477.4	55989.8	74285.2	73831.9	66185.6	74708.3	63279.5	80222.3	46379.9	61977.9	125688	79031.8	54456.6	132670	92775.5	72813.6	66113.9	51436.6	71299.4	62653.2	80461.9	76411	58870.5	78263.1	43634.9	70403.9	79123.8	77072.3	66043.7	55167.2	66265.1	48842.4	57538.8	73046.3	75483.8	63939.7	55930	123975	68458.3	122350	42613	61180.2	50421.7	86241.8
O00170	AH receptor-interacting protein (AIP) (Aryl-hydrocarbon receptor-interacting protein) (HBV X-associated protein 2) (XAP-2) (Immunophilin homolog ARA9)	AIP	AIP XAP2	330	3	349967	172010	316680	245549	303499	398228	459161	548613	423083	507193	483115	506105	234981	593614	317794	404116	383834	403064	228005	320271	409413	290449	216738	296195	390647	381717	411968	225830	394076	303854	349695	301537	455735	402030	472403	400869	305370	318494	335365	209200	212290	335051	326503	419097
O00186	Syntaxin-binding protein 3 (Platelet Sec1 protein) (PSP) (Protein unc-18 homolog 3) (Unc18-3) (Protein unc-18 homolog C) (Unc-18C)	STXBP3	STXBP3	592	2	1.67349e+06	1.2178e+06	872095	577565	479076	672616	1.00076e+06	1.24364e+06	985925	876091	1.02756e+06	699998	865574	1.66282e+06	1.39247e+06	1.08083e+06	1.21652e+06	1.28334e+06	564402	968857	563878	423915	445292	661224	746198	666216	1.00331e+06	592041	610929	466935	1.69558e+06	1.2436e+06	1.09006e+06	599863	761387	623222	821038	1.28739e+06	987457	698352	417818	807641	1.18042e+06	1.52805e+06
O00193	Small acidic protein	SMAP	SMAP C11orf58	183	2	137985	147937	171772	158019	145966	201972	125379	162598	111896	155260	149751	137980	167152	222351	175690	139360	153665	119469	169002	156353	202758	168947	144576	167866	127008	160770	197731	133446	130124	106398	153532	170026	188180	132025	197640	199172	118639	157313	183060	127640	90763.9	126854	219656	184786
O00194	Ras-related protein Rab-27B (C25KG)	RAB27B	RAB27B	218	2	152767	222656	238060	286275	305570	278481	212164	201789	207679	270530	216895	211167	189330	263728	233380	162095	170135	216372	230374	226395	284677	336190	192290	188412	193211	199154	194566	187806	195153	168440	154178	171556	255493	183340	203107	202769	145328	168716	268583	166663	124998	147487	185852	160655
O00203	AP-3 complex subunit beta-1 (Adaptor protein complex AP-3 subunit beta-1) (Adaptor-related protein complex 3 subunit beta-1) (Beta-3A-adaptin) (Clathrin assembly protein complex 3 beta-1 large chain)	AP3B1	AP3B1 ADTB3A	1094	3	117797	132680	187058	181398	186884	274067	183756	205315	148348	203348	200396	172361	128144	242017	201805	136523	152902	123931	219425	220373	244379	210769	169110	247956	193953	230131	279657	192206	387987	158148	116758	128038	185258	131583	236109	173681	145394	109318	133613	144882	89830.4	108457	143845	184785
O00217	NADH dehydrogenase [ubiquinone] iron-sulfur protein 8, mitochondrial (EC 1.6.5.3) (EC 1.6.99.3) (Complex I-23kD) (CI-23kD) (NADH-ubiquinone oxidoreductase 23 kDa subunit) (TYKY subunit)	NDUFS8	NDUFS8	210	3	66291.6	58646.7	67369.9	82663.4	56067.8	85294.8	79759.3	70173.4	59014.7	71046.7	71568.4	56686.8	55386.3	105536	58125.5	60851.1	62816.7	65819.3	70880.6	45840.4	72307	56757.6	46009.5	71886.1	54558.6	66480.8	82593.4	50076.6	64617.9	45330.1	52621.8	47846.4	61201.6	67428.9	80425.4	68247.9	54137.5	63233.8	60839.4	45450.9	31413.1	43509.4	62554.9	65151.9
O00231	26S proteasome non-ATPase regulatory subunit 11 (26S proteasome regulatory subunit RPN6) (26S proteasome regulatory subunit S9) (26S proteasome regulatory subunit p44.5)	PSMD11	PSMD11	422	12	120533	91583.8	145974	170688	136438	196906	124475	144062	99523.9	140487	163178	128142	89545.2	204664	149595	128199	138440	87638.9	174608	122621	210634	169656	139536	147372	141623	162033	173884	134244	158178	123582	103537	91838.9	148076	160552	156020	164310	94273.8	98598.6	105277	106137	70850.6	92801.8	115533	144157
O00232	26S proteasome non-ATPase regulatory subunit 12 (26S proteasome regulatory subunit RPN5) (26S proteasome regulatory subunit p55)	PSMD12	PSMD12	456	3	44896.2	20352.5	55647.5	93727	37603.3	127002	98338.2	110417	56591.4	33984.8	96274.9	101033	11762.5	130334	85422.3	71156.3	70837.9	44536.3	241659	172889	184800	114203	158397	139337	105625	127434	170503	120587	104644	92333.2	34776.1	29470.5	61820.4	68457.8	51363.8	61669.2	72502.8	26707.5	46153.7	40344.3	11707.3	36876.7	26356.1	66418.9
O00244	Copper transport protein ATOX1 (Metal transport protein ATX1)	ATOX1	ATOX1 HAH1	68	2	171724	180263	228827	187041	105274	190778	186484	178952	175878	136996	185815	161672	232901	252197	220332	156315	152665	145277	183781	160634	195945	183281	168602	134578	151160	146538	261222	96296.9	179937	163596	178815	193374	215823	212801	168127	159879	167364	192988	219898	160212	169836	153414	237561	174337
O00264	Membrane-associated progesterone receptor component 1 (mPR) (Dap1) (IZA)	PGRMC1	PGRMC1 HPR6.6 PGRMC	195	3	194633	223102	218594	170983	142108	202800	189357	255685	189455	182964	215399	192689	198062	397718	245348	222210	262097	184209	157876	223001	174685	125279	111742	157709	167139	165155	221017	181304	160470	101684	175066	167034	221992	137516	200944	167446	134432	192806	148400	137005	92881	132857	170556	326582
O00267	Transcription elongation factor SPT5 (hSPT5) (DRB sensitivity-inducing factor 160 kDa subunit) (DSIF p160) (DRB sensitivity-inducing factor large subunit) (DSIF large subunit) (Tat-cotransactivator 1 protein) (Tat-CT1 protein)	SUPT5H	SUPT5H SPT5 SPT5H	1087	3	273685	463729	434603	367794	303754	381863	439345	486001	363988	410088	430335	407922	497872	315173	455157	236222	263367	407336	341673	496388	348484	307145	263123	352970	386794	359418	524318	349602	337219	268085	247113	418484	435006	332320	390799	312640	359573	374530	341647	318728	195926	316603	434476	237024
O00273	DNA fragmentation factor subunit alpha (DNA fragmentation factor 45 kDa subunit) (DFF-45) (Inhibitor of CAD) (ICAD)	DFFA	DFFA DFF1 DFF45 H13	331	3	19142.4	31406.7	42859.2	41288.6	18168.9	53482.3	18691.5	33713.8	31860.1	45365.1	49080	20269.7	27873.3	52959.7	34793.2	36448.2	34458.2	25397.7	49577.1	42188	58417.2	47066	40631.3	49731.3	37228.6	52963.2	52763.8	30981.9	46315	40199.1	31002	18435.1	45926.7	22248	27147.4	42548.6	19516.3	27609.3	33797.5	38196.5	15990.4	31572.7	31305.6	42916.7
O00299	Chloride intracellular channel protein 1 (Chloride channel ABP) (Nuclear chloride ion channel 27) (NCC27) (Regulatory nuclear chloride ion channel protein) (hRNCC)	CLIC1	CLIC1 G6 NCC27	241	9	306775	219245	365176	477291	404015	544401	306292	348593	246896	417015	444194	363032	216318	597075	370289	339021	355444	217985	494370	301732	547344	492528	369578	407028	403928	476774	506241	355181	431521	329364	270656	199196	350117	406511	466297	458226	214668	264980	248552	301618	183006	259819	231579	452893
O00303	Eukaryotic translation initiation factor 3 subunit F (eIF3f) (Deubiquitinating enzyme eIF3f) (EC 3.4.19.12) (Eukaryotic translation initiation factor 3 subunit 5) (eIF-3-epsilon) (eIF3 p47)	EIF3F	EIF3F EIF3S5	357	4	235854	189987	237754	451423	218473	356818	406533	379097	266021	199014	284918	362092	173593	447769	371694	329109	334903	232295	484200	424341	432753	265897	434938	378171	315504	317203	444045	301647	281631	322814	194725	166908	242057	398954	242606	246744	301033	208736	244265	137303	93361	251435	149114	308378
O00330	Pyruvate dehydrogenase protein X component, mitochondrial (Dihydrolipoamide dehydrogenase-binding protein of pyruvate dehydrogenase complex) (E3-binding protein) (E3BP) (Lipoyl-containing pyruvate dehydrogenase complex component X) (proX)	PDHX	PDHX PDX1	501	2	196865	145608	180796	173754	196908	204811	171058	215043	159224	183880	184034	175310	152992	313461	236134	185588	191422	159561	204902	176390	208962	183991	143509	181235	185578	201678	222519	168686	178196	134001	189953	147531	164879	175206	187204	177301	137717	170297	150375	142566	85708.4	141469	143887	230691
O00338	Sulfotransferase 1C2 (ST1C2) (EC 2.8.2.-) (Sulfotransferase 1C1) (SULT1C#1) (humSULTC2)	SULT1C2	SULT1C2 SULT1C1	296	2	441804	668216	736286	579052	540031	584071	723745	911326	646890	667649	658365	665396	726198	572620	699955	351339	497511	591155	489815	750724	497364	419133	376618	547370	551469	501458	687851	510320	559069	413287	419528	645884	732765	528980	589061	514512	598176	703660	686419	501014	367364	562774	742822	408310
O00339	Matrilin-2	MATN2	MATN2 UNQ193/PRO219	956	3	90678.1	100614	115165	110665	103751	126646	90372.7	140198	91660.4	101023	92214.2	93400	98272.9	134192	103860	111531	98938.5	86095.4	144235	118478	131207	116709	81348.5	135474	112841	111112	169644	102325	134494	77586.2	60680.7	91481.8	110124	101171	135929	136817	68334.3	92718.6	92755.6	94991.4	39007.4	86770	109121	126266
O00391	Sulfhydryl oxidase 1 (hQSOX) (EC 1.8.3.2) (Quiescin Q6)	QSOX1	QSOX1 QSCN6 UNQ2520/PRO6013	747	2	523140	493323	513331	471270	392304	445841	454201	662824	533385	501046	539044	490273	405563	641497	602050	542112	542768	566307	424729	567067	564358	429610	338587	444303	458911	421761	555204	414060	444008	317417	541395	482048	548590	536359	496277	473819	428756	471116	567693	349564	238419	406341	466335	670677
O00401	Neural Wiskott-Aldrich syndrome protein (N-WASP)	WASL	WASL	505	3	42524.7	44444	83537.3	58416.6	43891.4	99381.9	67878.8	85313.7	54342.4	63157.7	90682.6	81171.5	38539.4	83893.8	86086	47297.3	56027.8	44715.4	95026.3	125361	98321.7	70013	59161.6	84292.5	75364.3	95086.2	144181	80632.5	99079.5	65152.8	27605.9	46806.1	73605.3	57304.5	44685.3	50498.4	49239	25454.8	42166.7	60228	16491.7	32232.7	57274.7	47596.2
O00410	Importin-5 (Imp5) (Importin subunit beta-3) (Karyopherin beta-3) (Ran-binding protein 5) (RanBP5)	IPO5	IPO5 KPNB3 RANBP5	1097	5	28381.8	24033.3	36506.5	57553.5	26846.3	77143.3	31481.6	36805.5	15319.4	40210.5	42853.3	40276.7	26688.4	56242	38103.8	33792.6	29818.5	41399.9	57494.4	41077.2	73662.2	45729.2	48885.2	59877	42057.6	54446.3	49973.7	56194.3	55020.9	43172.7	19682.1	19772.5	37903.3	46705.1	38842.5	43451.5	21582	20080.3	22434.8	32078.4	24196.6	24252.7	19370.5	37239.2
O00411	DNA-directed RNA polymerase, mitochondrial (MtRPOL) (EC 2.7.7.6)	POLRMT	POLRMT	1230	2	177746	195364	179961	143177	115711	178340	161970	198500	171110	204608	197202	169151	161352	273153	232978	168457	241567	161367	213185	206348	208706	199308	146439	165417	183971	169193	184220	162870	187342	114824	184419	138830	182287	123585	134677	136484	134972	167602	185548	136413	85491.1	122477	164782	239568
O00418	Eukaryotic elongation factor 2 kinase (eEF-2 kinase) (eEF-2K) (EC 2.7.11.20) (Calcium/calmodulin-dependent eukaryotic elongation factor 2 kinase)	EEF2K	EEF2K	725	2	193155	197694	178549	273722	212909	303065	236156	299845	197869	232790	238497	194791	191355	329502	292649	232112	233171	228237	269082	231557	240683	208119	189034	193714	230262	229640	282234	176476	237803	192472	155337	193067	214140	236701	252929	217810	193469	205323	210817	154179	101003	196163	212268	252260
O00422	Histone deacetylase complex subunit SAP18 (18 kDa Sin3-associated polypeptide) (2HOR0202) (Cell growth-inhibiting gene 38 protein) (Sin3-associated polypeptide p18)	SAP18	SAP18 GIG38	153	2	131833	112893	208742	320607	132902	284019	353423	378589	272537	126244	298247	327782	100874	369593	298241	255777	303030	169431	820527	544569	604053	319176	552246	447640	393649	399876	503661	386415	332434	331332	105357	139143	208436	258461	129615	205286	294827	117881	230566	125478	52055.9	127401	93785.6	259449
O00423	Echinoderm microtubule-associated protein-like 1 (EMAP-1) (HuEMAP-1)	EML1	EML1 EMAP1 EMAPL EMAPL1	815	2	284958	319893	333941	322154	290765	411538	338981	343759	263491	330073	462082	474219	469595	436388	481599	307329	369690	401473	350620	482290	305373	296140	275688	323904	364929	351844	511159	317012	381156	258893	396925	369943	379073	287862	271293	299964	271365	330371	332572	333653	278521	359625	589849	379476
O00429	Dynamin-1-like protein (EC 3.6.5.5) (Dnm1p/Vps1p-like protein) (DVLP) (Dynamin family member proline-rich carboxyl-terminal domain less) (Dymple) (Dynamin-like protein) (Dynamin-like protein 4) (Dynamin-like protein IV) (HdynIV) (Dynamin-related protein 1)	DNM1L	DNM1L DLP1 DRP1	736	5	92861.4	85610.1	113310	151298	122342	187237	141706	144997	128885	116230	151595	94901.5	119292	179717	151896	152585	117742	96164.8	169456	126117	150850	139368	126651	132861	105707	146310	180382	124588	136266	110816	105860	80901.3	127924	143771	119099	135375	108351	103195	140352	74597	47577.4	76743.4	84920.8	132689
O00442	RNA 3'-terminal phosphate cyclase (RNA cyclase) (RNA-3'-phosphate cyclase) (EC 6.5.1.4) (RNA terminal phosphate cyclase domain-containing protein 1) (RTC domain-containing protein 1)	RTCA	RTCA RPC RPC1 RTC1 RTCD1	366	3	10989.2	12777.2	17535.8	29799.4	13928.9	35014.1	26646.3	24210.2	13712.8	10540.3	21221	16748.6	8253.17	32433.4	20495.8	8853.48	17884.2	7423.3	52035.2	15165.1	57918.1	53748.9	27966.4	37347.1	28693.7	26384.4	33707.2	29169.4	35500.4	16170.3	9037.38	11055.9	14376	22874.3	16218.2	25224.6	22409.8	6479.01	14463.1	12579.7	3802.69	7547.34	11440.4	14246.2
O00443	Phosphatidylinositol 4-phosphate 3-kinase C2 domain-containing subunit alpha (PI3K-C2-alpha) (PtdIns-3-kinase C2 subunit alpha) (EC 2.7.1.154) (Phosphoinositide 3-kinase-C2-alpha)	PIK3C2A	PIK3C2A	1686	2	1.08015e+06	963256	987579	836137	584381	801925	931070	882552	895225	1.05642e+06	1.21972e+06	1.01844e+06	742445	1.22574e+06	925556	983038	1.24022e+06	896053	840170	1.02444e+06	921106	780678	689721	955771	907379	824145	1.29743e+06	801131	755665	601394	1.01677e+06	1.07508e+06	918839	616453	847462	690118	816371	979183	1.07106e+06	795567	295553	676049	909263	1.14596e+06
O00459	Phosphatidylinositol 3-kinase regulatory subunit beta (PI3-kinase regulatory subunit beta) (PI3K regulatory subunit beta) (PtdIns-3-kinase regulatory subunit beta) (Phosphatidylinositol 3-kinase 85 kDa regulatory subunit beta) (PI3-kinase subunit p85-beta) (PtdIns-3-kinase regulatory subunit p85-beta)	PIK3R2	PIK3R2	728	3	641026	732843	746692	672629	540553	708910	703426	806672	610642	688442	715977	647597	730114	883333	870353	590850	679907	636536	714232	760125	712411	592536	517429	660748	637776	642681	850263	615659	705146	473806	680369	733218	779067	666353	743504	636122	532550	625247	635863	527282	328195	517926	804454	743957
O00468	Agrin [Cleaved into: Agrin N-terminal 110 kDa subunit; Agrin C-terminal 110 kDa subunit; Agrin C-terminal 90 kDa fragment (C90); Agrin C-terminal 22 kDa fragment (C22)]	AGRN	AGRN AGRIN	2067	7	166388	140513	177920	176047	139095	221598	168514	216387	145215	184376	193547	186534	124311	238749	179897	164135	171716	123484	229665	187121	236084	154865	192163	187191	170727	191179	271647	167878	197899	161530	155614	132063	158129	168204	152771	149780	136577	112207	152017	127397	66641.6	143026	166102	172109
O00469	Procollagen-lysine,2-oxoglutarate 5-dioxygenase 2 (EC 1.14.11.4) (Lysyl hydroxylase 2) (LH2)	PLOD2	PLOD2	737	3	481677	456111	446239	627961	470590	668841	625491	573191	493902	644462	663374	525913	533349	788092	628980	416778	478001	496382	572004	635478	603698	504241	484075	586420	546850	583792	674430	502795	630026	541550	457419	494435	546056	582993	572295	546420	495060	515137	509114	355986	469263	507026	586146	566544
O00483	Cytochrome c oxidase subunit NDUFA4 (Complex I-MLRQ) (CI-MLRQ) (NADH-ubiquinone oxidoreductase MLRQ subunit)	NDUFA4	NDUFA4	81	2	85902	78595.2	106407	106627	85973.8	85162.9	71496.5	71932.2	81036.9	77028.8	92569.2	82846.9	70541.6	119966	120081	79503.5	91114.2	57540.1	122011	66769.1	145513	106617	94362.2	99385.7	103127	106745	127503	97510.3	117983	93925.8	94887	67775.7	94436.8	101883	99364.6	107820	67696.5	58367.5	111453	81738.4	43460.6	83131.9	82978.8	120121
O00487	26S proteasome non-ATPase regulatory subunit 14 (EC 3.4.19.-) (26S proteasome regulatory subunit RPN11) (26S proteasome-associated PAD1 homolog 1)	PSMD14	PSMD14 POH1	310	3	500100	449123	582016	555678	458883	645613	645481	580403	438271	443351	585452	712955	489963	891080	627364	567327	296867	449236	876256	664964	515055	556346	750628	341515	475844	556308	795681	539704	807487	533072	355377	357930	360003	672398	584996	537965	462924	402304	384136	337957	240068	536515	535278	785673
O00499	Myc box-dependent-interacting protein 1 (Amphiphysin II) (Amphiphysin-like protein) (Box-dependent myc-interacting protein 1) (Bridging integrator 1)	BIN1	BIN1 AMPHL	593	2	173822	189591	213934	200487	162223	202156	189046	242467	158243	179870	185077	195371	203131	246965	275681	175286	177850	176521	194844	169103	193051	162345	138045	188005	178543	177961	207140	157500	188828	151556	197595	191860	248366	178734	200519	196300	163616	203855	231366	164096	116842	179710	241781	231827
O00519	Fatty-acid amide hydrolase 1 (EC 3.5.1.99) (Anandamide amidohydrolase 1) (Oleamide hydrolase 1)	FAAH	FAAH FAAH1	579	2	29334.4	37061	33417.4	51675.7	56269.9	58705.5	40402.4	45477	25753.4	68736.6	68281.2	41463.7	37706.8	83229	38300.4	26358.4	58000.9	31278.8	38087.5	52427.4	58127.5	60031.5	47643.9	43636.8	38505.4	178374	56061.6	52298.7	40957	23290.5	39511.5	31384	36786.1	36611.6	59881.2	40933.9	35187.9	34472.7	55011.6	30457.1	29624.4	25355.9	43883.8	73725.6
O00560	Syntenin-1 (Melanoma differentiation-associated protein 9) (MDA-9) (Pro-TGF-alpha cytoplasmic domain-interacting protein 18) (TACIP18) (Scaffold protein Pbp1) (Syndecan-binding protein 1)	SDCBP	SDCBP MDA9 SYCL	298	7	108369	78307.3	124895	136809	118291	150172	122704	135199	98863.5	116899	162743	128020	96375	169389	129688	101356	121989	130998	205446	122211	207833	151080	131529	133797	140571	157633	190486	127722	136290	118612	109860	98869	111183	118162	167587	141441	88530.3	88669.8	107111	117371	53357.2	87301.4	75495.5	135684
O00567	Nucleolar protein 56 (Nucleolar protein 5A)	NOP56	NOP56 NOL5A	594	7	68508	71607.9	90354.1	111039	100130	125935	82026	93337.8	71559	84027.5	99611.6	90773.9	62786.7	123661	105526	84399.7	82275.1	72654.5	136170	102337	140422	95474.8	95030.8	99263.6	91123.3	103007	132578	89783.5	96448.7	74979	70158.8	62990.8	95333.5	110189	116666	102843	68030.4	70646.4	75065.9	70024.4	32962	67264.7	73978.1	102459
O00571	ATP-dependent RNA helicase DDX3X (EC 3.6.4.13) (DEAD box protein 3, X-chromosomal) (DEAD box, X isoform) (Helicase-like protein 2) (HLP2)	DDX3X	DDX3X DBX DDX3	662	4	128650	80838.1	112183	146611	112393	142400	121845	124480	97538.6	109712	133047	108955	77839	190559	129376	124438	116166	96391.7	139333	118683	157282	117280	122683	119049	120476	151134	154183	109001	129274	110235	103660	79186.7	128778	143780	125900	123989	89211.4	73855.9	107959	84750.2	47260.3	86097.6	88846.1	162818
O00584	Ribonuclease T2 (EC 3.1.27.-) (Ribonuclease 6)	RNASET2	RNASET2 RNASE6PL	256	4	91727.7	132109	134039	163801	129349	185453	103196	140876	122419	191221	175005	199091	125602	151903	122089	93585.8	111758	120896	195949	127350	233124	146543	154759	161995	165314	183155	188679	139850	151286	124376	97771.2	92352.6	122415	128012	138753	135998	97109.7	117149	83854.4	151540	75626.5	146296	157218	113317
O00622	Protein CYR61 (CCN family member 1) (Cysteine-rich angiogenic inducer 61) (Insulin-like growth factor-binding protein 10) (IBP-10) (IGF-binding protein 10) (IGFBP-10) (Protein GIG1)	CYR61	CYR61 CCN1 GIG1 IGFBP10	381	2	495315	605480	487208	452357	450410	574890	419641	500358	409698	525597	462980	377745	440972	549669	576506	416975	497007	459375	383942	415346	377048	393912	344216	422653	363776	351174	537671	269297	411224	336948	575836	546082	535628	446940	409289	478658	449977	587144	589625	381620	471763	460437	568789	517228
O00743	Serine/threonine-protein phosphatase 6 catalytic subunit (PP6C) (EC 3.1.3.16) [Cleaved into: Serine/threonine-protein phosphatase 6 catalytic subunit, N-terminally processed]	PPP6C	PPP6C PPP6	305	2	40790.9	40947.6	43952.6	74420.1	47027.2	92638.7	55551.4	66487.7	42038.2	56402	51705.5	60560.1	60305.1	60951.7	58415.2	40475.6	49376	49646.2	78158.7	62551.8	59915.1	49251.7	50063.9	53101	45930	49116.9	57965.1	44865.1	52564.5	39272.2	44872.8	44038.2	50422	66151	72025.7	50095.2	40188.1	57757.8	46452.5	38653.2	30193.2	35158.4	38331.3	56040.3
O00746	Nucleoside diphosphate kinase, mitochondrial (NDK) (NDP kinase, mitochondrial) (EC 2.7.4.6) (Nucleoside diphosphate kinase D) (NDPKD) (nm23-H4)	NME4	NME4 NM23D	187	2	179307	376416	462291	253906	211870	291295	284912	318472	253495	271480	259301	296524	212716	345671	378633	210324	265746	235515	296593	665551	288669	226017	192288	212816	252487	248665	355734	222975	267547	193826	308716	216674	286023	213814	244746	237368	184957	247307	281439	223345	129105	191414	284024	323710
O00748	Cocaine esterase (EC 3.1.1.84) (Carboxylesterase 2) (CE-2) (hCE-2) (EC 3.1.1.1) (Methylumbelliferyl-acetate deacetylase 2) (EC 3.1.1.56)	CES2	CES2 ICE	559	3	857911	819527	969980	846017	805987	870252	877953	943771	726413	965860	892825	887007	757364	822414	1.09359e+06	732465	761569	816201	842371	837162	591436	723909	699604	769265	828846	810572	1.06534e+06	655401	666272	632148	944377	707641	768537	837358	902286	813383	696293	884490	833935	626125	674495	835790	872538	814870
O00754	Lysosomal alpha-mannosidase (Laman) (EC 3.2.1.24) (Lysosomal acid alpha-mannosidase) (Mannosidase alpha class 2B member 1) (Mannosidase alpha-B) [Cleaved into: Lysosomal alpha-mannosidase A peptide; Lysosomal alpha-mannosidase B peptide; Lysosomal alpha-mannosidase C peptide; Lysosomal alpha-mannosidase D peptide; Lysosomal alpha-mannosidase E peptide]	MAN2B1	MAN2B1 LAMAN MANB	1011	4	251104	210677	324332	386282	310504	491501	227259	350694	179252	326736	345822	327874	185167	565638	264229	344837	355486	181001	504056	262918	618884	485486	292744	313997	294273	496997	480964	356507	437606	314917	225817	142386	419218	285260	387931	402009	175282	280298	284628	256363	167529	276274	198288	437089
O00762	Ubiquitin-conjugating enzyme E2 C (EC 2.3.2.23) ((E3-independent) E2 ubiquitin-conjugating enzyme C) (EC 2.3.2.24) (E2 ubiquitin-conjugating enzyme C) (UbcH10) (Ubiquitin carrier protein C) (Ubiquitin-protein ligase C)	UBE2C	UBE2C UBCH10	179	2	204281	289293	343674	388727	283476	392919	370856	367030	341053	411684	458411	408563	345863	501977	291586	310113	342796	315018	332901	453013	326212	298233	272226	326655	376387	337407	515681	302354	364261	158501	247929	232464	322714	359024	317059	330450	289191	264857	324012	330312	218226	426115	344440	215641
O00763	Acetyl-CoA carboxylase 2 (EC 6.4.1.2) (ACC-beta) [Includes: Biotin carboxylase (EC 6.3.4.14)]	ACACB	ACACB ACC2 ACCB	2458	2	36336.7	19315.5	53229.6	34667.3	30805.5	62854.1	35283.5	44788.5	29753.3	39649.1	40665.2	38150	32602.7	65900	34131.8	42556.6	35874.9	24472.9	55457.6	35380.2	59997.7	62037.8	41451.6	54775.4	38840.9	47751.6	62500.2	37544.6	43002.7	35440	25957.7	28826.4	45481.9	41647	45173.4	42154.7	27436.6	22547.9	33784.1	28815.5	17036.2	34268.7	31014.7	87330.9
O14494	Phospholipid phosphatase 1 (EC 3.1.3.4) (Lipid phosphate phosphohydrolase 1) (PAP2-alpha) (Phosphatidate phosphohydrolase type 2a) (Phosphatidic acid phosphatase 2a) (PAP-2a) (PAP2a)	PLPP1	PLPP1 LPP1 PPAP2A	284	3	47496.1	64063.3	129725	129860	116758	156977	84827.9	113569	69161.5	100639	98665.1	81663.7	28285.5	158089	121653	96511.2	112241	43357.1	192862	124323	180097	178438	122134	123541	98270	114320	160517	110835	104655	90921.1	81543.2	83016.2	125985	73116.5	126056	130650	61546.5	51335.8	81129.9	68167	35007.2	54490.6	84256.5	126041
O14497	AT-rich interactive domain-containing protein 1A (ARID domain-containing protein 1A) (B120) (BRG1-associated factor 250) (BAF250) (BRG1-associated factor 250a) (BAF250A) (Osa homolog 1) (hOSA1) (SWI-like protein) (SWI/SNF complex protein p270) (SWI/SNF-related, matrix-associated, actin-dependent regulator of chromatin subfamily F member 1) (hELD)	ARID1A	ARID1A BAF250 BAF250A C1orf4 OSA1 SMARCF1	2285	2	190969	93922.8	138086	136379	127462	174352	163772	149155	163646	149465	142415	152538	105295	169879	218762	96602.2	171711	105075	143228	133198	142448	147978	120951	82144.8	124648	148511	176176	118485	140164	110070	180161	134048	122715	136679	138164	132580	109487	171601	166469	115295	139138	154047	131743	179790
O14519	Cyclin-dependent kinase 2-associated protein 1 (CDK2-associated protein 1) (Deleted in oral cancer 1) (DOC-1) (Putative oral cancer suppressor)	CDK2AP1	CDK2AP1 CDKAP1 DOC1	115	3	4722.58	3406.81	10110.5	4401.15	5204.93	7329.76	4313.92	8790.25	5100.53	4520.16	3594.52	6310.79	4222.61	6053.94	5947.1	7339.54	4817.78	5850.5	8985.96	9296.05	13787.9	9515.56	7151.09	9484.95	4497.29	7264.22	10851.1	13246.1	10686.2	8452.92	3956.69	2994.03	8755.17	7141.26	5453.19	6966.18	4985.89	3160.27	5682.85	4989.05	2084.39	4084.97	4948.49	7898.26
O14556	Glyceraldehyde-3-phosphate dehydrogenase, testis-specific (EC 1.2.1.12) (Spermatogenic cell-specific glyceraldehyde 3-phosphate dehydrogenase 2) (GAPDH-2) (Spermatogenic glyceraldehyde-3-phosphate dehydrogenase)	GAPDHS	GAPDHS GAPD2 GAPDH2 GAPDS HSD-35 HSD35	408	2	151342	128214	209627	212097	223678	284335	159135	187978	159720	66640.7	101688	109290	121866	297577	283171	159154	159929	120056	147239	176178	181530	141818	123652	149395	134292	211560	163432	131770	143162	154083	177536	111394	199678	202341	213093	191555	132663	135324	152568	98774.8	81819	99588.8	147527	176036
O14558	Heat shock protein beta-6 (HspB6) (Heat shock 20 kDa-like protein p20)	HSPB6	HSPB6	160	7	86421	204175	314588	147072	125616	152820	226866	256354	171337	186851	186552	141496	312981	253262	275947	175261	196581	187177	203793	258617	152396	177884	112586	184410	170185	107240	303145	186535	151290	135677	115914	205391	296592	139293	167384	123868	189462	175413	192019	143322	68824.5	132869	321184	183327
O14579	Coatomer subunit epsilon (Epsilon-coat protein) (Epsilon-COP)	COPE	COPE	308	5	87082.8	64317.1	100227	145433	120237	189401	94391.9	113667	82280.9	119383	137943	120302	58279.8	141278	83762.2	87169.5	97231	104258	166378	110778	192412	173072	129147	132240	126064	144330	164964	131418	153904	119721	81618.7	59950.4	99209.4	135664	136707	144250	88628.4	66656	87878.5	94986.3	51159.2	82898.5	59174.6	117981
O14617	AP-3 complex subunit delta-1 (AP-3 complex subunit delta) (Adaptor-related protein complex 3 subunit delta-1) (Delta-adaptin)	AP3D1	AP3D1 PRO0039	1153	3	37213.2	71247.3	59603	64956.7	66532.9	116041	57123.7	67233.3	40636	65428.6	68740.8	43666.4	48163.4	88579.9	100427	57940.9	57452.8	37608	104170	60333.3	116095	90540.8	81095.1	83326.3	77762	64018.7	93766.1	66392.4	79727.2	61284.7	44352.3	15991.7	64345.6	74607.4	78928.4	95566.7	40178	58953.3	47192.4	37530.2	23247.8	44207.9	56192.5	74631.8
O14639	Actin-binding LIM protein 1 (abLIM-1) (Actin-binding LIM protein family member 1) (Actin-binding double zinc finger protein) (LIMAB1) (Limatin)	ABLIM1	ABLIM1 ABLIM KIAA0059 LIMAB1	778	6	780599	1.61704e+06	1.6033e+06	921589	773442	918090	1.54338e+06	1.38614e+06	1.19143e+06	1.19741e+06	1.22871e+06	939362	1.56778e+06	1.06784e+06	1.17964e+06	806020	1.00075e+06	1.15246e+06	803755	1.8224e+06	1.03705e+06	917755	671361	1.14076e+06	1.10868e+06	868761	1.48063e+06	882612	1.05668e+06	866923	787634	1.68097e+06	1.73407e+06	770551	952501	866705	1.13423e+06	1.23617e+06	1.33808e+06	911120	588069	955713	1.69018e+06	911873
O14641	Segment polarity protein dishevelled homolog DVL-2 (Dishevelled-2) (DSH homolog 2)	DVL2	DVL2	736	2	307215	98347.7	92147.3	507806	423582	551776	745382	942718	572863	642806	642225	595769	978414	454817	284237	309488	505555	656272	422583	948018	445145	381799	340606	577158	560957	502610	985601	557063	636043	349580	317301	871516	706391	466134	575146	422606	518926	705713	556656	452769	227789	437942	959324	381401
O14654	Insulin receptor substrate 4 (IRS-4) (160 kDa phosphotyrosine protein) (py160) (Phosphoprotein of 160 kDa) (pp160)	IRS4	IRS4	1257	2	509744	499810	587367	715690	641395	749504	622429	777893	440309	692447	803044	663731	673902	856090	658887	575966	620308	494195	603043	731739	667146	602695	448420	611748	629891	649234	892980	652864	677140	509350	526286	580173	616225	741535	841802	687313	523644	476361	440700	547253	353572	477326	604020	739967
O14656	Torsin-1A (Dystonia 1 protein) (Torsin ATPase-1A) (EC 3.6.4.-) (Torsin family 1 member A)	TOR1A	TOR1A DQ2 DYT1 TA TORA	332	2	128677	94295.3	274579	337126	187072	370593	211186	237125	115677	154840	165063	177246	104507	406683	146229	233631	246421	107264	283161	138564	412692	275023	234864	136937	194871	286129	274570	207534	264380	184850	136352	94380.2	253802	224567	204796	244957	164129	152382	172767	151024	64621.4	129462	157942	318086
O14657	Torsin-1B (Torsin ATPase-1B) (EC 3.6.4.-) (Torsin family 1 member B)	TOR1B	TOR1B DQ1 FKSG18	336	2	168155	192410	270406	237819	225635	290923	246342	238607	221653	239670	219889	253102	176386	428983	234184	241864	273392	207037	299348	353966	380620	454773	213695	326088	288586	387423	424010	311880	358819	203977	244225	162111	329246	308184	310327	396496	219714	210194	244654	263494	131376	157884	232365	330583
O14672	Disintegrin and metalloproteinase domain-containing protein 10 (ADAM 10) (EC 3.4.24.81) (CDw156) (Kuzbanian protein homolog) (Mammalian disintegrin-metalloprotease) (CD antigen CD156c)	ADAM10	ADAM10 KUZ MADM	748	5	149621	95313.4	126136	144260	110280	173964	142717	133300	102135	171622	164089	161530	103352	183820	156345	140731	121447	108044	144642	113799	194893	166465	129563	144568	133109	164574	184070	125735	152984	125036	115641	136707	134557	136446	137418	128130	103328	144228	112292	112596	82766.9	106513	138459	135824
O14733	Dual specificity mitogen-activated protein kinase kinase 7 (MAP kinase kinase 7) (MAPKK 7) (EC 2.7.12.2) (JNK-activating kinase 2) (MAPK/ERK kinase 7) (MEK 7) (Stress-activated protein kinase kinase 4) (SAPK kinase 4) (SAPKK-4) (SAPKK4) (c-Jun N-terminal kinase kinase 2) (JNK kinase 2) (JNKK 2)	MAP2K7	MAP2K7 JNKK2 MEK7 MKK7 PRKMK7 SKK4	419	2	981710	819223	1.31264e+06	1.18588e+06	1.07387e+06	1.15716e+06	1.03146e+06	1.24318e+06	1.05799e+06	1.50425e+06	1.45195e+06	1.20456e+06	1.10332e+06	1.48659e+06	1.28637e+06	1.00667e+06	1.28002e+06	1.02206e+06	1.19783e+06	1.28778e+06	1.31382e+06	1.3164e+06	980429	1.23821e+06	1.33076e+06	1.31433e+06	1.52058e+06	1.15528e+06	1.27863e+06	1.10429e+06	1.06054e+06	1.28553e+06	1.12333e+06	1.24952e+06	1.08439e+06	1.13526e+06	890515	1.13406e+06	1.16872e+06	1.3374e+06	783666	1.14873e+06	1.26268e+06	1.185e+06
O14737	Programmed cell death protein 5 (TF-1 cell apoptosis-related protein 19) (Protein TFAR19)	PDCD5	PDCD5 TFAR19	125	3	36827	38826.5	46632.5	65353.1	56810.5	80195.3	53214.6	62102.4	35737.3	58292.5	56904.5	45466.7	31179.6	64518.9	49650.8	22099.6	38242.7	16827.3	51268.6	38907.4	50897.9	59067.4	54579.3	58916	47569.8	58514.6	57432.7	48646.4	47359.2	51366.9	40605	30792.9	54736.9	58190.6	59284.8	56263.9	33228.6	35730.1	71005.1	45802.6	26441.3	36252.2	22685	52619.5
O14744	Protein arginine N-methyltransferase 5 (EC 2.1.1.320) (72 kDa ICln-binding protein) (Histone-arginine N-methyltransferase PRMT5) (Jak-binding protein 1) (Shk1 kinase-binding protein 1 homolog) (SKB1 homolog) (SKB1Hs) [Cleaved into: Protein arginine N-methyltransferase 5, N-terminally processed]	PRMT5	PRMT5 HRMT1L5 IBP72 JBP1 SKB1	637	3	147396	123093	195212	425514	84460.8	639676	130254	190773	146203	52808.8	143405	69268.2	155987	166345	193711	246357	178198	144510	209619	158182	228360	223085	149457	189548	170933	184994	309343	170869	196648	148072	143975	134539	191349	396824	85885.8	283791	129143	127153	142283	180831	94961.4	122778	122896	202157
O14745	Na(+)/H(+) exchange regulatory cofactor NHE-RF1 (NHERF-1) (Ezrin-radixin-moesin-binding phosphoprotein 50) (EBP50) (Regulatory cofactor of Na(+)/H(+) exchanger) (Sodium-hydrogen exchanger regulatory factor 1) (Solute carrier family 9 isoform A3 regulatory factor 1)	SLC9A3R1	SLC9A3R1 NHERF NHERF1	358	8	49905.4	35994	65527.2	58343.3	54912	68331.1	52008.1	44841.7	42055.7	85065.6	77886.7	59775.9	38937.8	101861	62954.3	55281.2	65697.2	52204.4	80421.6	43017.1	88114.3	80643.9	66517	70140.2	61883.7	72044.5	92596.3	57727.4	62816	54172.6	48450.6	40823.7	60145.7	42911.4	62624.8	57976.3	37539.1	61788.3	45753.9	53774.4	34635	43899.9	40538	73187.4
O14757	Serine/threonine-protein kinase Chk1 (EC 2.7.11.1) (CHK1 checkpoint homolog) (Cell cycle checkpoint kinase) (Checkpoint kinase-1)	CHEK1	CHEK1 CHK1	476	2	679237	1.49123e+06	1.26476e+06	998129	847165	823017	1.29855e+06	1.53916e+06	1.11948e+06	1.02515e+06	1.09761e+06	1.16262e+06	1.76354e+06	774236	1.45789e+06	626143	820365	1.31488e+06	771586	1.35646e+06	865556	703954	505752	751773	1.00049e+06	848442	1.28011e+06	903741	1.03675e+06	596381	649106	1.38925e+06	1.03985e+06	934018	887653	690190	1.03219e+06	1.07131e+06	840494	854684	555932	884176	1.32073e+06	608008
O14772	Fucose-1-phosphate guanylyltransferase (EC 2.7.7.30) (GDP-L-fucose diphosphorylase) (GDP-L-fucose pyrophosphorylase)	FPGT	FPGT GFPP	594	5	385696	530136	548670	392462	353107	384067	505871	588236	484320	469909	504394	602244	700818	569812	664856	409632	493519	624159	382138	611472	509121	292394	316495	420755	466848	412292	601305	377483	482857	350803	374368	475623	481132	463992	383740	308308	430695	509739	466770	395031	247241	381871	661687	443400
O14773	Tripeptidyl-peptidase 1 (TPP-1) (EC 3.4.14.9) (Cell growth-inhibiting gene 1 protein) (Lysosomal pepstatin-insensitive protease) (LPIC) (Tripeptidyl aminopeptidase) (Tripeptidyl-peptidase I) (TPP-I)	TPP1	TPP1 CLN2 GIG1 UNQ267/PRO304	563	5	123393	88486.9	126536	263955	189382	408028	163255	197537	133070	259940	280320	217308	101562	239455	152267	125787	121879	141312	483281	213657	552952	365445	317433	329259	318367	357737	420264	364530	416332	272210	105050	112363	155903	240218	214730	307585	106257	103235	162708	201556	94948.2	133223	136944	168334
O14776	Transcription elongation regulator 1 (TATA box-binding protein-associated factor 2S) (Transcription factor CA150)	TCERG1	TCERG1 CA150 TAF2S	1098	2	543453	689451	621120	570157	479519	792870	573251	693696	535908	586930	616274	525346	303367	532815	644463	496222	518319	624615	553466	704072	557672	486983	204527	563486	579933	513632	633478	497500	682962	476202	547132	676087	626142	577270	510167	499645	511566	590675	491876	470533	299098	504191	275364	487602
O14777	Kinetochore protein NDC80 homolog (Highly expressed in cancer protein) (Kinetochore protein Hec1) (HsHec1) (Kinetochore-associated protein 2) (Retinoblastoma-associated protein HEC)	NDC80	NDC80 HEC HEC1 KNTC2	642	2	175708	212942	203997	249780	185057	255277	188808	227394	173206	211409	206989	186133	268885	277480	201418	201601	214949	221944	195241	215607	254248	220786	178451	222823	192204	212147	275869	180688	226818	183268	160995	180554	218401	204793	241860	193018	175626	274158	140848	164970	130701	166188	272545	199706
O14787	Transportin-2 (Karyopherin beta-2b)	TNPO2	TNPO2	897	2	377973	278866	239733	207756	228809	217146	290485	330538	322724	269207	301387	267120	371693	397179	355816	321037	378611	361636	249117	266892	211391	227202	159695	256675	223585	195150	325905	205260	237263	163889	402219	352062	334907	237921	210061	259401	271981	254532	306812	197349	129139	191295	234962	405301
O14791	Apolipoprotein L1 (Apolipoprotein L) (Apo-L) (ApoL) (Apolipoprotein L-I) (ApoL-I)	APOL1	APOL1 APOL	398	2	64782.7	174325	99547.5	117324	87778.9	165317	108623	163982	78177.8	85325.5	158040	106925	473164	203650	357475	161110	240618	347760	211886	378231	195819	179546	169990	278152	283052	245875	375849	263732	280431	186661	165513	109736	100533	95062.9	146536	102200	102083	111058	155363	50816.8	78575.2	131225	443422	211400
O14818	Proteasome subunit alpha type-7 (EC 3.4.25.1) (Proteasome subunit RC6-1) (Proteasome subunit XAPC7)	PSMA7	PSMA7 HSPC	248	6	180281	191560	242404	277696	213954	332551	223626	229220	176148	236619	266362	231887	168586	276281	241282	209299	224582	150173	289808	216512	318175	245486	208544	241023	202474	248669	280755	204977	218564	181771	178652	169411	231606	273886	291160	273137	166676	146734	196228	205050	105395	183217	151186	237981
O14841	5-oxoprolinase (EC 3.5.2.9) (5-oxo-L-prolinase) (5-OPase) (Pyroglutamase)	OPLAH	OPLAH	1288	4	190708	417398	422806	334763	231180	332448	489464	454039	285653	396949	380374	339324	432713	281805	385051	197684	273203	279965	236785	516090	284356	280472	198562	291260	368648	270058	457169	286025	319690	202545	263029	397201	295563	253479	298427	313223	226585	326076	308043	239089	211995	252242	414445	209855
O14874	[3-methyl-2-oxobutanoate dehydrogenase [lipoamide]] kinase, mitochondrial (EC 2.7.11.4) (Branched-chain alpha-ketoacid dehydrogenase kinase) (BCKD-kinase) (BCKDHKIN)	BCKDK	BCKDK	412	3	16952.4	30504.5	39588.2	48833.9	26969	63780.7	34254.1	45064.7	36713.1	42039.9	49799.4	45003.3	14798.6	77593.5	25269.3	47938.5	28433.2	28284.9	89952.5	64805.4	96143.6	62230.5	66073	67878.9	49303.7	60497.5	77238.2	63837.2	62978.2	48299.8	33086.3	30807.8	44757.8	47406.1	43700.9	55904.7	35432.4	28138.5	21127.1	43316.6	11404.9	18009.8	22330.3	49889.1
O14880	Microsomal glutathione S-transferase 3 (Microsomal GST-3) (EC 2.5.1.18) (Microsomal GST-III)	MGST3	MGST3	152	4	68483.6	84190.7	116689	113943	80705.1	138844	101771	204861	78370.5	99745.5	105468	98235	168942	166217	147511	84140.3	108077	55962.9	218805	130504	207758	189101	126589	95551.8	95890.5	97082.1	139753	97279.1	99403.8	90383.8	82769	45002	97295.2	77548.2	125685	136918	83322.7	104824	82978.8	77939.4	42377.8	102367	94503.5	174782
O14907	Tax1-binding protein 3 (Glutaminase-interacting protein 3) (Tax interaction protein 1) (TIP-1) (Tax-interacting protein 1)	TAX1BP3	TAX1BP3 TIP1	124	2	118883	162040	174743	174659	107037	188869	157540	154208	126821	136928	218733	166765	164746	238915	165962	142050	185142	126197	159342	153972	174127	153131	158850	160080	146131	151051	168798	152627	141695	124055	150135	107733	173420	155347	150720	178994	128678	144763	187278	119830	50637.8	97269.7	141247	196032
O14908	PDZ domain-containing protein GIPC1 (GAIP C-terminus-interacting protein) (RGS-GAIP-interacting protein) (RGS19-interacting protein 1) (Synectin) (Tax interaction protein 2) (TIP-2)	GIPC1	GIPC1 C19orf3 GIPC RGS19IP1	333	2	484047	766062	703142	723868	557130	677683	804408	881258	613926	691046	718922	776122	898848	711194	840387	504897	578639	644381	659138	824200	678976	521876	525678	613011	621002	593356	855940	575943	593217	496297	443382	687038	644663	657936	673390	580558	558725	646626	633879	460880	316279	535587	764862	588394
O14910	Protein lin-7 homolog A (Lin-7A) (hLin-7) (Mammalian lin-seven protein 1) (MALS-1) (Tax interaction protein 33) (TIP-33) (Vertebrate lin-7 homolog 1) (Veli-1)	LIN7A	LIN7A MALS1 VELI1	233	2	379039	549838	499041	434197	407820	487293	490573	589802	444439	465270	519151	377561	402151	451878	482384	281911	409215	449268	341706	532740	329898	309511	283075	429290	459491	373552	559952	377769	411797	294314	315702	469066	474131	351542	445690	389503	446078	418825	423312	350103	299863	401157	536327	384904
O14920	Inhibitor of nuclear factor kappa-B kinase subunit beta (I-kappa-B-kinase beta) (IKK-B) (IKK-beta) (IkBKB) (EC 2.7.11.10) (I-kappa-B kinase 2) (IKK2) (Nuclear factor NF-kappa-B inhibitor kinase beta) (NFKBIKB)	IKBKB	IKBKB IKKB	756	2	7091.3	8552.31	24068.1	8684.79	11856	10306.2	14417.5	37517.2	14196.1	8186.11	18375.4	21377.4	10158	19254.8	19992.8	18348.1	17911.4	10801.7	37346.1	34769.2	45487.5	18642.1	19555	34524.1	15824.1	33076.8	38950.8	45160.4	45490.2	20850.8	7679.13	6542.55	18958.9	13175	7105.87	18730.4	9972.43	5960.46	15733.7	10710	4553.01	6844.9	9595.93	14957
O14925	Mitochondrial import inner membrane translocase subunit Tim23	TIMM23	TIMM23 TIM23	209	2	19962.3	9504.78	29491.1	9512.98	5887.93	21747.6	23372.8	45185.5	23054.7	15682.2	32234.5	26607.6	8419.77	64638.7	26449.6	29765.4	33529.1	28310.7	33118	44088.7	31583.5	21580	18394.5	35237.9	23813	25650.6	44338.3	32442.6	32731.7	13578.1	13413.5	18250.6	24689	13479	8492.51	11533.6	17407.5	7974.6	24977.4	18950.2	944.03	8048.8	6080.32	36126.5
O14929	Histone acetyltransferase type B catalytic subunit (EC 2.3.1.48) (Histone acetyltransferase 1)	HAT1	HAT1 KAT1	419	2	103203	124940	198970	163963	157604	289579	150650	170849	114434	148995	170215	147094	100724	218174	134334	179387	122038	120628	319714	190952	378768	225535	228084	182312	125244	158913	292193	150077	176977	156632	83089.2	94712.2	167172	129295	166349	208897	125580	85834.3	118260	101073	41371.7	79413.3	123881	153579
O14936	Peripheral plasma membrane protein CASK (hCASK) (EC 2.7.11.1) (Calcium/calmodulin-dependent serine protein kinase) (Protein lin-2 homolog)	CASK	CASK LIN2	926	3	165458	150611	224727	200326	178153	286550	160443	208377	139619	225628	211161	197223	117219	254073	156887	184972	210441	177953	242883	224624	270094	239864	187642	227824	198039	215079	271019	177418	207798	186518	161947	130621	171435	190061	180668	184120	136427	135613	134325	184223	102883	146680	100900	147197
O14949	Cytochrome b-c1 complex subunit 8 (Complex III subunit 8) (Complex III subunit VIII) (Ubiquinol-cytochrome c reductase complex 9.5 kDa protein) (Ubiquinol-cytochrome c reductase complex ubiquinone-binding protein QP-C)	UQCRQ	UQCRQ	82	2	272635	265565	280305	277623	272771	292219	324893	368046	278717	372599	319449	302690	271442	415981	387428	274798	305325	321413	296850	286336	353285	283898	215755	273657	290289	265472	344763	256947	273696	171695	256634	239871	328787	154658	295682	270331	269922	358557	356471	280238	152548	337587	291834	365322
O14958	Calsequestrin-2 (Calsequestrin, cardiac muscle isoform)	CASQ2	CASQ2	399	2	167418	142099	174013	212524	115876	208659	185503	191321	156503	170522	178961	169526	136616	151466	193336	180552	192488	121433	207553	176621	242628	207330	199221	199373	159141	160279	206796	163400	171073	150535	169406	145226	197601	208936	216209	178830	169111	160830	174592	137379	86055.6	125699	107735	221535
O14964	Hepatocyte growth factor-regulated tyrosine kinase substrate (Hrs) (Protein pp110)	HGS	HGS HRS	777	4	48517.2	57311.1	82252.4	73504.7	60894.5	120878	71465.2	84806.9	66943.4	79177.1	87620.4	73620.8	67546.8	92066.7	115602	61593.4	70243.4	61540.1	80444.9	96728.5	98379.6	82211.6	67256.4	91903	72590.5	87006	119314	70399	86378.5	76961.9	54718	52764	81948.4	74072.5	72746.7	67261.9	61201.3	49372.7	62883.5	63512.8	35582.6	58535.5	76410.6	71697
O14965	Aurora kinase A (EC 2.7.11.1) (Aurora 2) (Aurora/IPL1-related kinase 1) (ARK-1) (Aurora-related kinase 1) (hARK1) (Breast tumor-amplified kinase) (Serine/threonine-protein kinase 15) (Serine/threonine-protein kinase 6) (Serine/threonine-protein kinase aurora-A)	AURKA	AURKA AIK AIRK1 ARK1 AURA AYK1 BTAK IAK1 STK15 STK6	403	2	984971	808463	1.05318e+06	1.55156e+06	892824	903384	1.64699e+06	1.27944e+06	1.08518e+06	774853	1.16195e+06	1.28289e+06	830265	1.64444e+06	1.39806e+06	1.27052e+06	1.2578e+06	959852	1.69748e+06	1.41891e+06	1.12139e+06	1.14448e+06	1.54385e+06	1.38511e+06	1.08485e+06	1.12124e+06	1.3403e+06	647586	924349	1.21866e+06	881863	759547	1.00358e+06	1.31932e+06	981659	1.01669e+06	1.24966e+06	972109	1.08068e+06	629643	494819	999131	758660	1.34175e+06
O14972	Down syndrome critical region protein 3 (Down syndrome critical region protein A)	DSCR3	DSCR3 DCRA DSCRA	297	2	451337	840926	900557	390005	454014	468549	796721	750902	595646	497945	608570	471629	852267	406883	635621	309153	424697	542194	280047	785523	323079	248658	184476	463900	288801	391175	737627	405356	311449	263727	364416	747087	799133	227117	502626	391455	587793	664720	704643	405300	241884	435973	912832	369143
O14974	Protein phosphatase 1 regulatory subunit 12A (Myosin phosphatase-targeting subunit 1) (Myosin phosphatase target subunit 1) (Protein phosphatase myosin-binding subunit)	PPP1R12A	PPP1R12A MBS MYPT1	1030	7	618945	1.15855e+06	1.02565e+06	678736	604647	733614	1.03584e+06	1.1559e+06	949148	818386	890870	847712	1.25395e+06	729957	1.10766e+06	553494	593365	981318	503302	1.11698e+06	607935	517661	481195	697043	775629	632837	1.08538e+06	636088	755950	562932	550381	917198	1.07158e+06	632779	636543	561130	810843	996579	914726	674771	502134	713074	1.31058e+06	544830
O14975	Very long-chain acyl-CoA synthetase (VLACS) (VLCS) (EC 6.2.1.-) (Fatty acid transport protein 2) (FATP-2) (Fatty-acid-coenzyme A ligase, very long-chain 1) (Long-chain-fatty-acid--CoA ligase) (EC 6.2.1.3) (Solute carrier family 27 member 2) (THCA-CoA ligase) (Very long-chain-fatty-acid-CoA ligase)	SLC27A2	SLC27A2 ACSVL1 FACVL1 FATP2 VLACS	620	2	38293.3	38266.8	41470.8	56911.2	39222.3	41727.6	56870.7	53023	48350.9	36570.2	48935.4	52297.5	42211.6	60006	57327.6	46251	46703.9	38612.7	61434.3	55701.4	57373.9	35537.9	53550.7	55520.5	31215.5	45818.9	59168.1	32737.5	40294.3	50782.6	30771.7	32263.9	40278.5	55868.6	49113	40930	53395.4	40979.6	42759.2	27316.8	23333.6	37764.7	35352.3	35533.6
O14976	Cyclin-G-associated kinase (EC 2.7.11.1)	GAK	GAK	1311	3	249963	261994	296799	342344	272520	374295	294290	318867	253560	359720	371746	327825	315514	400978	368975	233473	295908	242019	340677	297691	365247	326119	282579	340142	300555	326611	396669	277587	310571	267604	247974	268774	314433	335486	308348	292827	255346	307320	288837	293687	172791	252247	292011	286997
O14979	Heterogeneous nuclear ribonucleoprotein D-like (hnRNP D-like) (hnRNP DL) (AU-rich element RNA-binding factor) (JKT41-binding protein) (Protein laAUF1)	HNRNPDL	HNRNPDL HNRPDL JKTBP	420	9	178332	145234	175084	204720	186082	224522	176542	196096	144673	209718	231515	204480	158751	261105	191600	158725	178727	144950	210249	186734	238025	222645	161125	175125	175348	208047	223216	161519	194909	148432	165835	151113	197386	196746	233916	188141	146484	154532	133140	148774	94762.4	171871	152265	245425
O14980	Exportin-1 (Exp1) (Chromosome region maintenance 1 protein homolog)	XPO1	XPO1 CRM1	1071	4	75911.9	55517.9	87586.3	84739.2	65778	103305	90783.5	92577.1	100062	75647.9	97008.8	101485	74208.6	118935	91506.4	87627.2	117794	93462.8	184145	135713	126479	88911.6	138058	110370	78889.1	81195.7	115288	98031.2	89724.1	75337.8	71881.9	71453.2	74334.5	83646.1	83007.7	76139.6	67435	72882.2	90191.3	69112.6	32729.6	62126.1	71133	95268
O14981	TATA-binding protein-associated factor 172 (EC 3.6.4.-) (ATP-dependent helicase BTAF1) (B-TFIID transcription factor-associated 170 kDa subunit) (TAF(II)170) (TBP-associated factor 172) (TAF-172)	BTAF1	BTAF1 TAF172	1849	2	230224	395044	392670	351728	291044	355245	372166	436980	340878	369570	352293	348419	461942	303043	382347	206533	271775	312661	266405	389625	282532	234186	220235	281458	329059	287970	396761	265124	309059	224823	207285	346965	373570	313521	325251	294914	338358	385421	303689	257662	191812	299890	523378	266834
O15013	Rho guanine nucleotide exchange factor 10	ARHGEF10	ARHGEF10 KIAA0294	1369	2	140705	345146	448714	243217	294522	449685	386454	294377	282989	118471	329697	267692	208333	418168	331474	358152	364833	108361	221663	137531	295424	270662	286153	342700	244388	191950	401953	207138	289695	264988	315211	344094	192450	237442	291314	346503	95725.9	173467	375791	287125	71827.8	264887	292759	308338
O15020	Spectrin beta chain, non-erythrocytic 2 (Beta-III spectrin) (Spinocerebellar ataxia 5 protein)	SPTBN2	SPTBN2 KIAA0302 SCA5	2390	8	304643	395788	393644	361191	310311	405073	410395	431683	340471	377422	371268	412609	383427	412974	421456	270929	315738	351145	346291	430397	372883	327373	266862	348506	352352	351629	451929	321252	379695	251480	268531	361951	357858	346296	376437	332721	301000	372339	360738	295631	191219	273198	415157	335925
O15021	Microtubule-associated serine/threonine-protein kinase 4 (EC 2.7.11.1)	MAST4	MAST4 KIAA0303	2626	2	445741	402457	519566	818971	431561	651454	822212	633364	503567	364053	527871	610705	330825	808850	702791	655426	649881	458227	826047	796117	709219	539798	786740	715133	505130	606272	681007	511497	507822	606180	402857	351604	501192	741851	512537	523887	691604	470900	522923	288831	235373	486712	335622	642399
O15027	Protein transport protein Sec16A (SEC16 homolog A)	SEC16A	SEC16A KIAA0310 SEC16 SEC16L	2179	6	157300	135180	180141	279595	161388	252434	322572	253529	169183	129377	196792	276663	124441	308988	256741	218763	207905	138860	406116	321960	345521	220711	308625	251520	233601	235099	333935	238504	195970	226423	146778	116947	154820	263263	191727	190759	208269	135800	171853	102910	70869.1	164683	104004	242447
O15031	Plexin-B2 (MM1)	PLXNB2	PLXNB2 KIAA0315	1838	4	256121	254772	382783	315344	293362	348226	295051	356284	299798	323117	420204	287754	404692	323534	339781	224089	281158	262076	305503	368590	243337	260278	236658	380831	282087	301455	430748	261003	326484	273794	146904	348530	339285	249064	339572	283862	294130	317744	385421	278030	224981	182436	370739	223407
O15042	U2 snRNP-associated SURP motif-containing protein (140 kDa Ser/Arg-rich domain protein) (U2-associated protein SR140)	U2SURP	U2SURP KIAA0332 SR140	1029	4	110869	94402.9	125201	126936	139175	153831	96842.6	131742	92092.2	137652	126809	130299	92483.6	169619	124005	111207	110375	91439.2	139229	122661	154791	125480	112757	122116	120238	120079	179823	102256	133114	104295	98084.6	90297.9	115816	153957	142637	148760	96157.1	117280	110863	107531	62760.1	95776.1	87977.9	152015
O15049	NEDD4-binding protein 3 (N4BP3)	N4BP3	N4BP3 KIAA0341	544	3	384609	659096	618344	514593	415304	472108	491943	638184	507324	506970	501828	552032	635646	423444	574720	311624	315584	475027	343927	590986	338814	309230	290776	400093	454437	411352	623219	395322	466197	357177	278600	520413	483229	453574	439577	371310	500315	331307	538696	413215	318140	465272	637811	354266
O15056	Synaptojanin-2 (EC 3.1.3.36) (Synaptic inositol 1,4,5-trisphosphate 5-phosphatase 2)	SYNJ2	SYNJ2 KIAA0348	1496	3	310516	517674	403855	381304	321988	396510	363050	527542	370017	466861	453576	511978	571837	402728	535727	294862	376648	471005	331501	508558	351303	277565	276154	319730	420069	361527	561274	354221	401214	333455	255705	460355	478290	325514	373029	324422	354902	402324	431602	339352	295034	354962	537890	329201
O15061	Synemin (Desmuslin)	SYNM	SYNM DMN KIAA0353 SYN	1565	30	351068	701971	563453	420510	313768	433119	673028	809283	569709	547396	607394	558109	841252	417719	576644	293817	392392	527108	358119	909200	405619	315145	310100	489788	451807	405944	757341	450628	513068	348946	316504	715367	588106	395169	409465	345283	543751	604505	509720	427192	279595	453171	798154	342259
O15063	Uncharacterized protein KIAA0355	KIAA0355	KIAA0355	1070	3	635959	1.5616e+06	1.37904e+06	909173	788483	858424	1.43267e+06	1.81444e+06	1.2183e+06	1.26553e+06	1.35785e+06	1.36644e+06	1.79478e+06	618213	1.41455e+06	497129	732367	1.32723e+06	744420	1.86025e+06	805535	589619	637637	1.04575e+06	1.18781e+06	895367	1.75303e+06	1.02689e+06	1.15725e+06	677908	463783	1.55362e+06	1.39042e+06	781701	884524	735320	966053	1.27446e+06	1.09032e+06	806307	488260	881935	1.69126e+06	624880
O15067	Phosphoribosylformylglycinamidine synthase (FGAM synthase) (FGAMS) (EC 6.3.5.3) (Formylglycinamide ribonucleotide amidotransferase) (FGAR amidotransferase) (FGAR-AT) (Formylglycinamide ribotide amidotransferase)	PFAS	PFAS KIAA0361	1338	3	3674.06	8445.48	9902.39	5900.17	7533.6	9277.08	5332.85	10218.3	5539.01	8871.99	10083.8	13477.9	4219.94	12455.6	9188.84	10347.3	6792.93	7293.08	21847.4	20535.3	25463.6	12170.8	18468.5	21782.6	14340.6	18782.5	29378.6	20510.6	25077.7	13206.2	4765.42	5885.25	10357.4	4825.98	3664.66	9265.63	6719.81	4094.4	12729.6	15716.4	2720.89	3810.48	5841.07	8749.84
O15075	Serine/threonine-protein kinase DCLK1 (EC 2.7.11.1) (Doublecortin domain-containing protein 3A) (Doublecortin-like and CAM kinase-like 1) (Doublecortin-like kinase 1)	DCLK1	DCLK1 DCAMKL1 DCDC3A KIAA0369	740	2	276980	371369	446049	320599	285749	365353	397798	446578	256522	367009	380001	377599	443732	438534	396985	331239	301021	367774	342435	327803	314021	257367	255192	342562	325975	273762	488208	295214	399326	257516	312800	431988	389794	294094	344083	341747	204180	320148	347090	267839	141890	296752	355753	365345
O15084	Serine/threonine-protein phosphatase 6 regulatory ankyrin repeat subunit A (PP6-ARS-A) (Serine/threonine-protein phosphatase 6 regulatory subunit ARS-A) (Ankyrin repeat domain-containing protein 28) (Phosphatase interactor targeting protein hnRNP K) (PITK)	ANKRD28	ANKRD28 KIAA0379	1053	2	188631	374678	462021	451294	181579	339407	390136	631510	408177	343315	445849	390504	582300	308682	415654	201761	368079	349612	163237	684601	262410	291610	184783	426946	327020	300647	486022	297952	376481	198540	149579	602418	416899	225696	262322	263164	327233	370314	558834	247003	95417.4	186573	467774	223201
O15111	Inhibitor of nuclear factor kappa-B kinase subunit alpha (I-kappa-B kinase alpha) (IKK-A) (IKK-alpha) (IkBKA) (IkappaB kinase) (EC 2.7.11.10) (Conserved helix-loop-helix ubiquitous kinase) (I-kappa-B kinase 1) (IKK1) (Nuclear factor NF-kappa-B inhibitor kinase alpha) (NFKBIKA) (Transcription factor 16) (TCF-16)	CHUK	CHUK IKKA TCF16	745	2	2.42703e+06	4.71523e+06	3.72856e+06	3.27123e+06	2.656e+06	3.05329e+06	3.77472e+06	4.15964e+06	3.20434e+06	3.33156e+06	3.54386e+06	3.72218e+06	3.83434e+06	7.40421e+06	3.43948e+06	2.12805e+06	2.8964e+06	3.71615e+06	2.95594e+06	2.86473e+06	2.95298e+06	2.04962e+06	2.35344e+06	3.16212e+06	3.85002e+06	3.09229e+06	2.77876e+06	2.6564e+06	2.66146e+06	2.65538e+06	2.79674e+06	3.65007e+06	4.05998e+06	3.00329e+06	3.33651e+06	2.86666e+06	3.34415e+06	4.42643e+06	3.36087e+06	2.93847e+06	2.26525e+06	3.0516e+06	4.68078e+06	3.86969e+06
O15118	NPC intracellular cholesterol transporter 1 (Niemann-Pick C1 protein)	NPC1	NPC1	1278	2	533226	822263	464363	535432	457256	593365	649307	844551	767924	653311	678503	664863	817400	678965	888699	473345	621949	765275	478951	900734	627551	473215	437190	595490	650259	618189	1.01959e+06	608926	679573	453319	380808	800369	692059	497573	582686	518360	582472	631771	698357	515036	331809	521081	768200	622358
O15126	Secretory carrier-associated membrane protein 1 (Secretory carrier membrane protein 1)	SCAMP1	SCAMP1 SCAMP	338	2	197009	188749	252896	302225	154658	303892	363637	322562	259616	249064	274212	220397	209423	343091	313083	235011	260621	222933	265901	243276	271061	228239	218623	238535	264786	270826	228600	213212	224535	205152	195260	190045	246234	266652	269310	251796	275207	290996	280538	184345	118612	218508	232761	313304
O15127	Secretory carrier-associated membrane protein 2 (Secretory carrier membrane protein 2)	SCAMP2	SCAMP2	329	2	338544	395825	123722	80477.5	270180	349454	350379	322301	238143	320554	282103	285844	293453	364133	381521	226628	220917	248548	235968	323725	267974	220310	185436	275260	251803	276626	455861	268341	290851	263204	456044	360065	558832	366918	403494	379948	347986	289105	407933	335342	194367	311532	370168	415184
O15143	Actin-related protein 2/3 complex subunit 1B (Arp2/3 complex 41 kDa subunit) (p41-ARC)	ARPC1B	ARPC1B ARC41	372	4	193226	174527	216726	161892	145336	186520	186957	192077	169196	179575	162406	222775	155609	259323	217171	144415	209617	118491	164260	169565	176281	147868	115127	195905	147259	154114	232094	127754	172861	125167	176520	154824	194768	176714	167090	160258	143174	174585	186095	121206	106426	144653	182095	193563
O15144	Actin-related protein 2/3 complex subunit 2 (Arp2/3 complex 34 kDa subunit) (p34-ARC)	ARPC2	ARPC2 ARC34 PRO2446	300	7	265892	183753	265131	268226	227148	281609	230633	227729	198476	278305	269569	227153	218738	337684	307407	218217	272823	172578	227482	215944	243358	225461	182402	231292	224033	231765	310281	198694	235137	202959	260690	185691	242201	258038	223062	214147	194358	174666	213667	222072	126553	184782	177314	264527
O15145	Actin-related protein 2/3 complex subunit 3 (Arp2/3 complex 21 kDa subunit) (p21-ARC)	ARPC3	ARPC3 ARC21	178	8	140766	128263	196936	161758	133537	210332	147305	182895	135189	160834	153933	143248	134837	229834	200622	152324	164104	107660	164474	187031	171144	160999	125289	230344	143751	165844	210852	139626	150703	125409	172461	111456	165640	143963	141734	151812	115596	123947	129599	142833	71689.3	96851.4	105998	163130
O15164	Transcription intermediary factor 1-alpha (TIF1-alpha) (EC 2.3.2.27) (E3 ubiquitin-protein ligase TRIM24) (RING finger protein 82) (RING-type E3 ubiquitin transferase TIF1-alpha) (Tripartite motif-containing protein 24)	TRIM24	TRIM24 RNF82 TIF1 TIF1A	1050	2	67545	82276.9	68830.8	92156.5	94622	162925	99400.6	150751	81320.8	92836.8	80290.8	76202.4	87547.8	125758	107089	65238.6	84166.6	83734	100653	84030.4	103618	100121	92319.9	100804	83432	102439	104548	67921.1	102333	59458.1	71917	87469.3	111249	65815.6	122955	128150	67838.6	68988	84056.7	36241.1	40650.7	63792.5	79690	101755
O15195	Villin-like protein	VILL	VILL	856	2	258513	253812	233759	258071	293940	386591	265489	247875	240298	326050	202597	192058	240495	408882	394473	306691	317626	233451	280327	225574	288789	234195	179893	209118	185539	137198	293649	172081	203366	211597	368586	296871	284983	320158	362118	360166	255849	291900	353086	287780	172377	188747	167779	384462
O15211	Ral guanine nucleotide dissociation stimulator-like 2 (RalGDS-like 2) (RalGDS-like factor) (Ras-associated protein RAB2L)	RGL2	RGL2 RAB2L	777	3	141816	232957	248658	393464	199762	384034	493282	595196	402841	325396	455557	476730	247338	477310	452560	216821	224833	266227	325674	564129	454717	171143	265079	319166	336828	255039	611872	311843	331052	233324	141252	200320	215910	426864	196116	192291	269426	247501	343333	220468	100118	247070	246260	232337
O15212	Prefoldin subunit 6 (Protein Ke2)	PFDN6	PFDN6 HKE2 PFD6	129	4	285902	396597	340928	286659	285124	326200	358857	392420	296802	317821	346610	278048	358009	377707	388196	287610	313714	308157	272772	345873	238282	256001	191062	285810	275012	254819	401013	242899	251740	225558	286136	368785	377050	255161	355965	294548	272700	401713	376132	241187	155625	272907	387919	325025
O15226	NF-kappa-B-repressing factor (NFkB-repressing factor) (Protein ITBA4) (Transcription factor NRF)	NKRF	NKRF ITBA4 NRF	690	2	234144	200514	342176	321397	268765	455699	254229	264784	217182	286970	316570	243783	303799	367748	353719	299339	216045	220621	420351	289582	468716	326510	323803	312327	249807	345758	382854	255165	234568	299367	183191	160570	393394	361546	373327	363199	182414	203403	324594	216444	185608	173953	181699	303945
O15228	Dihydroxyacetone phosphate acyltransferase (DAP-AT) (DHAP-AT) (EC 2.3.1.42) (Acyl-CoA:dihydroxyacetonephosphateacyltransferase) (Glycerone-phosphate O-acyltransferase)	GNPAT	GNPAT DAPAT DHAPAT	680	2	11312.7	16426.7	12357.4	9243.12	9517.8	12810.1	12426.5	14253.9	8727.54	10143.7	14142.2	5044.82	10530.2	61111.7	10940.3	11527.6	36531.2	9874.48	113778	18749.3	140819	38310.6	112704	58071.9	22677.5	42773.8	73961.6	39412	36649.7	36969.3	19686.6	7899.12	15069.2	17543.1	9416.11	37320.1	7038.17	5470.38	13871.4	10720.7	4172.69	17327.5	11344.2	22701.8
O15230	Laminin subunit alpha-5 (Laminin-10 subunit alpha) (Laminin-11 subunit alpha) (Laminin-15 subunit alpha)	LAMA5	LAMA5 KIAA0533 KIAA1907	3695	6	192320	216347	223365	214093	200424	259156	273588	280090	205937	231998	247924	278591	222853	275764	277542	233614	257620	198757	259971	215162	257729	223379	241670	246805	218081	264193	282111	198717	217427	199293	171898	192611	226612	274312	266534	202553	212027	239760	233631	171404	132985	224385	200050	240041
O15231	Zinc finger protein 185 (LIM domain protein ZNF185) (P1-A)	ZNF185	ZNF185	689	4	105617	101326	119122	111741	108310	144439	134071	135456	93829.6	160821	124772	164680	137767	135250	195560	108174	82509.3	84846.7	98619.6	131330	119779	97140.8	59021.7	122218	117078	108151	166871	115809	130816	81114.3	98175	89306.2	96983	91262.3	104354	100096	86976.8	98869.2	88759.5	87801.1	69085	102448	136903	108645
O15254	Peroxisomal acyl-coenzyme A oxidase 3 (EC 1.3.3.6) (Branched-chain acyl-CoA oxidase) (BRCACox) (Pristanoyl-CoA oxidase)	ACOX3	ACOX3 BRCOX PRCOX	700	4	54934.7	40286.3	52636.2	55382.6	44139.6	70139.3	47828.5	73448.9	33694.9	49206	57425.9	55190.1	27663.8	77923.5	46310.9	45001.3	42546.6	42911.7	116034	84581	148383	83337.4	78139.7	71001.2	56760.9	88605.4	98469.1	76504	88695.1	44474.2	49026.7	37251.6	50306.3	43137.6	45432.8	57257.4	34279.3	30341	49145.9	36970.8	17063.7	26634.4	32060.9	45368.1
O15260	Surfeit locus protein 4	SURF4	SURF4 SURF-4	269	3	102271	77761.5	105334	152765	127777	149693	125298	149804	93051.9	91638	127097	129108	76178.5	191906	203940	109967	126008	108194	276989	142761	260216	165709	166085	153319	144227	137505	174147	122738	136020	110238	68409.4	80006.3	92537	119269	119739	125013	100832	88891	100169	85809.7	46446.3	71291.1	100185	138081
O15294	UDP-N-acetylglucosamine--peptide N-acetylglucosaminyltransferase 110 kDa subunit (EC 2.4.1.255) (O-GlcNAc transferase subunit p110) (O-linked N-acetylglucosamine transferase 110 kDa subunit) (OGT)	OGT	OGT	1046	5	355633	482962	491173	441154	312074	444847	521820	677623	409360	507745	515873	475679	547897	527075	622390	315796	376812	456068	460036	587661	495166	377510	346332	465161	406205	368171	697998	377273	485594	318761	423862	470486	487069	449033	444730	409805	374184	456506	476513	389198	218475	343731	562104	398614
O15296	Arachidonate 15-lipoxygenase B (15-LOX-B) (EC 1.13.11.33) (15-lipoxygenase 2) (15-LOX-2) (Arachidonate 15-lipoxygenase type II) (Linoleate 13-lipoxygenase 15-LOb) (EC 1.13.11.-)	ALOX15B	ALOX15B	676	5	76145.9	68685.4	125296	71626.3	107555	119816	90365.8	106164	85312.8	107840	118352	94490.2	113858	156702	107287	102271	89404.2	74106.9	170342	109095	166671	134132	109025	123155	135351	146134	157574	127155	138979	106319	83455.7	80108.5	100749	85810.6	117125	81741	72422.9	82030.2	85390.2	107419	71734.7	65159	124448	109772
O15305	Phosphomannomutase 2 (PMM 2) (EC 5.4.2.8)	PMM2	PMM2	246	3	259907	274159	292208	299386	236353	312462	283804	325582	272151	330322	316863	289076	252345	335378	299407	262510	258310	273641	272797	321767	269078	267164	186797	253910	225764	243641	339825	202662	276016	188742	253571	254122	305834	251666	274506	256022	220992	277756	271085	251227	140865	231943	323249	266547
O15347	High mobility group protein B3 (High mobility group protein 2a) (HMG-2a) (High mobility group protein 4) (HMG-4)	HMGB3	HMGB3 HMG2A HMG4	200	3	199234	149898	238248	218305	169461	282681	184093	176365	163066	222146	169790	240731	135596	292269	231060	200302	229286	159179	333481	191703	330074	291724	237612	315301	213065	251258	281303	191995	222098	190814	205819	126036	218751	188611	238383	260313	143654	159770	175513	160856	110621	151321	209352	263649
O15355	Protein phosphatase 1G (EC 3.1.3.16) (Protein phosphatase 1C) (Protein phosphatase 2C isoform gamma) (PP2C-gamma) (Protein phosphatase magnesium-dependent 1 gamma)	PPM1G	PPM1G PPM1C	546	5	151181	171177	359115	327243	240079	377255	285073	212950	379173	339465	451352	249809	147944	347398	167169	186473	202653	108697	505616	199488	418919	488923	310222	241005	319782	398476	542559	356788	468125	450052	144161	101535	337594	257523	287948	288901	163023	294276	301713	176818	238039	204638	154422	255532
O15357	Phosphatidylinositol 3,4,5-trisphosphate 5-phosphatase 2 (EC 3.1.3.86) (Inositol polyphosphate phosphatase-like protein 1) (INPPL-1) (Protein 51C) (SH2 domain-containing inositol 5'-phosphatase 2) (SH2 domain-containing inositol phosphatase 2) (SHIP-2)	INPPL1	INPPL1 SHIP2	1258	2	421414	327486	373773	344159	370959	432857	355712	513045	332561	370611	395811	367357	397783	309870	447409	321031	403575	329241	427921	396537	488871	381184	312448	358624	379150	345885	466963	326860	400398	298478	355057	295497	371423	311789	449083	328926	286091	339101	353613	297229	200912	315367	364500	486635
O15371	Eukaryotic translation initiation factor 3 subunit D (eIF3d) (Eukaryotic translation initiation factor 3 subunit 7) (eIF-3-zeta) (eIF3 p66)	EIF3D	EIF3D EIF3S7	548	4	196172	150678	221530	313215	195451	268251	270981	264605	209967	204162	228734	248645	218792	379393	325349	268784	263149	199691	255810	257443	295224	275546	301874	271883	231504	273893	310041	267268	259138	172492	218442	181490	237586	267376	279853	249282	226953	258672	248883	158341	113024	209190	204215	286368
O15372	Eukaryotic translation initiation factor 3 subunit H (eIF3h) (Eukaryotic translation initiation factor 3 subunit 3) (eIF-3-gamma) (eIF3 p40 subunit)	EIF3H	EIF3H EIF3S3	352	4	192366	176749	247023	269281	195865	357892	257084	286308	235599	260587	293412	227534	190607	366045	281046	238973	265350	210956	321492	243975	308859	270950	271533	266111	240057	284902	300873	246167	289492	219259	232421	169325	282661	277768	300680	283079	158354	202660	221193	179366	141629	172122	257123	324606
O15381	Nuclear valosin-containing protein-like (NVLp) (Nuclear VCP-like protein)	NVL	NVL	856	3	338736	218879	314230	250137	212439	271506	317311	319748	241683	282368	260220	250169	382972	418322	372348	291892	287707	306570	294157	356448	270828	276057	161426	319515	223613	269825	387684	226801	252291	188815	277179	319751	323946	228560	257834	256714	261254	292410	324698	258619	194276	229505	355952	304279
O15382	Branched-chain-amino-acid aminotransferase, mitochondrial (BCAT(m)) (EC 2.6.1.42) (Placental protein 18) (PP18)	BCAT2	BCAT2 BCATM BCT2 ECA40	392	4	149531	235473	227349	177461	133640	194366	191649	242684	171434	185808	203791	200992	213538	153029	207521	120160	122998	141609	197460	285011	205536	163385	147416	192039	204713	176852	266393	176946	216381	144339	121029	213930	214939	156869	150880	149130	157825	165327	167556	141991	90345.7	135554	222322	143974
O15393	Transmembrane protease serine 2 (EC 3.4.21.-) (Serine protease 10) [Cleaved into: Transmembrane protease serine 2 non-catalytic chain; Transmembrane protease serine 2 catalytic chain]	TMPRSS2	TMPRSS2 PRSS10	492	4	66416.8	88468.9	198391	169250	129886	205495	181961	140533	179922	239532	231049	197015	114865	220671	134675	179708	172854	110304	313100	178408	343026	296243	220516	197533	86792.7	183614	170238	144446	185968	132342	85478.8	107468	202017	186794	151961	172494	189530	147321	199175	110071	123766	174064	89640.8	236632
O15394	Neural cell adhesion molecule 2 (N-CAM-2) (NCAM-2)	NCAM2	NCAM2 NCAM21	837	2	91766.4	150705	81035.2	229806	142231	145771	185284	286237	161716	165458	170370	221592	295641	148038	237702	104731	96449.6	177466	92782.5	139987	121318	90920.8	68822.6	84789.8	166827	152831	183178	135442	130411	82201.2	86036.2	132483	114938	179356	165818	90740.1	127536	168011	127235	127554	57730.8	139506	217352	67266.7
O15400	Syntaxin-7	STX7	STX7	261	2	56593.9	43135.5	46164.2	58867.1	52972.4	73723.8	69917.9	92904.1	80306.8	38240.8	45660.3	45539.4	81998	89427.1	94845.5	57665.9	58712.3	59126.5	66147.8	53742.4	78589.4	45394	50808.5	46596.3	54046.9	60759.3	75604.7	36219.7	46737.7	46662.4	58117.8	41717	48714	40856.2	73812.8	48640.3	43967.8	59370.3	83955.7	30106.9	24704.6	46697.8	76125.4	65976.7
O15439	Multidrug resistance-associated protein 4 (ATP-binding cassette sub-family C member 4) (MRP/cMOAT-related ABC transporter) (Multi-specific organic anion transporter B) (MOAT-B)	ABCC4	ABCC4 MRP4	1325	5	27493.1	22275.7	45590.7	30701.2	36656.3	61182.2	51101.3	38350.9	22812.9	33174	34126.2	24512.9	20593.4	52572.7	33688.5	34034.9	30467.1	18599.4	67003.8	36088.6	64037.5	55621.8	38700.3	47428.9	32062.4	38406.7	50434.6	42598.4	43802.6	24051.4	26953.4	33929.3	34524.1	36295.3	44561.8	34230.5	32579.9	34244.2	28126.5	27327.2	17152.7	18245.5	29288.6	45003.8
O15446	DNA-directed RNA polymerase I subunit RPA34 (A34.5) (Antisense to ERCC-1 protein) (ASE-1) (CD3-epsilon-associated protein) (CAST) (CD3E-associated protein) (RNA polymerase I-associated factor PAF49)	CD3EAP	CD3EAP ASE1 CAST PAF49	510	2	296618	228002	299978	219457	217869	317269	267013	290753	263056	283192	302511	255909	245908	319639	294178	247186	262633	247502	255898	264865	244094	234024	214174	238157	247926	269180	330589	178163	260816	200758	286554	272327	264741	252458	268336	241572	231955	296885	323373	237222	246602	265147	215344	284683
O15484	Calpain-5 (EC 3.4.22.-) (Calpain htra-3) (New calpain 3) (nCL-3)	CAPN5	CAPN5 NCL3	640	2	87248.1	114195	132570	128570	82462.6	144118	122606	179184	70339.8	120785	142223	123505	174943	133337	93176.4	72895	129030	105855	116565	203154	163457	96000.2	103778	125500	93832.8	97815.2	141039	72541.1	115128	68907.4	103866	101234	158800	107910	115051	111982	107174	144224	120624	103218	53963.4	66020.6	152230	125359
O15498	Synaptobrevin homolog YKT6 (EC 2.3.1.-)	YKT6	YKT6	198	3	695639	1.19987e+06	1.08799e+06	815552	684994	818930	1.05729e+06	1.32236e+06	897011	935995	1.0101e+06	955375	1.14277e+06	914468	1.18051e+06	570715	755874	960116	761159	1.20024e+06	843831	826041	595665	809238	875394	752732	1.27604e+06	829782	914598	600304	624592	973690	879997	741628	814154	705000	751421	990179	833947	690406	435037	675554	1.12087e+06	814597
O15511	Actin-related protein 2/3 complex subunit 5 (Arp2/3 complex 16 kDa subunit) (p16-ARC)	ARPC5	ARPC5 ARC16	151	2	439407	348867	485317	435228	358293	511057	350106	374270	304743	432863	351250	352509	331354	578878	516922	354258	340780	266100	363388	360535	395617	370567	300698	387244	324231	371395	445201	342009	390443	359623	408085	336362	515591	452765	442957	460726	333482	290097	337763	346890	185547	304702	319037	498412
O15514	DNA-directed RNA polymerase II subunit RPB4 (RNA polymerase II subunit B4) (DNA-directed RNA polymerase II subunit D) (RNA polymerase II 16 kDa subunit) (RPB16)	POLR2D	POLR2D	142	2	162743	166323	189764	160011	141600	187487	185956	191811	157098	149808	182435	120292	165037	224608	199933	148111	106054	194442	137590	194760	157439	139322	134135	159795	142028	143442	253476	136329	137611	125277	138336	131227	186866	185114	153891	149156	210729	134251	166906	160291	66475.4	144040	163871	187856
O15523	ATP-dependent RNA helicase DDX3Y (EC 3.6.4.13) (DEAD box protein 3, Y-chromosomal)	DDX3Y	DDX3Y DBY	660	2	428354	418133	469510	253292	371393	385651	497857	557996	454901	532735	164798	573551	420262	317648	512126	367081	429200	463685	356320	573816	448814	416251	457339	507173	361128	302256	695083	379566	451938	333150	386816	391278	620819	492065	521804	510626	410435	586076	588417	134152	348146	521389	490452	424941
O15530	3-phosphoinositide-dependent protein kinase 1 (hPDK1) (EC 2.7.11.1)	PDPK1	PDPK1 PDK1	556	2	1.13468e+06	896164	694599	502386	429106	592911	768688	945783	776725	794543	769176	793767	698963	1.05075e+06	977817	881867	1.00675e+06	1.03155e+06	536680	822117	563898	455044	464682	556218	679122	553778	779828	544154	570484	415311	1.01091e+06	859727	603867	436606	580164	591054	588960	777286	913443	528331	352770	593554	730082	995436
O15551	Claudin-3 (Clostridium perfringens enterotoxin receptor 2) (CPE-R 2) (CPE-receptor 2) (Rat ventral prostate.1 protein homolog) (hRVP1)	CLDN3	CLDN3 C7orf1 CPETR2	220	2	306455	197153	249124	185375	154366	244766	234694	249607	231945	185256	160450	204045	181352	245636	206590	211100	124962	201560	197912	214452	171993	137227	163557	186907	187040	206047	259306	146883	214762	143260	279338	216498	250133	228024	289962	206643	208205	149116	335010	128418	260205	231411	181850	233654
O43143	Pre-mRNA-splicing factor ATP-dependent RNA helicase DHX15 (EC 3.6.4.13) (ATP-dependent RNA helicase #46) (DEAH box protein 15)	DHX15	DHX15 DBP1 DDX15	795	13	261615	229039	291038	372977	268722	403882	360912	341457	276039	272552	327869	314330	225543	428893	366232	315356	311914	237915	442976	341262	461360	352773	372641	385060	303474	350038	407012	299430	318179	310001	241142	200601	284726	359873	316701	312412	273644	235320	259918	222254	136720	248419	203754	338162
O43148	mRNA cap guanine-N7 methyltransferase (EC 2.1.1.56) (RG7MT1) (mRNA (guanine-N(7)-)-methyltransferase) (mRNA cap methyltransferase) (hCMT1) (hMet) (hcm1p)	RNMT	RNMT KIAA0398	476	2	509306	367116	417968	524904	405419	489666	351697	560793	358924	421586	430808	500252	391608	572839	456550	458260	427869	390542	457197	492537	519289	510475	350714	447274	421801	520549	484189	350813	431135	344718	391145	288584	504921	422032	534783	514910	348270	481696	483457	390083	310995	456195	428255	483712
O43149	Zinc finger ZZ-type and EF-hand domain-containing protein 1	ZZEF1	ZZEF1 KIAA0399	2961	2	630979	364464	783556	704469	658383	825892	692305	669907	720620	862178	1.01926e+06	771423	378597	836098	669608	531982	575076	521866	938361	787368	981257	987341	654338	729263	773127	678320	748234	574085	732561	607917	589501	407925	727411	649693	688811	748580	523325	477328	500799	706791	460212	567945	476185	763994
O43156	TELO2-interacting protein 1 homolog (Protein SMG10)	TTI1	TTI1 KIAA0406 SMG10	1089	4	9653.42	7234.89	14494.7	8956.5	8022.34	10105.8	10421.7	11825.4	9146.93	8531.96	10019.5	8979.4	6894.59	11782.3	14046.2	11022.2	9116.62	7310.29	16960.6	15406.3	24756.6	9225.84	14063.7	18924.7	11152.7	9582.88	18222	18054.6	14444.7	12328	9299.12	6802.24	11857.4	10415.4	8336.86	9220.61	9563.37	5399.68	12059.9	7841.55	5859.48	9531.33	7376.39	9974.1
O43175	D-3-phosphoglycerate dehydrogenase (3-PGDH) (EC 1.1.1.95) (2-oxoglutarate reductase) (EC 1.1.1.399) (Malate dehydrogenase) (EC 1.1.1.37)	PHGDH	PHGDH PGDH3	533	10	149899	106373	239242	322929	261372	335121	164752	217398	146867	226318	240773	143938	117458	439596	196497	197854	240892	99649.6	274140	181212	243197	304047	186735	219704	161834	177536	223641	163570	166914	131197	125981	94863.9	241646	318642	300574	268832	137426	152417	135035	164546	100157	118682	134244	320260
O43181	NADH dehydrogenase [ubiquinone] iron-sulfur protein 4, mitochondrial (Complex I-18 kDa) (CI-18 kDa) (Complex I-AQDQ) (CI-AQDQ) (NADH-ubiquinone oxidoreductase 18 kDa subunit)	NDUFS4	NDUFS4	175	2	135949	215684	160088	184394	167755	247868	125527	135632	101922	178198	161485	140137	128324	184895	148138	142942	133900	138014	213205	149253	231279	194623	174653	196159	152098	166040	195355	162315	125530	148652	136793	98614.5	168364	190139	204077	204511	103794	238711	118842	129703	69002.4	102645	147339	175523
O43182	Rho GTPase-activating protein 6 (Rho-type GTPase-activating protein 6) (Rho-type GTPase-activating protein RhoGAPX-1)	ARHGAP6	ARHGAP6 RHOGAP6	974	4	153958	112265	243797	216168	163976	283101	233351	242949	147287	157386	195135	134212	107555	384108	228453	189133	222845	143684	238888	169636	308599	228750	215703	197661	193293	239441	266715	187646	224633	161298	117448	137626	180431	188961	166727	184077	144240	92920	190521	132794	68065.4	101712	198427	238079
O43237	Cytoplasmic dynein 1 light intermediate chain 2 (Dynein light intermediate chain 2, cytosolic) (LIC-2) (LIC53/55)	DYNC1LI2	DYNC1LI2 DNCLI2 LIC2	492	2	226363	178186	220455	229326	219008	345199	277619	298765	216166	213025	289186	264279	139870	391007	304913	279114	273508	208398	290125	278153	297311	285571	225822	279474	228252	237372	314753	214725	253131	218993	215963	208430	254225	284264	292100	298552	233725	241334	243381	214696	121325	219576	234054	309170
O43242	26S proteasome non-ATPase regulatory subunit 3 (26S proteasome regulatory subunit RPN3) (26S proteasome regulatory subunit S3) (Proteasome subunit p58)	PSMD3	PSMD3	534	4	254046	362047	446934	313800	304831	372465	336686	425118	317714	354901	357605	335097	428858	435695	423340	268977	308771	330986	331783	447922	374785	298526	279501	360739	342266	317191	506790	303701	371745	256512	255964	363145	384397	314271	306197	309192	288049	355564	340008	270030	172231	270132	453607	319291
O43252	Bifunctional 3'-phosphoadenosine 5'-phosphosulfate synthase 1 (PAPS synthase 1) (PAPSS 1) (Sulfurylase kinase 1) (SK 1) (SK1) [Includes: Sulfate adenylyltransferase (EC 2.7.7.4) (ATP-sulfurylase) (Sulfate adenylate transferase) (SAT); Adenylyl-sulfate kinase (EC 2.7.1.25) (3'-phosphoadenosine-5'-phosphosulfate synthase) (APS kinase) (Adenosine-5'-phosphosulfate 3'-phosphotransferase) (Adenylylsul…	PAPSS1	PAPSS1 ATPSK1 PAPSS	624	4	6633.98	5195.75	9161.48	6126.55	6833.99	9893.66	11022.7	7114.72	8776.57	6606.69	8716.44	8473.93	7089.57	10715.1	13230.5	6649.82	6666.84	6564.47	16358	16761.6	20503.9	13456.2	8504.53	14291.5	11203.1	7458.42	18248.2	9087.2	14161.3	8117.33	5216.54	7487.05	8134.08	6937.83	5804.23	9041.73	6387.13	8491.3	5698.39	7847.39	3179.94	5017.94	9060.81	11496.3
O43264	Centromere/kinetochore protein zw10 homolog	ZW10	ZW10	779	2	325620	293309	366829	401653	333730	439811	395171	417140	291420	404389	421036	442587	315969	474487	370042	328846	350526	291385	382584	379003	406635	394613	328627	346417	271925	373003	473869	336883	312249	291875	287831	304896	397676	353272	385929	356662	317236	324609	367544	319837	257848	360259	380365	392840
O43290	U4/U6.U5 tri-snRNP-associated protein 1 (SNU66 homolog) (hSnu66) (Squamous cell carcinoma antigen recognized by T-cells 1) (SART-1) (hSART-1) (U4/U6.U5 tri-snRNP-associated 110 kDa protein) (allergen Hom s 1)	SART1	SART1	800	3	399474	500993	554000	511874	405046	514104	598040	678819	490193	542644	571591	509374	653230	593960	621760	417344	471470	553580	508579	561697	497729	417047	365850	483419	417568	461872	602701	414684	428376	367764	403848	486611	599751	427758	536773	480304	381582	619184	581668	432049	304660	415827	649060	512852
O43294	Transforming growth factor beta-1-induced transcript 1 protein (Androgen receptor coactivator 55 kDa protein) (Androgen receptor-associated protein of 55 kDa) (Hydrogen peroxide-inducible clone 5 protein) (Hic-5)	TGFB1I1	TGFB1I1 ARA55	461	10	174827	370556	310596	226864	178172	246225	296657	382372	263629	261337	285077	271357	380147	187157	307963	131200	199226	285506	198391	348112	201639	167368	170699	240805	249523	222651	355436	214033	258510	177853	121507	333853	295995	210596	212083	183102	243983	277425	248662	194143	119238	191244	359567	148789
O43300	Leucine-rich repeat transmembrane neuronal protein 2 (Leucine-rich repeat neuronal 2 protein)	LRRTM2	LRRTM2 KIAA0416 LRRN2	516	2	192400	309208	240190	144601	166080	240047	217296	248548	176316	172669	173508	195088	228661	186927	263893	153150	197896	260338	167164	280451	146493	144132	108195	189282	153193	152016	286483	101019	185883	93766.6	179747	273418	270241	123491	197865	183475	168878	206393	261274	125265	77206.9	153496	254192	141623
O43301	Heat shock 70 kDa protein 12A	HSPA12A	HSPA12A KIAA0417	675	3	268293	591152	523082	447286	309015	462542	532995	553849	381921	492461	509846	477743	623653	376400	596067	258507	360080	431180	381257	660464	428610	354924	275423	403822	463005	388803	696441	414834	474945	352252	233161	533224	495397	383628	327869	326176	438527	408201	397243	356250	195084	347300	599698	246366
O43314	Inositol hexakisphosphate and diphosphoinositol-pentakisphosphate kinase 2 (EC 2.7.4.21) (EC 2.7.4.24) (Diphosphoinositol pentakisphosphate kinase 2) (Histidine acid phosphatase domain-containing protein 1) (InsP6 and PP-IP5 kinase 2) (VIP1 homolog 2) (hsVIP2)	PPIP5K2	PPIP5K2 HISPPD1 KIAA0433 VIP2	1243	2	250863	290817	279280	168857	144366	175665	214508	297437	211960	213760	227821	162169	299304	286138	334448	180625	242310	296142	185101	243289	136097	140976	137863	173727	170597	169185	256511	148066	165759	102745	247894	262272	234230	131620	140265	148263	242712	263803	229432	156523	84055.8	181654	287758	218248
O43318	Mitogen-activated protein kinase kinase kinase 7 (EC 2.7.11.25) (Transforming growth factor-beta-activated kinase 1) (TGF-beta-activated kinase 1)	MAP3K7	MAP3K7 TAK1	606	2	135489	190833	158878	209476	156433	227159	185716	178073	135745	157679	186959	226581	204169	245796	177876	171686	142299	144509	198519	155775	219330	220665	164531	135115	201133	200510	253555	103323	212390	185761	134619	145663	166845	211650	228225	194531	132400	188077	158378	124640	89167.6	119910	211796	192324
O43324	Eukaryotic translation elongation factor 1 epsilon-1 (Aminoacyl tRNA synthetase complex-interacting multifunctional protein 3) (Elongation factor p18) (Multisynthase complex auxiliary component p18)	EEF1E1	EEF1E1 AIMP3 P18	174	2	149794	150398	219189	220791	215190	279785	149244	178319	138281	179148	168347	154414	136717	282494	159175	160714	148620	119714	178298	155805	221970	187918	160823	195308	143842	188826	219726	173050	206094	152028	174607	123799	189284	186832	216601	201993	124570	172900	163109	147384	75740.6	113132	182586	194311
O43379	WD repeat-containing protein 62	WDR62	WDR62 C19orf14	1518	5	309589	273715	291776	309616	256826	377977	301705	311937	219020	262675	268969	355847	298471	443150	460790	262300	267462	302215	368932	348835	410725	324984	292980	298632	283837	320330	362201	254334	306318	243117	216006	203316	298950	398426	269422	304568	246136	246619	306284	197728	189649	326534	219579	354132
O43390	Heterogeneous nuclear ribonucleoprotein R (hnRNP R)	HNRNPR	HNRNPR HNRPR	633	11	155235	111475	207067	218667	192764	289756	192061	224847	151556	170828	198697	198926	113654	315347	162826	182166	180857	132292	304239	169259	374141	288337	225252	205672	203687	276808	274477	205565	241194	187447	135042	118364	202015	213048	217934	228852	153875	162733	164009	146611	83402.5	129284	121451	246730
O43395	U4/U6 small nuclear ribonucleoprotein Prp3 (Pre-mRNA-splicing factor 3) (hPrp3) (U4/U6 snRNP 90 kDa protein)	PRPF3	PRPF3 HPRP3 PRP3	683	2	118933	211985	188606	173075	95902.7	150472	246210	244197	57990.7	192363	213231	189325	253380	145739	230656	150020	152423	174345	155473	354794	206309	90564	124998	210421	179925	127010	253744	175471	173512	135323	118505	238546	224350	157009	150489	157019	223628	276987	242474	136144	81464.1	189153	243786	173440
O43396	Thioredoxin-like protein 1 (32 kDa thioredoxin-related protein)	TXNL1	TXNL1 TRP32 TXL TXNL	289	6	215617	239012	263325	198895	210852	251379	235054	283518	132962	261938	217547	237818	249425	305879	273618	206575	249009	210875	222499	244088	221323	223543	151748	241064	223175	226815	297866	202440	230504	184837	227055	169128	266397	214769	216784	237273	191354	242681	238353	204701	132513	221474	263175	277903
O43399	Tumor protein D54 (hD54) (Tumor protein D52-like 2)	TPD52L2	TPD52L2	206	3	105102	94696.5	133315	152025	128154	176921	112713	130414	98345.5	143379	129162	119786	109532	179622	154415	103485	118276	92470.8	128047	133119	142272	129495	104121	144323	109495	130253	178648	101542	126628	120201	101153	92047.7	162355	140784	180451	177274	100997	123801	133285	122035	71167.5	111472	116084	169592
O43405	Cochlin (COCH-5B2)	COCH	COCH COCH5B2 UNQ257/PRO294	550	2	68277.7	65887	92023.7	153478	91101.1	144543	68731.6	104851	60214.3	53031.4	81463.3	54913.3	34588.1	132502	80897.7	58252.5	69114.1	75684.6	105412	72424.1	88659.8	105291	65259.5	56823.6	44904.4	87324.2	136069	86636.8	72046.6	52655	50202.5	70683.4	53675.6	127985	81966.3	119942	40367.3	48932.3	53297.4	50948	25884.5	52470.5	65565.1	84475.8
O43432	Eukaryotic translation initiation factor 4 gamma 3 (eIF-4-gamma 3) (eIF-4G 3) (eIF4G 3) (eIF-4-gamma II) (eIF4GII)	EIF4G3	EIF4G3	1585	3	488313	957983	801850	665841	549453	705694	780970	1.02495e+06	732352	729798	595386	773829	782825	620480	862387	463306	595850	764695	613285	956058	658251	531774	490146	671686	690358	505797	1.04026e+06	655589	784978	512534	496718	809730	893954	648836	626019	556574	536211	645002	723799	609458	341340	601080	997796	518904
O43447	Peptidyl-prolyl cis-trans isomerase H (PPIase H) (EC 5.2.1.8) (Rotamase H) (Small nuclear ribonucleoprotein particle-specific cyclophilin H) (CypH) (U-snRNP-associated cyclophilin SnuCyp-20) (USA-CYP)	PPIH	PPIH CYP20 CYPH	177	2	207307	193773	279026	282341	220584	322664	229894	214941	193321	218376	260130	228716	186595	409960	268692	273543	299151	211134	256778	309607	274633	234581	206620	285773	247930	260590	314162	240135	252206	204480	169768	233602	284750	236437	290430	253807	213919	200123	239498	222329	123784	222898	207313	229819
O43464	Serine protease HTRA2, mitochondrial (EC 3.4.21.108) (High temperature requirement protein A2) (HtrA2) (Omi stress-regulated endoprotease) (Serine protease 25) (Serine proteinase OMI)	HTRA2	HTRA2 OMI PRSS25	458	3	51757.3	55992.4	75575.7	58010.4	48279.4	89645.9	63256.9	49883.8	41444.4	43439.9	50303.8	36941.9	32836.1	83394.3	64839.2	73926.5	54207.4	48353.8	47258.3	64949.1	63227.2	59968.3	51946.6	66028.2	40889.7	48435	102963	45023.4	51128.8	51938.3	39708.2	44733.6	71574.4	59905.1	58992.5	49463.4	37242.3	30053.7	48976.2	23952.3	12949.1	41103	25287	59535.6
O43488	Aflatoxin B1 aldehyde reductase member 2 (EC 1.1.1.n11) (AFB1 aldehyde reductase 1) (AFB1-AR 1) (Aldoketoreductase 7) (Succinic semialdehyde reductase) (SSA reductase)	AKR7A2	AKR7A2 AFAR AFAR1 AKR7	359	4	300916	304328	288044	429180	313376	427054	434379	423106	337187	401598	470804	369293	303721	560872	368276	340974	372363	306339	418213	397289	428569	356790	307371	335343	324076	324049	436924	291567	374867	301828	275442	290013	378082	400935	433108	411400	316744	366097	344863	297137	196667	357530	301982	502655
O43491	Band 4.1-like protein 2 (Generally expressed protein 4.1) (4.1G)	EPB41L2	EPB41L2	1005	5	151320	90784.2	160994	159420	141705	177444	163141	143942	109462	188740	177038	149454	126711	230156	158621	142015	166137	114681	175388	145587	192968	182731	140311	152365	146577	170959	194780	123449	159720	131076	149099	125948	156856	130617	164859	140606	113280	137640	139030	141389	78847.1	122020	147011	174462
O43504	Ragulator complex protein LAMTOR5 (Hepatitis B virus X-interacting protein) (HBV X-interacting protein) (HBX-interacting protein) (Late endosomal/lysosomal adaptor and MAPK and MTOR activator 5)	LAMTOR5	LAMTOR5 HBXIP XIP	91	3	119157	110927	130082	158339	120433	192406	126970	131911	94729	158409	149024	127941	86129.7	218217	143985	123635	132068	91901.5	172443	128233	169924	175868	119508	148963	133765	162740	159202	121256	137378	113861	105277	103532	135339	134158	154702	177093	71958.6	100863	115554	122453	66167.3	99345.3	120321	177430
O43524	Forkhead box protein O3 (AF6q21 protein) (Forkhead in rhabdomyosarcoma-like 1)	FOXO3	FOXO3 FKHRL1 FOXO3A	673	2	83844.9	233398	234767	150230	114084	149702	233903	304082	171675	140977	199879	208244	273045	95987.3	227651	60561.1	111644	170759	112596	334080	135731	93196.6	54889.1	150240	173513	139513	295877	153226	192308	99724.9	71559.5	219148	99524.2	125526	143954	117718	140939	175918	128201	112427	61490.5	128424	214810	78173.3
O43581	Synaptotagmin-7 (IPCA-7) (Prostate cancer-associated protein 7) (Synaptotagmin VII) (SytVII)	SYT7	SYT7 PCANAP7	403	3	467614	406239	385150	513110	299505	436896	568747	550779	410645	313599	380833	461572	347823	669975	571971	508659	535180	429040	489257	590948	416625	350596	540352	408779	386955	366304	554842	315477	307534	428033	427896	370390	412414	524954	302243	298386	542128	442328	494751	241294	258783	411859	380825	614957
O43598	2'-deoxynucleoside 5'-phosphate N-hydrolase 1 (EC 3.2.2.-) (c-Myc-responsive protein RCL)	DNPH1	DNPH1 C6orf108 RCL	174	3	162061	110486	109807	165621	171033	211481	167001	186120	148963	263239	245483	171051	263090	235842	303868	175430	210187	173478	206444	255635	216219	200060	185173	244637	243057	242173	291241	204131	177093	174713	176835	146465	157326	210588	213771	172212	131275	171454	182718	170292	99943.6	130411	271591	211126
O43615	Mitochondrial import inner membrane translocase subunit TIM44	TIMM44	TIMM44 MIMT44 TIM44	452	3	95648.1	66405.9	101333	131572	95501.2	144952	126973	135592	87299.7	112049	114345	115683	76635.8	142848	118464	69904.5	92955.8	72102.5	157033	129081	141554	110365	116563	128668	103564	129329	196392	100663	104706	91385.7	88965.8	87842.4	101879	117071	111150	103344	84554.6	71880.6	66140.2	55038	36150.9	75463.9	64094.1	108433
O43617	Trafficking protein particle complex subunit 3 (BET3 homolog)	TRAPPC3	TRAPPC3 BET3 CDABP0066	180	2	91210.8	64520.4	95606.4	118230	118055	109223	79000.4	57286.1	90441.8	150316	89882.9	84228.8	48837.8	152129	103298	35187.3	67093.4	56490.3	107873	65272.6	119250	99908.8	102921	82201.1	82509.2	100238	102060	76376.7	90199	71993.2	61108.3	52785.6	80242.4	74518.9	99726.1	70743.3	55332.9	73250.4	41855.1	65674.4	41741	72323	53546.8	99985.7
O43633	Charged multivesicular body protein 2a (Chromatin-modifying protein 2a) (CHMP2a) (Putative breast adenocarcinoma marker BC-2) (Vacuolar protein sorting-associated protein 2-1) (Vps2-1) (hVps2-1)	CHMP2A	CHMP2A BC2 CHMP2	222	2	282942	341495	305431	287025	257451	296875	348235	347500	282053	302862	281796	294053	321041	445368	329164	289354	317659	274153	382127	310994	271714	269617	251164	229159	242494	294947	374446	251364	246591	190312	285147	299068	339794	287265	326162	369082	291404	305301	249729	252272	140591	287015	368931	337488
O43660	Pleiotropic regulator 1	PLRG1	PLRG1	514	2	6.20622e+06	1.32414e+07	1.23996e+07	8.72244e+06	7.28389e+06	8.38455e+06	1.1243e+07	1.26655e+07	9.60965e+06	1.02198e+07	1.02521e+07	1.03986e+07	1.3372e+07	7.73712e+06	1.13595e+07	5.36408e+06	7.62866e+06	1.11298e+07	6.52306e+06	1.40516e+07	7.48111e+06	6.45339e+06	5.86928e+06	9.69229e+06	9.26277e+06	7.69461e+06	1.3105e+07	9.07499e+06	1.06923e+07	7.00671e+06	7.19322e+06	1.38646e+07	1.1276e+07	8.24083e+06	6.37638e+06	6.13078e+06	9.80839e+06	1.04065e+07	9.35837e+06	8.28682e+06	5.08518e+06	8.98861e+06	1.34383e+07	6.27804e+06
O43676	NADH dehydrogenase [ubiquinone] 1 beta subcomplex subunit 3 (Complex I-B12) (CI-B12) (NADH-ubiquinone oxidoreductase B12 subunit)	NDUFB3	NDUFB3	98	2	159462	116833	166609	183681	150260	168333	126669	131674	82982.2	167850	145543	131696	136255	193063	142649	132234	97912.6	130757	154486	122425	178136	150951	126250	141548	126362	146328	150177	114873	149729	124811	135675	124170	142749	93063.8	156418	146849	99398.9	125469	126690	134709	72407.6	107038	139393	160357
O43681	ATPase ASNA1 (EC 3.6.-.-) (Arsenical pump-driving ATPase) (Arsenite-stimulated ATPase) (Transmembrane domain recognition complex 40 kDa ATPase subunit) (hARSA-I) (hASNA-I)	ASNA1	ASNA1 ARSA TRC40	348	3	159517	108858	156151	179273	163277	238597	159785	161846	122637	138897	161935	157904	112461	252986	174762	143645	160485	114200	181264	128926	211481	166679	115461	158011	133595	150444	188979	128960	168551	122743	136802	106614	163445	182454	203538	201773	117843	106647	142611	118962	62558.1	104906	132744	188745
O43684	Mitotic checkpoint protein BUB3	BUB3	BUB3	328	5	75626.7	61485.4	63178.5	79840.5	67561.4	141053	91333.1	68526.7	62230.2	67874.3	80378.8	70701.4	54983	92469.7	99297	88069.2	79500.1	63152.7	95354.9	78162.1	106945	89143.4	81543.6	80048.5	59052.1	77933.5	109749	58548.7	82420	70870.9	60925.4	60585.9	71796.7	92201.8	94015.6	61901.3	68938.2	52446.5	78154.1	61343.9	18997.9	42637.8	60316.7	90362.4
O43692	Peptidase inhibitor 15 (PI-15) (25 kDa trypsin inhibitor) (p25TI) (Cysteine-rich secretory protein 8) (CRISP-8) (SugarCrisp)	PI15	PI15 CRISP8 P25TI	258	8	150789	137846	124425	136934	99611	137846	117593	168766	100031	175903	115040	117384	131505	162946	202930	87611.7	135058	124604	313262	112472	382738	176892	327591	160328	114525	178511	171289	137479	118832	121869	94934.2	118179	128976	127612	129013	123738	97492.6	108872	99672	124564	84527.6	142940	178595	170761
O43704	Sulfotransferase family cytosolic 1B member 1 (ST1B1) (Sulfotransferase 1B1) (EC 2.8.2.-) (Sulfotransferase 1B2) (ST1B2) (Thyroid hormone sulfotransferase)	SULT1B1	SULT1B1 ST1B2 SULT1B2	296	3	1.43115e+06	2.61335e+06	2.12117e+06	1.62649e+06	1.65508e+06	1.94608e+06	1.69779e+06	3.46448e+06	1.47736e+06	1.56616e+06	1.46275e+06	1.75764e+06	2.15367e+06	1.86281e+06	1.97512e+06	1.26035e+06	1.44593e+06	1.50862e+06	1.31318e+06	1.90202e+06	1.45041e+06	1.48478e+06	1.11365e+06	1.47841e+06	1.39614e+06	1.31193e+06	2.45933e+06	1.30417e+06	1.77925e+06	1.21555e+06	1.30929e+06	1.57391e+06	1.83218e+06	1.57326e+06	1.75164e+06	1.4293e+06	2.38784e+06	1.75427e+06	1.48846e+06	1.49459e+06	950663	1.52141e+06	3.81942e+06	1.57787e+06
O43707	Alpha-actinin-4 (Non-muscle alpha-actinin 4)	ACTN4	ACTN4	911	24	338508	372789	345605	333237	272793	370817	312325	374739	267850	279746	290906	262238	308446	488446	416746	319064	349948	315278	333359	298825	366787	305784	239120	287772	290137	278310	367551	265083	313374	222944	295951	359041	355540	325800	348131	321482	219092	280826	285144	218723	130247	199942	316692	378249
O43708	Maleylacetoacetate isomerase (MAAI) (EC 5.2.1.2) (GSTZ1-1) (Glutathione S-transferase zeta 1) (EC 2.5.1.18)	GSTZ1	GSTZ1 MAAI	216	6	173521	154170	163426	259088	165434	218177	225703	218501	172920	161239	205443	201195	157014	235119	235774	200404	202765	158327	267166	224513	257512	203994	238533	211604	175619	205795	259059	176858	176100	190285	152900	131657	171561	221272	189533	185752	178859	165003	158039	117985	98635.1	184093	138150	220530
O43719	HIV Tat-specific factor 1 (Tat-SF1)	HTATSF1	HTATSF1	755	2	152106	143508	182632	198675	146727	203264	232368	215257	184042	158323	176533	192051	149900	259099	226916	155444	182960	140242	230276	227839	214101	189131	198460	210410	172175	124434	212139	163337	172431	163139	130910	162523	188915	219496	140782	173997	210976	157182	207475	128483	95725.4	123828	163232	212820
O43747	AP-1 complex subunit gamma-1 (Adaptor protein complex AP-1 subunit gamma-1) (Adaptor-related protein complex 1 subunit gamma-1) (Clathrin assembly protein complex 1 gamma-1 large chain) (Gamma1-adaptin) (Golgi adaptor HA1/AP1 adaptin subunit gamma-1)	AP1G1	AP1G1 ADTG CLAPG1	822	4	47562.3	42024	48370.5	80763.4	67158.5	98460.8	51909.7	58379.9	40625.1	50853.1	71372.6	68845.4	28800.9	76989.8	55279.6	52565.8	50811.7	40801.1	105367	42999.8	112762	85758.3	82403.7	71423.8	67763.8	74822.6	100918	66764.3	66402.9	50746.9	40375.8	43132.5	55516.4	79732.9	89883	100093	38953	46742.5	65038.4	43435.5	27840.4	41780.8	58651	73346.2
O43760	Synaptogyrin-2 (Cellugyrin)	SYNGR2	SYNGR2 UNQ352/PRO615	224	2	107401	88912.9	143444	148875	126486	213550	116087	126071	177400	166996	143411	99581.4	100261	137153	127942	94401.7	99574	135638	255165	386486	267551	178442	173474	173699	123945	123031	196210	130468	131351	114413	83320.3	95470	126640	159094	129368	155060	72356.5	80646.2	246506	87176.2	64175.9	88135	105301	69776.8
O43765	Small glutamine-rich tetratricopeptide repeat-containing protein alpha (Alpha-SGT) (Vpu-binding protein) (UBP)	SGTA	SGTA SGT SGT1	313	3	726018	733741	680562	663355	559861	689274	661231	815271	623709	751535	759187	719069	745898	922005	931706	633993	731773	708790	680789	788111	718423	528571	494354	621323	699717	622796	869337	592011	704686	527653	672730	703292	785949	636610	721485	616790	533848	721753	629351	555779	377553	549415	751434	774751
O43776	Asparagine--tRNA ligase, cytoplasmic (EC 6.1.1.22) (Asparaginyl-tRNA synthetase) (AsnRS)	NARS	NARS	548	5	90206.4	78233.2	94286	112066	78613.7	107671	94326	85995	82226	93665	113501	95273.3	72517.5	160029	93165	82502.4	97548.6	86046.8	103546	91743.5	123291	113795	79499.8	100798	89005.5	101341	138140	96826.5	70055.5	71207.7	74365.6	78764.3	101593	80829.6	87609.1	91240.5	63677.1	88930.1	81847.5	78762.9	34672.7	97383.3	67828.4	111285
O43795	Unconventional myosin-Ib (MYH-1c) (Myosin I alpha) (MMI-alpha) (MMIa)	MYO1B	MYO1B	1136	3	510479	694083	705507	616654	508719	625061	710387	820763	599658	741521	910941	935764	1.08892e+06	564773	986978	479374	543328	775322	572856	1.13483e+06	624648	486812	465898	718795	778849	703844	1.25724e+06	665933	824576	489458	428289	692612	649716	570862	639024	476892	525288	621077	619570	576328	361919	627411	955172	549335
O43809	Cleavage and polyadenylation specificity factor subunit 5 (Cleavage and polyadenylation specificity factor 25 kDa subunit) (CFIm25) (CPSF 25 kDa subunit) (Nucleoside diphosphate-linked moiety X motif 21) (Nudix motif 21) (Pre-mRNA cleavage factor Im 25 kDa subunit)	NUDT21	NUDT21 CFIM25 CPSF25 CPSF5	227	3	76872	68618.5	97118	76940.9	79602.3	126750	62487.6	110763	51085.9	94557.9	108477	45628.2	42944.5	111443	92197.7	70229.2	69329.5	62323.2	162400	86288.5	170436	132609	89863.4	100657	101799	127779	159158	109928	120137	52362.3	69882.8	63314.8	70969.1	68502.6	83253.5	96981.5	47354.4	35132.2	69196.1	70938.7	38491.8	42428.9	49127.8	78752.9
O43813	LanC-like protein 1 (40 kDa erythrocyte membrane protein) (p40)	LANCL1	LANCL1 GPR69A	399	3	181295	235897	199694	263308	156658	263493	259083	276576	185548	187980	245397	206989	160927	339011	260448	225559	220227	194456	305545	279775	283307	235899	233136	232989	194538	223561	293073	216995	219546	193322	164722	156824	238409	271515	222593	196124	195598	168570	203227	152093	91477.8	157806	193726	238087
O43815	Striatin	STRN	STRN	780	3	134694	429062	376760	269320	215177	272927	371188	485786	313696	329979	361966	343793	456933	235273	389913	165883	223629	345840	225060	507811	226874	175614	172327	291095	317755	263079	481200	270463	297339	200963	148301	368063	359420	229851	282218	229978	234332	334231	298109	216912	126715	221117	439423	178859
O43818	U3 small nucleolar RNA-interacting protein 2 (RRP9 homolog) (U3 small nucleolar ribonucleoprotein-associated 55 kDa protein) (U3 snoRNP-associated 55 kDa protein) (U3-55K)	RRP9	RRP9 RNU3IP2 U355K	475	2	248299	283575	301250	430019	282275	382730	369523	378785	283581	338918	343282	308764	342302	439158	397685	310682	334456	283365	342713	325323	337719	281581	276853	327131	328452	352333	352809	280202	315189	249910	322276	276993	386206	351829	279098	348654	392213	373893	347423	411636	174340	322593	370731	423635
O43837	Isocitrate dehydrogenase [NAD] subunit beta, mitochondrial (Isocitric dehydrogenase subunit beta) (NAD(+)-specific ICDH subunit beta)	IDH3B	IDH3B	385	5	168301	128634	188689	301808	144558	274666	315911	301429	206276	138202	250681	282726	111311	356428	288890	235156	248784	145093	501790	385896	408080	248210	378254	300656	260864	280394	399055	269619	245693	237011	123171	132094	179254	246647	171249	167286	222794	135694	180273	126272	58813.2	157364	116324	226151
O43847	Nardilysin (EC 3.4.24.61) (N-arginine dibasic convertase) (NRD convertase) (NRD-C) (Nardilysin convertase)	NRDC	NRDC NRD1	1150	3	186998	259907	287839	329054	278967	395765	293388	290488	258336	290694	284933	326664	231240	437149	299230	235365	232397	249692	364368	316019	354982	327629	271744	261106	314620	309392	384788	213379	285756	263138	177335	214968	273078	301488	287491	249619	245355	266433	241950	233529	150866	218439	308360	279164
O43852	Calumenin (Crocalbin) (IEF SSP 9302)	CALU	CALU	315	7	331350	351077	456980	529876	432920	601757	376947	390018	328921	439325	421523	376209	349183	588214	430885	367077	399517	286034	498581	400991	521607	472147	422443	487813	375183	450315	482837	364232	477810	432753	314097	353735	465033	523756	475578	487288	322510	306102	337389	350078	201484	320733	303048	451921
O43865	S-adenosylhomocysteine hydrolase-like protein 1 (DC-expressed AHCY-like molecule) (IP(3)Rs binding protein released with IP(3)) (IRBIT) (Putative adenosylhomocysteinase 2) (S-adenosyl-L-homocysteine hydrolase 2) (AdoHcyase 2)	AHCYL1	AHCYL1 DCAL IRBIT XPVKONA	530	2	121257	144156	144793	118251	104027	146799	154084	277074	159524	126045	148600	97439	78332.1	146309	170844	132208	137895	165286	117766	137225	136227	169930	97651.9	117636	97905.4	104834	179436	145183	106978	122325	135627	123173	129834	95841.1	133031	119900	127076	111553	188368	101887	49585.4	193461	186562	92018.6
O43895	Xaa-Pro aminopeptidase 2 (EC 3.4.11.9) (Aminoacylproline aminopeptidase) (Membrane-bound aminopeptidase P) (Membrane-bound APP) (Membrane-bound AmP) (mAmP) (X-Pro aminopeptidase 2)	XPNPEP2	XPNPEP2	674	3	166628	185202	225833	202537	186885	300434	191736	226105	143241	219540	226765	196445	208847	222205	218363	172388	157068	144463	270046	227482	207492	175673	154178	159626	145618	152860	231931	153341	142921	140025	164729	180420	193230	235349	243571	259759	104595	199277	180466	167107	89063.7	181272	225978	176397
O43896	Kinesin-like protein KIF1C	KIF1C	KIF1C KIAA0706	1103	3	370946	404812	364137	235848	259781	341420	363918	423342	344158	314144	414756	348077	423221	433394	462734	352202	377658	439017	302580	489374	330182	292977	230218	358566	358253	321353	504796	328407	342400	244524	327925	385458	345707	226133	267572	293513	251592	332896	334076	244058	159447	245690	446118	357456
O43913	Origin recognition complex subunit 5	ORC5	ORC5 ORC5L	435	2	845465	740602	954736	1.21788e+06	1.0162e+06	1.48397e+06	859583	919234	657670	1.15993e+06	1.19833e+06	1.04407e+06	590243	1.47439e+06	1.00995e+06	1.03954e+06	1.05976e+06	768026	1.03159e+06	878434	1.33409e+06	1.26772e+06	885911	1.07897e+06	882785	1.03991e+06	898258	881425	894653	871399	917611	833243	1.06876e+06	963167	1.19393e+06	1.39363e+06	677424	768617	858712	934387	481263	780212	650291	1.23015e+06
O60216	Double-strand-break repair protein rad21 homolog (hHR21) (Nuclear matrix protein 1) (NXP-1) (SCC1 homolog)	RAD21	RAD21 HR21 KIAA0078 NXP1 SCC1	631	3	351815	484963	429939	382911	335878	400316	506244	556729	344922	431871	484557	399156	392821	559668	487930	325692	394464	390067	357901	424893	403639	305844	265803	410487	429075	374214	483335	356627	417050	270691	319860	254641	456220	330717	372370	414100	318629	372216	369416	307136	221990	313731	407019	432766
O60231	Pre-mRNA-splicing factor ATP-dependent RNA helicase DHX16 (EC 3.6.4.13) (ATP-dependent RNA helicase #3) (DEAH-box protein 16)	DHX16	DHX16 DBP2 DDX16 KIAA0577 PRP2	1041	2	920832	1.15938e+06	1.2415e+06	1.17148e+06	892208	1.17268e+06	1.35518e+06	1.54198e+06	1.1014e+06	1.10324e+06	1.21278e+06	1.2095e+06	1.18284e+06	1.26742e+06	1.48488e+06	980145	1.15296e+06	1.19524e+06	1.08585e+06	1.43513e+06	975803	943345	951724	1.14056e+06	1.15375e+06	1.05975e+06	1.50089e+06	1.0364e+06	1.18084e+06	967757	866563	1.22678e+06	1.24967e+06	1.05181e+06	1.04456e+06	954741	1.09538e+06	1.23732e+06	1.21445e+06	910411	578383	987068	1.15055e+06	1.11849e+06
O60237	Protein phosphatase 1 regulatory subunit 12B (Myosin phosphatase-targeting subunit 2) (Myosin phosphatase target subunit 2)	PPP1R12B	PPP1R12B MYPT2	982	2	503518	1.39889e+06	1.28693e+06	887633	772801	884525	1.0994e+06	1.40452e+06	1.04986e+06	1.08375e+06	1.03331e+06	1.39167e+06	1.80479e+06	398969	1.37376e+06	301392	532206	974788	527168	1.76805e+06	535161	418279	450711	859127	978247	711263	1.74558e+06	850454	1.0133e+06	638468	394887	1.07507e+06	972629	774168	713621	588281	851302	1.09309e+06	824260	764416	509764	929554	1.77731e+06	239969
O60240	Perilipin-1 (Lipid droplet-associated protein)	PLIN1	PLIN1 PERI PLIN	522	3	335182	322236	306165	445836	293177	419988	405176	385866	257034	314881	393445	355705	408408	510872	441174	353651	363942	267887	395442	392610	387833	339086	329697	271767	327368	351975	435577	319310	323676	328858	288580	350915	350766	477516	363080	346427	365576	360812	340763	264698	170650	321405	278076	433135
O60256	Phosphoribosyl pyrophosphate synthase-associated protein 2 (PRPP synthase-associated protein 2) (41 kDa phosphoribosypyrophosphate synthetase-associated protein) (PAP41)	PRPSAP2	PRPSAP2	369	2	411594	450910	521986	413342	344862	509244	510226	549559	417031	472154	557118	447842	456403	638603	507303	370551	465010	408019	415729	502345	463566	526766	348384	477323	400806	441565	567194	388056	419984	324501	397127	471206	559239	445256	441409	414302	380833	460321	469050	365946	215011	337358	474836	529776
O60264	SWI/SNF-related matrix-associated actin-dependent regulator of chromatin subfamily A member 5 (SWI/SNF-related matrix-associated actin-dependent regulator of chromatin A5) (EC 3.6.4.-) (Sucrose nonfermenting protein 2 homolog) (hSNF2H)	SMARCA5	SMARCA5 SNF2H WCRF135	1052	2	700547	336795	384419	337432	319966	487984	476497	458256	357379	579779	476921	353599	207076	962065	625932	660032	567969	218420	268734	241554	293350	301830	234102	299294	274316	281553	423711	291714	273016	191640	608727	315766	453715	185310	384334	471385	341082	391828	352798	419435	179480	196207	268390	954183
O60271	C-Jun-amino-terminal kinase-interacting protein 4 (JIP-4) (JNK-interacting protein 4) (Cancer/testis antigen 89) (CT89) (Human lung cancer oncogene 6 protein) (HLC-6) (JNK-associated leucine-zipper protein) (JLP) (Mitogen-activated protein kinase 8-interacting protein 4) (Proliferation-inducing protein 6) (Protein highly expressed in testis) (PHET) (Sperm surface protein) (Sperm-associated antige…	SPAG9	SPAG9 HSS KIAA0516 MAPK8IP4 SYD1 HLC6	1321	5	474204	1.5824e+06	2.0318e+06	979945	874528	1.03215e+06	1.29195e+06	1.76152e+06	1.2472e+06	1.24882e+06	1.44993e+06	1.44823e+06	1.95905e+06	702733	1.5342e+06	494934	817853	1.26692e+06	759079	2.02831e+06	844678	698460	717668	1.14849e+06	1.19559e+06	856612	2.14095e+06	1.02162e+06	1.28505e+06	849109	416292	1.83217e+06	1.48937e+06	856010	878611	729830	1.31846e+06	1.29253e+06	1.30238e+06	969523	613312	1.21153e+06	2.01076e+06	531501
O60282	Kinesin heavy chain isoform 5C (Kinesin heavy chain neuron-specific 2)	KIF5C	KIF5C KIAA0531 NKHC2	957	4	179781	172449	162638	174552	174107	182439	160621	196573	157092	192051	193531	154668	160177	257340	222091	206834	198803	147587	135170	177832	169511	148851	110970	152358	160938	127524	184970	126927	134254	104761	164994	184363	182427	141356	179713	154924	138064	179750	195042	149234	102044	98220.5	186421	245947
O60287	Nucleolar pre-ribosomal-associated protein 1 (Nucleolar protein 254 kDa) (URB1 ribosome biogenesis 1 homolog)	URB1	URB1 C21orf108 KIAA0539 NOP254 NPA1	2271	3	305980	263422	400991	467883	360193	564990	358410	356829	294098	516842	502005	413447	277997	577317	299046	344156	398440	283931	471127	283779	593301	539943	362703	365427	355506	502659	477307	382154	400627	384035	293821	291584	369453	319532	435507	484497	261458	282731	287462	367413	161113	349900	312335	480948
O60292	Signal-induced proliferation-associated 1-like protein 3 (SIPA1-like protein 3) (SPA-1-like protein 3)	SIPA1L3	SIPA1L3 KIAA0545 SPAL3	1781	3	310450	306202	240883	253791	181543	239615	273894	333093	248242	244172	263173	239995	289077	309102	320610	247421	281665	309896	200977	283504	221142	173621	149141	201608	237400	195671	324405	189567	207983	157679	256569	277169	273587	199321	234465	198288	205959	295875	275408	206253	134223	210519	290226	268035
O60306	Intron-binding protein aquarius (Intron-binding protein of 160 kDa) (IBP160)	AQR	AQR KIAA0560	1485	2	295761	229958	323010	268387	220667	372107	316005	378161	254638	253788	302370	103692	219314	437827	353255	250899	305857	287191	355418	287518	358586	283220	257650	258607	240128	215075	357890	224283	255913	277935	417794	241906	395183	346682	246509	246500	223194	367116	548040	240670	160992	249795	229981	395522
O60307	Microtubule-associated serine/threonine-protein kinase 3 (EC 2.7.11.1)	MAST3	MAST3 KIAA0561	1309	3	651746	594508	685469	586908	523383	753217	570925	815306	561944	509176	498991	672957	726489	841979	588614	506306	543047	661329	689402	479112	835370	598794	570547	535936	581485	642498	782462	511096	665413	495551	515541	602872	623680	661736	566474	537873	571669	575315	630507	419901	216652	530791	563227	641011
O60313	Dynamin-like 120 kDa protein, mitochondrial (EC 3.6.5.5) (Optic atrophy protein 1) [Cleaved into: Dynamin-like 120 kDa protein, form S1]	OPA1	OPA1 KIAA0567	960	5	183406	114589	203005	279442	137366	239062	258037	242524	214077	146246	187797	213115	89402.8	305787	214221	208740	213876	194760	771881	278480	900188	318864	751993	417832	259283	342603	559493	275916	322579	364074	119325	101647	163651	253167	162594	217132	195517	107379	153353	91835.6	73151.2	140114	118920	194308
O60318	Germinal-center associated nuclear protein (GANP) (80 kDa MCM3-associated protein) (MCM3 acetylating protein) (MCM3AP) (EC 2.3.1.-) (MCM3 acetyltransferase)	MCM3AP	MCM3AP GANP KIAA0572 MAP80	1980	2	65415.9	62818.9	101764	89104.1	61834.5	98092.1	140401	172315	133580	124248	125780	69204.8	215352	123600	93435.1	52692.8	83034.9	115336	92232.3	80751.6	102573	91843.5	55838.2	121908	83031.1	88487	109315	59906.4	104606	81622.1	87254.4	76455.5	110079	79240.8	57922.4	62826	60959.1	124954	78700.3	67602	35990.8	52559.5	178724	111402
O60333	Kinesin-like protein KIF1B (Klp)	KIF1B	KIF1B KIAA0591 KIAA1448	1816	3	343473	436626	437615	420077	356049	362933	376565	483899	300362	358384	397904	382648	511093	496575	431300	341745	428391	296748	383261	398215	347417	354887	245175	284702	341712	364361	415561	288512	345073	243138	331702	375879	468444	303413	417200	359922	344540	382697	361411	289862	186195	315902	315023	392553
O60343	TBC1 domain family member 4 (Akt substrate of 160 kDa) (AS160)	TBC1D4	TBC1D4 AS160 KIAA0603	1298	4	341828	394607	446425	378143	301797	460749	425663	438456	338211	341096	360663	385891	346749	591079	433645	404655	449014	388856	522795	450863	570211	419334	419061	392161	393380	429951	510945	407033	425828	345999	322333	400267	462740	356221	352414	361767	329820	376621	380774	301863	196872	293604	430809	511994
O60437	Periplakin (190 kDa paraneoplastic pemphigus antigen) (195 kDa cornified envelope precursor protein)	PPL	PPL KIAA0568	1756	6	91712.7	66420.2	94817.5	91578.5	84576.2	130613	79511.3	93252.2	70439	105020	114834	107276	61520.7	144044	112810	104281	95159.8	62594	153211	84592.6	164604	142744	116272	127006	95969.2	126908	139837	101139	120970	92090.8	65582.9	58412.3	91442.9	95284.5	88318.7	95165	67347.4	58925.6	69838	84023.4	37028.7	62618.8	64615.6	107994
O60493	Sorting nexin-3 (Protein SDP3)	SNX3	SNX3	162	3	225439	280063	277176	195910	157441	253709	241520	296614	212548	216536	240403	231238	296953	305937	246948	164292	148393	202595	195433	253267	224778	193990	164113	204982	207455	192462	363860	209321	262968	169726	102530	222049	238775	182823	211046	223255	190293	185641	203782	159876	90335.1	132197	280451	168942
O60494	Cubilin (460 kDa receptor) (Intestinal intrinsic factor receptor) (Intrinsic factor-cobalamin receptor) (Intrinsic factor-vitamin B12 receptor)	CUBN	CUBN IFCR	3623	4	280825	533155	586406	447556	323238	457784	572962	744336	485199	498959	541077	526101	695188	385477	548906	277985	372301	468289	371617	714657	430396	330995	323469	450926	476543	407812	692767	472695	488539	344192	252932	496639	601744	382848	390097	351066	452427	472560	453665	374178	211915	368463	656473	290681
O60496	Docking protein 2 (Downstream of tyrosine kinase 2) (p56(dok-2))	DOK2	DOK2	412	2	97779.6	20551.2	274081	25019.8	29603.3	167075	165760	68834.1	43118.5	59891	153939	79157.3	26776.8	122107	60312.9	52007.5	21756.8	39852.7	93022.3	112537	166902	99002.2	80068.8	97978.2	116305	52811.7	150003	61020.6	102224	61649.5	22656.7	50303.7	68918.6	65490.7	63962.2	100964	35238.2	19923.9	65555.3	64402.6	10789.2	16990.4	35612	48110
O60502	Protein O-GlcNAcase (OGA) (EC 3.2.1.169) (Beta-N-acetylglucosaminidase) (Beta-N-acetylhexosaminidase) (Beta-hexosaminidase) (Meningioma-expressed antigen 5) (N-acetyl-beta-D-glucosaminidase) (N-acetyl-beta-glucosaminidase) (Nuclear cytoplasmic O-GlcNAcase and acetyltransferase) (NCOAT)	MGEA5	MGEA5 HEXC KIAA0679 MEA5	916	3	245858	198625	259166	338190	233634	350486	347581	442766	271592	267561	310179	304147	199204	390771	357611	282116	272668	223194	429935	334270	328195	281251	309568	327871	298407	294993	392670	280448	247528	242260	198277	236216	276959	332330	314290	322445	238811	273846	302860	223095	161773	243072	235958	313864
O60504	Vinexin (SH3-containing adapter molecule 1) (SCAM-1) (Sorbin and SH3 domain-containing protein 3)	SORBS3	SORBS3 SCAM1	671	4	471056	530771	513961	470787	433457	546417	474111	545483	416719	513987	507338	471515	522814	658879	617455	453926	486798	484956	512305	503582	521712	480194	371685	451147	465764	475172	622162	424745	558639	367803	453534	519610	537914	485310	546395	488176	379912	477393	466222	399423	259520	392135	515097	538850
O60506	Heterogeneous nuclear ribonucleoprotein Q (hnRNP Q) (Glycine- and tyrosine-rich RNA-binding protein) (GRY-RBP) (NS1-associated protein 1) (Synaptotagmin-binding, cytoplasmic RNA-interacting protein)	SYNCRIP	SYNCRIP HNRPQ NSAP1	623	6	118802	89106.5	145864	137847	125390	176361	111987	140669	98976.7	142643	142554	132929	88148.8	192141	139481	127990	135090	67553	154922	111154	179251	149357	118268	140371	112748	137479	184951	116833	138693	96592.1	98870.2	79648.4	119285	130311	137013	137748	79340.4	96823.6	115103	110749	46782	82195.3	78725.5	136615
O60508	Pre-mRNA-processing factor 17 (Cell division cycle 40 homolog) (EH-binding protein 3) (Ehb3) (PRP17 homolog) (hPRP17)	CDC40	CDC40 EHB3 PRP17 PRPF17	579	2	930254	837306	937422	1.2548e+06	827607	974614	1.26937e+06	1.28239e+06	1.013e+06	871828	1.04186e+06	852958	795652	1.55976e+06	1.37083e+06	1.06741e+06	1.03468e+06	866305	1.16621e+06	1.2009e+06	1.11609e+06	923907	1.05823e+06	1.05808e+06	1.01474e+06	973875	1.34192e+06	892728	915391	965815	783654	682851	1.05271e+06	1.25929e+06	957267	900716	1.03416e+06	1.00836e+06	968880	664947	497215	898758	598738	1.08857e+06
O60518	Ran-binding protein 6 (RanBP6)	RANBP6	RANBP6	1105	2	129879	85638.2	202049	166039	172201	309040	144532	64364.6	97209.1	175067	205433	126031	65399.3	217843	71809.2	125474	135975	72744.8	256297	176990	309999	260813	210398	233185	149083	194725	278538	183509	198277	147009	110607	116261	147790	130523	167939	214744	102822	75361.7	94134.3	143144	34670.5	95104.1	88194	63067.2
O60524	Nuclear export mediator factor NEMF (Antigen NY-CO-1) (Serologically defined colon cancer antigen 1)	NEMF	NEMF SDCCAG1	1076	4	853500	794844	830454	634333	434450	648727	807883	1.02891e+06	622203	663144	815802	642655	970886	1.0397e+06	908912	686395	769208	786950	425578	727000	538209	464153	333662	618493	572685	526180	715865	450177	572061	374222	842474	832331	839358	669453	642453	584047	647811	888429	832263	620061	436086	687470	972964	858932
O60547	GDP-mannose 4,6 dehydratase (EC 4.2.1.47) (GDP-D-mannose dehydratase) (GMD)	GMDS	GMDS	372	3	320520	325251	394060	408330	356521	410041	392023	417828	363542	331525	378307	419574	284211	570032	419705	373352	382547	363995	444169	414731	410916	320321	351809	371026	317584	377126	404688	321094	306892	297084	323452	291646	400218	400322	404788	339406	346543	394418	413846	268612	185818	309610	345859	453633
O60566	Mitotic checkpoint serine/threonine-protein kinase BUB1 beta (EC 2.7.11.1) (MAD3/BUB1-related protein kinase) (hBUBR1) (Mitotic checkpoint kinase MAD3L) (Protein SSK1)	BUB1B	BUB1B BUBR1 MAD3L SSK1	1050	3	192636	241176	241659	252837	192391	278020	253650	319850	172283	208281	275160	195123	247212	342546	312563	197967	208711	191247	375786	224217	262787	239519	288248	280868	238583	229942	281044	247285	245085	244210	143886	190260	210387	334569	217152	215444	182950	212674	169297	151598	105374	148608	213230	239511
O60568	Procollagen-lysine,2-oxoglutarate 5-dioxygenase 3 (EC 1.14.11.4) (Lysyl hydroxylase 3) (LH3)	PLOD3	PLOD3	738	4	113023	80475.6	108090	77228.3	79741.4	134579	104784	89775.9	65463.3	113894	111090	108452	65523	146365	97405.2	96155.4	84970.6	81831.2	146043	116868	179706	136723	122249	133832	108466	77320.7	154372	112056	133162	101784	78506.7	77448.1	117589	93791.8	83035.4	84010.8	77293.2	94559.4	82808.6	79582.6	54747.4	94011.3	94680.9	117738
O60610	Protein diaphanous homolog 1 (Diaphanous-related formin-1) (DRF1)	DIAPH1	DIAPH1 DIAP1	1272	3	6589.22	5090.92	7618.04	5669.74	5274.94	10209.8	4361.68	8458.46	7123.15	6122.42	7498.19	7322.37	4468.21	7344.39	10911.1	6007.19	5437.37	3459.2	18201.7	9806.47	26309.7	12101	14676.9	14745.2	9568.4	12369.7	13188.9	17090	13978.2	8839.85	4300.23	3249.98	7109.22	7995.94	7104.79	6722	5706.94	2756.39	4571.23	6408.38	2438.19	5115.91	3761.54	9487.34
O60613	Selenoprotein F (15 kDa selenoprotein)	SELENOF	SELENOF SEP15	162	2	230002	153681	279538	368747	297514	402519	373844	351172	222355	276015	316671	298472	232451	420736	332322	252892	245122	165069	382213	303248	376177	345543	312273	348797	274812	307643	391193	273406	303373	274376	257373	209980	281919	376520	377030	341468	244186	273146	304864	229374	122199	250005	268369	320629
O60635	Tetraspanin-1 (Tspan-1) (Tetraspan NET-1) (Tetraspanin TM4-C)	TSPAN1	TSPAN1	241	3	224907	201030	253536	310214	185047	290114	277391	297351	242642	169032	204791	314457	191393	332363	307567	232686	209066	258724	411422	319324	325276	309243	353648	293449	242702	255841	295924	252605	234170	237434	145261	171347	189704	267719	201810	205134	268283	201205	247611	158823	115296	219915	220950	241734
O60645	Exocyst complex component 3 (Exocyst complex component Sec6)	EXOC3	EXOC3 SEC6 SEC6L1	756	3	224219	192520	379779	281467	208594	251997	270572	245606	254780	270296	252579	241512	277263	554231	370449	314628	322784	253337	281463	280211	334579	254051	220727	261352	273021	314884	418218	250879	305334	236671	262751	286651	377124	294568	301033	282664	196996	247970	287945	236194	156711	236883	328989	466855
O60664	Perilipin-3 (47 kDa mannose 6-phosphate receptor-binding protein) (47 kDa MPR-binding protein) (Cargo selection protein TIP47) (Mannose-6-phosphate receptor-binding protein 1) (Placental protein 17) (PP17)	PLIN3	PLIN3 M6PRBP1 TIP47	434	12	132518	132480	144907	169424	153046	208453	139404	161132	121478	169333	169191	151970	134138	210010	178364	126247	142994	117504	150225	135602	173219	157080	121216	156228	150378	174899	190803	129990	156187	123784	117153	103936	143382	157504	181766	162766	108932	120452	125390	123655	75712.5	124634	147061	160711
O60678	Protein arginine N-methyltransferase 3 (EC 2.1.1.-) (Heterogeneous nuclear ribonucleoprotein methyltransferase-like protein 3)	PRMT3	PRMT3 HRMT1L3	531	2	346475	296582	110730	381517	310799	403248	124193	297295	291652	392555	337160	284296	363864	406357	431956	27385.5	256897	123860	298358	115628	199419	202980	309435	345694	308224	293115	93074.3	92594.8	66464.7	251990	325205	319165	366641	338408	396457	377906	106293	352339	298643	70825.7	165253	211138	399334	454368
O60684	Importin subunit alpha-7 (Karyopherin subunit alpha-6)	KPNA6	KPNA6 IPOA7	536	3	235281	306318	284183	189003	166119	241925	245771	288052	237290	234011	248440	210636	284086	252004	275716	216970	244750	252785	187249	299008	188210	159513	153237	230035	172173	171912	360783	175140	202529	186670	215334	304355	305112	163225	231449	254239	200626	253449	260475	202103	103615	174770	289033	269813
O60701	UDP-glucose 6-dehydrogenase (UDP-Glc dehydrogenase) (UDP-GlcDH) (UDPGDH) (EC 1.1.1.22)	UGDH	UGDH	494	11	115081	90088.9	226977	149929	138817	226274	121635	123947	93060.8	170435	201631	141643	83992.6	153805	100540	103715	95438.6	86533.1	128814	97132.8	144507	125330	91162.6	110165	87355.4	100642	120938	83068.7	102734	71736.5	114254	68356.6	192432	147055	148111	165833	74314.1	85902.1	156503	136751	79487.5	104323	78894.8	122034
O60716	Catenin delta-1 (Cadherin-associated Src substrate) (CAS) (p120 catenin) (p120(ctn)) (p120(cas))	CTNND1	CTNND1 KIAA0384	968	15	74422.4	76667.2	84600.3	95647.7	83324.9	140134	88500.6	76449.2	71611.6	88080.1	102113	79003.8	51933.8	144749	83189.5	83875.7	82475.1	65521.9	146874	89109.7	175826	133950	106887	110802	96378.2	115092	140387	102038	116014	80617.9	74403.9	79864.1	79091.9	105407	75499.8	102748	57413.7	56684.8	76631.8	72726.1	41258.2	58023.6	71339.1	100911
O60749	Sorting nexin-2 (Transformation-related gene 9 protein) (TRG-9)	SNX2	SNX2 TRG9	519	2	160169	157560	147771	137594	111353	165938	138256	156549	165607	137551	152502	147156	128961	176892	187982	123784	138455	122941	179186	166565	134243	128153	106479	149302	129746	136938	206382	107758	117372	136364	146140	141899	177999	136349	152430	132478	146467	158446	172037	113495	85188.9	128044	162672	156219
O60763	General vesicular transport factor p115 (Protein USO1 homolog) (Transcytosis-associated protein) (TAP) (Vesicle-docking protein)	USO1	USO1 VDP	962	7	71516.6	67032.8	84924.6	139059	117561	188817	80152.4	84904.6	67327.7	78106.5	91076.1	89108.2	59500.2	134944	100264	82828.3	83726.5	85535.2	145400	91112.7	160896	136631	101731	108188	112298	136166	143615	110813	135418	80828.8	56018.6	83837.9	87953.5	129540	131164	126164	62048.2	74176.5	84858.3	63049.5	44606.6	56054.2	93350	99240.5
O60784	Target of Myb protein 1	TOM1	TOM1	492	4	49104.4	32708.3	56643.3	48099	38658.5	89578.8	50546.4	56886.9	38540.3	52556.9	96236.7	55098.8	24901.1	66732	58491.6	46504.4	51612.9	34426.6	89883.4	78105.3	95516.3	68668.7	56081.7	69479.3	59560.8	73681.5	114994	69475.4	74405.9	48501.3	22689.3	43206.4	49415.2	47270.5	41744.9	53842.8	37355	21567.3	36808.2	38616	14579.9	28469.8	34670.2	39499.2
O60825	6-phosphofructo-2-kinase/fructose-2,6-bisphosphatase 2 (6PF-2-K/Fru-2,6-P2ase 2) (PFK/FBPase 2) (6PF-2-K/Fru-2,6-P2ase heart-type isozyme) [Includes: 6-phosphofructo-2-kinase (EC 2.7.1.105); Fructose-2,6-bisphosphatase (EC 3.1.3.46)]	PFKFB2	PFKFB2	505	3	939061	847465	886562	996669	715878	840205	1.03145e+06	1.01607e+06	996461	1.08415e+06	1.03184e+06	1.01357e+06	946534	1.45416e+06	1.01378e+06	605431	1.01126e+06	894961	719716	1.05514e+06	686145	957595	625636	851552	879209	710424	1.07376e+06	874299	988770	653152	873532	891184	958107	802364	893780	819709	899468	955683	1.10857e+06	840876	618968	851932	1.18447e+06	928829
O60826	Coiled-coil domain-containing protein 22	CCDC22	CCDC22 CXorf37 JM1	627	2	140902	128092	174116	260417	217073	292742	203964	228939	149119	151951	184370	184385	130254	274781	218748	168359	192867	128461	262759	224243	244715	202081	215957	207424	156144	171326	249962	170297	168598	172592	124717	112737	170454	243833	199188	207918	142927	132978	157750	123648	64409.7	135982	120525	213456
O60832	H/ACA ribonucleoprotein complex subunit 4 (EC 5.4.99.-) (CBF5 homolog) (Dyskerin) (Nopp140-associated protein of 57 kDa) (Nucleolar protein NAP57) (Nucleolar protein family A member 4) (snoRNP protein DKC1)	DKC1	DKC1 NOLA4	514	3	112230	84979.7	99816.6	149855	110535	158865	106212	127204	77957.1	115562	140297	110613	71307.3	150251	115877	94782.4	88381.4	86761.5	160646	89627.8	225331	140534	108528	114774	94060.6	127313	131337	92656.9	105607	106272	101771	77387.3	96128	137251	123175	138831	74296.6	98068.9	114142	91260.6	50007.5	77151.8	105461	116745
O60841	Eukaryotic translation initiation factor 5B (eIF-5B) (EC 3.6.5.3) (Translation initiation factor IF-2)	EIF5B	EIF5B IF2 KIAA0741	1220	3	97183.5	90274.2	109866	132717	76160.3	138774	111399	136029	75163.5	117932	171966	168306	78604	134169	142183	80340.6	84409	81471.1	154135	97070.8	127650	107813	127728	120678	95449.5	112120	127026	92654.9	128945	100689	93106.8	85550.1	114629	124782	124228	124064	82237.3	85198	111562	97844.5	83505.2	110050	101711	121327
O60869	Endothelial differentiation-related factor 1 (EDF-1) (Multiprotein-bridging factor 1) (MBF1)	EDF1	EDF1	148	2	60943.1	50287.5	62765.5	112641	85142.4	103994	62250.4	72669.3	62577	80854.7	72597.5	68889.7	80724.3	110669	75184.2	64031.2	66077	64964.2	60926.6	65918.2	83991.9	72883.2	51750.7	57921.1	68342.7	89000.5	91573.7	58848.1	65763.5	45709.5	37060.9	56772.8	46316.7	101735	102745	80923.3	54725.8	45678	49678.5	77410.1	34094.1	49490.4	79760.9	64590.7
O60879	Protein diaphanous homolog 2 (Diaphanous-related formin-2) (DRF2)	DIAPH2	DIAPH2 DIA	1101	2	647798	292705	431550	294424	332572	550223	379383	407952	333997	378559	466511	303326	219368	828196	600216	579857	514406	243974	292747	272677	423089	294469	251441	371749	335108	337044	480035	371977	309897	224202	544035	313807	375720	268535	432185	462495	299117	328911	371050	281179	177775	172779	260026	685664
O60884	DnaJ homolog subfamily A member 2 (Cell cycle progression restoration gene 3 protein) (Dnj3) (Dj3) (HIRA-interacting protein 4) (Renal carcinoma antigen NY-REN-14)	DNAJA2	DNAJA2 CPR3 HIRIP4	412	4	282849	269369	305659	382643	283262	341429	352717	382650	255969	269879	304449	313998	292661	427508	382424	291501	321856	253295	330666	302878	351944	277705	293305	334080	249838	278232	356893	249577	271729	244257	235571	213627	304986	357798	285772	300232	241539	262246	246939	220761	153489	244966	233282	334639
O60888	Protein CutA (Acetylcholinesterase-associated protein) (Brain acetylcholinesterase putative membrane anchor)	CUTA	CUTA ACHAP C6orf82	179	7	96440.5	95961.5	201967	187807	143455	257787	134717	149985	106033	158099	193331	164318	103537	203313	142632	103517	119924	93797.3	227242	156275	251568	235228	158848	256943	146335	189291	247870	151402	188098	136773	72970	94253.2	155669	172691	162175	174301	79041	91819.7	104935	133872	51470.4	93025.7	94089.9	143097
O60934	Nibrin (Cell cycle regulatory protein p95) (Nijmegen breakage syndrome protein 1)	NBN	NBN NBS NBS1 P95	754	2	1.09379e+06	2.46647e+06	2.31537e+06	754388	785294	1.18911e+06	2.11288e+06	1.79765e+06	1.60359e+06	1.64704e+06	1.45232e+06	543163	2.60722e+06	672794	1.57525e+06	706886	1.14668e+06	1.70156e+06	901445	2.61906e+06	1.18827e+06	943173	1.19528e+06	1.73767e+06	1.66124e+06	1.00994e+06	2.60378e+06	1.22941e+06	1.66743e+06	1.25883e+06	523823	2.21172e+06	2.26226e+06	1.35214e+06	1.5567e+06	1.22894e+06	1.4915e+06	1.47751e+06	2.00692e+06	1.27339e+06	835053	1.47901e+06	2.46919e+06	1.24656e+06
O60936	Nucleolar protein 3 (Apoptosis repressor with CARD) (Muscle-enriched cytoplasmic protein) (Myp) (Nucleolar protein of 30 kDa) (Nop30)	NOL3	NOL3 ARC NOP	208	2	144438	239160	224435	201178	167809	191928	209256	305065	176579	213420	257176	223278	327275	199894	264735	112786	188510	215422	152665	202314	167086	128046	105488	157885	211451	202934	263646	175725	208459	129307	110765	197327	183024	190516	210935	149172	165006	208008	169678	120640	87834.1	141070	228677	159951
O75027	ATP-binding cassette sub-family B member 7, mitochondrial (ATP-binding cassette transporter 7) (ABC transporter 7 protein)	ABCB7	ABCB7 ABC7	752	2	493721	376277	334813	223148	156857	220502	325440	432064	300342	282096	305811	321551	286497	520290	439964	351613	423092	416933	266004	413087	294164	165112	200991	267204	276221	224930	438088	252139	290605	191845	399869	311408	325016	196652	205338	184545	290752	274124	301348	228679	183821	253626	299034	412225
O75044	SLIT-ROBO Rho GTPase-activating protein 2 (srGAP2) (Formin-binding protein 2) (Rho GTPase-activating protein 34)	SRGAP2	SRGAP2 ARHGAP34 FNBP2 KIAA0456 SRGAP2A	1071	2	397687	454318	607240	450322	399688	505995	520899	509690	408177	562524	532069	484930	353961	634736	612696	392139	610994	385345	590340	515439	720533	652937	461149	638991	390648	575459	749435	560782	609806	487562	571767	552251	661679	398125	637879	720041	436336	523385	454293	494492	288910	460895	497678	638844
O75064	DENN domain-containing protein 4B	DENND4B	DENND4B KIAA0476	1496	2	922462	220883	349072	240717	197587	393006	547004	473748	603964	250912	216781	254092	309897	316194	579005	319831	222989	146943	210483	653711	249731	149706	147797	275966	293750	207970	419337	295620	222635	220027	800500	191583	312375	165361	275612	351062	504263	383939	502234	202308	77791.7	214296	257530	284588
O75083	WD repeat-containing protein 1 (Actin-interacting protein 1) (AIP1) (NORI-1)	WDR1	WDR1	606	16	369405	461896	454402	444971	388596	467510	429202	479190	359942	454919	431689	452195	434368	492340	547366	316477	339616	343991	368721	474311	410421	306880	282042	379993	399663	395818	574611	344532	434753	346499	344262	385675	402864	396245	407683	354595	312995	344031	318753	322338	193204	329170	404282	361254
O75112	LIM domain-binding protein 3 (Protein cypher) (Z-band alternatively spliced PDZ-motif protein)	LDB3	LDB3 KIAA0613 ZASP	727	5	172021	238296	188974	107290	114129	175756	309571	295667	232402	151450	187249	176383	261107	221198	251566	216248	173596	230683	99507.1	179204	140057	100892	74259.4	136803	113494	110343	141672	139523	115637	96733.8	188656	244786	226096	107328	156192	121487	215067	254270	216413	144036	82701.4	157521	295890	163573
O75113	NEDD4-binding protein 1 (N4BP1)	N4BP1	N4BP1 KIAA0615	896	2	45691.2	35693.5	52633.5	73505.7	47232.9	67528.3	72177.4	61516	50777.1	34866.1	52786.6	43742.6	32736.2	90820.8	65483	61698.1	62368.7	43599.1	100091	90029.3	90027.3	59252.5	84833	72825	59710.8	63853.7	90557.5	61624.9	62847.4	59066.7	37595.3	34814.4	51861.9	68530.1	49128.6	52934.8	52666.6	47089.6	45163.3	29497.3	28765.8	43136.5	31666.8	60096.2
O75116	Rho-associated protein kinase 2 (EC 2.7.11.1) (Rho kinase 2) (Rho-associated, coiled-coil-containing protein kinase 2) (Rho-associated, coiled-coil-containing protein kinase II) (ROCK-II) (p164 ROCK-2)	ROCK2	ROCK2 KIAA0619	1388	2	172217	266362	258059	266849	189361	246846	224490	231121	186907	265116	264420	227957	244198	230409	254889	158683	187351	194243	212830	264739	262950	221450	176755	224795	232317	220887	284719	206492	242522	159463	138422	184241	286277	192533	220508	190756	139782	257734	251656	192670	114957	183039	278531	199861
O75122	CLIP-associating protein 2 (Cytoplasmic linker-associated protein 2) (Protein Orbit homolog 2) (hOrbit2)	CLASP2	CLASP2 KIAA0627	1294	2	347950	599280	460658	513742	274751	423618	536547	503713	494822	507872	530292	609902	636052	289193	594567	221518	380118	507297	305458	310574	308408	275224	260046	439851	459500	376436	554804	382805	446092	334938	303629	260613	522968	410902	474684	363261	438015	581039	501622	409549	316059	454798	594604	267528
O75131	Copine-3 (Copine III)	CPNE3	CPNE3 CPN3 KIAA0636	537	4	104275	86147.2	95151.1	149164	120455	167480	77949.5	103206	74528.7	103286	106362	81880.5	73374	137223	104525	92522.2	107514	69559.7	142657	98755.4	133169	142182	99837.6	113192	101266	105592	121980	94602.1	106092	68490.6	97820.3	91460	106728	118469	139538	148410	82022.3	79256.2	103686	77274.3	47706.3	76541.3	82677.5	116142
O75140	GATOR complex protein DEPDC5 (DEP domain-containing protein 5)	DEPDC5	DEPDC5 KIAA0645	1603	2	33288.4	32527.4	55094.4	35689.1	32359.5	49963.5	31955.5	31773.6	24206.8	46894.1	33071.1	20596.6	19592.8	46389.2	39752.2	43371.2	36995.2	34938.4	58088.5	37693.4	55192.1	23715.3	38007	49061.9	13738.7	30117.6	48683.2	18361.4	50435.3	29107.1	25227.4	36865.8	43450.9	24708.7	26493.9	37371.7	32009.2	15139.3	40078.1	24648.4	7470.43	33915.2	25129.9	30560.7
O75146	Huntingtin-interacting protein 1-related protein (HIP1-related protein) (Huntingtin-interacting protein 12) (HIP-12)	HIP1R	HIP1R HIP12 KIAA0655	1068	5	391955	509622	541637	478232	372450	467968	498944	636613	428459	458338	461789	393704	634624	774877	526496	337475	510412	385414	359691	435102	454724	392231	337247	407189	427989	431410	552832	377291	443206	328377	372677	491600	588082	446616	475177	425689	412625	551388	454708	366528	243770	361745	718583	485864
O75150	E3 ubiquitin-protein ligase BRE1B (BRE1-B) (EC 2.3.2.27) (95 kDa retinoblastoma-associated protein) (RBP95) (RING finger protein 40) (RING-type E3 ubiquitin transferase BRE1B)	RNF40	RNF40 BRE1B KIAA0661	1001	3	408615	565591	618190	473474	375475	473632	550069	577085	496925	467639	541091	543503	540161	378792	548833	270032	391539	486219	450779	630269	455357	392186	376974	492168	513325	476441	668386	468429	579508	403589	320666	540196	566687	386896	450679	398090	464241	489782	482577	414228	294047	412907	526350	308925
O75152	Zinc finger CCCH domain-containing protein 11A	ZC3H11A	ZC3H11A KIAA0663 ZC3HDC11A	810	2	242090	284877	316166	322372	290490	292053	381243	429634	338676	325665	322047	372498	433912	300670	373036	180157	247032	324190	275592	332677	241771	211918	243539	336435	276992	259194	305029	246224	296261	222247	232579	311119	309917	312911	344231	240719	249857	332960	330367	255220	180762	281845	419886	222187
O75153	Clustered mitochondria protein homolog	CLUH	CLUH KIAA0664	1309	2	111436	122487	173546	90729	87445	178054	146709	110580	114200	81403.8	128389	96284.7	68435.7	128778	110238	74035.4	104704	92879.1	114440	96693	178823	140085	126014	141249	86839.3	128832	124760	84055.2	120165	110075	88766.6	85212.4	172928	120156	150124	132222	110770	94292.2	112925	117855	77722.8	140118	75440	112425
O75165	DnaJ homolog subfamily C member 13 (Required for receptor-mediated endocytosis 8) (RME-8)	DNAJC13	DNAJC13 KIAA0678 RME8	2243	5	131385	157414	620416	289368	326053	634589	428261	379723	230139	202703	231237	230136	284238	737717	180418	383748	464106	143747	749312	287068	953836	663881	739540	517043	474419	590890	672174	553443	703695	427961	192501	159078	551655	418142	310032	432275	360532	258312	261546	219969	115260	189430	258950	516734
O75170	Serine/threonine-protein phosphatase 6 regulatory subunit 2 (SAPS domain family member 2)	PPP6R2	PPP6R2 KIAA0685 PP6R2 SAPS2	966	3	575944	460907	359164	310065	265242	364040	387131	454929	372033	395817	402609	345843	377345	589176	538845	429820	484012	473450	279709	358999	259247	224336	226026	214007	282393	283547	376572	257772	264377	222849	583360	469534	436475	280592	355973	322955	315067	504026	420058	296430	191667	357106	443462	541486
O75175	CCR4-NOT transcription complex subunit 3 (CCR4-associated factor 3) (Leukocyte receptor cluster member 2)	CNOT3	CNOT3 KIAA0691 LENG2 NOT3	753	2	80792.7	162620	164457	127736	89387.1	156850	188840	159385	134873	100923	160302	177380	135538	193740	143858	170661	137207	108180	165787	221337	176747	158336	135596	136048	142886	132620	187799	134965	163235	103120	66604.8	108663	151907	118063	109786	119070	101973	88566.1	167460	96564.3	84335.1	91286.2	140028	134203
O75191	Xylulose kinase (Xylulokinase) (EC 2.7.1.17)	XYLB	XYLB	536	2	189491	331774	295381	247167	239826	239535	263574	358401	228674	311940	321677	265681	321502	348774	315461	202824	236856	265635	253592	354559	256874	212659	191540	217969	305381	248470	327133	228632	240508	174965	214906	260999	267583	229474	278012	235573	247039	277440	270746	237805	141618	219946	318201	262760
O75208	Ubiquinone biosynthesis protein COQ9, mitochondrial	COQ9	COQ9 C16orf49 HSPC326 PSEC0129	318	2	38010.7	33325	44098.9	29117.8	30727.2	49819.8	53363.2	54983.8	34404.2	33822.2	44544	23115.8	28817.2	59772.5	50211.9	45006.8	48727.7	31242.7	83706.5	70979.8	79454.7	56742.7	70820.6	82917.1	37518	46602.5	63046.9	62158.9	42653.6	46959.9	20720.1	25483.9	35614.8	35335.6	31050	40840.4	50819.8	25669.4	35017.2	30132.6	6924.49	27580.1	28275.7	51876.1
O75223	Gamma-glutamylcyclotransferase (EC 4.3.2.9) (Cytochrome c-releasing factor 21)	GGCT	GGCT C7orf24 CRF21	188	4	59868.2	52968.4	78137.9	115358	98446.8	151658	52647.9	46158.8	51814.2	108630	110317	126108	63957	100890	76149.6	65300.3	53276.3	87881.3	170175	91875.5	204978	182964	128098	117622	88290.1	122315	142546	94942.7	120411	108556	62296.1	37189.2	67739	112957	98687.8	100229	54247	79447	71595.4	88005.4	43265.2	54663.1	64899.5	80992.5
O75306	NADH dehydrogenase [ubiquinone] iron-sulfur protein 2, mitochondrial (EC 1.6.5.3) (EC 1.6.99.3) (Complex I-49kD) (CI-49kD) (NADH-ubiquinone oxidoreductase 49 kDa subunit)	NDUFS2	NDUFS2	463	4	66951.3	153048	131705	102457	84424.2	111037	129016	156777	116780	134946	138072	122512	158483	122605	139587	77514.6	104898	125637	135304	184690	104700	116174	90244.9	118822	133762	112990	212948	117733	130222	86629	79098.8	146803	142026	109634	108667	93550.1	134535	135477	141377	92928.3	55380.6	103581	155587	103863
O75323	Protein NipSnap homolog 2 (NipSnap2) (Glioblastoma-amplified sequence)	NIPSNAP2	NIPSNAP2 GBAS	286	5	145558	106933	170934	201490	160867	234591	213389	198252	160476	164808	196444	230651	161090	255081	194807	160860	196346	134907	284712	203757	294961	208329	206371	224608	189497	211978	271133	177680	196565	177795	125673	90011.4	121740	193899	158902	189170	176746	120575	162201	125528	89639	157421	127510	175268
O75340	Programmed cell death protein 6 (Apoptosis-linked gene 2 protein homolog) (ALG-2)	PDCD6	PDCD6 ALG2	191	6	87299.3	68096.5	118600	122899	93464	153072	101911	112031	89884.9	108047	146104	123179	60988.8	156429	98139.7	106342	102469	72449	146714	88959.4	164165	127137	101272	114229	120822	145442	141430	102015	127552	96158.1	71087.9	61044.1	112157	125819	112556	117547	72927.3	73623.7	88296.2	93042.3	48044.9	72178.3	88859.1	149083
O75347	Tubulin-specific chaperone A (TCP1-chaperonin cofactor A) (Tubulin-folding cofactor A) (CFA)	TBCA	TBCA	108	2	146464	97345.9	161166	223513	204480	276077	137242	133588	123149	173589	155945	172785	118444	209671	207481	193484	189300	119585	245290	131024	228737	210887	164715	182654	153370	188772	165581	141186	156379	144348	157791	116988	186526	227169	240675	252514	145883	163193	135113	144472	120299	141347	138786	243203
O75348	V-type proton ATPase subunit G 1 (V-ATPase subunit G 1) (V-ATPase 13 kDa subunit 1) (Vacuolar proton pump subunit G 1) (Vacuolar proton pump subunit M16)	ATP6V1G1	ATP6V1G1 ATP6G ATP6G1 ATP6J	118	4	562276	288693	320053	306980	277745	382188	355642	382773	271808	321608	603593	316765	312428	342979	397152	272590	336625	193889	282228	365166	369348	304489	319013	595082	550943	287119	468921	559830	693143	447318	458959	296476	347058	307214	298995	297265	264477	234107	307766	241271	119249	210209	306099	298805
O75351	Vacuolar protein sorting-associated protein 4B (EC 3.6.4.6) (Cell migration-inducing gene 1 protein) (Suppressor of K(+) transport growth defect 1) (Protein SKD1)	VPS4B	VPS4B SKD1 VPS42 MIG1	444	3	1.13349e+06	1.46757e+06	1.27225e+06	1.24191e+06	1.03714e+06	1.3594e+06	1.237e+06	1.41009e+06	1.09174e+06	1.22744e+06	1.30928e+06	1.12368e+06	1.36069e+06	1.31672e+06	1.47326e+06	995010	1.09727e+06	1.17351e+06	1.12886e+06	1.47816e+06	1.15699e+06	868746	888975	1.16305e+06	1.19037e+06	1.07569e+06	1.54486e+06	1.10297e+06	1.30817e+06	919710	1.11891e+06	1.35028e+06	1.40549e+06	1.17604e+06	1.31167e+06	1.15163e+06	974774	1.18098e+06	1.15973e+06	1.01302e+06	635728	1.02272e+06	1.50466e+06	1.37041e+06
O75356	Ectonucleoside triphosphate diphosphohydrolase 5 (NTPDase 5) (EC 3.6.1.6) (CD39 antigen-like 4) (ER-UDPase) (Guanosine-diphosphatase ENTPD5) (GDPase ENTPD5) (EC 3.6.1.42) (Nucleoside diphosphatase) (Uridine-diphosphatase ENTPD5) (UDPase ENTPD5)	ENTPD5	ENTPD5 CD39L4 PCPH	428	5	34645.1	24133.3	41384.4	63827.5	47588.5	114635	60436.6	65017.3	41311.2	41229.6	62591.3	59489.1	30683.6	85903.1	57772	53309.5	50091.4	44186.2	97161.9	70531.4	79483.6	97254.1	58114	91042.3	41598.9	73086.1	70361.1	63344.2	78360.4	40026.2	29730.8	36202.7	48263.6	66421.8	50293.2	76204.8	46125.2	27716.5	51977.8	37404	10118.8	31856.4	25093.7	58764.3
O75362	Zinc finger protein 217	ZNF217	ZNF217 ZABC1	1048	2	364016	307394	433575	445856	386748	499720	328634	365110	259269	355127	429054	415238	259902	609007	406542	349124	372304	266515	500411	305320	533535	486716	397563	456978	277510	364741	434981	348640	314739	324694	337100	263389	413963	371451	575734	516597	280763	305279	331729	347954	179015	263689	236952	492090
O75363	Breast carcinoma-amplified sequence 1 (Amplified and overexpressed in breast cancer) (Novel amplified in breast cancer 1)	BCAS1	BCAS1 AIBC1 NABC1	584	3	246170	188728	207822	197811	173506	214494	211251	266551	215264	263106	228947	230585	229462	329943	276245	213482	236039	205478	192135	199013	214806	202642	156774	203732	199098	164836	270314	186416	194891	161621	207818	185225	220560	236966	201211	183195	184319	216892	229542	186511	139273	176325	272473	205616
O75367	Core histone macro-H2A.1 (Histone macroH2A1) (mH2A1) (Histone H2A.y) (H2A/y) (Medulloblastoma antigen MU-MB-50.205)	H2AFY	H2AFY MACROH2A1	372	9	174515	84397.1	113631	136883	131116	169464	119314	99359.7	102461	116527	120078	106959	76039.3	122660	152607	98454.9	87284.3	78647.5	186643	95708.2	211118	153273	124293	134918	126291	132778	165866	113143	126181	99293.9	157235	71821.9	119544	143097	147083	135012	86978.1	88777.3	113599	93789.6	54375.5	78820.6	71143.8	105305
O75368	SH3 domain-binding glutamic acid-rich-like protein	SH3BGRL	SH3BGRL	114	7	346605	496678	635775	458091	333907	496564	452696	493701	396726	504905	417666	476384	477483	511665	478264	307054	353532	396014	323345	533029	407579	332672	372366	480439	412788	414802	592239	360667	458739	344065	332594	432101	616863	391407	388170	420247	395110	508477	421981	395686	215170	378879	505206	404367
O75369	Filamin-B (FLN-B) (ABP-278) (ABP-280 homolog) (Actin-binding-like protein) (Beta-filamin) (Filamin homolog 1) (Fh1) (Filamin-3) (Thyroid autoantigen) (Truncated actin-binding protein) (Truncated ABP)	FLNB	FLNB FLN1L FLN3 TABP TAP	2602	48	183831	166022	284973	321575	301263	443595	188072	212683	165552	176917	179781	162346	179838	428018	200837	205919	234438	155299	303048	183051	343948	312213	211198	232833	203289	232601	257166	206729	193877	153295	179231	141498	272285	314537	331706	339574	152376	167671	181656	140307	92944.3	135962	165585	312218
O75376	Nuclear receptor corepressor 1 (N-CoR) (N-CoR1)	NCOR1	NCOR1 KIAA1047	2440	2	300189	296854	307316	312224	254797	424963	316452	446772	258712	361503	411816	342626	361244	408918	418425	261396	336078	285933	312916	422750	375810	351686	248976	304732	315933	287089	390825	274986	330500	265196	274389	299217	351157	247136	276312	327984	272855	338891	390380	270454	161488	296481	377777	396902
O75380	NADH dehydrogenase [ubiquinone] iron-sulfur protein 6, mitochondrial (Complex I-13kD-A) (CI-13kD-A) (NADH-ubiquinone oxidoreductase 13 kDa-A subunit)	NDUFS6	NDUFS6	124	2	101707	87497.4	112682	137195	145023	156392	116514	126251	84880.9	124309	104241	90165.8	98493	145837	121703	107343	106979	87807.8	101782	55813.3	152639	138063	90746.6	134947	110280	133864	143381	102102	116375	114386	117661	99550.4	115533	135834	93918.4	137916	82447.5	90181.4	92962.4	149470	144672	99954.3	92852.9	117762
O75382	Tripartite motif-containing protein 3 (Brain-expressed RING finger protein) (RING finger protein 22) (RING finger protein 97)	TRIM3	TRIM3 BERP RNF22 RNF97	744	2	369874	630400	557256	472607	372299	464533	556624	666540	472247	527498	547211	531406	609304	575187	626205	258886	383972	494944	483857	663066	447107	500627	298989	451888	513001	502234	665965	422640	490700	312426	264751	528854	571210	361105	463688	400084	385094	532545	519685	329187	230014	400924	622478	481068
O75385	Serine/threonine-protein kinase ULK1 (EC 2.7.11.1) (Autophagy-related protein 1 homolog) (ATG1) (hATG1) (Unc-51-like kinase 1)	ULK1	ULK1 KIAA0722	1050	3	7741.72	6232.41	17161.8	5616.9	9287.74	8877.13	8651.47	15833.9	7745.2	8090.45	10079.8	9835.84	5875.99	10115.1	12379.1	11654.6	10375.8	6854.67	18860.7	18257.6	20675.5	16088.6	13115.2	18148.6	8857.8	16892.4	18442	21359.3	22916.2	16253	7169.66	3745.9	11480.8	7333.36	7615.45	14431.2	9260.36	5455.27	8867.43	8081.99	5317.05	7432.1	6134.48	10594
O75390	Citrate synthase, mitochondrial (EC 2.3.3.1) (Citrate (Si)-synthase)	CS	CS	466	11	127883	96214.7	146711	158152	136338	207084	125142	151628	104273	140426	137468	120795	103489	203852	165891	127170	155838	97287	202980	142250	227851	181086	149544	169142	140565	173824	209078	139809	161101	108202	113817	99288.7	125776	135515	163903	149912	99758.4	105131	112577	100703	53613.4	95583.1	95991.9	141419
O75396	Vesicle-trafficking protein SEC22b (ER-Golgi SNARE of 24 kDa) (ERS-24) (ERS24) (SEC22 vesicle-trafficking protein homolog B) (SEC22 vesicle-trafficking protein-like 1)	SEC22B	SEC22B SEC22L1	215	6	63798.5	87665	100961	145091	126776	131244	80943	128722	67000.6	93516.5	98785.6	68561.2	62580.1	124406	93045.6	67380.1	75393	65078.7	170406	88557.8	185265	121991	94383.6	99733.5	88234.5	107967	148333	80846.5	103027	65790	78735.2	56939.3	102195	119582	110499	94554.3	57376.5	92953.8	109027	61750.4	38151.8	53806.2	107809	92265.2
O75400	Pre-mRNA-processing factor 40 homolog A (Fas ligand-associated factor 1) (Formin-binding protein 11) (Formin-binding protein 3) (Huntingtin yeast partner A) (Huntingtin-interacting protein 10) (HIP-10) (Huntingtin-interacting protein A) (Renal carcinoma antigen NY-REN-6)	PRPF40A	PRPF40A FBP11 FLAF1 FNBP3 HIP10 HYPA HSPC225	957	5	457321	373374	444485	478898	355324	561719	423765	452192	382065	471382	521797	453377	322724	653582	519945	439790	529043	378644	504999	481878	501522	425752	418775	475296	392630	378368	575299	367595	383306	325345	434589	467260	469628	432713	389981	414138	353901	398997	431725	293875	202454	329161	365867	539112
O75420	GRB10-interacting GYF protein 1 (PERQ amino acid-rich with GYF domain-containing protein 1)	GIGYF1	GIGYF1 CDS2 PERQ1 PP3360	1035	2	374930	500349	447723	443551	333877	431313	377241	474052	342749	430715	370768	361527	436174	427210	478695	296271	332479	368244	372245	478881	362738	356009	317728	390790	388291	387353	489974	329184	398177	298086	422789	557112	460060	390254	394907	480086	321225	462826	422206	277697	233618	398468	527856	410506
O75427	Leucine-rich repeat and calponin homology domain-containing protein 4 (Leucine-rich repeat neuronal protein 4) (Leucine-rich neuronal protein)	LRCH4	LRCH4 LRN LRRN1 LRRN4	683	2	566308	478525	535746	801805	556405	877957	569814	649089	465847	714221	693546	643860	446219	935980	738469	659421	666720	419357	807210	655986	895543	718273	682701	747203	582859	703886	823636	609444	649765	671765	574900	365734	710107	826785	543306	587357	520676	472452	508983	552160	298998	548701	482919	769899
O75436	Vacuolar protein sorting-associated protein 26A (Vesicle protein sorting 26A) (hVPS26)	VPS26A	VPS26A VPS26	327	3	606363	519390	754193	676792	687530	781332	789507	703592	545053	648174	640585	956491	621401	896290	741223	554249	600983	766575	706033	666113	723439	590421	502694	612787	755444	625084	849409	555076	696733	477903	564474	511309	662459	641512	878937	620201	455243	868302	553486	651524	491869	464973	615192	686664
O75439	Mitochondrial-processing peptidase subunit beta (EC 3.4.24.64) (Beta-MPP) (P-52)	PMPCB	PMPCB MPPB	489	4	413208	356387	373669	385181	391170	504955	363630	427494	317119	403886	424850	394275	314613	552602	447315	364234	409407	352623	367935	403644	423439	417105	327599	358131	365641	379900	444978	311389	331499	310113	402795	419959	450370	344645	383689	379299	282596	388926	401194	285601	190776	285020	313777	398062
O75448	Mediator of RNA polymerase II transcription subunit 24 (Activator-recruited cofactor 100 kDa component) (ARC100) (Cofactor required for Sp1 transcriptional activation subunit 4) (CRSP complex subunit 4) (Mediator complex subunit 24) (Thyroid hormone receptor-associated protein 4) (Thyroid hormone receptor-associated protein complex 100 kDa component) (Trap100) (hTRAP100) (Vitamin D3 receptor-inte…	MED24	MED24 ARC100 CRSP4 DRIP100 KIAA0130 THRAP4 TRAP100	989	3	340281	216706	433710	478568	370235	611966	335540	374766	385604	450239	517567	407712	218720	593573	423331	357152	361454	244343	550686	385697	584150	549352	420471	478813	416302	478989	658407	408266	455295	345323	252502	261661	408706	348303	387882	460698	262257	362783	349008	350107	153853	284863	308086	384367
O75475	PC4 and SFRS1-interacting protein (CLL-associated antigen KW-7) (Dense fine speckles 70 kDa protein) (DFS 70) (Lens epithelium-derived growth factor) (Transcriptional coactivator p75/p52)	PSIP1	PSIP1 DFS70 LEDGF PSIP2	530	2	249974	149678	300040	157715	159328	266758	228402	215316	187823	219702	191664	152859	152615	378751	221172	330054	231976	199735	170250	189643	231649	144657	99613.2	211817	216984	149768	248805	167436	154302	117275	237035	175162	199640	168454	241613	249436	179042	238913	205591	154351	91252.2	158161	158823	240004
O75487	Glypican-4 (K-glypican) [Cleaved into: Secreted glypican-4]	GPC4	GPC4 UNQ474/PRO937	556	2	256296	220976	220425	219601	149331	241143	152224	224721	188592	241898	208641	215952	208578	299670	219213	200455	229443	248060	176104	229724	198320	195748	216505	170060	158700	206691	236585	207423	173782	134993	234120	285667	255713	213564	286392	209275	179886	233798	199292	200518	117728	261174	222069	258466
O75489	NADH dehydrogenase [ubiquinone] iron-sulfur protein 3, mitochondrial (EC 1.6.5.3) (EC 1.6.99.3) (Complex I-30kD) (CI-30kD) (NADH-ubiquinone oxidoreductase 30 kDa subunit)	NDUFS3	NDUFS3	264	10	80964.4	70305.4	99459.5	129077	82575.9	147687	121652	125771	78241.9	86384.7	111692	114721	96333.4	116606	110738	93866.9	101473	68878.1	156130	131372	156683	113903	124141	128284	98326.9	123808	155272	105456	113208	106313	64802.6	55751.1	93401.8	124557	92021.2	108771	82059.7	66711.5	74085.9	68501.9	33860.8	70382.7	66376	94821.2
O75506	Heat shock factor-binding protein 1 (Nasopharyngeal carcinoma-associated antigen 13) (NPC-A-13)	HSBP1	HSBP1 HSF1BP	76	3	38655.1	18492.7	87472.5	54927	38643.1	85995.9	66630.3	81289	56856.7	77508.4	125979	83328.7	43459.6	110542	41528.6	51225.2	54323.9	40704.9	106454	55519.3	103954	100957	66974.5	70453.9	93287.6	79754.9	90613.4	62714.5	72512.4	60872.7	38916.5	24619.7	76459.3	57416.6	55311.5	67551.7	59898.9	43600.4	58706.6	78728.2	34187.3	61284.4	28295.2	78939.5
O75521	Enoyl-CoA delta isomerase 2, mitochondrial (EC 5.3.3.8) (DRS-1) (Delta(3),delta(2)-enoyl-CoA isomerase) (D3,D2-enoyl-CoA isomerase) (Diazepam-binding inhibitor-related protein 1) (DBI-related protein 1) (Dodecenoyl-CoA isomerase) (Hepatocellular carcinoma-associated antigen 88) (Peroxisomal 3,2-trans-enoyl-CoA isomerase) (pECI) (Renal carcinoma antigen NY-REN-1)	ECI2	ECI2 DRS1 HCA88 PECI	394	5	62781.6	84749.8	104064	132858	99733.1	151990	106221	107563	81282.7	127069	134607	130523	94253.4	143952	111142	80484.7	100830	99882	176042	123965	194629	160320	130500	131027	127258	134646	153125	121853	133599	90730.8	68401.8	73409.4	110881	117033	127353	128188	74553.8	72911.2	109998	87716.2	53915.6	100048	76159.5	106563
O75531	Barrier-to-autointegration factor (Breakpoint cluster region protein 1) [Cleaved into: Barrier-to-autointegration factor, N-terminally processed]	BANF1	BANF1 BAF BCRG1	89	5	278709	198150	282760	304518	257123	335370	218401	245610	207168	264178	244105	239714	201977	363027	288589	239642	257289	194370	217836	180423	253540	246519	188042	243579	206158	233056	258433	151385	215369	179975	164269	185431	260440	249491	282260	239803	187926	228515	219606	214769	108135	180236	224017	267925
O75533	Splicing factor 3B subunit 1 (Pre-mRNA-splicing factor SF3b 155 kDa subunit) (SF3b155) (Spliceosome-associated protein 155) (SAP 155)	SF3B1	SF3B1 SAP155	1304	12	202510	172096	197760	294751	274679	348027	223547	303461	208384	251284	251515	233790	198954	378574	250509	220986	228891	182263	301867	250386	344922	293568	240203	253173	233005	239282	308622	220292	254333	178479	262493	162932	241738	299246	315496	282829	189574	236177	218408	187616	121627	216149	231331	265296
O75534	Cold shock domain-containing protein E1 (N-ras upstream gene protein) (Protein UNR)	CSDE1	CSDE1 D1S155E KIAA0885 NRU UNR	798	5	664169	566426	516172	486486	578848	520184	515873	602175	481104	580678	542963	566164	544475	698658	640538	589377	652522	534872	497485	533473	512876	475332	413282	491776	481884	455200	630155	409777	458656	397825	615974	536734	596052	622182	543769	517434	446433	548074	601613	536560	292167	477244	562566	702480
O75569	Interferon-inducible double-stranded RNA-dependent protein kinase activator A (PKR-associated protein X) (PKR-associating protein X) (Protein activator of the interferon-induced protein kinase) (Protein kinase, interferon-inducible double-stranded RNA-dependent activator)	PRKRA	PRKRA PACT RAX HSD-14 HSD14	313	3	79625.3	72141.1	98026.7	83789.9	79979	145138	93677.7	96448.9	61113.1	63850.5	99813	83232	54339.4	125216	97321	72707.1	71058	62213.9	159679	105260	165541	126576	84744.4	118355	113589	114942	152076	111542	111571	83684.8	61895.3	69431.1	81141.8	122528	95720.4	106507	83074.6	53938.1	103978	61030.5	28455	58786.8	62667.2	72425.3
O75592	E3 ubiquitin-protein ligase MYCBP2 (EC 2.3.2.27) (Myc-binding protein 2) (Pam/highwire/rpm-1 protein) (Protein associated with Myc) (RING-type E3 ubiquitin transferase MYCBP2)	MYCBP2	MYCBP2 KIAA0916 PAM	4640	8	301312	678824	544777	436297	356609	428891	583943	637025	430411	536053	527452	539358	590400	344212	581273	239181	371394	450604	362540	666579	385429	288351	293524	437916	469366	386047	654664	424900	479186	317496	304719	453952	480793	398158	444493	349576	392676	530621	493769	388776	247512	413548	668953	275047
O75608	Acyl-protein thioesterase 1 (APT-1) (hAPT1) (EC 3.1.2.-) (Lysophospholipase 1) (Lysophospholipase I) (LPL-I) (LysoPLA I)	LYPLA1	LYPLA1 APT1 LPL1	230	4	172732	109626	153881	201108	190564	297665	116620	150530	97798.8	161061	175432	133510	105951	201014	162368	143801	138346	96976.4	243921	167518	257257	241300	167007	212598	231428	219096	289298	213346	209513	169701	154827	102093	176564	199039	232893	248167	94306.1	131431	132676	138324	89942.3	120524	123887	173528
O75643	U5 small nuclear ribonucleoprotein 200 kDa helicase (EC 3.6.4.13) (Activating signal cointegrator 1 complex subunit 3-like 1) (BRR2 homolog) (U5 snRNP-specific 200 kDa protein) (U5-200KD)	SNRNP200	SNRNP200 ASCC3L1 HELIC2 KIAA0788	2136	16	58981.1	53694.9	86719	71023.3	58962.6	112596	80761.4	87303.6	57486.4	89720.9	115103	91489.9	50477.6	107920	94538.2	63770.2	72429.2	53662.8	141047	90185.1	156565	121134	101075	108988	75640.6	108096	136945	87364.7	105602	73328	49016.2	51822.7	76807.6	83978.6	70398.8	71940.4	60391.4	42526	51702.3	76140.3	29717.4	49517.6	66056.9	73406
O75676	Ribosomal protein S6 kinase alpha-4 (S6K-alpha-4) (EC 2.7.11.1) (90 kDa ribosomal protein S6 kinase 4) (Nuclear mitogen- and stress-activated protein kinase 2) (Ribosomal protein kinase B) (RSKB)	RPS6KA4	RPS6KA4 MSK2	772	2	848985	1.13299e+06	1.07556e+06	944282	845202	951179	1.02905e+06	1.20157e+06	1.04569e+06	990965	990930	944440	1.03158e+06	840626	1.15533e+06	399834	769166	902960	701818	1.16123e+06	779677	652811	634654	826254	852707	884159	1.11043e+06	843498	877957	747328	695107	1.03972e+06	1.19834e+06	860769	795138	788447	922165	1.14155e+06	1.05234e+06	731215	599343	861573	1.1618e+06	661700
O75691	Small subunit processome component 20 homolog (Down-regulated in metastasis protein) (Novel nucleolar protein 73) (NNP73) (Protein Key-1A6)	UTP20	UTP20 DRIM	2785	3	70907.4	59755.1	93450.5	131225	72580	117146	123274	121741	74078.1	55079.9	99927.9	97697.7	44989.8	137574	114196	100281	92720.7	64952	136870	130061	124153	82478.6	124860	117694	84598.2	93899.9	130722	94598.6	82572.7	84311.7	67143.5	48932.2	74091.4	119658	63933.4	73095.7	84118.4	56227.3	66692.4	59176.2	25735.9	67087.7	41047.5	97973.5
O75694	Nuclear pore complex protein Nup155 (155 kDa nucleoporin) (Nucleoporin Nup155)	NUP155	NUP155 KIAA0791	1391	4	453847	863785	916706	686752	543864	713056	792152	1.08907e+06	707200	739133	800042	714863	1.15768e+06	607168	932309	497047	621411	815132	522603	857151	584131	434208	414463	587121	648226	619995	931447	589713	721197	473754	443658	904834	784770	586887	665873	593533	629044	865730	733722	517615	358396	590206	1.05132e+06	537832
O75746	Calcium-binding mitochondrial carrier protein Aralar1 (Mitochondrial aspartate glutamate carrier 1) (Solute carrier family 25 member 12)	SLC25A12	SLC25A12 ARALAR1	678	5	190067	110542	196685	201915	129528	225437	214107	246186	142507	196082	232167	224730	97559.6	282570	189185	170129	190141	107062	283772	202006	303565	229368	226120	222170	206041	214335	264236	183540	163119	169288	166938	111247	210831	188695	189985	216390	139416	135455	155387	160145	82514.3	129520	117743	220905
O75787	Renin receptor (ATPase H(+)-transporting lysosomal accessory protein 2) (ATPase H(+)-transporting lysosomal-interacting protein 2) (ER-localized type I transmembrane adaptor) (Embryonic liver differentiation factor 10) (N14F) (Renin/prorenin receptor) (Vacuolar ATP synthase membrane sector-associated protein M8-9) (ATP6M8-9) (V-ATPase M8.9 subunit)	ATP6AP2	ATP6AP2 ATP6IP2 CAPER ELDF10 HT028 MSTP009 PSEC0072	350	2	414427	228707	387292	404052	451623	444943	360844	439798	229386	371958	366430	268325	338061	469034	433722	379666	317679	330573	413529	344336	385886	537477	354383	356035	347384	454712	547700	376084	371403	244978	352543	293841	369252	420413	325127	415305	215745	269910	429742	283367	257020	421952	306423	547311
O75791	GRB2-related adapter protein 2 (Adapter protein GRID) (GRB-2-like protein) (GRB2L) (GRBLG) (GRBX) (Grf40 adapter protein) (Grf-40) (Growth factor receptor-binding protein) (Hematopoietic cell-associated adapter protein GrpL) (P38) (Protein GADS) (SH3-SH2-SH3 adapter Mona)	GRAP2	GRAP2 GADS GRB2L GRID	330	2	262805	711778	658113	411553	300824	410545	630227	788228	544826	578332	582434	624557	681829	332821	595145	202408	317411	506527	362843	865126	400608	291339	313201	500617	562388	402085	822393	503730	577821	344669	191079	672454	617033	375666	316146	258988	487446	475534	405362	359566	205867	343708	764743	283566
O75821	Eukaryotic translation initiation factor 3 subunit G (eIF3g) (Eukaryotic translation initiation factor 3 RNA-binding subunit) (eIF-3 RNA-binding subunit) (Eukaryotic translation initiation factor 3 subunit 4) (eIF-3-delta) (eIF3 p42) (eIF3 p44)	EIF3G	EIF3G EIF3S4	320	5	141519	94158.6	129322	184359	132045	206370	146277	161307	115024	130719	164562	147356	97742.3	248765	163895	141992	143863	128888	211763	144112	235806	179334	158055	146566	139855	163387	180165	154923	160037	132273	115670	91183.9	154398	159721	172851	147727	111478	99164.3	103089	100151	57945.1	105273	131459	164386
O75828	Carbonyl reductase [NADPH] 3 (EC 1.1.1.184) (NADPH-dependent carbonyl reductase 3) (Short chain dehydrogenase/reductase family 21C member 2)	CBR3	CBR3	277	4	314791	322745	413253	523609	395724	588422	462680	494222	361202	419005	460719	416170	300429	552276	326518	343898	375071	309991	566377	446070	593879	451713	431990	468027	430269	468831	583273	404182	439280	410273	306328	362443	409658	489850	367135	424078	350263	277522	321669	335484	165935	273938	242259	360585
O75832	26S proteasome non-ATPase regulatory subunit 10 (26S proteasome regulatory subunit p28) (Gankyrin) (p28(GANK))	PSMD10	PSMD10	226	3	132161	132790	158054	172366	106223	167844	168133	167150	136577	152561	179527	304165	118141	267318	185112	149753	159707	119879	171639	146150	170950	148781	140912	164473	31688	149828	188535	140352	154024	111820	122810	112880	170855	162896	157052	142393	154589	183988	169783	233731	87477.1	178128	183755	159331
O75844	CAAX prenyl protease 1 homolog (EC 3.4.24.84) (Farnesylated proteins-converting enzyme 1) (FACE-1) (Prenyl protein-specific endoprotease 1) (Zinc metalloproteinase Ste24 homolog)	ZMPSTE24	ZMPSTE24 FACE1 STE24	475	3	216590	172080	204156	312830	181285	275933	315248	280926	218714	153856	219626	260561	159137	351841	299002	263709	278506	198455	330196	282298	326594	236039	319588	285906	223846	254421	300677	215566	225326	260885	184070	160974	198280	281780	220634	242477	250189	218828	212349	113317	99614.6	207610	160915	278722
O75874	Isocitrate dehydrogenase [NADP] cytoplasmic (IDH) (EC 1.1.1.42) (Cytosolic NADP-isocitrate dehydrogenase) (IDP) (NADP(+)-specific ICDH) (Oxalosuccinate decarboxylase)	IDH1	IDH1 PICD	414	8	141455	182326	286019	284076	221846	329912	240147	268021	182531	356089	372564	311423	161765	317601	204254	189996	211891	184599	412232	263855	427922	276959	282574	359353	249219	355059	326234	270186	281548	234801	142082	166770	264835	252212	228439	262825	171496	190165	177155	266251	142940	201690	169486	228727
O75879	Glutamyl-tRNA(Gln) amidotransferase subunit B, mitochondrial (Glu-AdT subunit B) (EC 6.3.5.-) (Cytochrome c oxidase assembly factor PET112 homolog)	GATB	GATB PET112 PET112L HSPC199	557	2	89564.7	90123.7	70828.9	98314.5	30227.2	171477	96125.8	102677	69876	76805.2	101290	82705.2	50943.7	155331	124588	117413	112368	96737	91392.4	127385	140478	113761	82370.2	118989	78930.2	81245.6	157853	97167.2	106761	88504.1	44926.8	89939.2	109270	90110.4	88602.2	76847.6	76653.9	43244.4	118846	73748.2	6532.22	62844.1	44031.5	25991.5
O75880	Protein SCO1 homolog, mitochondrial	SCO1	SCO1 SCOD1	301	2	177415	187066	146088	166044	151682	212301	151163	161065	125661	149146	172022	173178	259204	221200	341916	163224	148618	156031	240245	283276	176502	197537	91743.1	205671	104117	174287	418096	226184	172767	86215.5	120434	303303	184057	142108	160935	141532	79417.9	233605	29247.8	130356	65789.1	120690	235608	127305
O75891	Cytosolic 10-formyltetrahydrofolate dehydrogenase (10-FTHFDH) (FDH) (EC 1.5.1.6) (Aldehyde dehydrogenase family 1 member L1)	ALDH1L1	ALDH1L1 FTHFD	902	4	206607	235320	319159	164907	168275	250855	211200	212559	210900	204436	203836	204800	383121	323761	243679	228332	271323	216139	162112	186135	210333	181837	135674	169249	188708	181441	272640	169677	205035	160949	247237	227806	329471	191994	248739	158728	157143	222943	248530	176115	103382	166471	230258	279722
O75915	PRA1 family protein 3 (ADP-ribosylation factor-like protein 6-interacting protein 5) (ARL-6-interacting protein 5) (Aip-5) (Cytoskeleton-related vitamin A-responsive protein) (Dermal papilla-derived protein 11) (GTRAP3-18) (Glutamate transporter EAAC1-interacting protein) (JM5) (Prenylated Rab acceptor protein 2) (Protein JWa) (Putative MAPK-activating protein PM27)	ARL6IP5	ARL6IP5 DERP11 JWA PRA2 PRAF3 HSPC127	188	3	156677	153061	331954	280245	221913	427331	294853	253732	175046	184608	227736	215797	163378	429972	226618	286332	257271	172224	438078	261783	499170	325445	303978	277406	273449	316788	393986	276592	357151	247203	144743	149053	295949	268886	237398	283546	180343	121654	202143	166717	63373.5	136620	165093	299734
O75923	Dysferlin (Dystrophy-associated fer-1-like protein) (Fer-1-like protein 1)	DYSF	DYSF FER1L1	2080	2	146916	118463	156762	224773	190282	265951	163751	242361	147220	332560	314550	262745	184047	207931	152964	130860	199043	124422	239138	182008	256515	187084	133625	194408	196769	197535	295286	168479	261622	173285	115688	148328	179926	194796	203239	213608	130806	159840	133399	243135	142168	147838	159158	186119
O75934	Pre-mRNA-splicing factor SPF27 (Breast carcinoma-amplified sequence 2) (DNA amplified in mammary carcinoma 1 protein) (Spliceosome-associated protein SPF 27)	BCAS2	BCAS2 DAM1	225	3	245942	233194	255949	283085	346704	350651	293194	273039	238766	290361	267187	257453	223414	385415	329448	237841	260391	222128	265229	207100	185747	307768	205321	214414	250301	283796	315414	210852	270222	224303	262565	172316	283062	267330	331981	259620	216944	119593	219236	225575	126327	244402	233489	299167
O75935	Dynactin subunit 3 (Dynactin complex subunit 22 kDa subunit) (p22)	DCTN3	DCTN3 DCTN22	186	3	506191	458538	490707	350924	378163	435559	455139	507333	324021	446527	434898	427507	510301	476596	547179	488498	533510	564019	338690	490436	430538	337224	324691	428664	397256	328566	477822	327801	391440	272246	523602	459797	620682	202125	560321	512971	317423	731202	622210	381618	343186	511266	620651	575897
O75936	Gamma-butyrobetaine dioxygenase (EC 1.14.11.1) (Gamma-butyrobetaine hydroxylase) (Gamma-BBH) (Gamma-butyrobetaine,2-oxoglutarate dioxygenase)	BBOX1	BBOX1 BBH BBOX	387	2	19924.1	18412.9	28515.3	17569	20423.3	30818.4	37582.2	40006.9	21621.3	25459.2	33595.6	27722.1	14046.4	36412.5	31990	19958.9	34930	31737.7	20912.7	30498	32874.8	25567.6	17564.7	37828.3	22583.7	20479.2	36963.5	17372.2	33578.4	18682.6	13800.6	20547.5	57050	21799.5	26654.2	25688.6	22480.7	17965.5	32138.2	18086.1	13752.9	22763.2	27083.6	38538.2
O75937	DnaJ homolog subfamily C member 8 (Splicing protein spf31)	DNAJC8	DNAJC8 SPF31 HSPC315 HSPC331	253	3	304965	297258	452797	409497	356426	500327	431351	517187	344895	453843	420528	435632	370372	502559	469099	339256	346566	310245	413136	413819	420505	372046	315401	415566	382674	394918	531153	341368	326046	292540	382104	320763	406360	395172	435799	360096	335317	374309	380380	347104	230366	366358	402408	458874
O75940	Survival of motor neuron-related-splicing factor 30 (30 kDa splicing factor SMNrp) (SMN-related protein) (Survival motor neuron domain-containing protein 1)	SMNDC1	SMNDC1 SMNR SPF30	238	2	313935	872596	749507	523854	419659	524501	782873	990102	627889	700076	750053	726576	944043	567759	787745	381091	484580	716943	246964	1.02795e+06	414847	349418	355162	601201	654664	504218	969402	563822	619557	382293	262550	798721	754926	416834	494913	432907	506111	664968	557704	435673	266972	463293	885640	359899
O75947	ATP synthase subunit d, mitochondrial (ATPase subunit d)	ATP5H	ATP5H My032	161	8	120862	72984.2	150346	143575	115074	211892	121270	140968	91760.4	129591	154660	127046	67468.1	192746	161737	122541	131000	86643.2	203393	146122	217063	155910	145806	163432	128815	114311	213708	137775	153673	129325	109520	74635	114944	120775	120017	133165	114711	82062.1	98671.2	109592	53990.3	89249.6	96942.3	137981
O75955	Flotillin-1	FLOT1	FLOT1	427	6	156446	123378	140161	170127	137556	214981	172609	180065	141214	142009	202086	167142	103908	232191	191974	156046	156406	99029.3	217146	173165	200010	168911	153870	173413	169124	162680	224766	170540	163772	139182	115028	112754	145638	182734	165137	142479	131723	114972	138876	118465	62714.3	136512	106646	174955
O75962	Triple functional domain protein (EC 2.7.11.1) (PTPRF-interacting protein)	TRIO	TRIO	3097	2	159824	232890	283606	246314	182955	217971	327768	313240	240135	205943	252039	280393	247268	242320	283946	191472	184090	211572	258180	320380	256872	229062	252199	229456	176923	203855	308637	199761	185951	169842	147995	219039	255626	210498	171846	172577	264553	211395	241094	138834	107911	185881	251550	218494
O75964	ATP synthase subunit g, mitochondrial (ATPase subunit g)	ATP5L	ATP5L	103	2	367904	240980	365898	402038	344840	517684	350328	383544	210303	482980	478147	398310	212000	621794	392337	276417	283592	270714	337158	377855	532692	472130	237494	474400	366924	427687	480628	383500	440684	373688	347293	217903	429305	427791	420338	460709	272154	338167	337584	407788	203468	314477	296500	484190
O75970	Multiple PDZ domain protein (Multi-PDZ domain protein 1)	MPDZ	MPDZ MUPP1	2070	2	127150	158551	200522	134706	122685	165574	180585	162328	171506	149719	163872	143322	263366	156297	209557	102991	132537	173409	118892	214219	130504	100803	98863.7	155997	146677	143154	238626	136678	145760	100837	112683	138096	159674	130338	134851	117784	136458	147729	165290	122783	68627	115530	288960	113570
O75976	Carboxypeptidase D (EC 3.4.17.22) (Metallocarboxypeptidase D) (gp180)	CPD	CPD	1380	3	77647.3	116474	111600	104546	102702	94883.3	107707	121561	117040	148191	157786	138118	91473.5	123518	103153	120170	86243.3	96089.5	142220	81337.6	148119	100841	90612.8	104408	82136.6	84844.7	123877	76695.1	104632	64669.3	85341	93475.9	102538	103857	86544.9	106831	94812.1	107293	96064.7	91084.7	60394.5	98171.5	57954.5	117866
O76003	Glutaredoxin-3 (PKC-interacting cousin of thioredoxin) (PICOT) (PKC-theta-interacting protein) (PKCq-interacting protein) (Thioredoxin-like protein 2)	GLRX3	GLRX3 PICOT TXNL2 HUSSY-22	335	3	155215	117976	217160	208403	116460	211041	237237	236526	129748	115726	144458	151498	117444	267193	211539	133406	137891	127882	228979	197578	243777	154475	208828	171452	162231	172841	218080	153185	149768	154016	111753	128817	144704	173222	127905	167915	153726	130882	143230	82905.7	67251.8	120858	148263	158249
O76021	Ribosomal L1 domain-containing protein 1 (CATX-11) (Cellular senescence-inhibited gene protein) (Protein PBK1)	RSL1D1	RSL1D1 CATX11 CSIG PBK1 L12	490	2	215259	283433	339407	353230	282654	296171	341309	447142	263959	337341	335797	305223	473738	315471	544046	219486	236561	299176	191256	333022	284299	209811	212559	262872	253269	242039	404751	257825	223391	190222	246344	307085	352790	313095	271068	237788	279536	384408	374158	230192	170189	251768	490890	235473
O76038	Secretagogin	SCGN	SCGN SECRET	276	2	52561.4	48953.3	44040.5	48250.1	47754	77760	41644.3	54523.1	29415.4	35720.3	51987.6	43062	43823.9	82410.8	52489.7	37270	57445.3	45843.2	44750.6	47260.6	55802.9	23151	24863.4	37872.9	36596	39831.5	54881.9	21575.4	44811.2	34247.7	62204	40593.5	56622.4	63597.3	68891.8	68180.5	35591.9	59037.6	17323.8	45705.8	31716.8	26265.7	50214.9	57007.4
O76041	Nebulette (Actin-binding Z-disk protein)	NEBL	NEBL LNEBL	1014	2	435400	199740	252729	274490	189896	392285	244970	283658	235249	269859	307544	249168	232960	412349	315619	211121	253305	217357	310242	257291	323819	296004	257069	246415	266234	259824	347078	229343	276477	205683	276273	206285	286726	317532	320116	252951	253430	313902	338806	219230	242639	271068	263563	310855
O76054	SEC14-like protein 2 (Alpha-tocopherol-associated protein) (TAP) (hTAP) (Squalene transfer protein) (Supernatant protein factor) (SPF)	SEC14L2	SEC14L2 C22orf6 KIAA1186 KIAA1658	403	4	73297.1	53865.8	132235	83412.7	71479.4	111847	70594.4	98837.2	71441.1	99717.7	113289	96713.3	93974.9	122165	83894.3	78864.2	92101.1	58255.1	108040	79318.5	124777	123851	75757.2	106620	99102.4	118267	123613	92530.4	93770.8	82479.7	81748.6	61097.5	122556	67220.3	87807.1	83591.2	58152	80707.6	92017.9	67471.5	50274.9	63805.1	91133.5	95377.7
O76070	Gamma-synuclein (Breast cancer-specific gene 1 protein) (Persyn) (Synoretin) (SR)	SNCG	SNCG BCSG1 PERSYN PRSN	127	4	182067	333587	292000	269801	150873	261892	310773	199325	263917	222792	343437	219601	401281	265327	398738	328008	107156	172734	252085	225674	236000	104592	156335	165158	196543	159087	263733	136573	110871	117401	181261	333060	367315	211831	146722	229735	239600	311881	353449	178118	112193	176645	448133	152154
O76074	cGMP-specific 3',5'-cyclic phosphodiesterase (EC 3.1.4.35) (cGMP-binding cGMP-specific phosphodiesterase) (CGB-PDE)	PDE5A	PDE5A PDE5	875	3	258673	233166	221373	254071	286047	319197	280598	339401	321880	256893	329710	228865	344722	265805	310949	228689	242361	238990	240192	276896	229743	181313	184078	261217	233653	265769	334175	193063	234195	230471	200811	302304	299315	219749	273182	264309	199602	324646	415619	206227	219197	230868	374565	259052
O76094	Signal recognition particle subunit SRP72 (SRP72) (Signal recognition particle 72 kDa protein)	SRP72	SRP72	671	5	215334	346871	379809	285626	213094	281339	316658	424643	307795	303476	324266	324058	395196	286673	340617	210107	239376	302250	248027	358439	286387	224104	206170	229875	277567	238349	410611	247694	283371	187701	202634	306352	327071	241540	262346	249765	260729	309647	308006	241398	149592	213486	387605	253029
O94760	N(G),N(G)-dimethylarginine dimethylaminohydrolase 1 (DDAH-1) (Dimethylarginine dimethylaminohydrolase 1) (EC 3.5.3.18) (DDAHI) (Dimethylargininase-1)	DDAH1	DDAH1 DDAH	285	5	161106	122534	186797	308425	280950	375470	170616	228657	164298	233356	228987	179851	147758	240115	206031	221950	189383	202652	286134	169745	333848	299859	214238	236461	187862	211129	234947	195599	237602	157266	234920	193492	214742	308456	339489	356313	102759	166381	190673	164303	110051	178027	148273	297803
O94761	ATP-dependent DNA helicase Q4 (EC 3.6.4.12) (DNA helicase, RecQ-like type 4) (RecQ4) (RTS) (RecQ protein-like 4)	RECQL4	RECQL4 RECQ4	1208	2	83297.9	100300	93789.4	97941.7	109898	112973	89423.5	94973.7	97306	103809	87506.2	93061	108689	150603	81760.9	100285	104032	68994.2	125540	76152.3	118023	101478	80668.1	107328	64193.3	92597.4	79478.2	93471.4	85276.9	63162.2	94495.7	88638.4	133396	77520.8	115108	88572.4	79570.4	66942.6	92809	86782.7	35043.3	75877.4	78650	88787.8
O94788	Retinal dehydrogenase 2 (RALDH 2) (RalDH2) (EC 1.2.1.36) (Aldehyde dehydrogenase family 1 member A2) (Retinaldehyde-specific dehydrogenase type 2) (RALDH(II))	ALDH1A2	ALDH1A2 RALDH2	518	3	100401	103400	155933	172693	107322	150841	173605	195241	144101	119576	171094	167136	101341	237528	169667	144771	152452	113608	323498	233733	286668	169877	223966	208998	171989	196060	267122	171840	169869	148810	89446.8	94517.4	140060	152702	110154	134198	147867	93807.4	134676	85518.7	41636.5	95624.5	99440.4	171339
O94804	Serine/threonine-protein kinase 10 (EC 2.7.11.1) (Lymphocyte-oriented kinase)	STK10	STK10 LOK	968	2	242089	410897	415950	288284	235476	277330	337984	455770	313391	350002	334602	326794	463631	311653	381673	201034	297155	298607	257774	430454	329667	208508	194111	269328	277685	300306	384734	241420	300827	186662	220661	412019	394262	253749	324633	278737	280058	393468	380877	270592	155973	263082	660590	265451
O94822	E3 ubiquitin-protein ligase listerin (EC 2.3.2.27) (RING finger protein 160) (RING-type E3 ubiquitin transferase listerin) (Zinc finger protein 294)	LTN1	LTN1 C21orf10 C21orf98 KIAA0714 RNF160 ZNF294 HSPC087	1766	2	146701	230618	345263	260867	203240	279060	340639	392530	282720	308594	357498	329740	250263	216869	323309	155887	153616	294741	236109	431606	252977	208340	204162	328800	324811	262708	469716	289768	356528	221276	149277	348394	331034	243952	217642	208569	259227	262833	255263	232859	129354	238553	394446	149186
O94826	Mitochondrial import receptor subunit TOM70 (Mitochondrial precursor proteins import receptor) (Translocase of outer membrane 70 kDa subunit) (Translocase of outer mitochondrial membrane protein 70)	TOMM70	TOMM70 KIAA0719 TOM70 TOMM70A	608	6	195063	147099	177964	301938	187532	241294	260933	278442	212205	171977	217231	241795	160360	319726	288016	232800	231588	174256	276556	237011	299414	241639	285873	246558	225020	239985	300112	198466	222408	223050	170197	137921	161665	273324	213436	195954	211566	201637	185128	145459	104750	197796	134742	206857
O94832	Unconventional myosin-Id	MYO1D	MYO1D KIAA0727	1006	8	95975.1	84384.9	95386	156123	110689	169171	129095	136583	89544.4	97970.8	111043	111749	72060.7	194335	125601	123189	116197	72394.3	209752	133662	199762	143291	162144	125409	118302	132226	162136	115898	118825	113775	90352.1	73391.2	101004	140782	109937	113633	97400.5	79970.9	90366.9	65065.7	34928.7	86328.7	72117.8	146824
O94855	Protein transport protein Sec24D (SEC24-related protein D)	SEC24D	SEC24D KIAA0755	1032	2	256186	335297	485073	343703	268070	374833	319537	511724	400693	392905	297429	270949	433441	387364	328459	258268	304319	431342	324504	441004	348633	311064	258490	311720	308649	299217	385729	322781	319538	251113	259980	269733	305534	322536	356296	265607	347080	362435	257049	240674	155088	278444	393198	314928
O94874	E3 UFM1-protein ligase 1 (EC 2.3.2.-) (E3 UFM1-protein transferase 1) (Novel LZAP-binding protein) (Regulator of C53/LZAP and DDRGK1)	UFL1	UFL1 KIAA0776 NLBP RCAD	794	7	160471	185270	218009	157619	167102	234634	191345	242315	131488	170356	170239	158146	164706	253699	203775	176761	162935	142875	165171	204527	200755	162077	137122	186616	152777	158996	240601	152510	173029	133257	161241	144214	193442	154201	197716	183979	128996	146740	194366	144822	66312.6	133335	159442	189033
O94875	Sorbin and SH3 domain-containing protein 2 (Arg-binding protein 2) (ArgBP2) (Arg/Abl-interacting protein 2) (Sorbin)	SORBS2	SORBS2 ARGBP2 KIAA0777	1100	5	1.13251e+06	883622	742046	666267	562132	697997	713921	981356	729376	845049	715750	768082	830633	1.13323e+06	887914	805911	977131	984555	587950	804237	675543	524264	454392	631272	661115	578105	860502	563133	643042	471205	1.07858e+06	898744	833234	575955	647908	656846	654628	849328	966934	622803	366771	692038	901889	1.0492e+06
O94886	CSC1-like protein 1 (Transmembrane protein 63A)	TMEM63A	TMEM63A KIAA0489 KIAA0792	807	2	90835.8	191884	196582	132251	112559	144209	142915	167676	129949	147914	147800	144598	161030	170217	203608	116884	163323	113558	132235	255724	146576	100624	104413	150218	125538	135251	223121	127288	136070	88481.5	84922.7	165148	184648	129363	156347	154638	116887	133929	122697	111099	63261.9	90832.9	176378	205839
O94887	FERM, ARHGEF and pleckstrin domain-containing protein 2 (FERM domain-including RhoGEF) (FIR) (FERM, RhoGEF and pleckstrin domain-containing protein 2) (Pleckstrin homology domain-containing family C member 3) (PH domain-containing family C member 3)	FARP2	FARP2 KIAA0793 PLEKHC3	1054	2	705647	482333	533991	572105	458275	769706	459208	533901	377286	544951	620179	465171	372918	790935	543602	516079	574534	522187	428862	473603	507150	481186	349329	549256	387049	469066	535389	418736	439900	375012	531880	350778	566029	445108	526534	498057	408562	483406	461755	477785	280750	382783	494349	717451
O94888	UBX domain-containing protein 7	UBXN7	UBXN7 KIAA0794 UBXD7	489	2	389057	333663	315479	672985	293999	420967	780137	492353	289422	315966	505168	610143	366984	862070	456751	549974	695671	582563	387782	535518	514202	468685	528999	482006	474380	369594	544157	455491	434263	412188	353842	368503	396115	535595	415856	446963	468538	584255	596344	344643	218618	323422	392661	704195
O94903	Pyridoxal phosphate homeostasis protein (PLP homeostasis protein) (Proline synthase co-transcribed bacterial homolog protein) (Pyridoxal phosphate-binding protein)	PLPBP	PLPBP PROSC	275	3	166382	138728	140294	218860	194820	179070	156570	164800	167934	173236	174175	149595	139763	220910	202513	166223	174308	152274	184446	168673	189398	170380	154198	177333	160977	190710	195672	109223	165158	148909	201963	141545	158352	175721	155939	168912	146301	145377	134325	122596	92715.6	138239	153455	187698
O94905	Erlin-2 (Endoplasmic reticulum lipid raft-associated protein 2) (Stomatin-prohibitin-flotillin-HflC/K domain-containing protein 2) (SPFH domain-containing protein 2)	ERLIN2	ERLIN2 C8orf2 SPFH2 UNQ2441/PRO5003/PRO9924	339	7	180836	121537	188722	259762	254857	422201	173390	204842	152330	206383	216993	198016	135896	317118	189686	173321	181465	99415.8	211545	153278	246863	240268	164479	213060	179983	224109	249100	192917	211273	176386	167693	108426	160716	261105	283967	263311	123238	127830	158993	162485	86884.2	137207	122577	221838
O94906	Pre-mRNA-processing factor 6 (Androgen receptor N-terminal domain-transactivating protein 1) (ANT-1) (PRP6 homolog) (U5 snRNP-associated 102 kDa protein) (U5-102 kDa protein)	PRPF6	PRPF6 C20orf14	941	2	119911	203410	232428	291659	215327	312410	208200	243254	162854	252304	264198	254115	181132	292104	238097	167099	220594	128828	225051	277715	297258	183003	202597	166325	169258	221617	242683	158692	187778	147632	103012	152985	210750	259383	248999	262356	155996	155159	230143	186788	120209	166707	168072	216580
O94915	Protein furry homolog-like (ALL1-fused gene from chromosome 4p12 protein)	FRYL	FRYL AF4P12 KIAA0826	3013	10	5669.43	5099.78	14996.8	3613.33	4676.54	9453.14	6616.33	14958.4	9064.38	6831.99	11369.6	10056	6079.63	10959.9	10177.3	11113	10583.1	8767.16	19119.7	22832.9	26901	14281.5	14792	15866.1	8290.09	18168.7	17315.5	16342.1	20443.5	11680.8	5189.38	5739.55	12648.3	6789.13	6869.8	10766.2	6899.91	4478.05	10038.4	7759.46	4004.58	5139.35	6610.3	9744.41
O94916	Nuclear factor of activated T-cells 5 (NF-AT5) (T-cell transcription factor NFAT5) (Tonicity-responsive enhancer-binding protein) (TonE-binding protein) (TonEBP)	NFAT5	NFAT5 KIAA0827 TONEBP	1531	2	1.28531e+06	952991	803431	633849	553205	814695	893748	1.02843e+06	840767	824073	908759	781784	748502	1.28163e+06	1.10047e+06	1.04135e+06	1.0719e+06	1.11453e+06	693598	899275	748852	607076	551955	713886	728978	709598	970315	670668	748214	556284	1.16897e+06	935017	887231	627895	662614	689955	658372	839499	920689	641228	389854	636626	796745	1.16441e+06
O94919	Endonuclease domain-containing 1 protein (EC 3.1.30.-)	ENDOD1	ENDOD1 KIAA0830	500	5	75198.5	78210.1	79732.7	93461.3	81420.6	106325	93617.3	100419	71274.4	95152.7	98148.9	73586.9	69152.1	130746	104314	84859.9	86611.3	72120.2	76133.2	84791.1	97540.2	77033	55075.7	78158.4	81684.3	88607.5	114287	68153.2	79486.1	55655	64856.1	74384.5	67213.6	89541.6	92248	80869.8	60730.9	74772.1	76953.9	72064.5	43145.1	65087.3	81463.7	94578.8
O94925	Glutaminase kidney isoform, mitochondrial (GLS) (EC 3.5.1.2) (K-glutaminase) (L-glutamine amidohydrolase)	GLS	GLS GLS1 KIAA0838	669	2	928293	1.61231e+06	1.90127e+06	1.85514e+06	1.50773e+06	1.91761e+06	2.14145e+06	2.45467e+06	1.74953e+06	1.87784e+06	1.87164e+06	1.86141e+06	2.5462e+06	1.99555e+06	2.15721e+06	1.09937e+06	1.41406e+06	1.9682e+06	1.27906e+06	1.97443e+06	1.40384e+06	1.35565e+06	1.06043e+06	1.50146e+06	1.61909e+06	1.34947e+06	2.26374e+06	1.37214e+06	1.6198e+06	1.18512e+06	846880	1.78519e+06	2.19599e+06	1.72166e+06	1.81035e+06	1.69768e+06	1.78569e+06	2.63904e+06	1.5409e+06	1.52157e+06	954822	1.49641e+06	3.0619e+06	1.64374e+06
O94964	Protein SOGA1 (SOGA family member 1) (Suppressor of glucose by autophagy) (Suppressor of glucose, autophagy-associated protein 1) [Cleaved into: N-terminal form; C-terminal 80 kDa form (80-kDa SOGA fragment)]	SOGA1	SOGA1 C20orf117 KIAA0889 SOGA	1423	2	224604	279281	387503	363809	228119	297554	303218	437551	214417	315180	390465	355680	417694	337378	449277	227016	322768	286930	294972	458597	331026	288039	242662	344075	302194	312447	376142	277626	305537	193715	205498	360042	425943	284031	299393	270899	261422	368453	339781	233151	123525	249383	474771	265365
O94966	Ubiquitin carboxyl-terminal hydrolase 19 (EC 3.4.19.12) (Deubiquitinating enzyme 19) (Ubiquitin thioesterase 19) (Ubiquitin-specific-processing protease 19) (Zinc finger MYND domain-containing protein 9)	USP19	USP19 KIAA0891 ZMYND9	1318	3	466258	1.02039e+06	892116	805366	640131	713538	907560	1.03922e+06	767917	851883	911530	1.03426e+06	1.20231e+06	545764	1.01605e+06	446365	471730	775434	567617	1.24048e+06	568010	486192	444995	737086	879500	649737	1.32582e+06	729535	850490	554855	590198	864669	864767	684094	678626	597630	703841	787298	688443	646900	412286	693297	1.08625e+06	587737
O94973	AP-2 complex subunit alpha-2 (100 kDa coated vesicle protein C) (Adaptor protein complex AP-2 subunit alpha-2) (Adaptor-related protein complex 2 subunit alpha-2) (Alpha-adaptin C) (Alpha2-adaptin) (Clathrin assembly protein complex 2 alpha-C large chain) (Huntingtin yeast partner J) (Huntingtin-interacting protein 9) (HIP-9) (Huntingtin-interacting protein J) (Plasma membrane adaptor HA2/AP2 ada…	AP2A2	AP2A2 ADTAB CLAPA2 HIP9 HYPJ KIAA0899	939	4	51153	28797.5	60350.1	63586.1	56305.7	109137	59887.1	76647.8	43030.4	38816	74469.1	65037.1	24582.6	97295.5	71312	61652.3	57093.2	34816.4	104716	67373.8	133005	99015.5	58735.8	89692	34550.1	78507.8	107819	63957.5	93441.3	50758.2	51281.2	33546.7	59637.8	58747.8	62174.4	69113.2	45138.9	32646.1	45805.6	48455.2	13586.1	38410.2	34550.3	68831.6
O94979	Protein transport protein Sec31A (ABP125) (ABP130) (SEC31-like protein 1) (SEC31-related protein A) (Web1-like protein)	SEC31A	SEC31A KIAA0905 SEC31L1 HSPC275 HSPC334	1220	8	54585	36581	82051.1	103322	84907.3	132882	83641.7	97906.8	58638.2	67370.6	85720.7	76120	40401.6	126656	73965.2	73960.2	78627	41242	144469	85269.6	145639	111985	99384.4	98520.7	83816.9	101745	127413	93920.2	96670.2	63332.9	47798.6	37657.9	73602.6	96407.8	90689	105526	56502.1	48164.8	63566.9	57122.1	28864.3	52862.7	40332.8	93097.2
O95049	Tight junction protein ZO-3 (Tight junction protein 3) (Zona occludens protein 3) (Zonula occludens protein 3)	TJP3	TJP3 ZO3	919	3	492639	456302	566109	549169	420360	592270	502341	621908	437334	596488	560547	423215	504201	737897	615534	490133	495039	426237	506429	531769	551657	503720	375448	493156	457113	469000	589426	409490	511363	351322	463439	436100	564918	484293	578506	552955	406889	529441	470516	417787	264379	398407	396690	623601
O95071	E3 ubiquitin-protein ligase UBR5 (EC 2.3.2.26) (E3 ubiquitin-protein ligase, HECT domain-containing 1) (HECT-type E3 ubiquitin transferase UBR5) (Hyperplastic discs protein homolog) (hHYD) (Progestin-induced protein)	UBR5	UBR5 EDD EDD1 HYD KIAA0896	2799	3	169031	143756	180045	275115	144648	213205	277818	236397	204547	133448	189731	223154	161353	265670	196117	223554	225794	178501	260331	259906	221241	160783	228903	205436	204728	186348	187447	163806	164636	182008	168251	149558	193695	248750	194693	179844	231304	204672	201989	118266	88791.7	175534	172344	226174
O95104	Splicing factor, arginine/serine-rich 15 (CTD-binding SR-like protein RA4) (SR-related and CTD-associated factor 4)	SCAF4	SCAF4 KIAA1172 SFRS15	1147	2	497021	361780	420031	672817	441865	532131	600902	649690	520727	443652	467130	554725	391567	725177	638111	562865	536421	414872	700146	630090	610449	497162	599682	549490	479200	510875	610070	424564	458032	514378	468388	347217	544733	662920	534416	500095	517455	573199	580907	402665	278357	483104	449920	589775
O95140	Mitofusin-2 (EC 3.6.5.-) (Transmembrane GTPase MFN2)	MFN2	MFN2 CPRP1 KIAA0214	757	2	391361	419377	348921	398331	342151	367039	265846	236242	220515	341265	240750	220432	61824	364896	318973	343910	339499	310949	185565	266146	243826	230049	237642	267120	195303	160189	323676	161154	220049	258534	454328	442136	88431.4	281534	395121	355985	295986	351138	429068	304410	219663	320833	352980	298527
O95155	Ubiquitin conjugation factor E4 B (EC 2.3.2.27) (Homozygously deleted in neuroblastoma 1) (RING-type E3 ubiquitin transferase E4 B) (Ubiquitin fusion degradation protein 2)	UBE4B	UBE4B HDNB1 KIAA0684 UFD2	1302	4	273329	485566	445529	367861	317112	375225	445739	551837	384462	407799	416114	406388	555143	397539	477646	267336	360176	419732	318925	559192	347389	285975	268610	348405	366203	334290	497054	327013	366474	255090	271765	493565	467131	322990	430471	346691	333984	421314	402693	296679	187503	291149	558073	367930
O95163	Elongator complex protein 1 (ELP1) (IkappaB kinase complex-associated protein) (IKK complex-associated protein) (p150)	ELP1	ELP1 IKAP IKBKAP	1332	2	95203.5	103099	153087	180307	130473	114928	205705	211261	140828	171171	126861	175241	220367	149901	162491	121738	103596	92373.3	97986.2	132643	115498	141520	74342.2	75984.3	96577	130678	136099	119794	77391.5	91722.4	75514.2	62849.9	110451	157420	97113.8	167452	96026.6	214971	144564	124058	79834	124378	217837	133520
O95168	NADH dehydrogenase [ubiquinone] 1 beta subcomplex subunit 4 (Complex I-B15) (CI-B15) (NADH-ubiquinone oxidoreductase B15 subunit)	NDUFB4	NDUFB4	129	2	77476.5	40456.4	65002.8	101761	65217.4	124717	76753.8	76245.4	94963	88135.7	90799.9	78104.1	41827.7	123401	90954.2	59166.2	68675	46910.5	115776	100012	107168	94591.2	89277	94582.8	72501.3	93461.3	107214	80431.9	88803.6	63959.7	73776.3	45973.7	65684.9	97957.3	93302.5	113237	47583.3	51969.8	77681.2	69097.2	38291.4	55176.7	50954.6	90427.3
O95169	NADH dehydrogenase [ubiquinone] 1 beta subcomplex subunit 8, mitochondrial (Complex I-ASHI) (CI-ASHI) (NADH-ubiquinone oxidoreductase ASHI subunit)	NDUFB8	NDUFB8	186	2	28950.9	34673.2	30431.6	33829.6	54059.5	48412.4	31186.4	40799.2	32620.4	44254.3	33901.1	40383.3	44292	45128.7	43090.9	39572	40701.2	35005.4	36015.9	35998.2	71256.4	45831.8	38085.2	47714.5	36744.3	32963.4	39750.8	41899	41814.5	28252.9	32707.6	25051.6	41995	47237.5	48935.6	51596.7	26403.3	39681.2	44091.9	29705.4	16559.7	37609.6	50568.4	49878.7
O95202	Mitochondrial proton/calcium exchanger protein (Leucine zipper-EF-hand-containing transmembrane protein 1)	LETM1	LETM1	739	2	669272	721884	775654	1.16741e+06	695112	963042	1.06496e+06	1.01616e+06	798796	597941	809820	991411	615123	1.08755e+06	1.08151e+06	839084	843310	703927	1.03802e+06	1.07292e+06	956262	763427	1.05055e+06	840665	809130	843359	1.09126e+06	747791	756543	933796	573709	605555	779147	1.07004e+06	781722	827613	954025	803102	752454	458618	408900	798797	686491	946693
O95299	NADH dehydrogenase [ubiquinone] 1 alpha subcomplex subunit 10, mitochondrial (Complex I-42kD) (CI-42kD) (NADH-ubiquinone oxidoreductase 42 kDa subunit)	NDUFA10	NDUFA10	355	5	334254	265321	337064	345525	220308	273783	448349	388459	314467	188649	406740	344371	271319	541977	441554	381087	233839	221810	611816	414130	524381	456474	477334	443359	218315	276532	513764	413995	376368	370051	202310	155171	212345	338144	437292	230416	213965	221089	238981	167273	183723	205079	235511	279753
O95336	6-phosphogluconolactonase (6PGL) (EC 3.1.1.31)	PGLS	PGLS	258	11	207289	186839	283931	286997	255468	346355	221602	259728	194481	295480	316233	234787	176567	399080	255962	229738	225620	153990	349501	253929	385982	351158	260623	315867	290380	340937	361160	260560	295169	222680	202328	153471	282145	280853	290058	297029	170946	196553	204474	223283	123657	164089	168367	292826
O95340	Bifunctional 3'-phosphoadenosine 5'-phosphosulfate synthase 2 (PAPS synthase 2) (PAPSS 2) (Sulfurylase kinase 2) (SK 2) (SK2) [Includes: Sulfate adenylyltransferase (EC 2.7.7.4) (ATP-sulfurylase) (Sulfate adenylate transferase) (SAT); Adenylyl-sulfate kinase (EC 2.7.1.25) (3'-phosphoadenosine-5'-phosphosulfate synthase) (APS kinase) (Adenosine-5'-phosphosulfate 3'-phosphotransferase) (Adenylylsul…	PAPSS2	PAPSS2 ATPSK2	614	4	6533.75	4621.41	10353.4	4375.37	4810.39	8567.61	4970.82	9046.87	5150.56	6043.19	8578.86	9458.16	4800.8	9458.57	6611.16	6467.45	5007.35	6454.62	20358.5	14148.5	15104	14293.2	10127.6	11736.5	7203.65	9359.64	16245.2	12586.4	12331.1	8407.83	3429.97	4237.96	9698.65	5197.7	5601.4	5810.9	6451.52	4788.42	7249.64	6370.38	3101.69	6566.21	5154.87	7375.4
O95352	Ubiquitin-like modifier-activating enzyme ATG7 (ATG12-activating enzyme E1 ATG7) (Autophagy-related protein 7) (APG7-like) (hAGP7) (Ubiquitin-activating enzyme E1-like protein)	ATG7	ATG7 APG7L	703	2	280987	144758	228715	284419	237841	338885	212971	247951	189959	297531	259998	256633	149082	344160	303491	245228	229572	134276	325693	202163	396240	336984	279645	307978	256468	347037	305526	247339	286107	286522	261227	155627	277620	315125	285166	301473	204443	221706	253275	224563	152069	214971	165742	288020
O95372	Acyl-protein thioesterase 2 (APT-2) (EC 3.1.2.-) (Lysophospholipase II) (LPL-II) (LysoPLA II)	LYPLA2	LYPLA2 APT2	231	2	21372.3	17028.8	48955.1	20844.1	22722.3	44158.4	34495.2	37438.3	24912	31676.4	50034.7	16714.7	11499.5	31918.9	27024.4	25773	20482.7	17059.7	112869	54474.1	137917	77341.2	63114.9	73994	46752.1	46069.2	100283	61147.5	75896.1	41444.4	17048	13852.9	41096.6	36578.8	18830	39908.2	14617.6	11664.1	29318.5	32434	7441.61	24104.6	16048.4	26336.8
O95373	Importin-7 (Imp7) (Ran-binding protein 7) (RanBP7)	IPO7	IPO7 RANBP7	1038	6	28704.3	33266.3	43096.4	47374.8	45139.8	55985.5	38115.2	53839.8	37492.8	39851.1	40915.8	38448.3	29080.6	61743.4	52533.8	37530.1	43692.5	37653.7	61338.6	42947.5	68664.2	50332.8	42147.3	47890	38612.6	47193	57374.3	43997.7	55210.8	33487.8	40322.7	29292	44269.9	45112.6	48610.4	50027.1	36510.9	45139.4	42765.8	29842.2	18304.1	33376.8	33128.7	50384.1
O95394	Phosphoacetylglucosamine mutase (PAGM) (EC 5.4.2.3) (Acetylglucosamine phosphomutase) (N-acetylglucosamine-phosphate mutase) (Phosphoglucomutase-3) (PGM 3)	PGM3	PGM3 AGM1	542	9	98292.8	73092	148665	160578	139203	207266	125348	151228	93673.6	137768	153808	134269	92117.4	188042	124011	93976.6	120758	74550.8	194606	126347	197457	180168	131792	149834	137308	170852	182757	130690	153965	121466	89939.9	76993.5	129779	162727	137468	146106	116741	98227.1	96415.5	120839	65117.7	99073.4	81512.1	130034
O95396	Adenylyltransferase and sulfurtransferase MOCS3 (Molybdenum cofactor synthesis protein 3) (Molybdopterin synthase sulfurylase) (MPT synthase sulfurylase) [Includes: Molybdopterin-synthase adenylyltransferase (EC 2.7.7.80) (Adenylyltransferase MOCS3) (Sulfur carrier protein MOCS2A adenylyltransferase); Molybdopterin-synthase sulfurtransferase (EC 2.8.1.11) (Sulfur carrier protein MOCS2A sulfurtran…	MOCS3	MOCS3 UBA4	460	2	754360	564791	478820	342464	311497	442106	503813	615322	457443	485588	472986	472912	478923	821410	671767	586693	633331	637705	375268	542830	367393	305916	283870	385708	426855	378270	580227	366334	364442	304209	709919	590948	579520	345315	403938	392429	422062	585630	576020	420453	235167	403951	505154	730921
O95400	CD2 antigen cytoplasmic tail-binding protein 2 (CD2 cytoplasmic domain-binding protein 2) (CD2 tail-binding protein 2) (U5 snRNP 52K protein) (U5-52K)	CD2BP2	CD2BP2 KIAA1178	341	3	270903	301907	244412	400209	352088	544207	209713	396238	236742	324777	293601	315101	217533	392927	357057	306754	333673	291494	316331	332693	367767	366998	308406	329594	280002	374356	361488	212849	338856	303566	266463	272375	284777	386796	361318	327933	215673	326285	321871	261305	161615	255678	339972	270434
O95425	Supervillin (Archvillin) (p205/p250)	SVIL	SVIL	2214	3	478971	509089	491845	331215	368164	481081	477243	589518	470668	522648	548838	470524	430225	705575	601454	516928	589380	607932	424141	502059	450855	347159	311597	413823	455097	411084	590014	363648	356518	245752	633760	504414	540009	365963	466092	498885	404801	540489	584123	370804	252241	388291	487485	645646
O95433	Activator of 90 kDa heat shock protein ATPase homolog 1 (AHA1) (p38)	AHSA1	AHSA1 C14orf3 HSPC322	338	4	68109.4	68566.4	109688	130630	92358.5	173283	137844	143785	98238.3	88447.3	137069	138511	63851.1	164773	135161	116722	127056	91652.8	242106	183014	217919	148926	186319	165477	134475	154487	209532	138224	143018	135232	64270.7	76984.8	91614.3	87786.3	106298	121041	108948	62178.8	99091.9	69523	33563.5	82225	54022.3	121843
O95453	Poly(A)-specific ribonuclease PARN (EC 3.1.13.4) (Deadenylating nuclease) (Deadenylation nuclease) (Polyadenylate-specific ribonuclease)	PARN	PARN DAN	639	2	293741	140762	342337	332270	385251	512555	213377	227714	210135	520776	510314	390837	101696	580314	281348	297508	258547	478336	364622	239379	398964	447486	329778	416929	358627	322817	467032	321151	391255	434783	249300	101115	268516	174891	294092	293741	177724	169865	176372	358028	278127	252723	118292	280806
O95466	Formin-like protein 1 (CLL-associated antigen KW-13) (Leukocyte formin)	FMNL1	FMNL1 C17orf1 C17orf1B FMNL FRL1	1100	2	453194	892631	929575	709957	467870	919991	884774	922309	673717	682766	760065	712202	1.02093e+06	687625	864544	355766	485479	632145	610866	1.16515e+06	826409	726996	519143	650955	676008	577110	1.19269e+06	740881	729397	485609	388712	793803	919760	545630	701563	689910	676812	634183	711500	477362	301045	525272	1.00301e+06	543630
O95479	GDH/6PGL endoplasmic bifunctional protein [Includes: Glucose 1-dehydrogenase (EC 1.1.1.47) (Glucose-6-phosphate dehydrogenase) (EC 1.1.1.363); 6-phosphogluconolactonase (6PGL) (EC 3.1.1.31)]	H6PD	H6PD GDH	791	2	110976	111573	131794	159907	104348	147637	159179	154471	104040	217919	156839	135200	98650.9	190522	156473	135005	118933	103289	157287	133682	166703	127930	132469	146179	119768	146608	170229	120624	126193	122308	108071	101120	122427	149615	113369	120340	126857	112273	161040	103857	81757.9	111610	121931	156454
O95486	Protein transport protein Sec24A (SEC24-related protein A)	SEC24A	SEC24A	1093	2	42963	32234.8	103274	31506.1	37837	89968.6	63407.2	70697.3	66986	69498.5	85657.8	98872.2	13807.5	83752.3	48140.3	23881.6	34044.8	21641	120609	38428.7	175909	112311	84481.3	77959	70075.6	77340.4	99139.7	75862	72497.1	48276.7	22052.8	31009.6	93125.8	59835	64925.8	65193.9	15746.6	15566.6	25484.8	64426	8051.29	50338.3	20531.3	77543.8
O95487	Protein transport protein Sec24B (SEC24-related protein B)	SEC24B	SEC24B	1268	2	47890.2	24436	64683.4	76753.6	34633.2	56047.9	41545.4	76607.5	39145.4	38647.3	42289.2	63402.2	40466.6	91891.2	58374.3	57482.3	54270.6	43473.8	56346	63441.9	140497	54272.7	77974.7	73517.9	43431.5	51321.4	83864	56282.3	64397.4	60421.7	26226.1	23360.8	54689	68247.1	51455.2	71049.9	48998.6	42537.7	53839.6	34069.2	18694.9	46675.5	47937.9	44199.6
O95571	Persulfide dioxygenase ETHE1, mitochondrial (EC 1.13.11.18) (Ethylmalonic encephalopathy protein 1) (Hepatoma subtracted clone one protein) (Sulfur dioxygenase ETHE1)	ETHE1	ETHE1 HSCO	254	3	82400.6	79896.7	118605	132161	107996	158515	112710	153142	101505	117719	131579	90404.7	64534.6	165809	116562	122405	101776	94494.4	131970	109879	137603	114222	90430.3	128985	117440	144847	119551	108474	111285	106399	82317.2	94071.2	105462	116939	139279	137842	74537	79796.5	105374	102795	57166.1	70562.4	97217	133105
O95573	Long-chain-fatty-acid--CoA ligase 3 (EC 6.2.1.3) (Long-chain acyl-CoA synthetase 3) (LACS 3)	ACSL3	ACSL3 ACS3 FACL3 LACS3	720	7	433275	891656	810278	634003	553577	680118	775939	885893	646828	739196	769178	723942	845798	533632	771513	366769	488850	648210	548730	1.04634e+06	507671	442085	458560	664234	674964	579048	972542	612838	697632	471161	373532	808171	747397	589563	630911	549457	622807	713463	663335	576980	356556	575943	904619	443375
O95602	DNA-directed RNA polymerase I subunit RPA1 (RNA polymerase I subunit A1) (EC 2.7.7.6) (A190) (DNA-directed RNA polymerase I largest subunit) (DNA-directed RNA polymerase I subunit A) (RNA polymerase I 194 kDa subunit) (RPA194)	POLR1A	POLR1A	1720	2	254963	186174	207774	284235	235412	218518	272222	218952	193333	209320	241837	285068	190357	342850	278638	232550	272750	218219	224983	261785	254680	327581	173530	210734	183231	205754	240988	186076	254464	216888	249558	236633	252177	228001	297679	291801	180645	216999	216902	240047	116157	139652	148924	224910
O95613	Pericentrin (Kendrin) (Pericentrin-B)	PCNT	PCNT KIAA0402 PCNT2	3336	2	125407	94572	185417	99575.4	104395	205257	86079.4	75988	73476.8	114265	107673	102845	83269.2	135209	149366	67895.8	89184.2	57591.7	112594	97098.1	132295	105799	80384.5	107457	85845.7	108375	100758	84333.2	99188.3	89380.1	102059	99475.6	88596.8	104352	132735	97943.3	70161.6	95794.8	99094.6	95680.2	51833.7	83058.9	64852.1	98094.4
O95630	STAM-binding protein (EC 3.4.19.-) (Associated molecule with the SH3 domain of STAM) (Endosome-associated ubiquitin isopeptidase)	STAMBP	STAMBP AMSH	424	2	101550	265040	169225	72597.7	103540	87719.5	176826	182366	162137	151162	141891	123428	134044	114959	179991	122928	115949	152495	159297	150106	101527	104063	92500.3	137133	117518	167485	153235	114871	95309	82532.1	117025	154740	224033	103037	141559	140657	121030	203449	242858	112864	98277.2	162661	192487	162373
O95639	Cleavage and polyadenylation specificity factor subunit 4 (Cleavage and polyadenylation specificity factor 30 kDa subunit) (CPSF 30 kDa subunit) (NS1 effector domain-binding protein 1) (Neb-1) (No arches homolog)	CPSF4	CPSF4 CPSF30 NAR NEB1	269	2	394184	380139	397209	646957	459177	531928	539398	599663	414626	495056	479748	438497	400882	686371	573555	509040	491812	401468	620359	455575	548559	590445	542784	583163	456959	520479	522142	468880	441701	474548	427711	436124	563409	831912	656572	543385	527906	501937	610062	376296	291907	428241	464092	1.06806e+06
O95671	N-acetylserotonin O-methyltransferase-like protein (ASMTL) (EC 2.1.1.-)	ASMTL	ASMTL	621	2	149699	274769	261266	173601	136607	204151	242849	229958	216364	197705	214972	180630	271144	154853	213178	128508	150592	196522	163758	317263	162141	136011	130237	206545	197417	156589	328183	157763	206003	149656	154178	268452	297614	155488	182567	168289	215079	279897	260904	169407	115192	196094	338877	145872
O95677	Eyes absent homolog 4 (EC 3.1.3.48)	EYA4	EYA4	639	2	83796.2	83953.7	101297	114658	87391.4	169887	116951	115142	93516.5	104507	118194	107715	82448.8	158683	193954	100350	94449.7	107057	144689	106342	167407	141704	103058	120342	110211	121040	171842	123039	126809	78090.2	70928.2	81729.8	110083	112793	102053	84658.2	81439.6	62151	90216.2	85219.8	31397.5	68546.3	89070.6	106153
O95678	Keratin, type II cytoskeletal 75 (Cytokeratin-75) (CK-75) (Keratin-6 hair follicle) (hK6hf) (Keratin-75) (K75) (Type II keratin-K6hf) (Type-II keratin Kb18)	KRT75	KRT75 K6HF KB18	551	2	664127	437011	450754	406777	379169	484451	527434	567314	460731	508620	544489	550259	455086	681340	585974	520135	519305	491693	379149	499181	446922	352731	336066	373600	440262	422711	545955	381703	281396	323927	569106	513865	515953	407158	455963	434721	417185	533449	523397	401456	234515	433759	494370	579112
O95716	Ras-related protein Rab-3D	RAB3D	RAB3D GOV RAB16	219	3	83235.7	64699.8	67793.2	78530.5	93134.6	141423	64005.6	97093.4	65821.4	80985.5	109935	64242.5	60850.3	135888	115618	85618.9	81437.9	45358.8	160711	93385.7	193497	133081	110724	96868.8	86935.3	119528	125518	82179.4	98882	73878.6	66299.9	47311.1	64971.3	77200.1	82941.9	88227.8	41781.8	46174.7	107086	59233.6	31378.8	64634.8	70901.3	88345.3
O95721	Synaptosomal-associated protein 29 (SNAP-29) (Soluble 29 kDa NSF attachment protein) (Vesicle-membrane fusion protein SNAP-29)	SNAP29	SNAP29	258	2	72350.3	42372	46125.7	76482.6	80866.8	106477	51577.7	59241.9	73008.1	67694.7	69518.4	66431.2	51812.8	56817.1	67235.2	56100.2	54706.5	41263.6	49898.4	42329.9	66274.4	52939	53405.8	72480.6	45729.5	67314.6	61971.5	53058.7	66079.2	57773	46325.1	74099.4	91255.8	68699.2	79749.6	63388.3	57413.9	66022.8	86655.1	48590.9	31142	56576.8	77364.5	84518.4
O95747	Serine/threonine-protein kinase OSR1 (EC 2.7.11.1) (Oxidative stress-responsive 1 protein)	OXSR1	OXSR1 KIAA1101 OSR1	527	3	17113.1	13536.8	37577	25569	18120.7	33850.2	17655.9	27327.1	15646.2	21051.2	18411.8	19927.3	16614	33339.1	25057.9	26359.2	23323.7	16989.9	78244.7	30606.4	32834.4	45586.1	24271.8	30220.9	16449.4	23680.2	84881.1	29314.5	24625.3	19844.1	21134.3	12193	28519.4	19412.7	22417.8	21047.6	17701.7	9446	12245.6	16182.1	8153.02	20023.6	15005.8	31061.6
O95757	Heat shock 70 kDa protein 4L (Heat shock 70-related protein APG-1) (Osmotic stress protein 94)	HSPA4L	HSPA4L APG1 OSP94	839	5	158296	303135	238741	223698	172036	238651	249137	328567	211499	274979	247246	244293	306854	265718	273585	162020	174974	229995	200184	301849	237128	143030	150369	211626	211795	198020	312889	182752	244432	177508	152989	272254	180434	204898	191809	196249	211715	261311	238450	212618	117404	174557	243922	205176
O95758	Polypyrimidine tract-binding protein 3 (Regulator of differentiation 1) (Rod1)	PTBP3	PTBP3 ROD1	552	2	447801	294568	341638	292234	220840	324052	402745	604007	387738	373789	477427	361516	309215	657393	464498	430571	642065	488987	326816	446232	328196	302163	260639	362243	313764	310894	451795	300821	302764	279098	371305	440280	327129	242111	276419	292037	326683	419163	451086	311732	173169	240468	364862	496047
O95782	AP-2 complex subunit alpha-1 (100 kDa coated vesicle protein A) (Adaptor protein complex AP-2 subunit alpha-1) (Adaptor-related protein complex 2 subunit alpha-1) (Alpha-adaptin A) (Alpha1-adaptin) (Clathrin assembly protein complex 2 alpha-A large chain) (Plasma membrane adaptor HA2/AP2 adaptin alpha A subunit)	AP2A1	AP2A1 ADTAA CLAPA1	977	5	297383	475858	488312	328612	276755	396529	464062	666409	422838	429654	481405	446412	569393	390371	545842	260420	349415	449837	328626	640208	331034	287140	200525	396845	422894	360291	602914	408847	451829	290698	261201	536273	463780	369672	401244	286568	364485	482509	413418	331963	268176	335543	695269	335785
O95786	Probable ATP-dependent RNA helicase DDX58 (EC 3.6.4.13) (DEAD box protein 58) (RIG-I-like receptor 1) (RLR-1) (Retinoic acid-inducible gene 1 protein) (RIG-1) (Retinoic acid-inducible gene I protein) (RIG-I)	DDX58	DDX58	925	2	231852	218200	211081	240909	187791	221399	265153	242097	231451	266915	233882	218561	207973	317928	302327	203783	246784	243932	247033	212650	213859	194267	197676	200804	177327	190568	266389	164808	206877	159248	213239	193096	234941	229018	228284	204158	187849	182331	245683	187039	98076.1	196833	242332	259639
O95793	Double-stranded RNA-binding protein Staufen homolog 1	STAU1	STAU1 STAU	577	3	468736	486709	420200	424977	342057	435968	420196	533652	425194	450756	435039	408603	397265	523973	621795	333107	399675	490980	352287	425367	375220	343945	294561	288061	375147	390280	509466	338872	384987	298989	349970	369223	545400	388757	431508	459129	393542	421649	504700	340087	236674	346513	464961	440591
O95810	Caveolae-associated protein 2 (Cavin-2) (PS-p68) (Phosphatidylserine-binding protein) (Serum deprivation-response protein)	CAVIN2	CAVIN2 SDPR	425	4	277268	356634	315597	310269	248290	358792	338298	336908	275341	389993	334434	286618	326179	381573	352229	335276	248736	269289	262864	305186	327595	289434	243032	283537	290810	266623	393041	258443	252849	222214	282673	346104	338662	236201	238267	308311	270692	313105	320667	239202	178977	223378	344455	314313
O95816	BAG family molecular chaperone regulator 2 (BAG-2) (Bcl-2-associated athanogene 2)	BAG2	BAG2	211	3	123751	165775	188807	145537	115681	161219	163850	165592	131799	168189	170511	136401	143739	169904	158958	146576	131674	149566	131960	153758	150317	134524	99326.2	149373	126904	117636	174868	125032	141597	104548	111800	173172	162854	137662	119905	121948	133286	131727	140388	134094	81437.9	114560	163844	139698
O95817	BAG family molecular chaperone regulator 3 (BAG-3) (Bcl-2-associated athanogene 3) (Bcl-2-binding protein Bis) (Docking protein CAIR-1)	BAG3	BAG3 BIS	575	3	408190	724769	687240	557676	452433	592785	733765	877694	594727	699185	743523	690700	775786	577587	760820	417162	471567	593185	557967	825193	590263	459339	438265	593687	629461	524879	889881	538975	690766	408435	371920	690575	662155	479137	595773	473051	554708	611460	604555	487225	257763	524929	721664	403850
O95819	Mitogen-activated protein kinase kinase kinase kinase 4 (EC 2.7.11.1) (HPK/GCK-like kinase HGK) (MAPK/ERK kinase kinase kinase 4) (MEK kinase kinase 4) (MEKKK 4) (Nck-interacting kinase)	MAP4K4	MAP4K4 HGK KIAA0687 NIK	1239	2	141685	87621.5	108979	83872.1	110814	106683	107839	132356	76351.6	155245	202418	130050	121802	159946	133992	110540	119212	117817	86838.4	107665	117229	124878	81625.3	83478.5	107854	88630.4	105249	94556.8	104716	78779	144501	114532	120632	95792.3	114906	104038	117486	111890	159420	115441	65154.6	122072	140610	133226
O95822	Malonyl-CoA decarboxylase, mitochondrial (MCD) (EC 4.1.1.9)	MLYCD	MLYCD	493	2	174225	256768	142762	207186	124253	159061	124132	144397	122267	261742	132543	135492	137476	233428	147511	123558	146240	114591	141144	210087	206903	113598	83499.5	160930	137134	150108	136688	162598	136053	121031	151791	64595.8	159659	162023	207757	174685	92330.1	292615	301318	137167	128010	148374	247876	193218
O95825	Quinone oxidoreductase-like protein 1 (EC 1.-.-.-) (Protein 4P11) (Quinone oxidoreductase homolog 1) (QOH-1) (Zeta-crystallin homolog)	CRYZL1	CRYZL1 4P11	349	2	141923	182087	133849	104037	86378	109949	141559	210786	125221	149404	145376	163185	160014	199409	208325	145251	131015	170252	109903	197933	95480.3	78952.8	69426.5	119678	124283	129041	178787	123577	142932	88721.3	138338	198974	171220	82552.6	112897	98254.4	137598	203387	202248	116348	74111.9	131762	230144	148963
O95831	Apoptosis-inducing factor 1, mitochondrial (EC 1.1.1.-) (Programmed cell death protein 8)	AIFM1	AIFM1 AIF PDCD8	613	11	87364.4	84858.7	111157	136811	109016	158127	112843	143467	82375.3	105715	114775	110783	77607.4	157673	142749	98158.7	102432	82569.3	164564	117771	184407	147111	119196	138225	110633	141098	164891	127339	132958	107300	89124	73065	110811	132330	129656	134594	92254.6	97027.6	94987.8	89981.5	41729.1	82494.1	92658	111670
O95833	Chloride intracellular channel protein 3	CLIC3	CLIC3	236	2	279218	297077	390788	442537	366144	353797	501296	440497	345679	415135	386446	378389	401689	653096	399247	355837	383475	310237	395638	412963	422176	383467	361645	366820	328619	353690	670101	323373	374362	376185	399208	289611	432860	406613	375268	391685	437432	435324	439014	288902	213345	342509	328795	460694
O95834	Echinoderm microtubule-associated protein-like 2 (EMAP-2) (HuEMAP-2)	EML2	EML2 EMAP2 EMAPL2	649	6	247336	193897	246607	292980	274822	385302	271151	298310	230512	230172	277936	309811	210007	364080	271444	254757	229048	206850	316681	212877	315030	317472	209187	243537	272817	257231	293663	236908	253009	200197	236176	193615	255639	286235	317785	283594	182638	205991	250435	208365	128089	225075	187188	272135
O95861	3'(2'),5'-bisphosphate nucleotidase 1 (EC 3.1.3.7) (Bisphosphate 3'-nucleotidase 1) (PAP-inositol 1,4-phosphatase) (PIP)	BPNT1	BPNT1	308	3	100804	200200	218287	147824	106046	115048	184647	190853	161200	162971	165815	152441	212634	81957.8	168119	52720.9	122665	138912	121927	335521	120949	110881	113477	164347	192609	129935	277567	146311	175049	116528	33073.7	279269	183165	148937	112621	121452	163360	161497	144373	161160	68960.5	125239	230546	79854.2
O95865	N(G),N(G)-dimethylarginine dimethylaminohydrolase 2 (DDAH-2) (Dimethylarginine dimethylaminohydrolase 2) (EC 3.5.3.18) (DDAHII) (Dimethylargininase-2) (Protein G6a) (S-phase protein)	DDAH2	DDAH2 DDAH G6A NG30	285	8	177909	174170	240844	212988	193640	257779	213137	199738	143748	215929	241905	184873	136912	275587	220496	192048	198562	155796	231876	204474	243723	212220	192279	235035	203079	217527	242954	176748	239323	184338	164396	176444	235839	201637	209559	217106	143156	142399	147047	172757	101040	134870	169266	225998
O95866	Megakaryocyte and platelet inhibitory receptor G6b (Protein G6b)	MPIG6B	MPIG6B C6orf25 G6B G6B-B	241	2	409983	724343	713787	374475	814637	597121	729857	1.34071e+06	372419	444618	422102	461485	453134	1.07766e+06	454581	657520	384975	184383	878299	721593	302254	299784	679161	403864	427204	336967	617990	346185	305235	274848	870872	666780	802718	412750	579730	288116	605204	592195	642275	402867	355036	451906	295859	1.15258e+06
O95870	Protein ABHD16A (EC 3.-.-.-) (Alpha/beta hydrolase domain-containing protein 16A) (Abhydrolase domain-containing protein 16A) (HLA-B-associated transcript 5) (Protein G5)	ABHD16A	ABHD16A BAT5 G5 NG26 PP199	558	2	537995	326523	477999	387557	362988	408398	398099	410397	300511	516297	542029	363008	365823	608697	514317	413898	423355	263527	507079	391262	547929	494707	383859	403340	383006	401084	992687	475662	510623	453762	462135	367676	548598	383292	496707	417473	370855	461304	460012	327703	200129	328830	487080	493496
O95881	Thioredoxin domain-containing protein 12 (EC 1.8.4.2) (Endoplasmic reticulum resident protein 18) (ER protein 18) (ERp18) (Endoplasmic reticulum resident protein 19) (ER protein 19) (ERp19) (Thioredoxin-like protein p19) (hTLP19)	TXNDC12	TXNDC12 TLP19 UNQ713/PRO1376	172	3	65800.5	50193.5	70115.4	67574.7	72050	98914.1	54323.5	62402.5	49597.8	69142.8	63603.1	57120	47519.1	85191.5	67800.9	54857.1	58965.2	44885	69811.4	53181.6	69257.4	71747	66553.9	76439	55199.4	70331.1	77696.1	53715.3	58514.7	55693.9	53565.8	47895.5	63097.2	57358.9	80728.4	80535.5	51153.8	52337	55514.7	55989.5	33721.9	51257.7	53879.3	63070.1
O95886	Disks large-associated protein 3 (DAP-3) (PSD-95/SAP90-binding protein 3) (SAP90/PSD-95-associated protein 3) (SAPAP3)	DLGAP3	DLGAP3 DAP3	979	2	69580.5	219448	162654	103594	85665.2	99754.9	152633	208933	139631	143002	141959	147285	221291	109899	177619	73565.1	91705.1	147561	87824.6	209268	92033.6	77882.6	66758.3	102992	142713	112306	198437	107907	118450	83157.6	92732	172640	165489	87165.5	117092	99165.6	116286	171095	143290	99877.4	66976.4	105403	190163	93939.9
O95967	EGF-containing fibulin-like extracellular matrix protein 2 (Fibulin-4) (FIBL-4) (Protein UPH1)	EFEMP2	EFEMP2 FBLN4 UNQ200/PRO226	443	2	130128	155237	179779	159071	113793	137664	112195	168849	104824	159640	111017	126225	100912	266041	194370	143039	190831	161743	131680	158937	152116	147912	146771	189947	150938	108789	223125	139274	173184	111199	134974	162185	209901	154280	131422	143421	132339	163123	156044	121078	85455.4	140164	153141	156709
O95983	Methyl-CpG-binding domain protein 3 (Methyl-CpG-binding protein MBD3)	MBD3	MBD3	291	2	320881	455527	369993	374866	211464	282827	469152	676267	475244	593716	642815	608619	461551	399385	730633	351402	331407	544944	408696	458098	458350	262376	197762	298517	405838	383076	546773	356526	398661	245502	291619	411097	350597	274407	279119	226479	341996	535786	406156	374390	277455	391398	444352	327392
O95994	Anterior gradient protein 2 homolog (AG-2) (hAG-2) (HPC8) (Secreted cement gland protein XAG-2 homolog)	AGR2	AGR2 AG2 UNQ515/PRO1030	175	3	156181	149182	134486	224432	186188	305490	216420	278399	235257	391712	440099	359132	230042	303717	309244	227689	150031	168322	112875	214302	143686	133260	86499.5	138667	168707	150979	221025	155368	167556	109254	165090	132768	145794	224560	196338	203595	175388	257345	181648	288300	199465	226332	198475	213484
O96000	NADH dehydrogenase [ubiquinone] 1 beta subcomplex subunit 10 (Complex I-PDSW) (CI-PDSW) (NADH-ubiquinone oxidoreductase PDSW subunit)	NDUFB10	NDUFB10	172	5	238917	242566	308353	285493	250923	350829	277872	321914	238132	317165	294224	261783	300729	375238	310682	221033	243547	233204	296226	265568	339346	273597	231000	299635	256365	271812	357903	255103	289743	231367	198634	209931	267636	280293	290624	255624	205725	279015	257579	232759	132327	254642	311417	292851
O96005	Cleft lip and palate transmembrane protein 1	CLPTM1	CLPTM1	669	2	193933	208427	235767	423169	202627	336207	424604	446135	282006	192587	267395	365059	247389	403716	354069	266030	316650	228216	440517	483797	395613	267857	353017	379979	280669	299892	377416	290699	307986	294690	148842	281389	259172	340449	225622	207607	304492	225996	257035	153954	82640.3	205414	216256	268203
O96008	Mitochondrial import receptor subunit TOM40 homolog (Protein Haymaker) (Translocase of outer membrane 40 kDa subunit homolog) (p38.5)	TOMM40	TOMM40 C19orf1 PEREC1 TOM40	361	4	65245.2	58089.4	75794.9	82966.1	68807.2	119195	76733.9	85965.1	65718.9	81743.5	91458.3	75027.4	58987.6	94886.7	87648.9	58418.4	76130.6	51956.8	130109	98352.7	136647	98886.7	86711.7	105123	84244.2	99353	125193	83247.9	107113	77342	52364.5	50940	83971.1	77416.4	82756.5	77919.3	47089.2	48999.8	52908.2	67308.8	33945	59979	62673.5	71553.7
O96011	Peroxisomal membrane protein 11B (Peroxin-11B) (Peroxisomal biogenesis factor 11B) (Protein PEX11 homolog beta) (PEX11-beta)	PEX11B	PEX11B	259	2	58212.8	63239.7	64827.2	91586.5	38932.7	84625	63767.4	70507.9	103898	73768.5	74332.5	78234.9	73264.3	58700.2	78848.3	49539.8	27908.1	49985.5	67240.8	83361.6	82404.2	85108.5	64096.9	78412.4	54721.9	72623.9	93836.8	58315.7	65589.3	56451.2	48657.9	60352.4	67352.1	60590.5	77772	43901	49642.8	83835.3	65247	50344.3	40154.5	50243	59653.9	50186.8
O96013	Serine/threonine-protein kinase PAK 4 (EC 2.7.11.1) (p21-activated kinase 4) (PAK-4)	PAK4	PAK4 KIAA1142	591	4	970497	1.1508e+06	989090	979157	797097	940334	922534	1.16785e+06	962461	982526	1.08891e+06	861516	986506	1.23966e+06	1.28471e+06	797939	923777	1.01612e+06	720293	1.10701e+06	749577	602555	592105	801334	853639	856932	1.13748e+06	710469	875496	694554	940136	998323	1.03067e+06	923320	997056	863276	717423	969789	961316	754276	572644	686946	1.13467e+06	1.04103e+06
O96019	Actin-like protein 6A (53 kDa BRG1-associated factor A) (Actin-related protein Baf53a) (ArpNbeta) (BRG1-associated factor 53A) (BAF53A) (INO80 complex subunit K)	ACTL6A	ACTL6A BAF53 BAF53A INO80K	429	4	116101	95998.2	143963	134024	128160	170590	133921	156545	115437	178000	179869	151328	142120	214834	160443	113135	131243	117388	142171	153000	172505	130481	116920	129876	139791	151730	186063	119748	127574	102534	122055	130913	136226	130928	151544	133485	111470	122805	144031	89940.2	74619.3	116824	141192	176909
O96028	Histone-lysine N-methyltransferase NSD2 (EC 2.1.1.43) (Multiple myeloma SET domain-containing protein) (MMSET) (Nuclear SET domain-containing protein 2) (Protein trithorax-5) (Wolf-Hirschhorn syndrome candidate 1 protein)	NSD2	NSD2 KIAA1090 MMSET TRX5 WHSC1	1365	3	234019	315036	249813	214073	193727	272647	251000	321982	227396	290637	290143	256935	303946	284859	293251	198943	225993	237688	199096	321682	229957	203152	153282	206458	247668	214330	330848	193292	218823	168052	231413	314074	284860	207098	274682	196941	212615	289241	273433	196211	141331	206636	336643	270508
P00167	Cytochrome b5 (Microsomal cytochrome b5 type A) (MCB5)	CYB5A	CYB5A CYB5	134	8	282250	202725	250548	207571	194035	239004	237044	349041	182764	258957	269770	204277	218654	261727	211375	198389	223395	194552	528887	237606	607983	413480	475543	416722	450197	365656	579045	455082	530936	364402	240630	228103	243682	175287	307334	219407	220593	215916	258302	224999	110517	289882	190944	232487
P00325	Alcohol dehydrogenase 1B (EC 1.1.1.1) (Alcohol dehydrogenase subunit beta)	ADH1B	ADH1B ADH2	375	3	55389.1	67518.1	88603.8	80105.2	53997.1	98077.4	69541.6	79894.5	37205.1	86340.9	96148.8	85097.7	60726.3	87824.3	80431.5	63650.5	63431.8	68296.6	80148.8	69951.9	101250	96266.4	77125.4	94366.2	76661.2	88074.5	103976	82909.3	87172.7	66019.2	54050.1	51881.3	68875.4	70146	57626	65718	47012.4	49875.2	62014	64097.1	34221.8	55838.5	51030.8	64190.1
P00338	L-lactate dehydrogenase A chain (LDH-A) (EC 1.1.1.27) (Cell proliferation-inducing gene 19 protein) (LDH muscle subunit) (LDH-M) (Renal carcinoma antigen NY-REN-59)	LDHA	LDHA PIG19	332	7	408826	386794	482212	560878	504573	672984	417145	472033	359866	522348	543320	516418	422336	556591	562831	385814	416227	341469	463640	442153	496696	336635	334468	442815	403965	545047	470019	391321	464498	366202	334700	360794	449439	520513	631809	546931	324349	350826	331628	393194	213438	354997	371232	452614
P00352	Retinal dehydrogenase 1 (RALDH 1) (RalDH1) (EC 1.2.1.-) (EC 1.2.1.36) (ALDH-E1) (ALHDII) (Aldehyde dehydrogenase family 1 member A1) (Aldehyde dehydrogenase, cytosolic)	ALDH1A1	ALDH1A1 ALDC ALDH1 PUMB1	501	17	169902	159004	168707	126313	105717	168304	154604	188946	142073	157172	189232	142682	132788	318454	186071	186525	229967	147074	136797	145430	153186	129923	110327	149165	157905	142354	190453	141358	158453	110267	153692	143114	157838	111695	129356	117328	122427	139109	148187	119146	78585.1	109069	138239	245667
P00367	Glutamate dehydrogenase 1, mitochondrial (GDH 1) (EC 1.4.1.3)	GLUD1	GLUD1 GLUD	558	10	310760	201881	374931	318849	282440	395822	308063	333500	237496	382108	393222	334428	226697	588016	326005	335383	339629	195071	377069	247830	420002	353235	276102	372975	299400	330730	370226	266429	301435	220594	262347	198738	332686	287380	317916	316880	218270	236232	220337	272246	155839	209559	206001	448616
P00374	Dihydrofolate reductase (EC 1.5.1.3)	DHFR	DHFR	187	3	258744	322624	330892	326920	263590	378307	336711	372961	258660	298926	278745	346603	326468	386264	350424	273708	240964	259627	259464	405790	262069	307990	264844	317476	305530	295714	445192	279447	316447	255683	225501	276229	269203	300507	273387	303083	244842	229801	248272	229926	140599	222437	303993	254883
P00387	NADH-cytochrome b5 reductase 3 (B5R) (Cytochrome b5 reductase) (EC 1.6.2.2) (Diaphorase-1) [Cleaved into: NADH-cytochrome b5 reductase 3 membrane-bound form; NADH-cytochrome b5 reductase 3 soluble form]	CYB5R3	CYB5R3 DIA1	301	6	157296	97216.4	157777	208305	140347	189965	185527	191053	151935	125798	156689	178418	152344	311796	203274	200358	213539	124628	281671	183078	275583	193244	185755	176199	181357	177057	224417	185092	158160	137253	136077	108617	137623	211957	177985	157328	143391	140735	139931	101740	68017	132082	126441	247706
P00390	Glutathione reductase, mitochondrial (GR) (GRase) (EC 1.8.1.7)	GSR	GSR GLUR GRD1	522	8	116591	108928	157912	167289	156663	232891	139578	163741	111092	179758	196498	176588	97788.2	239941	165968	132422	145035	105946	190139	125069	223635	149235	134753	154056	149468	189352	189100	136544	155879	120677	129340	94799.1	169349	170081	182661	192733	105177	137655	151603	145970	73742.4	128442	108690	193602
P00403	Cytochrome c oxidase subunit 2 (Cytochrome c oxidase polypeptide II)	MT-CO2	MT-CO2 COII COX2 COXII MTCO2	227	9	57616.4	45153.4	117058	131689	93167.4	177082	105193	112150	69083.1	50994.1	64206.5	73598.4	32394.2	200730	95705.7	94894.1	103635	53273.2	323755	125370	351604	207687	184265	149699	136063	146409	174848	135302	165726	107766	60956.8	44573.2	97444.9	119882	107444	110296	67786.8	46738.2	59434	45840.6	19995.3	46762.4	31603.1	118110
P00439	Phenylalanine-4-hydroxylase (PAH) (EC 1.14.16.1) (Phe-4-monooxygenase)	PAH	PAH	452	2	5.10529e+06	2.5588e+06	3.34049e+06	4.06858e+06	3.66028e+06	4.74341e+06	3.2768e+06	3.87454e+06	3.48353e+06	4.50594e+06	3.67835e+06	3.59318e+06	2.32477e+06	5.08801e+06	4.75134e+06	3.9377e+06	3.887e+06	2.48e+06	4.51997e+06	2.86327e+06	4.86767e+06	4.18931e+06	3.8402e+06	3.95652e+06	3.33284e+06	4.07177e+06	3.96699e+06	2.92252e+06	3.78539e+06	3.96857e+06	4.1384e+06	2.32599e+06	3.2494e+06	3.70605e+06	3.73358e+06	4.0784e+06	2.90065e+06	2.68482e+06	3.11245e+06	3.47259e+06	2.00915e+06	2.57545e+06	1.93276e+06	4.10353e+06
P00441	Superoxide dismutase [Cu-Zn] (EC 1.15.1.1) (Superoxide dismutase 1) (hSod1)	SOD1	SOD1	154	4	324652	456832	468449	438180	339313	441734	470779	575165	392318	423387	446614	421980	531796	494646	524827	353894	404566	405136	368466	544282	341864	343441	270841	330007	383775	347410	560424	326930	373096	254131	326610	426889	454701	381289	370146	339897	345402	411322	390271	327761	198055	347277	494681	438166
P00450	Ceruloplasmin (EC 1.16.3.1) (Ferroxidase)	CP	CP	1065	2	309727	426798	342872	272805	305021	330287	317288	296523	247107	343664	301382	258345	348200	497544	442363	371140	441522	373533	292300	304589	299092	253642	213047	257680	265223	254124	363254	219591	273764	191215	296761	359526	424326	276947	409240	365078	254073	412759	385976	247582	188617	271216	411887	425904
P00488	Coagulation factor XIII A chain (Coagulation factor XIIIa) (EC 2.3.2.13) (Protein-glutamine gamma-glutamyltransferase A chain) (Transglutaminase A chain)	F13A1	F13A1 F13A	732	4	137991	106252	99142.3	64473.7	53719.6	62206.6	62672.2	66747	59268.8	69211.4	45892.5	54183.6	70635.6	166787	139946	88465.4	97771.2	102411	58238.3	63884.9	55620.6	62657.7	47080.9	63191	61434.9	59437.6	86729.6	54037.3	65311.2	41717.6	105901	97792	90893.7	50981.3	40288.9	45265.4	48404.5	61943.4	62286	52160.5	27031.1	47590.8	81260.3	120360
P00491	Purine nucleoside phosphorylase (PNP) (EC 2.4.2.1) (Inosine phosphorylase) (Inosine-guanosine phosphorylase)	PNP	PNP NP	289	7	151339	107436	151039	215491	139694	215202	175759	143681	132006	159544	177759	178995	93130.6	224076	168498	155432	152873	99100.9	200579	164962	191830	153167	184463	192302	148789	182198	196763	145599	153374	142836	126451	93558	140038	181484	154698	168067	130258	109597	151415	122486	69014.9	120175	93854	161569
P00492	Hypoxanthine-guanine phosphoribosyltransferase (HGPRT) (HGPRTase) (EC 2.4.2.8)	HPRT1	HPRT1 HPRT	218	2	278502	164329	276962	343377	261256	290387	278183	302970	272488	228300	237267	287118	227993	379586	332577	313396	359141	235234	252242	315682	233997	300862	192520	356449	211904	303280	281869	245297	241639	220919	315310	230914	240470	291884	281677	220358	262819	272691	349715	189703	191680	199330	147225	336177
P00505	Aspartate aminotransferase, mitochondrial (mAspAT) (EC 2.6.1.1) (EC 2.6.1.7) (Fatty acid-binding protein) (FABP-1) (Glutamate oxaloacetate transaminase 2) (Kynurenine aminotransferase 4) (Kynurenine aminotransferase IV) (Kynurenine--oxoglutarate transaminase 4) (Kynurenine--oxoglutarate transaminase IV) (Plasma membrane-associated fatty acid-binding protein) (FABPpm) (Transaminase A)	GOT2	GOT2	430	10	169992	94422.4	151036	286263	258656	343826	112351	165182	117368	158176	175215	143298	82389.4	291682	183129	149607	153214	107941	275404	168831	339964	233584	197100	236573	257779	267977	344868	245092	228944	157246	144382	105883	134550	258455	228007	230023	97113.6	86649.6	111691	127056	67094.7	94680.5	100965	178112
P00533	Epidermal growth factor receptor (EC 2.7.10.1) (Proto-oncogene c-ErbB-1) (Receptor tyrosine-protein kinase erbB-1)	EGFR	EGFR ERBB ERBB1 HER1	1210	4	359223	454680	442444	398196	318537	372966	416558	476606	392790	438151	426787	423850	470515	392309	449695	284498	332798	378436	349224	468627	346451	320779	272183	341981	376762	333357	504874	336256	369458	288352	291829	459613	458410	365712	388113	353935	373981	450504	381414	318312	231127	344575	468635	341688
P00558	Phosphoglycerate kinase 1 (EC 2.7.2.3) (Cell migration-inducing gene 10 protein) (Primer recognition protein 2) (PRP 2)	PGK1	PGK1 PGKA MIG10 OK/SW-cl.110	417	13	465014	326699	486193	565171	501609	726287	417653	454264	350648	501512	544243	461322	358065	693790	509965	419959	399994	299811	491221	354292	572148	501632	375780	466788	462953	549108	583321	424205	482110	389364	410225	306399	439731	533507	525428	533133	323161	364583	315447	371571	209657	304196	315669	473579
P00568	Adenylate kinase isoenzyme 1 (AK 1) (EC 2.7.4.3) (EC 2.7.4.6) (ATP-AMP transphosphorylase 1) (ATP:AMP phosphotransferase) (Adenylate monophosphate kinase) (Myokinase)	AK1	AK1	194	3	391241	316943	384328	238356	267925	350313	322442	331302	277502	298255	276647	336627	275318	468552	416107	409765	320855	317642	206003	245190	224019	340819	174693	245733	230929	211484	298757	202616	215169	200547	318662	277519	414845	306610	320630	314050	233280	278308	309857	236397	132665	193421	292347	436743
P00734	Prothrombin (EC 3.4.21.5) (Coagulation factor II) [Cleaved into: Activation peptide fragment 1; Activation peptide fragment 2; Thrombin light chain; Thrombin heavy chain]	F2	F2	622	4	353069	254854	262696	295711	202707	244769	267427	321224	251051	269942	310957	257108	280136	423398	269903	299224	365819	338470	171077	304252	228533	212319	207311	216586	217770	204306	287919	193933	223144	196995	325634	277136	297172	262956	236965	221330	222006	255278	326019	203070	131754	212115	245483	372195
P00736	Complement C1r subcomponent (EC 3.4.21.41) (Complement component 1 subcomponent r) [Cleaved into: Complement C1r subcomponent heavy chain; Complement C1r subcomponent light chain]	C1R	C1R	705	2	359836	440073	450574	408829	383622	433463	491166	443416	421645	531201	449778	466818	639249	488042	479644	356071	428778	453121	405976	498575	411038	371428	317535	404096	462766	387838	395316	418746	423022	362290	354176	395498	405986	442645	420291	355651	402168	461369	443811	393703	229566	261563	474186	431697
P00738	Haptoglobin (Zonulin) [Cleaved into: Haptoglobin alpha chain; Haptoglobin beta chain]	HP	HP	406	8	742071	444106	374728	248973	271651	389628	464284	576787	542047	549722	440588	457777	307974	460369	440425	323076	362466	363771	278040	283931	276882	269190	202028	254365	260212	290979	369715	224849	307913	192292	655939	423312	396890	248321	315245	299094	402778	446914	449753	430477	210145	369694	304805	398183
P00740	Coagulation factor IX (EC 3.4.21.22) (Christmas factor) (Plasma thromboplastin component) (PTC) [Cleaved into: Coagulation factor IXa light chain; Coagulation factor IXa heavy chain]	F9	F9	461	3	576553	299899	427660	362677	324136	405137	456314	537847	395826	444775	405775	449827	483854	681709	555229	487333	599034	552379	265469	474947	262574	257275	290948	338312	384715	359954	528841	333328	390763	235021	516163	449836	511076	321751	366306	346998	366880	506062	510352	317936	231943	403785	487792	547479
P00746	Complement factor D (EC 3.4.21.46) (Adipsin) (C3 convertase activator) (Properdin factor D)	CFD	CFD DF PFD	253	2	466494	529633	490113	390149	354698	430404	527817	523410	489426	420033	414774	447148	660766	608118	561887	414860	406053	489664	423261	589075	470477	409594	275026	439142	459202	429042	553969	417280	482032	366422	395492	568716	548219	455187	474111	394463	431255	460482	458198	413378	228314	350614	610201	399709
P00747	Plasminogen (EC 3.4.21.7) [Cleaved into: Plasmin heavy chain A; Activation peptide; Angiostatin; Plasmin heavy chain A, short form; Plasmin light chain B]	PLG	PLG	810	5	149274	103777	86377.3	120443	84742.5	110840	125495	155290	132535	110576	115615	102005	118566	187175	172699	142249	170540	170812	93764.8	111390	61150	60506.2	61310.1	79462.4	91259.8	119575	132802	76007.2	74486.6	56560.8	141031	101648	81157.7	78312.1	61367.3	122821	94314.7	100695	116876	82811.3	58097.9	78631.2	129044	146930
P00751	Complement factor B (EC 3.4.21.47) (C3/C5 convertase) (Glycine-rich beta glycoprotein) (GBG) (PBF2) (Properdin factor B) [Cleaved into: Complement factor B Ba fragment; Complement factor B Bb fragment]	CFB	CFB BF BFD	764	8	148781	141890	112205	131150	100241	115970	220319	266031	231553	207900	215726	164598	153313	252865	235322	153758	212366	218212	127730	143278	142994	118944	87462.8	96502.9	129803	132347	188338	117492	120977	87459.6	145033	119758	146883	106798	195363	96716.9	187811	205514	233755	149457	97875.3	155704	176452	200599
P00813	Adenosine deaminase (EC 3.5.4.4) (Adenosine aminohydrolase)	ADA	ADA ADA1	363	2	270967	245547	226608	164784	220064	232803	210418	208616	225562	256504	182305	164245	243263	252392	258949	232655	250049	218563	162537	211716	188243	183004	146989	164967	167229	136361	234555	136788	148565	151500	226436	311079	219461	132948	312183	203188	146154	242358	267537	165993	128886	207615	273320	256857
P00915	Carbonic anhydrase 1 (EC 4.2.1.1) (Carbonate dehydratase I) (Carbonic anhydrase B) (CAB) (Carbonic anhydrase I) (CA-I)	CA1	CA1	261	4	264299	338155	262166	324772	244740	331514	342460	381857	288662	294111	341000	325838	401490	329405	336762	207745	268524	295048	288520	386828	271505	226118	243713	256536	300072	271095	407607	246188	289828	222160	234139	297014	300686	300275	308892	275445	247769	269317	296304	215588	141655	243821	362778	268459
P00918	Carbonic anhydrase 2 (EC 4.2.1.1) (Carbonate dehydratase II) (Carbonic anhydrase C) (CAC) (Carbonic anhydrase II) (CA-II)	CA2	CA2	260	3	232611	271218	226476	268528	199273	254484	278154	287654	205444	236895	260509	229379	208886	282742	303374	223527	249700	215262	251334	268683	254000	205574	220350	255601	219175	231446	292834	195544	203612	186566	244147	213647	254153	265350	265729	255182	222023	289560	267655	184996	130290	200183	267869	257764
P00966	Argininosuccinate synthase (EC 6.3.4.5) (Citrulline--aspartate ligase)	ASS1	ASS1 ASS	412	8	141142	78432.9	81371	91176.4	83605.6	101547	89249.4	107271	75011.6	68156.6	140734	82350.2	64668.5	169591	132136	144434	89711.1	73870.5	107386	84072.6	104869	78884.3	65631	89735.5	70220.5	78200	88113	82709.6	77071.1	66499.3	119141	60902	83370.2	94355.5	93141.1	102021	60052.2	71695	64665.4	61747.7	36656.1	55261	88411.9	140356
P00973	2'-5'-oligoadenylate synthase 1 ((2-5')oligo(A) synthase 1) (2-5A synthase 1) (EC 2.7.7.84) (E18/E16) (p46/p42 OAS)	OAS1	OAS1 OIAS	400	2	200345	140038	189399	387142	177718	290390	342734	307578	209702	152766	214456	271831	124520	373317	287474	259491	260792	172752	449234	374992	359932	238791	377548	297459	250049	235769	364459	232209	235114	281825	147693	124098	177213	328564	166224	178734	262680	152176	198684	88916.8	65229.8	178465	115817	231325
P01008	Antithrombin-III (ATIII) (Serpin C1)	SERPINC1	SERPINC1 AT3 PRO0309	464	13	234009	199131	201451	88007.3	70163.9	107670	180429	232375	177091	158609	175709	158578	173638	340083	252431	247142	274662	257632	107906	156301	121819	103654	69605.6	113012	121477	109906	180640	100128	93829.1	77136.2	211866	187137	185213	96336.7	93874	93338.1	142510	154187	170628	122916	74172.7	107961	208766	261830
P01009	Alpha-1-antitrypsin (Alpha-1 protease inhibitor) (Alpha-1-antiproteinase) (Serpin A1) [Cleaved into: Short peptide from AAT (SPAAT)]	SERPINA1	SERPINA1 AAT PI PRO0684 PRO2209	418	22	856429	637703	558716	367064	249637	359788	853160	1.0322e+06	888166	786384	835888	774235	680591	1.09843e+06	1.04051e+06	777027	883791	1.10859e+06	281691	636227	290796	229788	241388	322495	459087	336925	670409	303803	382137	290655	644278	565427	534917	338953	309491	303333	614336	624544	770105	579011	283309	519051	675249	808336
P01011	Alpha-1-antichymotrypsin (ACT) (Cell growth-inhibiting gene 24/25 protein) (Serpin A3) [Cleaved into: Alpha-1-antichymotrypsin His-Pro-less]	SERPINA3	SERPINA3 AACT GIG24 GIG25	423	7	510531	624581	566673	450786	333006	531583	634796	682535	678600	587053	540698	551128	603512	882577	781191	610531	727514	762287	458980	524514	394524	471356	418984	649539	357671	388099	573153	394681	397849	376733	497872	605748	570220	395763	491827	382346	510270	523255	753737	404741	309011	468516	614166	614480
P01019	Angiotensinogen (Serpin A8) [Cleaved into: Angiotensin-1 (Angiotensin 1-10) (Angiotensin I) (Ang I); Angiotensin-2 (Angiotensin 1-8) (Angiotensin II) (Ang II); Angiotensin-3 (Angiotensin 2-8) (Angiotensin III) (Ang III) (Des-Asp[1]-angiotensin II); Angiotensin-4 (Angiotensin 3-8) (Angiotensin IV) (Ang IV); Angiotensin 1-9; Angiotensin 1-7; Angiotensin 1-5; Angiotensin 1-4]	AGT	AGT SERPINA8	485	5	294524	312981	330239	319994	282759	302332	323966	378349	280796	291402	325684	277335	348375	472396	468114	325510	361201	375190	291524	326400	318116	278377	241266	302545	284362	303085	442266	286373	326525	221598	316103	315348	324995	316544	338163	304928	243750	293259	281439	239646	139316	225590	376299	427789
P01023	Alpha-2-macroglobulin (Alpha-2-M) (C3 and PZP-like alpha-2-macroglobulin domain-containing protein 5)	A2M	A2M CPAMD5 FWP007	1474	17	206061	121028	128894	115701	106493	156068	151374	191047	163870	140146	141046	135141	125649	212430	228710	181348	162888	232359	125865	124419	135518	99788.4	102401	118757	124976	110613	156103	97256.8	110746	85343.9	188010	112526	126123	107059	122742	115388	107343	140515	142652	108728	66248	104146	148223	178739
P01024	Complement C3 (C3 and PZP-like alpha-2-macroglobulin domain-containing protein 1) [Cleaved into: Complement C3 beta chain; C3-beta-c (C3bc); Complement C3 alpha chain; C3a anaphylatoxin; Acylation stimulating protein (ASP) (C3adesArg); Complement C3b alpha' chain; Complement C3c alpha' chain fragment 1; Complement C3dg fragment; Complement C3g fragment; Complement C3d fragment; Complement C3f fra…	C3	C3 CPAMD1	1663	50	451043	267967	228526	198250	167263	208739	521775	534047	498685	413098	422820	390684	319332	497944	493647	399991	444073	494049	182270	307101	200912	156147	138334	198181	214817	175869	323116	187245	185800	128310	397062	264509	251053	168355	185157	182054	374879	361234	457840	288637	164030	266804	301643	361949
P01031	Complement C5 (C3 and PZP-like alpha-2-macroglobulin domain-containing protein 4) [Cleaved into: Complement C5 beta chain; Complement C5 alpha chain; C5a anaphylatoxin; Complement C5 alpha' chain]	C5	C5 CPAMD4	1676	6	146869	112263	208677	195248	124868	241854	183017	177412	121543	103983	129450	139626	118779	292033	138707	175658	178290	109642	321752	164634	364613	221658	251340	218135	195116	224499	278842	200836	237666	184623	88248.3	88037.4	195976	168345	140155	176055	141186	101483	125637	83142.9	46340	101401	109693	201303
P01033	Metalloproteinase inhibitor 1 (Erythroid-potentiating activity) (EPA) (Fibroblast collagenase inhibitor) (Collagenase inhibitor) (Tissue inhibitor of metalloproteinases 1) (TIMP-1)	TIMP1	TIMP1 CLGI TIMP	207	2	54237.3	57601.7	109247	63036.3	44939	74354.9	156969	147057	92251.1	71815.4	91609.3	49336	45695.2	176415	78317	74765.5	86850	35631.6	66324.9	93789.4	95930.8	81299.1	32492.7	35718	75891.7	59040	60918.3	76411	58945.3	39036.2	50385	67874.9	99463.3	69199.3	75671.9	96768.4	140367	77499.7	104463	68020.1	29344	62105.9	56305.1	118879
P01034	Cystatin-C (Cystatin-3) (Gamma-trace) (Neuroendocrine basic polypeptide) (Post-gamma-globulin)	CST3	CST3	146	4	282627	249104	346302	409364	343322	417335	319230	299283	352950	386272	501346	409144	246331	438053	328516	325923	317309	232851	409280	269928	448930	426035	356787	394034	314391	409962	430241	320942	339491	312655	258281	251533	379699	417714	385237	369430	305921	302240	440233	397041	205913	333943	244951	374111
P01042	Kininogen-1 (Alpha-2-thiol proteinase inhibitor) (Fitzgerald factor) (High molecular weight kininogen) (HMWK) (Williams-Fitzgerald-Flaujeac factor) [Cleaved into: Kininogen-1 heavy chain; T-kinin (Ile-Ser-Bradykinin); Bradykinin (Kallidin I); Lysyl-bradykinin (Kallidin II); Kininogen-1 light chain; Low molecular weight growth-promoting factor]	KNG1	KNG1 BDK KNG	644	6	364750	399990	379324	283575	243624	310563	378184	437679	342614	357299	336664	301231	399361	495924	457464	349640	395659	407155	221107	342583	223999	202451	180132	263786	282348	228314	402928	194962	245654	212072	344019	385634	405427	222492	310059	256333	330152	394017	417855	266933	177221	274337	421724	404168
P01137	Transforming growth factor beta-1 (TGF-beta-1) [Cleaved into: Latency-associated peptide (LAP)]	TGFB1	TGFB1 TGFB	390	2	877947	1.62422e+06	2.20124e+06	1.06919e+06	1.17648e+06	2.03314e+06	1.76847e+06	2.10231e+06	1.41408e+06	1.23756e+06	1.75506e+06	1.14213e+06	2.18511e+06	2.0669e+06	1.90098e+06	1.49043e+06	1.55586e+06	1.18744e+06	1.18312e+06	1.90834e+06	2.27691e+06	1.80527e+06	978445	1.76353e+06	1.03528e+06	1.23057e+06	1.9713e+06	1.27425e+06	1.49195e+06	836897	760475	1.50511e+06	2.01302e+06	979374	1.17299e+06	1.24934e+06	1.35126e+06	1.3038e+06	1.29305e+06	985260	533069	880766	2.14828e+06	926229
P01282	VIP peptides [Cleaved into: Intestinal peptide PHV-42 (Peptide histidine valine 42); Intestinal peptide PHM-27 (Peptide histidine methioninamide 27); Vasoactive intestinal peptide (VIP) (Vasoactive intestinal polypeptide)]	VIP	VIP	170	2	178519	373405	534370	457580	288899	529219	456767	545528	374354	528609	416085	505854	470511	594683	154965	314660	324600	426145	919872	483214	460506	382086	334659	403592	432407	411584	576253	343850	477379	270724	361806	303199	404913	386365	414586	338255	345436	464494	388990	354009	234159	366317	490563	327683
P01303	Pro-neuropeptide Y [Cleaved into: Neuropeptide Y (Neuropeptide tyrosine) (NPY); C-flanking peptide of NPY (CPON)]	NPY	NPY	97	2	104454	107973	166956	140545	171881	268077	188067	166516	150623	140665	206340	165727	129863	267948	174485	183702	166015	138924	226500	236853	264104	234545	179053	175891	192988	216699	321886	139943	223762	105997	102141	127794	183305	186241	178112	193685	116174	115010	146360	135325	53384.4	98951.1	130001	153491
P01584	Interleukin-1 beta (IL-1 beta) (Catabolin)	IL1B	IL1B IL1F2	269	3	298756	345353	414400	390688	315755	351715	446391	484856	372176	408423	441162	427876	486823	463374	490481	323704	369960	427254	293026	408099	355245	303298	245439	304158	350424	336956	449893	331180	343979	264040	305179	374933	422174	383101	345916	317260	340600	425352	361422	337553	214775	380379	499993	408560
P01591	Immunoglobulin J chain (Joining chain of multimeric IgA and IgM)	JCHAIN	JCHAIN IGCJ IGJ	159	2	530585	364896	125880	167811	160189	129974	233446	785645	645672	383439	399013	448373	381153	395712	474838	505050	452075	420418	136063	247681	136279	144879	116254	164041	192317	213310	257252	149883	164463	116637	685790	438618	164469	209340	173741	125083	207250	495855	531910	307432	153668	272716	351330	348969
P01611	Immunoglobulin kappa variable 1D-12 (Ig kappa chain V-I region Wes)	IGKV1D-12	IGKV1D-12	117	2	75354.9	86280.1	93864.3	115006	64766.4	86803.3	92826	88157.8	48462.5	96061.3	95257.6	88157.6	94861.8	148577	132208	117613	116949	113661	75269.3	94127.2	117444	82937.6	73242.9	80287.7	91794.4	69575	79785.5	63832.6	67776	78254.1	85923.4	82917	103786	80726	116878	102045	75910.2	107679	115177	76104.4	52512.9	77551.3	115180	127463
P01714	Immunoglobulin lambda variable 3-19 (Ig lambda chain V-III region SH)	IGLV3-19	IGLV3-19	112	2	187633	142923	121758	141578	132428	160922	163049	216684	221931	217589	222287	196119	149033	246133	211834	177070	226045	172104	160481	166101	144291	91945.6	113848	161711	144088	135666	180762	109573	155817	81317.9	157933	152631	133588	145830	162861	161539	122902	137802	172153	102690	87342.1	123798	149495	208677
P01717	Immunoglobulin lambda variable 3-25 (Ig lambda chain V-IV region Hil)	IGLV3-25	IGLV3-25	112	2	868778	1.52633e+06	1.24586e+06	1.1401e+06	1.05461e+06	1.08615e+06	1.34086e+06	1.23711e+06	1.33631e+06	1.34719e+06	1.33104e+06	1.17957e+06	1.44006e+06	670974	1.1804e+06	526886	837099	1.19295e+06	734136	1.36877e+06	775830	670244	677122	1.01888e+06	1.10243e+06	909631	1.36545e+06	1.0532e+06	1.14474e+06	820140	760395	1.52354e+06	1.08935e+06	1.11104e+06	1.14601e+06	940639	1.2431e+06	1.40723e+06	1.44387e+06	1.06766e+06	754252	1.18486e+06	1.36997e+06	653515
P01833	Polymeric immunoglobulin receptor (PIgR) (Poly-Ig receptor) (Hepatocellular carcinoma-associated protein TB6) [Cleaved into: Secretory component]	PIGR	PIGR	764	3	283323	354198	323633	301908	268150	324638	321623	326642	318014	327269	327739	279427	359629	347077	318190	243609	286344	257549	290017	317194	313920	233466	233421	312097	322231	309663	368902	317816	287267	216567	253822	303323	352603	309523	315071	289645	258264	313251	293547	211264	145670	247856	328627	278192
P01834	Immunoglobulin kappa constant (Ig kappa chain C region) (Ig kappa chain C region AG) (Ig kappa chain C region CUM) (Ig kappa chain C region EU) (Ig kappa chain C region OU) (Ig kappa chain C region ROY) (Ig kappa chain C region TI)	IGKC	IGKC	107	6	1.06595e+06	601969	566946	382011	190679	363245	924067	1.20942e+06	1.05061e+06	989142	1.15325e+06	818704	619058	842628	946196	990606	1.22908e+06	1.03552e+06	370587	868905	345984	262232	319506	618154	481292	384061	682028	393074	382738	271207	935191	1.05037e+06	538775	291604	272764	343800	967664	832975	1.11288e+06	711152	314860	536161	571986	853502
P01857	Immunoglobulin heavy constant gamma 1 (Ig gamma-1 chain C region) (Ig gamma-1 chain C region EU) (Ig gamma-1 chain C region KOL) (Ig gamma-1 chain C region NIE)	IGHG1	IGHG1	330	10	1.63311e+06	936463	654011	416058	340458	510824	1.32432e+06	1.67e+06	1.45638e+06	1.30367e+06	1.42615e+06	1.25043e+06	906595	1.5032e+06	1.59437e+06	1.38354e+06	1.65127e+06	1.70557e+06	447339	983439	436029	314980	338413	582825	692946	471015	972127	498723	477785	334081	1.3886e+06	1.08949e+06	657583	350400	379263	443339	1.05804e+06	1.38753e+06	1.41084e+06	919659	581746	856834	841733	1.29523e+06
P01859	Immunoglobulin heavy constant gamma 2 (Ig gamma-2 chain C region) (Ig gamma-2 chain C region DOT) (Ig gamma-2 chain C region TIL) (Ig gamma-2 chain C region ZIE)	IGHG2	IGHG2	326	4	490356	315045	217022	114519	112081	166715	542615	710893	649150	499808	610686	517584	335899	594249	590244	470278	582439	709947	162296	443095	185109	99268.1	104312	205398	288539	193121	426271	215103	211478	131060	372305	302495	189500	93298	120070	110995	446258	415511	535797	351625	189132	292607	331646	424554
P01860	Immunoglobulin heavy constant gamma 3 (HDC) (Heavy chain disease protein) (Ig gamma-3 chain C region)	IGHG3	IGHG3	377	2	121745	224007	265997	178593	110259	211929	181807	240732	154348	173431	187655	161283	235540	169216	205421	111794	148530	157374	132678	227219	114651	103265	86281.6	116184	144893	143385	217556	128457	158022	108016	117546	195817	187010	122310	147643	140033	125401	191498	156088	132424	82106.3	73635.6	205231	130006
P01861	Immunoglobulin heavy constant gamma 4 (Ig gamma-4 chain C region)	IGHG4	IGHG4	327	9	248390	156488	151519	159295	127309	134635	171894	245032	173646	218016	220670	166856	243104	436250	428649	320327	383065	416675	157594	229996	136324	130482	105714	173862	168663	155578	231143	152092	162191	109111	177706	152020	125683	115366	122580	124754	120876	144301	220351	129196	85205.3	129894	230382	309185
P01871	Immunoglobulin heavy constant mu		IGHM	453	3	267818	178619	211613	123552	184194	212169	246132	287875	243925	257670	271111	235163	250389	382099	345191	250801	265895	207488	239374	206974	222959	192916	193461	213750	222040	189094	311093	181132	205300	163487	215690	206670	186697	168667	224433	268613	202152	179540	273857	177600	113811	200836	250217	300377
P01876	Immunoglobulin heavy constant alpha 1 (Ig alpha-1 chain C region) (Ig alpha-1 chain C region BUR) (Ig alpha-1 chain C region TRO)	IGHA1	IGHA1	353	7	514716	257262	234607	185721	163763	153035	560001	738992	611951	377487	429558	415420	347599	538662	617608	466867	527623	594009	229132	392667	201279	187538	162823	312202	295354	258804	421802	252393	208038	158392	454097	263593	263765	194745	220182	201048	437059	510744	560165	280290	168494	293652	364383	409552
P01877	Immunoglobulin heavy constant alpha 2 (Ig alpha-2 chain C region) (Ig alpha-2 chain C region BUT) (Ig alpha-2 chain C region LAN)	IGHA2	IGHA2	340	2	37715.9	73706.8	45637.4	31628.8	40808.1	61417.9	52707.3	57132.7	59110.4	39801.1	38614	39264.6	62935.8	61596.2	42311.3	45238.7	59844.5	38941.5	27354.3	47057.3	37864.3	28935.8	37668.2	46622.6	29965.3	30599.6	46386.9	34790.7	17291.3	26986	36286.4	45798.6	37359.7	36196.9	29244.9	29686.6	25506.8	77391.3	69688.5	47468	16832.5	23243.8	90305	48080
P01903	HLA class II histocompatibility antigen, DR alpha chain (MHC class II antigen DRA)	HLA-DRA	HLA-DRA HLA-DRA1	254	3	205171	180005	200261	181725	150818	214197	186182	274525	191022	195011	203948	185528	160974	259238	250760	190914	211110	228571	188564	193184	191704	147829	128590	170100	186711	165941	232257	153522	176256	126301	214955	188467	197416	173511	167711	181496	143754	188153	205187	152286	93909.2	148752	137907	223966
P02042	Hemoglobin subunit delta (Delta-globin) (Hemoglobin delta chain)	HBD	HBD	147	10	355345	313308	349734	632335	312180	462265	609363	495384	387600	277484	362781	465767	276515	676836	568125	509119	459057	359928	598169	551985	495749	372655	580822	496436	343326	403438	534635	356238	346546	437732	341112	289852	367522	552513	377093	373232	534699	424574	432395	200255	198215	384870	317976	562173
P02144	Myoglobin	MB	MB	154	2	159398	117415	147547	173180	136143	177453	224752	207281	198591	159618	151721	223986	161090	173850	265636	154564	183666	183828	179769	119380	171688	142195	140196	139337	113763	155316	245129	129232	149122	181560	134896	150476	135565	180678	153247	154646	189928	191550	200808	133472	118695	179877	205014	211393
P02452	Collagen alpha-1(I) chain (Alpha-1 type I collagen)	COL1A1	COL1A1	1464	7	681403	541191	506942	358569	243695	324006	886018	801822	815565	617149	455257	452262	835490	744609	881413	530248	567588	557248	257641	396301	311017	253275	231934	324553	781289	423185	845542	302962	677206	399978	677177	494949	520198	354152	294799	277619	662801	670773	718122	460123	198101	341867	855389	510001
P02461	Collagen alpha-1(III) chain	COL3A1	COL3A1	1466	3	428297	333512	371368	293927	262915	360288	346789	382797	290698	383723	373412	325285	316212	432318	392227	329489	338970	262709	335870	308016	339049	304730	257329	322528	296351	278945	397919	276805	320293	228622	381365	320983	368514	293517	343388	344066	259532	375011	394031	278597	167810	246719	331729	459231
P02511	Alpha-crystallin B chain (Alpha(B)-crystallin) (Heat shock protein beta-5) (HspB5) (Renal carcinoma antigen NY-REN-27) (Rosenthal fiber component)	CRYAB	CRYAB CRYA2 HSPB5	175	6	424721	594118	506889	347516	324089	512418	535866	656953	447507	459631	509919	473287	672214	421184	649311	294134	399549	582936	340870	680418	332204	301700	259378	365720	402739	398123	580410	343558	433208	312452	402081	572998	524665	326225	404840	342198	395921	548689	526351	299308	226344	410502	686212	340484
P02533	Keratin, type I cytoskeletal 14 (Cytokeratin-14) (CK-14) (Keratin-14) (K14)	KRT14	KRT14	472	3	456014	245850	339490	385436	301752	377187	319394	325004	225226	386947	369941	329375	140401	518686	333301	335796	144961	199710	338293	275384	415651	424220	274845	321551	299891	389620	422703	270604	315489	290144	275330	168859	301308	336974	268655	284777	227706	147229	278996	313266	159466	211339	254023	270223
P02538	Keratin, type II cytoskeletal 6A (Cytokeratin-6A) (CK-6A) (Cytokeratin-6D) (CK-6D) (Keratin-6A) (K6A) (Type-II keratin Kb6) (allergen Hom s 5)	KRT6A	KRT6A K6A KRT6D	564	2	226094	349321	307686	181363	178749	250150	333347	355462	268251	249404	283063	327245	290251	316022	311564	242487	273046	229077	250962	295966	346049	211295	193139	232149	214850	192853	312187	202298	228833	214303	226461	294650	340106	204244	214760	228734	283660	291766	218368	178969	149284	204052	323122	291260
P02545	Prelamin-A/C [Cleaved into: Lamin-A/C (70 kDa lamin) (Renal carcinoma antigen NY-REN-32)]	LMNA	LMNA LMN1	664	27	684788	499480	639214	504460	436529	514066	472951	512234	386214	476406	420870	405233	455824	1.04249e+06	735473	711462	722776	499087	381666	339735	400843	355616	309408	407589	410693	455436	488713	352717	471033	383397	702038	464968	650050	523933	501308	420401	409611	413345	423938	375747	211462	349739	468351	822663
P02549	Spectrin alpha chain, erythrocytic 1 (Erythroid alpha-spectrin)	SPTA1	SPTA1 SPTA	2419	3	214647	215247	239957	214095	196553	294109	240924	213576	206316	239687	224442	221771	231778	312820	274948	234156	219148	225976	333619	236714	200857	226537	180314	159514	203239	201367	234344	181452	214228	164386	169234	190315	228025	204773	237294	211576	191698	226755	217118	178682	135450	122448	233598	274308
P02647	Apolipoprotein A-I (Apo-AI) (ApoA-I) (Apolipoprotein A1) [Cleaved into: Proapolipoprotein A-I (ProapoA-I); Truncated apolipoprotein A-I (Apolipoprotein A-I(1-242))]	APOA1	APOA1	267	23	1.03577e+06	983262	936266	473576	371791	516388	1.23157e+06	1.07042e+06	1.14693e+06	1.15174e+06	1.08921e+06	901913	1.43154e+06	1.99028e+06	1.9194e+06	1.48322e+06	1.818e+06	2.11699e+06	392997	1.11745e+06	383842	355587	421917	642810	905042	525050	1.20746e+06	536114	581062	565123	978178	920412	843534	439398	423067	423045	1.09003e+06	787166	1.10618e+06	916971	457207	752381	1.3773e+06	1.53118e+06
P02649	Apolipoprotein E (Apo-E)	APOE	APOE	317	13	137722	101320	125266	134326	98708.5	171342	151599	133635	114771	137107	129950	127809	111185	363942	159328	228095	278094	224582	130851	121323	153867	131151	94299.7	134054	107313	123586	139874	104933	113193	78693.7	120150	88706.8	112416	134544	119168	113791	148736	128960	128125	96085.3	100182	84242.2	108901	240252
P02654	Apolipoprotein C-I (Apo-CI) (ApoC-I) (Apolipoprotein C1) [Cleaved into: Truncated apolipoprotein C-I]	APOC1	APOC1	83	3	816250	596910	495810	587105	454544	592502	727660	770401	662876	729246	672084	698770	632211	929926	846064	731998	835363	911438	566998	702905	468557	490125	317904	462393	501608	560178	1.23599e+06	403057	361468	333870	691811	451679	514781	453849	330777	620378	601866	590910	624611	547856	336533	587133	560669	585935
P02656	Apolipoprotein C-III (Apo-CIII) (ApoC-III) (Apolipoprotein C3)	APOC3	APOC3	99	2	204529	89744.2	119982	106750	63590.4	106023	152890	149914	147815	157841	146010	123068	134180	199172	188493	139454	162423	231728	101356	103267	102538	89286.4	79258.7	96351.2	91832.1	92270.1	122899	63644.5	87724.4	80955.7	169965	98042.9	137450	85542.5	127674	91119.5	150060	140939	177831	115967	73637.2	95176.3	150349	186297
P02671	Fibrinogen alpha chain [Cleaved into: Fibrinopeptide A; Fibrinogen alpha chain]	FGA	FGA	866	7	440110	333702	300943	352969	270085	351027	426737	512660	465348	406320	339825	347979	376469	417776	467975	378522	365296	472685	339495	350057	330496	262563	211845	260402	271626	307298	371826	248713	319859	232720	388163	233158	314680	301832	341716	296207	358363	422579	490890	327866	192302	310851	320235	364960
P02675	Fibrinogen beta chain [Cleaved into: Fibrinopeptide B; Fibrinogen beta chain]	FGB	FGB	491	13	390047	148098	157886	157427	230983	171380	457881	545224	453310	392554	329215	317867	193493	308909	313394	287054	242098	339025	143563	201210	198095	120953	122608	186501	176509	149465	219197	130875	182731	111733	341855	138581	177130	143471	215451	111188	339027	372130	407622	287986	132344	233405	176218	229957
P02679	Fibrinogen gamma chain	FGG	FGG PRO2061	453	8	452761	152971	177780	149714	121294	177211	513930	489907	498189	490681	415350	382364	167086	310188	289621	301500	269904	366905	170437	252376	172744	140234	114892	186167	210711	153948	258047	165628	153246	120369	434148	137152	193845	168417	147159	142046	407436	341457	442668	335506	170397	312408	196440	244650
P02730	Band 3 anion transport protein (Anion exchange protein 1) (AE 1) (Anion exchanger 1) (Solute carrier family 4 member 1) (CD antigen CD233)	SLC4A1	SLC4A1 AE1 DI EPB3	911	2	163390	78027.8	148795	178347	152660	203462	113783	140084	106721	137292	147253	119262	92110.9	159760	144333	104815	128691	83910.4	178280	113316	185624	151673	118408	166321	142533	156487	181287	137512	151455	135498	151579	94033.1	139446	141903	168682	171283	86272.1	94558.8	128791	102771	64294.4	131115	132094	137213
P02743	Serum amyloid P-component (SAP) (9.5S alpha-1-glycoprotein) [Cleaved into: Serum amyloid P-component(1-203)]	APCS	APCS PTX2	223	12	778967	378230	322866	355600	228980	268983	394231	385172	367486	275842	250024	308997	530252	3.85908e+06	936955	2.3187e+06	3.54555e+06	2.56808e+06	210357	269376	246646	177759	183949	222631	214927	234101	325237	184758	183313	227854	769445	407568	337558	362510	282415	242744	319603	345152	386786	189636	139503	240466	596175	3.06196e+06
P02746	Complement C1q subcomponent subunit B	C1QB	C1QB	253	4	258956	228478	218875	295321	229321	327126	234512	296269	242081	291215	288753	224237	270297	376129	349096	269601	337789	239280	273197	230928	299661	310935	199564	260850	279131	268065	300344	240105	279645	216484	247221	200532	258220	279108	300730	274270	264917	329644	304180	209881	163864	221328	300703	296210
P02747	Complement C1q subcomponent subunit C	C1QC	C1QC C1QG	245	2	628875	516624	364194	293350	280511	425514	433704	519283	426545	451981	522344	410594	394433	676547	609187	511922	565629	545059	311241	444780	281368	351590	320689	312151	339908	347428	487606	367669	358817	238433	615604	487135	452569	329202	359609	342606	337826	523235	405226	360759	224274	367467	438001	609512
P02748	Complement component C9 [Cleaved into: Complement component C9a; Complement component C9b]	C9	C9	559	2	225450	248697	265594	214809	194507	263896	315195	299063	270410	312581	417527	289356	253357	313083	278820	197703	252010	236501	224537	275879	232988	192522	169820	224596	219467	203484	310310	209500	227606	165453	206968	234255	258140	225555	252483	199758	223818	249359	315967	274127	205747	251304	271348	266198
P02749	Beta-2-glycoprotein 1 (APC inhibitor) (Activated protein C-binding protein) (Anticardiolipin cofactor) (Apolipoprotein H) (Apo-H) (Beta-2-glycoprotein I) (B2GPI) (Beta(2)GPI)	APOH	APOH B2G1	345	7	219975	184486	176481	106190	95825.1	150167	184156	239376	198292	207855	205748	156965	186844	225026	211587	192078	269519	231994	99575.7	196065	141553	86948.9	88550.3	134172	114131	120736	155952	107738	114849	79812	197692	213372	143912	100009	106703	125498	171324	198578	224156	133297	79467.8	116770	186186	225716
P02750	Leucine-rich alpha-2-glycoprotein (LRG)	LRG1	LRG1 LRG	347	2	205008	406313	410794	319715	248384	338670	371308	443777	320948	349972	369283	357953	443732	286816	372183	176503	260989	334686	276882	494413	282446	249721	228634	346284	349916	304825	505163	301673	353221	245180	227583	404810	372671	278988	276067	255697	307503	354263	297599	279327	165567	263030	446200	270965
P02751	Fibronectin (FN) (Cold-insoluble globulin) (CIG) [Cleaved into: Anastellin; Ugl-Y1; Ugl-Y2; Ugl-Y3]	FN1	FN1 FN	2386	14	153930	156670	154257	120398	101628	113580	204345	240304	175781	195780	193637	183638	127297	197420	175533	137710	165436	156280	112936	148303	107091	91064.4	85385.2	116677	105053	107594	163796	101026	97570.7	77375.7	151174	154909	149395	109920	118556	101903	145135	168484	171030	136847	84465.1	140497	127119	147517
P02753	Retinol-binding protein 4 (Plasma retinol-binding protein) (PRBP) (RBP) [Cleaved into: Plasma retinol-binding protein(1-182); Plasma retinol-binding protein(1-181); Plasma retinol-binding protein(1-179); Plasma retinol-binding protein(1-176)]	RBP4	RBP4 PRO2222	201	2	268154	425062	434856	577448	256695	317084	453465	516780	414304	389307	404241	488324	446874	578277	576121	438275	466461	378582	560694	531100	544584	413743	527242	476888	431589	440929	525456	379127	384927	438392	406489	323143	500737	581486	343454	279840	446078	488262	480782	306187	256482	447598	309582	534709
P02760	Protein AMBP [Cleaved into: Alpha-1-microglobulin (Protein HC) (Alpha-1 microglycoprotein) (Complex-forming glycoprotein heterogeneous in charge); Inter-alpha-trypsin inhibitor light chain (ITI-LC) (Bikunin) (EDC1) (HI-30) (Uronic-acid-rich protein); Trypstatin]	AMBP	AMBP HCP ITIL	352	4	255475	177269	185923	138605	123457	167287	196567	242998	202471	206990	206630	191296	202827	406604	290987	253026	355900	320643	150736	199625	158094	121635	117387	176323	118067	136266	173917	126973	136424	115481	250553	237400	201188	139563	160225	170018	151343	199768	251249	173830	98946.5	142641	209784	334729
P02763	Alpha-1-acid glycoprotein 1 (AGP 1) (Orosomucoid-1) (OMD 1)	ORM1	ORM1 AGP1	201	3	113684	118724	101938	93677.6	43751	96537.7	192526	172862	176398	193097	148588	135670	103330	182727	67976.1	101228	150920	115624	65293.7	95306.4	73542.7	97836.1	71765.4	114278	93790.9	108947	142512	92691	95003	65852.9	82841.1	118785	113541	62285.4	84311.2	82029.6	166378	145972	205534	118114	105448	116550	77113.4	168439
P02765	Alpha-2-HS-glycoprotein (Alpha-2-Z-globulin) (Ba-alpha-2-glycoprotein) (Fetuin-A) [Cleaved into: Alpha-2-HS-glycoprotein chain A; Alpha-2-HS-glycoprotein chain B]	AHSG	AHSG FETUA PRO2743	367	3	139493	126607	109864	120636	84947.4	114036	141754	195058	175084	144445	141640	118683	119053	218672	175608	145094	169996	174746	79382.1	119865	81282.1	122230	61529.2	79042.1	99874.7	76037.6	139651	72815.2	132146	104002	125747	132130	115771	82239.7	78984.3	75834.9	120960	136203	165973	121995	64950.2	88786	137051	181640
P02766	Transthyretin (ATTR) (Prealbumin) (TBPA)	TTR	TTR PALB	147	5	235530	217170	170904	135095	110133	158934	177441	229806	196064	221931	177805	193906	188628	339349	265349	180593	239780	296686	124467	167657	131053	112821	94009.9	125092	158769	154227	201803	128810	130415	91487.3	189831	185364	197842	120069	159073	121247	138986	158011	159943	170591	94565.3	115576	169056	273907
P02768	Serum albumin	ALB	ALB GIG20 GIG42 PRO0903 PRO1708 PRO2044 PRO2619 PRO2675 UNQ696/PRO1341	609	47	4.86436e+06	3.28593e+06	2.38908e+06	1.20645e+06	1.05561e+06	1.56456e+06	2.55482e+06	3.57748e+06	2.85442e+06	2.47566e+06	2.78175e+06	2.28925e+06	2.36579e+06	4.8154e+06	4.03865e+06	3.5055e+06	4.26276e+06	4.18443e+06	1.4998e+06	3.1137e+06	1.45861e+06	984099	1.1421e+06	1.72984e+06	2.23342e+06	1.58346e+06	2.99747e+06	1.75526e+06	1.69424e+06	1.11565e+06	4.50344e+06	3.72957e+06	2.41279e+06	1.08813e+06	1.20233e+06	1.29889e+06	2.19953e+06	2.94027e+06	2.96338e+06	1.81354e+06	1.15489e+06	1.84384e+06	2.50419e+06	4.08304e+06
P02774	Vitamin D-binding protein (DBP) (VDB) (Gc protein-derived macrophage activating factor) (Gc-MAF) (GcMAF) (Gc-globulin) (Group-specific component) (Gc) (Vitamin D-binding protein-macrophage activating factor) (DBP-maf)	GC	GC	474	2	1.28184e+06	1.0563e+06	808043	946793	519143	1.40003e+06	815454	1.05603e+06	835524	754068	810136	708647	803043	1.20691e+06	1.26427e+06	882814	1.06917e+06	1.04403e+06	629198	1.01586e+06	663843	482381	552925	771645	733994	607937	1.06744e+06	690722	742453	530791	1.33053e+06	1.15646e+06	851273	506615	488860	274290	769095	729406	836700	226022	438056	676211	784453	936201
P02775	Platelet basic protein (PBP) (C-X-C motif chemokine 7) (Leukocyte-derived growth factor) (LDGF) (Macrophage-derived growth factor) (MDGF) (Small-inducible cytokine B7) [Cleaved into: Connective tissue-activating peptide III (CTAP-III) (LA-PF4) (Low-affinity platelet factor IV); TC-2; Connective tissue-activating peptide III(1-81) (CTAP-III(1-81)); Beta-thromboglobulin (Beta-TG); Neutrophil-activa…	PPBP	PPBP CTAP3 CXCL7 SCYB7 TGB1 THBGB1	128	2	363100	336883	342298	357817	321872	431978	379985	408000	291076	377408	362613	391641	345296	427448	402717	299399	443466	394240	317404	352406	426426	385973	283136	377064	340779	364882	431731	317169	367850	319776	409977	323279	421338	395605	391272	395038	347763	374978	394837	312556	266993	280190	370142	339235
P02786	Transferrin receptor protein 1 (TR) (TfR) (TfR1) (Trfr) (T9) (p90) (CD antigen CD71) [Cleaved into: Transferrin receptor protein 1, serum form (sTfR)]	TFRC	TFRC	760	2	176980	494456	419443	303668	227345	233864	423792	617665	322420	310574	410279	387931	546365	238233	449875	152446	226533	385458	239732	626852	219863	218437	176882	326230	328669	284282	574260	311253	297962	194895	161725	434093	367973	235995	278922	225428	278876	330981	301325	224465	108396	247630	490623	139213
P02787	Serotransferrin (Transferrin) (Beta-1 metal-binding globulin) (Siderophilin)	TF	TF PRO1400	698	34	521560	463432	390120	268447	227092	311996	623164	838173	672951	543875	634183	539887	533451	858496	842831	717035	889028	903029	275615	506876	278472	240538	223209	335305	367844	302752	521308	297513	323184	227969	486638	505815	381888	249940	266716	253961	551017	620266	709381	430762	263646	415483	512857	736576
P02788	Lactotransferrin (Lactoferrin) (EC 3.4.21.-) (Growth-inhibiting protein 12) (Talalactoferrin) [Cleaved into: Lactoferricin-H (Lfcin-H); Kaliocin-1; Lactoferroxin-A; Lactoferroxin-B; Lactoferroxin-C]	LTF	LTF GIG12 LF	710	22	319454	200600	380945	237450	154561	240163	1.90498e+06	714346	2.10686e+06	221402	219075	207917	207042	381157	736120	303289	315944	301987	214540	362460	222714	187743	161890	569608	167381	217827	285859	265929	201859	156690	324779	202694	377552	227321	207532	206914	2.01356e+06	606950	4.63537e+06	203754	112734	206012	218170	342007
P02790	Hemopexin (Beta-1B-glycoprotein)	HPX	HPX	462	11	888369	698253	571017	366376	329342	462801	550086	685947	574065	641728	600952	510832	594209	842988	741519	574429	763149	724907	399764	614245	463200	389752	318421	465059	445034	421713	663617	370107	410918	362669	785562	741427	575602	328231	399110	401963	483259	531364	624369	493419	308288	395572	562413	690883
P02792	Ferritin light chain (Ferritin L subunit)	FTL	FTL	175	8	171692	150032	208532	259955	180209	627759	178874	225715	207455	195218	209945	187361	239712	370115	290644	211800	230881	170573	243931	172278	250002	220793	180912	253801	199851	319674	290124	249958	181805	184893	164265	161640	220722	231130	232744	525646	124316	186760	163865	129595	103918	140768	155658	283286
P02794	Ferritin heavy chain (Ferritin H subunit) (EC 1.16.3.1) (Cell proliferation-inducing gene 15 protein) [Cleaved into: Ferritin heavy chain, N-terminally processed]	FTH1	FTH1 FTH FTHL6 OK/SW-cl.84 PIG15	183	8	148238	162490	167175	209392	165612	248525	177178	181416	138146	206138	170638	143057	151981	286735	218328	173171	186926	145447	177456	163107	186230	153694	128679	161969	144842	183163	198671	146675	163341	119311	147204	137932	168660	196574	193867	217897	136980	158188	148868	139494	84995.8	113620	139044	215980
P03951	Coagulation factor XI (FXI) (EC 3.4.21.27) (Plasma thromboplastin antecedent) (PTA) [Cleaved into: Coagulation factor XIa heavy chain; Coagulation factor XIa light chain]	F11	F11	625	2	105815	90806.4	93676.2	184180	91022	148555	194855	189260	123248	77533.8	129956	178992	83884.8	205704	171926	154383	159810	97015	246637	73823	214692	80523.3	214470	158913	137400	135196	206981	110149	135772	160749	83779.7	77899.6	110231	182374	103589	48407.6	135776	81448.1	121402	60090	42159.6	112618	54529	141860
P04004	Vitronectin (VN) (S-protein) (Serum-spreading factor) (V75) [Cleaved into: Vitronectin V65 subunit; Vitronectin V10 subunit; Somatomedin-B]	VTN	VTN	478	15	566553	239683	302247	286896	208016	276879	404844	437388	412466	309663	318083	332307	338839	2.25872e+06	657147	1.2946e+06	1.60568e+06	1.23364e+06	267231	283691	290929	201207	217994	247041	217322	215222	293373	201163	280740	203374	501778	262947	321425	259217	309069	271505	342543	328560	417080	262902	155023	232663	343081	1.78447e+06
P04040	Catalase (EC 1.11.1.6)	CAT	CAT	527	7	138146	143031	151584	207158	169564	216074	140144	214385	132161	186504	173479	156171	164046	274362	200664	156416	164843	138519	171314	116575	213344	161096	144606	173819	126103	166295	190990	122003	147026	126630	163254	118803	146524	204087	220977	165985	112161	137081	141532	136497	87570.8	139974	179684	216956
P04049	RAF proto-oncogene serine/threonine-protein kinase (EC 2.7.11.1) (Proto-oncogene c-RAF) (cRaf) (Raf-1)	RAF1	RAF1 RAF	648	3	288360	260593	263839	414716	270853	259851	334355	386893	295495	334466	352953	390546	430963	470453	452723	330573	333447	263787	360597	298902	352235	306765	282820	294571	216439	324434	391792	159263	284737	249544	274622	257596	265211	400826	369020	240245	270773	342128	321382	231712	159642	308928	304133	395450
P04062	Glucosylceramidase (EC 3.2.1.45) (Acid beta-glucosidase) (Alglucerase) (Beta-glucocerebrosidase) (Beta-GC) (D-glucosyl-N-acylsphingosine glucohydrolase) (Imiglucerase)	GBA	GBA GC GLUC	536	5	32578.5	23391.1	43303.8	40403.4	32631.9	67711.9	26168.7	31380.7	23479.8	26541.7	41898.8	27612.2	20689.6	40695.6	40145	29855	22867	24383.3	61946.8	36006.4	72576.8	52513.5	37901.4	44798.1	37900.3	46618.2	45365	39329.7	41126.2	30437.9	20997.8	19221.3	35088.7	26846.4	34710.5	36260.9	16188.9	18538.2	41838	25180.5	13521.7	22331.7	18552	31155.1
P04066	Tissue alpha-L-fucosidase (EC 3.2.1.51) (Alpha-L-fucosidase I) (Alpha-L-fucoside fucohydrolase 1) (Alpha-L-fucosidase 1)	FUCA1	FUCA1 Nbla10230	466	10	73162	59533.9	92246.7	83824.7	63439.3	123191	79047.5	113211	63645.5	93216.6	107490	86315	69083.8	118930	96453.8	76535.5	79148.5	76063.6	192456	90055.9	220036	145755	119735	126525	127255	118455	152818	130906	143552	89447.4	57451.6	47340.5	96297.8	93568.4	79417.6	95020.4	71983.6	74392.2	79135	84599.8	43419.1	68107.1	62295.2	94904.2
P04070	Vitamin K-dependent protein C (EC 3.4.21.69) (Anticoagulant protein C) (Autoprothrombin IIA) (Blood coagulation factor XIV) [Cleaved into: Vitamin K-dependent protein C light chain; Vitamin K-dependent protein C heavy chain; Activation peptide]	PROC	PROC	461	2	640040	1.20519e+06	1.22953e+06	878081	777650	795165	1.1534e+06	1.34456e+06	1.06702e+06	1.03133e+06	1.00091e+06	1.05434e+06	1.35429e+06	506499	1.07418e+06	414624	596972	903016	513423	1.13725e+06	535843	459868	515046	799199	817007	662097	1.12773e+06	781372	772287	554013	563137	1.23641e+06	1.19861e+06	838918	908020	749260	953070	1.22723e+06	1.02921e+06	790754	515288	829217	1.429e+06	459641
P04075	Fructose-bisphosphate aldolase A (EC 4.1.2.13) (Lung cancer antigen NY-LU-1) (Muscle-type aldolase)	ALDOA	ALDOA ALDA	364	22	342084	331014	417405	541669	532888	693514	365264	436771	313790	394291	408977	391235	349462	537230	471171	354728	386810	331591	402512	388570	436628	387486	304298	381560	377080	432586	494751	354814	420964	289357	336982	310123	401319	497606	617546	561999	281192	317767	322139	281856	186237	289370	355757	425935
P04080	Cystatin-B (CPI-B) (Liver thiol proteinase inhibitor) (Stefin-B)	CSTB	CSTB CST6 STFB	98	8	281247	220821	378689	384147	314781	464098	311907	338029	266146	397839	351717	304965	264190	535944	397768	278714	294955	203231	284915	255786	331312	313266	243555	317405	339639	361301	416544	288143	332975	296632	298802	215815	419048	372858	388657	413940	280844	374307	266131	342660	176754	283726	293158	457719
P04083	Annexin A1 (Annexin I) (Annexin-1) (Calpactin II) (Calpactin-2) (Chromobindin-9) (Lipocortin I) (Phospholipase A2 inhibitory protein) (p35)	ANXA1	ANXA1 ANX1 LPC1	346	35	314631	222489	344070	813101	902822	1.25681e+06	365021	361267	234152	268346	233555	198240	175740	828008	353542	413941	428277	185183	222713	210851	223222	196113	180905	251572	168882	205931	267358	196641	212398	191516	300967	218537	324336	792239	1.00195e+06	966534	272598	247915	245297	209510	112872	170004	198340	589925
P04114	Apolipoprotein B-100 (Apo B-100) [Cleaved into: Apolipoprotein B-48 (Apo B-48)]	APOB	APOB	4563	8	467205	998839	1.04424e+06	689631	561785	671528	973301	1.14614e+06	843568	896640	931243	906782	1.13421e+06	619124	1.00007e+06	428743	618796	848061	638715	1.29163e+06	711842	566659	504133	716010	894521	743280	1.22668e+06	829802	922305	513796	425762	986043	991759	608028	647791	588139	772634	832955	765292	650550	420725	649234	1.16137e+06	493189
P04179	Superoxide dismutase [Mn], mitochondrial (EC 1.15.1.1)	SOD2	SOD2	222	11	317925	296751	404703	371118	331018	663949	331812	375376	324350	360848	284687	281167	251451	507978	779511	342598	302413	292977	315784	360577	323678	257406	276038	466973	271797	326135	512987	413493	328750	286257	273697	267433	359671	340332	426811	479135	326373	259462	288612	260774	131235	234468	244902	315666
P04196	Histidine-rich glycoprotein (Histidine-proline-rich glycoprotein) (HPRG)	HRG	HRG	525	4	251160	224286	226980	150498	155978	191520	206072	211517	207689	208214	188906	170026	197969	306536	268357	236771	248528	228063	134065	174189	148155	147304	116511	163416	130027	140612	214477	118122	139475	117085	242019	207554	202457	127019	207466	168657	179748	206462	266427	146091	103039	168059	230257	224701
P04217	Alpha-1B-glycoprotein (Alpha-1-B glycoprotein)	A1BG	A1BG	495	7	183070	162582	153890	152029	113356	208043	188205	227831	190178	204780	197279	184438	139275	261829	217693	191552	224751	205012	150706	142248	165923	145835	136819	133790	156450	167035	194860	134265	158195	105935	223962	159438	172190	126986	174426	140099	147466	162883	203039	144489	89037.9	142326	149519	211086
P04233	HLA class II histocompatibility antigen gamma chain (HLA-DR antigens-associated invariant chain) (Ia antigen-associated invariant chain) (Ii) (p33) (CD antigen CD74)	CD74	CD74 DHLAG	296	3	681810	756997	728440	680934	585608	750705	724769	803506	565002	707128	726696	666262	811209	952972	948731	636563	663471	656715	691053	747116	726999	618143	513968	644682	707076	693968	820535	624957	744714	506106	627927	712260	768398	657333	770421	692377	499561	666259	587589	577714	314995	554344	830048	745721
P04264	Keratin, type II cytoskeletal 1 (67 kDa cytokeratin) (Cytokeratin-1) (CK-1) (Hair alpha protein) (Keratin-1) (K1) (Type-II keratin Kb1)	KRT1	KRT1 KRTA	644	5	409346	349084	339082	325596	301303	398596	341842	424449	308338	296431	431683	280284	273290	657442	517428	480179	453899	305465	259745	295018	324748	246259	193929	271497	249200	257303	317388	271761	242502	245118	398513	273711	354655	318903	346580	369993	335217	301669	337163	238092	152858	265293	293940	541049
P04275	von Willebrand factor (vWF) [Cleaved into: von Willebrand antigen 2 (von Willebrand antigen II)]	VWF	VWF F8VWF	2813	5	189826	272852	247925	207475	181750	222925	232318	318442	202292	229933	221886	231641	299014	258869	301208	185373	237578	257706	212874	227899	219915	167615	129730	181804	189908	187905	271705	167735	190144	126090	188665	243760	249022	195951	222328	179503	176714	246239	220013	166932	96810.3	166288	276397	215784
P04279	Semenogelin-1 (Cancer/testis antigen 103) (Semenogelin I) (SGI) [Cleaved into: Alpha-inhibin-92; Alpha-inhibin-31; Seminal basic protein]	SEMG1	SEMG1 SEMG	462	3	90867.4	47051.8	54455.7	49327.9	55104.7	65145.2	55157.4	78984.3	55454	64822.1	72614.2	78987.9	77146.6	58463.1	82285.5	36553.6	44625	54588.9	63985.4	48802.3	46327	40312.2	45191.4	44460.3	46068.9	56828.2	69602.6	55663.7	56452.4	49678.8	86264.2	46512.5	56234.1	53109.9	54126	58279.7	50930.4	63106.6	64193.4	47719.7	25672.2	47512.9	76467.5	73407.7
P04350	Tubulin beta-4A chain (Tubulin 5 beta) (Tubulin beta-4 chain)	TUBB4A	TUBB4A TUBB4 TUBB5	444	2	181428	153269	333215	340253	265890	652876	483891	336102	178483	290959	453875	322206	115819	487125	265179	240596	247385	258130	667576	370252	783269	627775	425031	452689	415795	443092	746901	472094	539799	308951	149477	162356	262960	328711	254612	347012	181653	106019	193288	239244	112732	161289	172763	270925
P04406	Glyceraldehyde-3-phosphate dehydrogenase (GAPDH) (EC 1.2.1.12) (Peptidyl-cysteine S-nitrosylase GAPDH) (EC 2.6.99.-)	GAPDH	GAPDH GAPD CDABP0047 OK/SW-cl.12	335	20	993975	1.10754e+06	1.18635e+06	1.35355e+06	1.15579e+06	1.29717e+06	1.13584e+06	1.22568e+06	968972	1.39747e+06	1.34642e+06	1.19155e+06	1.29651e+06	1.30995e+06	1.55012e+06	838103	954742	903932	946585	1.18234e+06	892850	745978	693934	982087	977134	1.17042e+06	1.31954e+06	767390	1.0923e+06	906376	857719	1.05099e+06	1.23553e+06	1.23781e+06	1.42493e+06	1.10648e+06	857710	970504	850013	993472	501239	809558	1.21376e+06	1.09475e+06
P04424	Argininosuccinate lyase (ASAL) (EC 4.3.2.1) (Arginosuccinase)	ASL	ASL	464	4	237048	257456	305683	234245	278882	387075	282142	349313	276229	312277	324542	291815	244846	364929	372487	273979	237316	238256	311519	282052	341293	309029	263489	314535	292378	271170	363887	267608	311158	227172	269669	215333	290020	263229	352258	294852	199584	264076	349813	272045	152015	274699	281057	318608
P04632	Calpain small subunit 1 (CSS1) (Calcium-activated neutral proteinase small subunit) (CANP small subunit) (Calcium-dependent protease small subunit) (CDPS) (Calcium-dependent protease small subunit 1) (Calpain regulatory subunit)	CAPNS1	CAPNS1 CAPN4 CAPNS	268	4	152383	110284	219669	212467	132797	263137	206051	219363	151310	138588	200352	206737	75312.2	311553	228600	186859	188719	129758	299996	233403	286298	218293	258157	248639	211800	211488	326504	224224	237657	188270	111293	106445	191582	199704	131647	150782	151452	91667.3	129680	111116	45795.6	121070	84750.6	155722
P04792	Heat shock protein beta-1 (HspB1) (28 kDa heat shock protein) (Estrogen-regulated 24 kDa protein) (Heat shock 27 kDa protein) (HSP 27) (Stress-responsive protein 27) (SRP27)	HSPB1	HSPB1 HSP27 HSP28	205	17	936515	979970	898042	748910	588558	831844	822329	1.0105e+06	708738	712211	652325	664015	980534	1.71566e+06	1.18069e+06	1.02459e+06	891157	633274	695512	982457	755129	676982	541414	712445	668375	596410	994598	578739	817166	528819	763252	824167	852588	676200	679958	658997	691466	692761	612718	515565	280760	455616	965588	1.26568e+06
P04818	Thymidylate synthase (TS) (TSase) (EC 2.1.1.45)	TYMS	TYMS TS OK/SW-cl.29	313	2	68576.5	71006.6	82641.7	153777	73601.3	135645	155585	137138	100416	83267	120854	142095	82543.9	125243	122845	101343	101249	84845.1	223024	159783	131861	112574	138037	126194	109662	111120	142271	111167	106653	117199	66361.3	84692.2	116477	141941	70811.3	138356	128873	87620	113042	80286.3	74255.6	103997	110999	119349
P04839	Cytochrome b-245 heavy chain (EC 1.-.-.-) (CGD91-phox) (Cytochrome b(558) subunit beta) (Cytochrome b558 subunit beta) (Heme-binding membrane glycoprotein gp91phox) (NADPH oxidase 2) (Neutrophil cytochrome b 91 kDa polypeptide) (Superoxide-generating NADPH oxidase heavy chain subunit) (gp91-1) (gp91-phox) (p22 phagocyte B-cytochrome)	CYBB	CYBB NOX2	570	2	75748.2	51291.5	93749.8	215920	108032	193236	192194	198091	73646.2	108273	171953	180863	57152.4	236805	152576	77159.6	149602	80785	474568	321447	338820	180742	306822	252761	187849	216827	262732	211271	176104	169239	104648	77871.1	117533	160552	132814	144003	145296	78929.4	77260.3	77067.2	38065.4	81813.4	91006	145435
P04843	Dolichyl-diphosphooligosaccharide--protein glycosyltransferase subunit 1 (Dolichyl-diphosphooligosaccharide--protein glycosyltransferase 67 kDa subunit) (Ribophorin I) (RPN-I) (Ribophorin-1)	RPN1	RPN1	607	10	79486.2	73156.2	99838.8	118268	103236	171107	91970	97032.9	74586.6	70718.7	61903.6	78930.4	79435.7	146385	104495	81900	94429.5	63389.7	187120	122121	211092	134691	105205	102613	81727.4	96203.1	118805	104184	97883.8	56594.3	77910.7	74560.4	90458.3	119694	138607	125855	57351.6	73933.3	76839.4	65400.4	37156.5	53233.3	93288.7	111146
P04844	Dolichyl-diphosphooligosaccharide--protein glycosyltransferase subunit 2 (Dolichyl-diphosphooligosaccharide--protein glycosyltransferase 63 kDa subunit) (RIBIIR) (Ribophorin II) (RPN-II) (Ribophorin-2)	RPN2	RPN2	631	11	44443.3	26749.7	56040	52915.3	45451.8	95313.1	39421.1	67994.4	37479	37040	45099	42976	24023.2	70972.9	53419.9	46056.5	46770.4	39435.8	109787	57870.4	128797	76078.9	67238.8	57742	48773.8	52548.4	96547.8	50653.5	52735.6	46706.9	31963.7	34270.6	45611	51937.3	42335.2	55663.9	28180.8	19396.3	34754.8	35604.2	11790.3	19809	28667.7	49819.6
P04899	Guanine nucleotide-binding protein G(i) subunit alpha-2 (Adenylate cyclase-inhibiting G alpha protein)	GNAI2	GNAI2 GNAI2B	355	7	109859	102133	102172	101842	82651.1	133745	117171	147689	108842	105232	105573	111654	116497	184399	152735	104299	129902	97611.5	113452	106868	111772	99111.7	72307.7	95542.6	104689	119848	138750	96687.1	101251	71329.9	95468.3	83992.1	122046	94429.4	106757	86299.4	88269.5	87692.7	99391	82701.2	54279.9	74675.6	118039	128535
P04920	Anion exchange protein 2 (AE 2) (Anion exchanger 2) (Non-erythroid band 3-like protein) (BND3L) (Solute carrier family 4 member 2)	SLC4A2	SLC4A2 AE2 EPB3L1 HKB3 MPB3L	1241	2	236223	251603	343597	226315	238005	343345	292680	283190	209669	227726	241295	238839	227507	333253	316557	265720	325985	249446	316411	253016	350346	217039	152393	259922	192324	152287	359511	181669	226693	196975	218878	167839	291543	179619	229138	196212	203883	182396	333983	207391	82175.3	197635	272370	298621
P05023	Sodium/potassium-transporting ATPase subunit alpha-1 (Na(+)/K(+) ATPase alpha-1 subunit) (EC 3.6.3.9) (Sodium pump subunit alpha-1)	ATP1A1	ATP1A1	1023	8	108489	138637	136389	150106	135342	175713	109691	137018	101544	128073	126829	114312	145420	279375	186414	133970	151715	113831	200610	107269	225982	136364	118710	127114	120530	104177	151686	117042	127236	91788.9	128668	117816	129517	127194	142154	127610	95277.5	133345	111863	88221.7	62007.2	136940	169321	189908
P05026	Sodium/potassium-transporting ATPase subunit beta-1 (Sodium/potassium-dependent ATPase subunit beta-1)	ATP1B1	ATP1B1 ATP1B	303	3	73796.9	60878.8	64242.9	62381.7	49603	83142	55536.1	64840.8	43121.2	39072.7	48944.1	29404.2	42975	152085	89795.4	79915.8	82391.2	36723.1	44528.4	44037.1	35608	37891.7	35596.5	54511.4	44617.7	29345	57669.6	39662	39246.2	19712.1	52751.3	38983.3	48485.2	54209	66661.7	67333.8	43196.3	55569.7	57047.7	43941.2	24785.5	40803.6	49741.6	103916
P05062	Fructose-bisphosphate aldolase B (EC 4.1.2.13) (Liver-type aldolase)	ALDOB	ALDOB ALDB	364	4	304821	226656	303770	372023	292859	393058	363864	369037	306968	318029	362524	356897	242459	445701	387547	317197	328719	202665	438659	359160	429531	355105	326492	369396	319469	347381	439759	315171	332459	281696	290563	220858	304865	395236	339051	339772	285144	277377	308004	273959	153823	282675	240037	383814
P05067	Amyloid-beta A4 protein (ABPP) (APPI) (APP) (Alzheimer disease amyloid protein) (Amyloid precursor protein) (Amyloid-beta precursor protein) (Cerebral vascular amyloid peptide) (CVAP) (PreA4) (Protease nexin-II) (PN-II) [Cleaved into: N-APP; Soluble APP-alpha (S-APP-alpha); Soluble APP-beta (S-APP-beta); C99 (Beta-secretase C-terminal fragment) (Beta-CTF); Amyloid-beta protein 42 (Abeta42) (Beta-…	APP	APP A4 AD1	770	2	489479	549900	504822	369317	342888	485872	568280	568371	475859	493801	581085	473744	487555	648033	624004	463923	524061	526676	360561	618390	398296	343853	305385	448383	433714	381343	665641	399963	429477	297478	529906	586015	583470	357547	415169	410249	477786	590955	643369	399281	232590	430809	568954	648153
P05090	Apolipoprotein D (Apo-D) (ApoD)	APOD	APOD	189	3	464166	342903	415575	738033	406990	534221	665128	579390	500435	302362	452960	633999	305454	753610	690861	541559	537940	394481	721499	647321	556633	415789	663270	544338	451779	492875	656901	423733	386494	600149	417274	289873	373796	701543	392973	376542	562207	504140	512886	221310	258526	488422	294872	549009
P05091	Aldehyde dehydrogenase, mitochondrial (EC 1.2.1.3) (ALDH class 2) (ALDH-E2) (ALDHI)	ALDH2	ALDH2 ALDM	517	20	260750	184721	304425	288767	280762	415132	231776	248360	196088	160581	168176	153149	187192	342928	342021	211208	227914	184335	245672	207319	291742	223755	202239	244851	199379	293145	271917	202342	228368	205236	231408	203021	257468	261912	284493	294439	179997	191044	199531	132535	71081.5	110936	185530	240280
P05106	Integrin beta-3 (Platelet membrane glycoprotein IIIa) (GPIIIa) (CD antigen CD61)	ITGB3	ITGB3 GP3A	788	2	158205	161328	159053	191917	157028	199839	182900	216012	158433	157370	174909	171627	223768	160964	193495	159906	162793	173096	170712	135951	165097	152811	136241	170890	140940	151767	249750	120327	163248	123590	149443	173231	159685	151299	136091	148314	123809	159817	173324	155223	83822.1	103448	227044	133625
P05107	Integrin beta-2 (Cell surface adhesion glycoproteins LFA-1/CR3/p150,95 subunit beta) (Complement receptor C3 subunit beta) (CD antigen CD18)	ITGB2	ITGB2 CD18 MFI7	769	2	681733	1.09514e+06	1.15383e+06	747631	582727	831321	963585	1.2436e+06	838462	940621	1.05204e+06	1.06933e+06	1.16086e+06	743571	1.06762e+06	462632	697966	936573	683638	1.21825e+06	764473	577862	541984	868066	1.00518e+06	778712	1.13911e+06	908750	988060	607656	455543	1.07675e+06	1.03334e+06	659050	608943	528597	794304	788427	754257	647653	353275	698022	1.11384e+06	515928
P05109	Protein S100-A8 (Calgranulin-A) (Calprotectin L1L subunit) (Cystic fibrosis antigen) (CFAG) (Leukocyte L1 complex light chain) (Migration inhibitory factor-related protein 8) (MRP-8) (p8) (S100 calcium-binding protein A8) (Urinary stone protein band A)	S100A8	S100A8 CAGA CFAG MRP8	93	5	444748	181923	364558	298583	172519	304054	424859	415415	459212	358681	348373	338647	440497	398494	361943	391196	569352	310604	234048	506446	200107	260080	228065	865493	302025	307098	312044	280764	322275	204455	522163	189912	403513	315513	225237	235672	460435	400662	733561	248829	108528	303039	319048	358710
P05141	ADP/ATP translocase 2 (ADP,ATP carrier protein 2) (ADP,ATP carrier protein, fibroblast isoform) (Adenine nucleotide translocator 2) (ANT 2) (Solute carrier family 25 member 5) [Cleaved into: ADP/ATP translocase 2, N-terminally processed]	SLC25A5	SLC25A5 ANT2	298	3	254910	325909	364336	281702	247820	364511	215168	347283	195259	301236	251698	317047	349951	406910	306821	235274	244227	240733	415691	239402	437134	345422	272769	279442	264567	312145	346107	255212	277900	210574	225890	275772	354683	274506	313428	297609	227347	227359	283686	181614	133208	202284	358080	329798
P05155	Plasma protease C1 inhibitor (C1 Inh) (C1Inh) (C1 esterase inhibitor) (C1-inhibiting factor) (Serpin G1)	SERPING1	SERPING1 C1IN C1NH	500	6	427998	282575	251990	171166	193672	204021	331218	318775	303449	282900	256006	304113	286521	433614	446330	350650	391157	458523	175306	268572	196948	206034	146244	194317	198371	221496	305560	188235	197029	167480	390004	273690	249074	171721	217212	207035	273516	254936	353200	197926	116213	247027	300201	330776
P05156	Complement factor I (EC 3.4.21.45) (C3B/C4B inactivator) [Cleaved into: Complement factor I heavy chain; Complement factor I light chain]	CFI	CFI IF	583	3	69600.4	67658.5	74141.4	73184.2	76683.3	113462	103343	100604	77962.4	68699.5	95378.5	83031.2	60961.8	145695	106306	88439.3	104179	100950	212525	77160	259760	129321	198629	193511	78290.9	100478	171359	89826.3	96382.4	88706.7	70236.1	58043.7	95706.3	61508	78581.2	99144	69690.9	82975.2	105420	83299.1	30791.3	67022.6	63561.2	111491
P05160	Coagulation factor XIII B chain (Fibrin-stabilizing factor B subunit) (Protein-glutamine gamma-glutamyltransferase B chain) (Transglutaminase B chain)	F13B	F13B	661	2	253814	281210	328732	453276	327987	408503	351890	495843	309979	374486	388471	377920	383706	390514	417118	286219	292457	331630	281436	369547	346980	310505	231471	327277	299166	324586	411395	287992	306569	239652	239550	300895	262660	358045	373044	306573	256868	331891	360340	266907	132479	234126	378675	287785
P05164	Myeloperoxidase (MPO) (EC 1.11.2.2) [Cleaved into: Myeloperoxidase; 89 kDa myeloperoxidase; 84 kDa myeloperoxidase; Myeloperoxidase light chain; Myeloperoxidase heavy chain]	MPO	MPO	745	4	266631	311755	339087	329606	244615	401680	377988	412935	318031	358241	376749	313781	344030	436823	402754	230298	304852	281216	340182	444817	348735	320574	237086	348477	313874	310855	503007	278719	265995	273486	272557	304809	336256	243619	285415	323554	257016	293647	368635	224749	166331	204585	359647	309510
P05165	Propionyl-CoA carboxylase alpha chain, mitochondrial (PCCase subunit alpha) (EC 6.4.1.3) (Propanoyl-CoA:carbon dioxide ligase subunit alpha)	PCCA	PCCA	728	8	108001	100637	154786	137000	131624	201277	142266	137647	114256	146432	202153	143677	132153	218085	164105	111206	147769	113816	218948	145453	246567	201144	144852	174741	153719	206427	218038	160439	188113	113831	122982	91657.4	139200	152517	153211	186276	104474	132787	117668	107873	97082.6	109977	152860	190513
P05166	Propionyl-CoA carboxylase beta chain, mitochondrial (PCCase subunit beta) (EC 6.4.1.3) (Propanoyl-CoA:carbon dioxide ligase subunit beta)	PCCB	PCCB	539	10	119011	124417	183258	183082	158432	232187	151172	182565	120960	172219	214676	178503	131968	251265	163063	144491	133897	112249	265335	230853	266630	234070	194222	234484	181875	233820	273214	199632	234469	186213	120680	141049	175468	184094	181417	177290	132790	107060	140280	162241	90487	129257	146730	163010
P05198	Eukaryotic translation initiation factor 2 subunit 1 (Eukaryotic translation initiation factor 2 subunit alpha) (eIF-2-alpha) (eIF-2A) (eIF-2alpha)	EIF2S1	EIF2S1 EIF2A	315	10	160377	120663	159868	211999	177827	283881	174894	183508	139852	238531	182085	157625	112034	236659	180295	159485	167416	92954.2	221182	162370	271424	246551	158661	205999	202334	171354	261117	164390	184659	152442	153922	123325	195708	209531	203981	229434	128053	142159	140458	145410	85559.9	138645	132082	187308
P05386	60S acidic ribosomal protein P1 (Large ribosomal subunit protein P1)	RPLP1	RPLP1 RRP1	114	4	312293	211786	371513	707112	465618	750408	318362	361816	244014	385022	421277	364490	175625	552749	418110	348717	314895	192282	550741	346621	585898	617385	465301	562404	350926	500305	559262	354849	430092	418945	246431	197659	330304	464739	474236	536837	218646	182557	220917	278342	113385	225229	187912	398477
P05387	60S acidic ribosomal protein P2 (Large ribosomal subunit protein P2) (Renal carcinoma antigen NY-REN-44)	RPLP2	RPLP2 D11S2243E RPP2	115	9	350345	265795	497966	703007	639235	1.00456e+06	426267	386191	333360	615165	536682	436128	240025	674921	429959	383222	388414	267217	597699	415924	714878	688552	571337	681407	499214	633184	681928	466720	537071	604707	321195	242557	530593	609182	756326	814039	327741	332515	332333	478417	223594	377464	264557	565727
P05388	60S acidic ribosomal protein P0 (60S ribosomal protein L10E) (Large ribosomal subunit protein uL10)	RPLP0	RPLP0	317	6	93078.2	115890	146005	133217	114454	214746	110364	117669	86180	107484	127765	112587	95182.4	171146	112446	100982	92837.5	93592.5	207412	126551	248389	181368	143531	175490	130051	160591	210011	145438	166727	131262	77377.2	97548.8	109089	130072	134520	173712	78882.1	92089.1	86368.2	91024.1	44981.9	62402.6	101836	111339
P05413	Fatty acid-binding protein, heart (Fatty acid-binding protein 3) (Heart-type fatty acid-binding protein) (H-FABP) (Mammary-derived growth inhibitor) (MDGI) (Muscle fatty acid-binding protein) (M-FABP)	FABP3	FABP3 FABP11 MDGI	133	7	132245	185575	165346	189067	145342	200566	189453	214475	164194	233175	243722	261575	184151	164138	219488	134893	155858	193847	158107	426418	149112	140900	144220	207507	253866	167938	395535	187474	262942	187321	137503	178734	141643	186830	145957	132946	143684	181963	162111	193299	101928	243572	183926	139298
P05452	Tetranectin (TN) (C-type lectin domain family 3 member B) (Plasminogen kringle 4-binding protein)	CLEC3B	CLEC3B TNA	202	3	302679	461193	398197	346937	274409	347777	416923	552051	372463	420541	460092	394218	535948	456825	477867	293656	373671	424517	287958	591706	299347	223482	252772	394338	328661	310896	480405	309468	372912	229977	285452	555700	445930	263657	309367	321996	329862	486174	540424	286307	189775	315751	518664	350516
P05455	Lupus La protein (La autoantigen) (La ribonucleoprotein) (Sjoegren syndrome type B antigen) (SS-B)	SSB	SSB	408	16	138578	126065	142809	182550	152902	250414	162522	152093	140788	164940	173966	141749	94922.4	209464	145268	128931	136388	97513.1	249178	191647	255525	243722	183842	199410	159081	184388	228331	151721	164938	147141	125142	112201	154316	169984	194269	203025	118799	141946	141650	123882	63581.1	115602	101075	181465
P05546	Heparin cofactor 2 (Heparin cofactor II) (HC-II) (Protease inhibitor leuserpin-2) (HLS2) (Serpin D1)	SERPIND1	SERPIND1 HCF2	499	4	351169	324441	342689	279624	264964	323491	316552	356139	312893	295350	320150	292914	304234	440575	380699	284511	319498	333557	261874	322682	320607	279888	203264	277647	255025	325638	370080	228899	276677	219142	313587	307587	300536	258153	306555	258409	289285	286979	365729	263294	180027	221513	318936	343497
P05556	Integrin beta-1 (Fibronectin receptor subunit beta) (Glycoprotein IIa) (GPIIA) (VLA-4 subunit beta) (CD antigen CD29)	ITGB1	ITGB1 FNRB MDF2 MSK12	798	5	110607	142430	126192	93079.8	86689.3	88125.3	154946	218259	140139	134971	145091	144109	140084	173412	182653	94077	124176	164005	132755	163876	133128	90629.4	80151.5	112774	116489	108460	182221	99864.5	126906	76834	104932	134427	130670	94665.3	119848	92814.9	100218	143453	129830	101942	63558.7	108124	144159	126002
P05771	Protein kinase C beta type (PKC-B) (PKC-beta) (EC 2.7.11.13)	PRKCB	PRKCB PKCB PRKCB1	671	3	818459	1.47048e+06	1.35544e+06	1.13927e+06	870690	1.08406e+06	1.23554e+06	1.35205e+06	1.08445e+06	1.12734e+06	1.15071e+06	1.12389e+06	1.37593e+06	1.11395e+06	1.36792e+06	806016	1.04189e+06	1.09717e+06	1.06344e+06	1.36755e+06	1.14903e+06	974703	867420	1.13453e+06	1.11473e+06	1.07714e+06	1.46914e+06	1.01926e+06	1.13992e+06	827864	874176	1.26848e+06	1.41239e+06	1.10784e+06	1.13557e+06	1.08158e+06	1.01299e+06	1.25918e+06	1.18926e+06	863043	653112	959355	1.39947e+06	1.11451e+06
P05783	Keratin, type I cytoskeletal 18 (Cell proliferation-inducing gene 46 protein) (Cytokeratin-18) (CK-18) (Keratin-18) (K18)	KRT18	KRT18 CYK18 PIG46	430	31	366539	209015	821476	939909	759232	1.11253e+06	531496	517596	337214	1.19017e+06	1.17067e+06	956691	241881	956698	384678	489486	512490	233439	1.02299e+06	596424	1.26091e+06	1.33121e+06	858898	1.09874e+06	958289	1.1638e+06	1.1397e+06	791799	947124	932315	293531	231394	663058	828681	778232	858092	376942	389260	360029	916459	462068	575025	305624	635560
P05787	Keratin, type II cytoskeletal 8 (Cytokeratin-8) (CK-8) (Keratin-8) (K8) (Type-II keratin Kb8)	KRT8	KRT8 CYK8	483	34	1.01865e+06	467951	1.13263e+06	1.35769e+06	1.2083e+06	1.71315e+06	856511	883022	650498	2.02447e+06	1.91246e+06	1.29449e+06	361626	1.76109e+06	848439	985362	869294	376405	1.55141e+06	820389	1.74637e+06	1.8894e+06	1.39806e+06	1.71021e+06	1.50466e+06	1.51342e+06	1.70878e+06	1.23266e+06	1.44876e+06	1.44829e+06	886553	428111	1.09863e+06	1.1698e+06	1.26387e+06	1.43317e+06	649774	721992	637888	1.51753e+06	892744	1.08323e+06	365764	1.27323e+06
P05937	Calbindin (Calbindin D28) (D-28K) (Vitamin D-dependent calcium-binding protein, avian-type)	CALB1	CALB1 CAB27	261	2	64119.9	49739.6	64269.6	137567	56664.4	92121.8	140852	114241	72593.5	49310.8	92911.3	68079.9	44450.4	134278	108977	100173	87980.8	68282.2	144382	127983	112658	79204.8	121293	105397	81939.3	96874.9	122842	97848.9	81096.1	80550.7	56731.6	46698.8	69864.3	135156	81301.7	79960.3	97002.1	64265.3	71675.6	43765.5	46885.9	76643.4	91374.5	104410
P05997	Collagen alpha-2(V) chain	COL5A2	COL5A2	1499	2	117176	86087.2	122132	206328	94467.2	157215	69026.5	82605.8	58888.8	126092	62468.8	91973.4	82105.3	140802	122337	130604	131103	69742.5	142946	92333.5	130686	154931	93975	65517.9	130479	162200	111497	77322.6	114855	82799.1	98599.8	100969	97473.6	95396.8	105742	136306	73414.6	67958.6	89005.7	98410.3	55046.4	61163.4	74271.7	121746
P06132	Uroporphyrinogen decarboxylase (UPD) (URO-D) (EC 4.1.1.37)	UROD	UROD	367	3	41504	31559.6	51807.7	35213.9	32523.3	58539.6	56091.2	54064.3	38252.2	36425.3	39713	49423.8	27597.8	65578.6	54311.1	50283	52009.8	39298.8	76502.8	40038.3	85475.9	47259.9	57941	38909.5	41084.2	49639.4	69245.4	34205.3	50503.6	45206.4	21667.4	20969.6	39999.8	50686.6	31530.2	40933.7	42973.4	32503.8	32816.3	27939.1	14522.6	32724.5	18872.2	32578.5
P06213	Insulin receptor (IR) (EC 2.7.10.1) (CD antigen CD220) [Cleaved into: Insulin receptor subunit alpha; Insulin receptor subunit beta]	INSR	INSR	1382	2	145662	188010	240292	188486	176249	242176	80286.6	195846	164897	187273	221300	132830	235880	237692	225255	165011	186223	158286	186276	216867	201984	193895	145363	193288	169795	236376	244618	154999	174406	166375	178023	228280	184718	216397	285562	192876	129250	162613	196508	152692	111645	150675	190539	203565
P06239	Tyrosine-protein kinase Lck (EC 2.7.10.2) (Leukocyte C-terminal Src kinase) (LSK) (Lymphocyte cell-specific protein-tyrosine kinase) (Protein YT16) (Proto-oncogene Lck) (T cell-specific protein-tyrosine kinase) (p56-LCK)	LCK	LCK	509	4	319320	688069	662110	546488	423511	511653	639061	883305	578156	568352	509297	626193	795272	482113	736125	351455	417215	551892	396869	838952	418812	390211	307334	474185	566033	508596	836914	488257	541586	390404	297993	657968	646501	470887	513884	427712	529646	561038	525173	431676	230633	430350	854868	394104
P06310	Immunoglobulin kappa variable 2-30 (Ig kappa chain V-II region RPMI 6410)	IGKV2-30	IGKV2-30	120	2	366847	871132	811490	319159	454134	601352	738939	786236	580827	623192	666096	633786	858825	533063	744501	261636	361722	587446	434790	1.16919e+06	479089	365743	365521	634703	671073	453926	1.18547e+06	608920	704865	423895	305390	699118	697074	478324	437841	451840	585770	537368	568341	467219	264180	507391	886652	364876
P06396	Gelsolin (AGEL) (Actin-depolymerizing factor) (ADF) (Brevin)	GSN	GSN	782	18	440388	490522	431109	265089	264042	344315	466313	579010	427254	436506	467075	462097	519589	639424	604613	378868	447373	431145	265620	470873	270660	207055	230693	316843	352307	315634	529620	294485	355528	241031	375407	424665	402179	270318	285297	255959	328284	407390	376489	308029	192916	320919	524211	447711
P06576	ATP synthase subunit beta, mitochondrial (EC 3.6.3.14)	ATP5B	ATP5B ATPMB ATPSB	529	27	647152	425303	723448	651732	621841	967422	537358	552586	396958	676440	588330	539958	401399	880822	643081	528535	509541	369447	622687	479187	705201	673306	555836	689964	537423	619035	714702	531401	608910	575512	577407	397148	655363	630491	698897	720634	406456	367834	365244	501272	232193	375080	388518	649150
P06681	Complement C2 (EC 3.4.21.43) (C3/C5 convertase) [Cleaved into: Complement C2b fragment; Complement C2a fragment]	C2	C2	752	4	122940	183020	202906	223493	151795	208324	258097	264587	209894	197850	237505	248617	203662	209431	234370	193284	197098	201872	253729	302011	246926	172265	190081	227374	193101	192835	303978	227738	217336	192328	127256	193729	246465	214202	189009	169088	199897	176209	216022	160834	106963	182402	213629	184643
P06702	Protein S100-A9 (Calgranulin-B) (Calprotectin L1H subunit) (Leukocyte L1 complex heavy chain) (Migration inhibitory factor-related protein 14) (MRP-14) (p14) (S100 calcium-binding protein A9)	S100A9	S100A9 CAGB CFAG MRP14	114	7	448831	214818	381811	306524	294170	261381	415475	398748	470780	275276	290607	233610	251849	383156	296562	396246	612423	197047	273408	502469	292801	286141	189401	887741	222053	271821	283403	253731	276653	208917	386490	258751	362534	343740	357566	213584	394365	386838	723077	205306	178342	228638	186245	372166
P06727	Apolipoprotein A-IV (Apo-AIV) (ApoA-IV) (Apolipoprotein A4)	APOA4	APOA4	396	9	182777	206620	196556	174269	160928	175676	253757	222311	226805	210845	219946	183743	216708	313580	250611	247679	278371	290726	155274	182058	149196	129168	120334	156233	156885	154721	214307	126868	158046	125734	175742	188933	198627	161123	183953	163118	206242	195025	231869	174707	107430	153332	215608	262625
P06730	Eukaryotic translation initiation factor 4E (eIF-4E) (eIF4E) (eIF-4F 25 kDa subunit) (mRNA cap-binding protein)	EIF4E	EIF4E EIF4EL1 EIF4F	217	2	59263.6	48887.3	57054.7	77632.4	64906.1	97563.7	57029.3	44770.4	69925.3	64765.6	81841.9	56094.5	38519.1	77862.5	50909.8	82356.4	52491.2	48132.2	68915.5	55661.8	81758.1	67178.5	54013.5	77252.3	55903.7	71334.6	90885.3	54650.5	64395	62167.8	34315.7	34523	45421.5	64438.5	63833.1	67327	72019	54563.8	42642.9	54199.3	35218.2	60021.1	56927.3	50193.8
P06732	Creatine kinase M-type (EC 2.7.3.2) (Creatine kinase M chain) (Creatine phosphokinase M-type) (CPK-M) (M-CK)	CKM	CKM CKMM	381	3	250229	472314	620476	468589	330229	742814	293865	375748	271748	578978	506821	328847	239189	292329	203690	182455	208942	140296	306984	340899	375903	192998	228559	293169	211700	260237	331785	178151	229987	200454	240939	429266	578144	364398	434022	724467	219261	278418	296042	386306	204144	252395	223240	224632
P06733	Alpha-enolase (EC 4.2.1.11) (2-phospho-D-glycerate hydro-lyase) (C-myc promoter-binding protein) (Enolase 1) (MBP-1) (MPB-1) (Non-neural enolase) (NNE) (Phosphopyruvate hydratase) (Plasminogen-binding protein)	ENO1	ENO1 ENO1L1 MBPB1 MPB1	434	19	225771	190084	233594	345775	341481	460946	237707	277803	214143	322358	341759	286427	185272	323515	302624	203342	205349	167664	391452	274196	423983	320740	253548	332388	278084	404559	401862	300493	332076	281642	190600	168489	212185	324934	339809	327316	165696	156857	196911	258842	116078	193367	174326	235024
P06737	Glycogen phosphorylase, liver form (EC 2.4.1.1)	PYGL	PYGL	847	4	215225	213035	284660	366271	282454	456312	248847	380515	190908	248146	280562	272343	179786	609620	241320	267863	282190	180153	325513	200849	412290	373992	283491	286501	285863	409445	300759	292677	338699	221372	171147	173819	275614	353477	311924	303614	190984	222174	205595	189540	112173	168852	171405	445082
P06744	Glucose-6-phosphate isomerase (GPI) (EC 5.3.1.9) (Autocrine motility factor) (AMF) (Neuroleukin) (NLK) (Phosphoglucose isomerase) (PGI) (Phosphohexose isomerase) (PHI) (Sperm antigen 36) (SA-36)	GPI	GPI	558	16	166918	143481	224850	229223	186482	333205	180577	226290	147416	196710	234576	239405	158933	249970	218651	139412	145560	149781	303919	269058	373750	285203	193640	258766	248259	297903	361238	253145	267592	214472	138333	116661	185414	212781	209010	230780	139197	120467	137362	150002	75243.7	129553	143958	181654
P06746	DNA polymerase beta (EC 2.7.7.7) (EC 4.2.99.-)	POLB	POLB	335	2	32433.7	33997.6	59411.3	48385.8	40226.1	76024.7	55424.2	66537.2	39697.7	50994	73829.6	63215.9	32433.4	59182.4	66607.4	33222.4	41333.5	40066.5	71025.6	93767.5	70950.9	50595.5	47219.4	67027	60963.5	69738.4	105849	60035.4	83404.7	55267.4	18382.4	39828	58903.1	47299.4	39279.9	34696.3	44389.6	19294.6	32639.9	45539.2	13273	26935.5	44515.8	35574.6
P06748	Nucleophosmin (NPM) (Nucleolar phosphoprotein B23) (Nucleolar protein NO38) (Numatrin)	NPM1	NPM1 NPM	294	13	139200	101783	231647	410176	398458	742422	173863	206726	155707	297829	282797	299696	114232	397129	244788	204437	201965	131692	613126	238342	790304	622902	421131	478938	298965	473926	504582	377753	475435	335393	136160	110056	212739	411925	379282	469872	142617	101348	137132	256306	78178.2	183322	140294	222686
P06753	Tropomyosin alpha-3 chain (Gamma-tropomyosin) (Tropomyosin-3) (Tropomyosin-5) (hTM5)	TPM3	TPM3	285	6	191488	343651	829574	784151	656252	671764	982785	1.57759e+06	824236	834883	817279	919025	1.61083e+06	469223	1.23812e+06	308373	533830	978915	356066	868088	451113	359224	269878	484231	708968	525764	941628	539634	655485	424763	164961	527283	781308	571709	803908	560669	811227	1.04592e+06	399460	616605	293739	720334	1.70292e+06	465368
P06756	Integrin alpha-V (Vitronectin receptor) (Vitronectin receptor subunit alpha) (CD antigen CD51) [Cleaved into: Integrin alpha-V heavy chain; Integrin alpha-V light chain]	ITGAV	ITGAV MSK8 VNRA VTNR	1048	3	154821	380918	348270	250842	206493	266185	353195	426673	293849	303660	367205	346224	367259	192717	334599	133429	208144	301786	212061	359810	236178	199753	186189	254764	307713	265220	423648	291237	334249	184479	122019	377084	313069	259341	220314	183045	265124	270756	224107	230847	124038	205079	378443	151402
P06865	Beta-hexosaminidase subunit alpha (EC 3.2.1.52) (Beta-N-acetylhexosaminidase subunit alpha) (Hexosaminidase subunit A) (N-acetyl-beta-glucosaminidase subunit alpha)	HEXA	HEXA	529	6	126839	102132	192750	194499	171900	266281	148909	194361	96179.6	205646	210584	165140	107539	240596	187036	149676	139059	113765	292374	138313	334943	277860	227042	218249	202295	273050	388145	224911	225439	178255	108150	81913.4	178135	184006	221034	282555	113937	109407	114989	197230	96561.9	146852	119500	191723
P07099	Epoxide hydrolase 1 (EC 3.3.2.9) (Epoxide hydratase) (Microsomal epoxide hydrolase) (mEH)	EPHX1	EPHX1 EPHX EPOX	455	5	134707	84405	115541	105929	90145	142885	115784	147935	100129	81292	107585	69837.3	86634	273460	179674	145303	164030	109931	101140	90629.7	125558	89275.5	71079.6	93604.3	94084.7	97587.8	128110	101706	83126.6	69388.9	121374	77221.9	113707	105748	101819	104781	73812.5	92870.1	89909.1	86051.7	37579.1	76171.6	86243.5	182952
P07108	Acyl-CoA-binding protein (ACBP) (Diazepam-binding inhibitor) (DBI) (Endozepine) (EP)	DBI	DBI	87	12	217897	202883	333602	578240	478215	639983	284167	342372	247949	506395	405270	367396	190414	467829	297098	278124	262860	231215	477545	259603	559356	548813	390913	451604	424480	500540	482773	377774	380421	407242	235080	178488	335604	559177	585797	537628	259963	285978	282064	401211	197703	276848	239447	366330
P07195	L-lactate dehydrogenase B chain (LDH-B) (EC 1.1.1.27) (LDH heart subunit) (LDH-H) (Renal carcinoma antigen NY-REN-46)	LDHB	LDHB	334	9	382655	383258	584924	547494	461090	706869	471133	552314	400073	486032	531962	504340	438494	740017	596676	419680	464160	372597	221220	495484	238286	200009	191642	307811	276827	245835	475360	302821	294838	188284	335849	397640	543334	563234	494534	544071	328121	380665	374939	349979	196710	344351	431223	594333
P07196	Neurofilament light polypeptide (NF-L) (68 kDa neurofilament protein) (Neurofilament triplet L protein)	NEFL	NEFL NF68 NFL	543	2	401736	220648	452786	401076	354976	455632	389588	471161	393406	410093	427839	247881	389904	520827	515264	436989	504402	399326	448404	386507	362022	367827	298604	334808	349614	467086	486861	318441	361631	287165	481521	360047	371858	485561	444929	378745	421950	448864	486913	394381	405816	394557	381728	474150
P07199	Major centromere autoantigen B (Centromere protein B) (CENP-B)	CENPB	CENPB	599	2	99901.9	189663	167822	180701	114199	161005	157790	182466	115291	149534	152742	114394	206927	162020	135059	130827	116946	147288	111828	162029	77454.5	142508	112179	149990	130384	130833	194807	86972.8	120831	112720	104841	148890	162804	134289	165987	121482	135538	147579	144762	129977	80733.5	127331	153782	161229
P07203	Glutathione peroxidase 1 (GPx-1) (GSHPx-1) (EC 1.11.1.9) (Cellular glutathione peroxidase)	GPX1	GPX1	203	4	279483	204203	214235	259105	217336	281043	224539	313209	207391	269770	280016	254866	259650	365702	318149	243403	261062	199250	258094	216575	303583	238392	192068	241949	230051	239630	303109	222666	235219	186572	255581	182509	239307	238094	293768	257335	197939	230237	239660	215025	114755	200052	217945	249348
P07237	Protein disulfide-isomerase (PDI) (EC 5.3.4.1) (Cellular thyroid hormone-binding protein) (Prolyl 4-hydroxylase subunit beta) (p55)	P4HB	P4HB ERBA2L PDI PDIA1 PO4DB	508	21	376903	281031	467774	1.01144e+06	1.08885e+06	1.23582e+06	402460	412236	304574	580030	550289	532679	267607	689104	448282	390626	387353	299628	682300	442484	756374	724360	571091	673358	598818	728765	750140	554023	662401	588874	337962	313110	436627	965058	1.16826e+06	957020	314673	351498	352519	442088	239513	415559	313897	491613
P07288	Prostate-specific antigen (PSA) (EC 3.4.21.77) (Gamma-seminoprotein) (Seminin) (Kallikrein-3) (P-30 antigen) (Semenogelase)	KLK3	KLK3 APS	261	18	322666	339011	1.53027e+06	615636	487850	1.03932e+06	1.28179e+06	1.1418e+06	686566	1.91842e+06	2.68702e+06	1.74231e+06	196625	1.48963e+06	336917	725596	923251	272750	2.31799e+06	862450	2.28023e+06	2.24159e+06	1.52768e+06	1.48422e+06	1.30876e+06	1.42777e+06	1.55054e+06	1.13575e+06	1.28788e+06	1.04838e+06	282726	341284	1.58406e+06	522673	620414	854500	1.10439e+06	897500	799155	1.55014e+06	992205	1.24169e+06	206779	1.24981e+06
P07305	Histone H1.0 (Histone H1') (Histone H1(0)) [Cleaved into: Histone H1.0, N-terminally processed]	H1F0	H1F0 H1FV	194	5	184828	126870	146320	209798	239065	209421	154718	191945	135543	130563	139048	128215	124660	184273	149335	135943	121595	149078	344431	132115	351638	170458	139502	153406	125547	109493	177634	142190	143912	113281	158228	121901	155469	251853	299038	182169	125334	140268	143058	120079	57068.1	119100	129543	164587
P07339	Cathepsin D (EC 3.4.23.5) [Cleaved into: Cathepsin D light chain; Cathepsin D heavy chain]	CTSD	CTSD CPSD	412	17	231824	136026	246750	322771	266200	651454	196592	211180	161084	313305	239429	202401	108811	330702	267783	214345	200473	143302	431860	219942	393909	381715	314573	410613	331383	327257	391361	293780	365100	299314	208872	128190	223094	292025	284707	488394	174395	144029	163307	233276	89247.5	152929	117661	252040
P07355	Annexin A2 (Annexin II) (Annexin-2) (Calpactin I heavy chain) (Calpactin-1 heavy chain) (Chromobindin-8) (Lipocortin II) (Placental anticoagulant protein IV) (PAP-IV) (Protein I) (p36)	ANXA2	ANXA2 ANX2 ANX2L4 CAL1H LPC2D	339	7	940373	655797	997934	512330	448682	795245	708428	772485	672783	460990	468518	492568	524225	1.92938e+06	1.16528e+06	1.15512e+06	1.025e+06	722776	425887	479584	388375	306639	297418	444583	365978	396955	610606	356799	498825	321686	826492	606664	819408	491977	485441	548063	527215	444943	623536	351224	201554	326960	453264	1.21738e+06
P07357	Complement component C8 alpha chain (Complement component 8 subunit alpha)	C8A	C8A	584	2	56645	97971.4	93242.1	63816.6	44093.7	54932.1	77533.1	84276.5	60296	80698.4	67349.5	60172.4	105588	120341	92363.4	49097.6	63429.4	67679.2	41173.4	62771	48037.8	29088.4	39122.5	52865.9	50220.2	47279.3	82532.8	44131	52818.6	42241.4	48840.2	84588.4	65909.3	68229	42632.5	46756.2	58123.5	74857.2	71948.9	45429.7	33120.9	61085.4	101941	184399
P07358	Complement component C8 beta chain (Complement component 8 subunit beta)	C8B	C8B	591	2	333861	366926	541311	419905	391664	479205	540464	617398	466147	537717	697118	553877	751502	509408	504016	326843	448389	912291	437878	613708	482102	387605	360228	473168	527989	487764	631771	463673	537277	401536	344930	690704	475402	463362	492037	404991	436183	803325	492757	426404	290221	423379	703386	355360
P07360	Complement component C8 gamma chain	C8G	C8G	202	4	393162	799188	663563	547458	430901	547543	652738	788663	553760	609900	648906	619312	809726	528977	714370	357771	506114	612710	482783	807718	517323	409821	401669	511339	560487	513655	774466	481702	589272	407004	348246	662296	624761	479279	545639	463237	498671	599038	545303	463913	288301	454684	765502	425649
P07384	Calpain-1 catalytic subunit (EC 3.4.22.52) (Calcium-activated neutral proteinase 1) (CANP 1) (Calpain mu-type) (Calpain-1 large subunit) (Cell proliferation-inducing gene 30 protein) (Micromolar-calpain) (muCANP)	CAPN1	CAPN1 CANPL1 PIG30	714	12	204554	131991	165244	171864	142683	197777	168418	179364	155870	177110	157733	158818	131748	287454	206526	184324	185366	120105	196116	145647	223851	180443	141910	165690	167579	157475	202437	155260	155235	127631	186269	131457	175371	142198	152403	166285	133652	144446	163502	134240	83317.9	113414	130132	212547
P07437	Tubulin beta chain (Tubulin beta-5 chain)	TUBB	TUBB TUBB5 OK/SW-cl.56	444	7	382136	452460	637438	710393	597663	924902	486041	593137	404262	475552	524015	452033	388770	635260	573768	373356	396953	374242	622935	500853	704923	600856	434824	514301	483617	551362	734862	489645	563908	429833	322109	441014	546406	657211	567760	592764	361931	323448	338227	358703	174443	261475	410854	400996
P07451	Carbonic anhydrase 3 (EC 4.2.1.1) (Carbonate dehydratase III) (Carbonic anhydrase III) (CA-III)	CA3	CA3	260	6	578879	947574	898310	746311	590857	731766	822337	912254	732873	764553	791251	834478	1.0431e+06	709328	613646	575046	708773	851562	594979	1.05856e+06	615818	561774	492236	698543	780987	679869	1.003e+06	620052	760652	586835	590857	940828	864619	593956	703593	612767	720501	939963	830451	663423	473289	753191	1.11892e+06	582500
P07478	Trypsin-2 (EC 3.4.21.4) (Anionic trypsinogen) (Serine protease 2) (Trypsin II)	PRSS2	PRSS2 TRY2 TRYP2	247	2	350825	475632	660716	451544	437773	930953	537169	650225	433525	417728	459244	449310	528527	538005	552655	444628	866894	430465	1.2868e+06	571264	571917	502885	447086	458588	484144	984776	726035	1.0105e+06	1.06815e+06	822576	291966	445143	651637	843303	549367	796937	479006	403207	502618	403694	200671	326767	600363	482208
P07585	Decorin (Bone proteoglycan II) (PG-S2) (PG40)	DCN	DCN SLRR1B	359	8	503924	677213	893555	236985	190893	242004	767589	754669	586675	465973	505828	423799	694410	492420	698214	395425	420813	489232	248963	440171	253706	192083	195299	248422	354342	274070	432072	221565	513961	261324	488261	675158	875986	243119	216102	180835	591358	541576	568269	358802	200242	337450	685359	421487
P07602	Prosaposin (Proactivator polypeptide) [Cleaved into: Saposin-A (Protein A); Saposin-B-Val; Saposin-B (Cerebroside sulfate activator) (CSAct) (Dispersin) (Sphingolipid activator protein 1) (SAP-1) (Sulfatide/GM1 activator); Saposin-C (A1 activator) (Co-beta-glucosidase) (Glucosylceramidase activator) (Sphingolipid activator protein 2) (SAP-2); Saposin-D (Component C) (Protein C)]	PSAP	PSAP GLBA SAP1	524	2	314125	594118	566842	465125	391043	478286	552517	640942	474195	554118	569223	551910	572692	420616	527981	319932	421148	501259	454221	722475	492309	483484	377991	593666	512743	515275	655156	506032	561402	393310	387637	559984	575951	454313	489890	505302	464926	529298	528273	445602	290874	451532	597838	346057
P07686	Beta-hexosaminidase subunit beta (EC 3.2.1.52) (Beta-N-acetylhexosaminidase subunit beta) (Hexosaminidase subunit B) (Cervical cancer proto-oncogene 7 protein) (HCC-7) (N-acetyl-beta-glucosaminidase subunit beta) [Cleaved into: Beta-hexosaminidase subunit beta chain B; Beta-hexosaminidase subunit beta chain A]	HEXB	HEXB HCC7	556	16	154831	170018	256857	158172	139126	244341	150565	216377	144172	212004	267853	240033	111613	234269	176818	166306	166542	142123	396177	186893	410793	316528	253671	305023	339801	383946	496742	357465	370486	313114	167831	122250	222620	175531	206040	188611	142309	172593	176117	176540	114708	165953	148407	195124
P07737	Profilin-1 (Epididymis tissue protein Li 184a) (Profilin I)	PFN1	PFN1	140	6	631826	842414	966254	718384	583370	892770	786458	870590	642276	801186	830369	745804	737591	697425	820504	454671	523633	571617	731220	1.0101e+06	820211	631849	612336	829731	761593	725482	1.1789e+06	689650	846698	611900	511799	718757	850693	588819	647272	704164	590042	548330	594442	545305	294317	500154	688708	517390
P07741	Adenine phosphoribosyltransferase (APRT) (EC 2.4.2.7)	APRT	APRT	180	6	185954	140999	206997	256681	234041	383470	184472	209392	152964	292925	316284	227107	144548	297943	215181	187289	193411	172350	354474	224751	423301	365665	263666	310704	263683	365803	350562	252894	292231	264389	170614	124224	213278	234049	282983	306106	142408	165931	150292	230720	114681	172946	152528	219453
P07814	Bifunctional glutamate/proline--tRNA ligase (Bifunctional aminoacyl-tRNA synthetase) (Cell proliferation-inducing gene 32 protein) (Glutamatyl-prolyl-tRNA synthetase) [Includes: Glutamate--tRNA ligase (EC 6.1.1.17) (Glutamyl-tRNA synthetase) (GluRS); Proline--tRNA ligase (EC 6.1.1.15) (Prolyl-tRNA synthetase)]	EPRS	EPRS GLNS PARS QARS QPRS PIG32	1512	7	65272.5	81054.2	110733	92251.9	99969.3	125660	88334.1	125532	66211.4	108551	101273	94893.2	103187	129437	144294	89009.5	116723	86910	96893.4	99332.8	104789	105392	79193.8	97309.7	88318.5	110084	131003	87890.9	99069.8	89082.9	99292.5	99619.2	115297	122654	141475	112937	79771.4	95050.1	92205.1	78597.3	43344.7	78178.8	103816	114806
P07858	Cathepsin B (EC 3.4.22.1) (APP secretase) (APPS) (Cathepsin B1) [Cleaved into: Cathepsin B light chain; Cathepsin B heavy chain]	CTSB	CTSB CPSB	339	4	127075	73661.8	136028	96818	88915.6	170220	97453.1	89264	80374.8	127958	117383	98084.2	60349.1	143685	98501.8	89150.6	80189.8	63187.9	155923	106687	149708	118435	107876	136191	102654	125484	133450	102748	132219	98449.7	125040	85917.6	140374	110541	94896.4	144586	92341.6	70739.6	97219.2	107250	53283.2	91198	76693	133788
P07900	Heat shock protein HSP 90-alpha (Heat shock 86 kDa) (HSP 86) (HSP86) (Lipopolysaccharide-associated protein 2) (LAP-2) (LPS-associated protein 2) (Renal carcinoma antigen NY-REN-38)	HSP90AA1	HSP90AA1 HSP90A HSPC1 HSPCA	732	14	306843	236158	380824	445724	437712	594600	344422	360337	276265	445969	461536	396095	235828	619371	388026	325409	358377	228690	450630	326460	525553	412538	377069	419479	358242	468520	491153	321040	405295	357975	267057	231086	362739	426214	434951	406599	266926	278530	290857	298937	183707	273464	243589	441748
P07902	Galactose-1-phosphate uridylyltransferase (Gal-1-P uridylyltransferase) (EC 2.7.7.12) (UDP-glucose--hexose-1-phosphate uridylyltransferase)	GALT	GALT	379	2	280540	356750	370168	316635	259524	284044	369581	417243	310680	334885	364360	313295	399718	296096	390433	238998	309094	339979	276599	387605	311534	232826	238253	295559	327149	284003	406086	275729	325467	246596	254725	287553	351947	296345	290043	259513	272730	336077	320297	261631	195542	264039	375338	269041
P07910	Heterogeneous nuclear ribonucleoproteins C1/C2 (hnRNP C1/C2)	HNRNPC	HNRNPC HNRPC	306	5	535268	363723	654685	814882	816249	1.07464e+06	526075	545765	488804	801976	720108	666219	307621	1.08372e+06	749066	743130	621269	454629	1.0689e+06	557110	1.15156e+06	1.08707e+06	802741	881279	701581	1.04098e+06	940564	728073	857678	823286	437611	355043	587386	817436	903541	826471	384478	478895	512774	641265	359615	493606	319071	834859
P07911	Uromodulin (Tamm-Horsfall urinary glycoprotein) (THP) [Cleaved into: Uromodulin, secreted form]	UMOD	UMOD	640	2	3.26619e+06	2.18684e+06	2.89463e+06	3.15776e+06	2.88534e+06	3.5681e+06	2.87078e+06	2.98136e+06	2.83442e+06	3.34074e+06	3.00996e+06	2.77495e+06	2.06041e+06	4.34051e+06	3.36211e+06	3.29821e+06	3.06612e+06	1.98999e+06	3.13987e+06	2.46855e+06	3.24883e+06	3.19593e+06	2.89881e+06	3.26332e+06	2.53251e+06	3.08075e+06	3.27969e+06	2.58532e+06	2.75203e+06	2.67087e+06	2.98733e+06	2.04288e+06	2.71487e+06	2.8575e+06	2.87652e+06	3.22133e+06	2.59885e+06	2.42693e+06	2.57496e+06	2.84161e+06	1.80223e+06	2.28995e+06	1.93251e+06	3.58243e+06
P07942	Laminin subunit beta-1 (Laminin B1 chain) (Laminin-1 subunit beta) (Laminin-10 subunit beta) (Laminin-12 subunit beta) (Laminin-2 subunit beta) (Laminin-6 subunit beta) (Laminin-8 subunit beta)	LAMB1	LAMB1	1786	5	298794	258125	242305	177255	159654	208933	200665	272249	209040	245875	237962	180522	188945	319805	285840	276332	354338	258710	232972	263569	257252	201299	169515	224708	199021	184256	279517	168265	208311	143460	287288	297314	246651	170216	203840	169825	173661	251787	249668	174205	104262	145342	210515	296627
P07947	Tyrosine-protein kinase Yes (EC 2.7.10.2) (Proto-oncogene c-Yes) (p61-Yes)	YES1	YES1 YES	543	2	61140.1	60577.2	117473	84589.8	59862.4	75139.6	105121	122328	120469	63316.6	105507	112532	124596	70330.2	121094	43579.1	67332.6	87016.7	63611.5	124069	77832.3	57353.8	36699.7	66830	90144.9	68830.3	137339	78034.9	86701.1	59702	52232.2	126155	130370	71391.3	72018.3	65269.7	92434.4	123624	117004	61759.2	40171.6	69599	147762	46246.3
P07948	Tyrosine-protein kinase Lyn (EC 2.7.10.2) (Lck/Yes-related novel protein tyrosine kinase) (V-yes-1 Yamaguchi sarcoma viral related oncogene homolog) (p53Lyn) (p56Lyn)	LYN	LYN JTK8	512	2	391142	600896	541068	406501	372779	412898	505363	658060	441206	517014	480968	478155	619586	496779	586087	310679	418656	472387	355256	589239	381894	342060	288784	401959	451096	429774	634828	366767	448509	310905	344280	560492	517108	371789	455272	376039	423116	548914	490818	385909	332472	389817	619733	331388
P07951	Tropomyosin beta chain (Beta-tropomyosin) (Tropomyosin-2)	TPM2	TPM2 TMSB	284	7	248910	239283	600839	613838	456498	491695	662268	1.0372e+06	573409	596984	585532	626141	1.13557e+06	428795	866414	292833	507656	636545	284585	590421	339436	335728	307506	316260	481793	412308	663934	400019	458981	300945	198817	388025	557878	509802	593146	436877	531022	672864	351380	435958	222960	502493	1.07869e+06	372557
P07954	Fumarate hydratase, mitochondrial (Fumarase) (EC 4.2.1.2)	FH	FH	510	14	112689	86567.5	159379	160232	108476	149607	143590	146961	100158	125590	144197	141990	132756	174931	148068	128186	111017	91617.1	199051	146441	204894	162572	158525	164332	140296	162704	193655	142508	151300	135965	101876	83410.5	134835	140945	143578	129125	111043	93647	117989	118120	64783.6	98437.4	102239	152073
P07996	Thrombospondin-1	THBS1	THBS1 TSP TSP1	1170	4	252743	558620	486091	366529	302026	359492	495295	669580	448136	452658	470571	415794	682723	398399	537261	239218	334344	443502	284443	559538	296033	245035	239508	331430	396764	331097	522129	316230	355694	258286	325498	533352	540722	282804	402353	345932	418016	559641	505706	327833	224728	368879	728728	337745
P08069	Insulin-like growth factor 1 receptor (EC 2.7.10.1) (Insulin-like growth factor I receptor) (IGF-I receptor) (CD antigen CD221) [Cleaved into: Insulin-like growth factor 1 receptor alpha chain; Insulin-like growth factor 1 receptor beta chain]	IGF1R	IGF1R	1367	2	1.49172e+06	1.51542e+06	1.58258e+06	1.48913e+06	1.36308e+06	1.75181e+06	1.51267e+06	1.63211e+06	1.43538e+06	1.22338e+06	1.17899e+06	1.79969e+06	1.7278e+06	1.92826e+06	1.25237e+06	1.3805e+06	1.5755e+06	1.38057e+06	1.59644e+06	1.1358e+06	1.49663e+06	1.38531e+06	1.19366e+06	1.66551e+06	1.41456e+06	1.39237e+06	1.9217e+06	1.3322e+06	1.46557e+06	1.16398e+06	1.50074e+06	1.44209e+06	1.4774e+06	1.67183e+06	1.4653e+06	1.553e+06	1.21068e+06	1.83623e+06	840587	1.55726e+06	739221	1.10951e+06	553178	1.47969e+06
P08123	Collagen alpha-2(I) chain (Alpha-2 type I collagen)	COL1A2	COL1A2	1366	4	510162	644149	597949	438886	307106	414664	739363	735283	700282	589177	545985	526833	712194	632226	771410	444709	521464	559367	371147	590894	415439	307789	306849	433338	604121	442068	772730	399139	565931	356053	439754	597606	549198	406574	410393	365572	528358	661906	657519	448251	274952	392406	736685	492797
P08133	Annexin A6 (67 kDa calelectrin) (Annexin VI) (Annexin-6) (Calphobindin-II) (CPB-II) (Chromobindin-20) (Lipocortin VI) (Protein III) (p68) (p70)	ANXA6	ANXA6 ANX6	673	27	378746	425830	432522	292851	269416	332772	432282	558183	369999	386634	371678	389429	530353	492704	631375	329410	379573	462763	248495	384388	272677	236931	204739	264477	305582	290397	434439	277929	313391	221314	328126	404607	420242	277397	299064	254699	302098	400136	353187	290002	160288	269786	522599	381073
P08195	4F2 cell-surface antigen heavy chain (4F2hc) (4F2 heavy chain antigen) (Lymphocyte activation antigen 4F2 large subunit) (Solute carrier family 3 member 2) (CD antigen CD98)	SLC3A2	SLC3A2 MDU1	630	5	370139	277494	468032	480814	341341	533111	437750	391087	288156	377171	369151	399620	316874	614623	458153	370484	413665	299933	567459	420465	602597	455640	463067	442424	405995	462737	593727	394399	464157	412260	310812	346636	422815	450466	418446	397945	346716	323802	318618	312457	185131	301486	477123	470887
P08236	Beta-glucuronidase (EC 3.2.1.31) (Beta-G1)	GUSB	GUSB	651	9	118900	102784	119111	162276	119822	156420	188517	149308	116557	134553	143368	168784	102572	201287	191082	130387	133449	115873	280203	170445	267823	200652	193888	220053	198001	165189	300266	241624	236632	150434	110426	119211	146656	145207	152576	141025	131011	128527	150662	111664	64240.4	120835	123655	161583
P08237	ATP-dependent 6-phosphofructokinase, muscle type (ATP-PFK) (PFK-M) (EC 2.7.1.11) (6-phosphofructokinase type A) (Phosphofructo-1-kinase isozyme A) (PFK-A) (Phosphohexokinase)	PFKM	PFKM PFKX	780	6	141536	144175	173545	167873	140910	198010	193073	200749	143722	167126	146803	161483	136512	255239	194775	171439	201062	143311	174875	156986	181807	164768	112448	132515	167375	171387	231178	127717	138085	108957	121210	136522	216205	128858	143273	165763	133261	172853	159969	126412	69936	126144	200406	184548
P08238	Heat shock protein HSP 90-beta (HSP 90) (Heat shock 84 kDa) (HSP 84) (HSP84)	HSP90AB1	HSP90AB1 HSP90B HSPC2 HSPCB	724	6	187667	147551	262334	373191	410688	571297	214786	201600	147679	345794	335227	255167	133470	402129	229742	202046	220649	132179	347101	211052	379879	337004	278690	320349	273918	345473	387400	244688	309060	287387	175670	136531	304796	406692	541083	490335	150763	155476	151850	248733	129136	167141	130349	318376
P08243	Asparagine synthetase [glutamine-hydrolyzing] (EC 6.3.5.4) (Cell cycle control protein TS11) (Glutamine-dependent asparagine synthetase)	ASNS	ASNS TS11	561	2	568633	505941	616624	823111	524826	686739	859335	786747	639529	510482	637260	747570	518655	850452	799437	686623	721383	607421	800773	789359	740015	542515	772404	752885	592126	591895	795369	575917	590406	701303	479235	493158	612436	762748	584155	547524	687542	653657	651148	337517	304930	580523	497116	681688
P08246	Neutrophil elastase (EC 3.4.21.37) (Bone marrow serine protease) (Elastase-2) (Human leukocyte elastase) (HLE) (Medullasin) (PMN elastase)	ELANE	ELANE ELA2	267	2	148738	60370.4	180456	152717	122371	221844	191154	188844	123489	76094	115998	123845	54992	333776	103463	155822	159316	107461	238114	113282	308699	200161	191621	154454	179130	224573	234550	168177	204107	137573	115710	89453.3	157868	159762	127670	147439	128967	97131.2	121512	86593.5	35040.2	82571.4	72594.8	234838
P08294	Extracellular superoxide dismutase [Cu-Zn] (EC-SOD) (EC 1.15.1.1)	SOD3	SOD3	240	9	210533	391738	315726	202563	165203	192713	270485	227280	226119	244721	206685	205950	286755	274673	336730	189673	278810	297293	184082	254433	172749	161072	145918	172371	167057	184487	218167	131017	147472	140860	186208	434512	300278	180677	178687	175923	250945	237102	304556	194332	124689	159431	286907	234956
P08311	Cathepsin G (CG) (EC 3.4.21.20)	CTSG	CTSG	255	4	564144	453060	474743	529325	392155	586336	435440	601011	474211	494867	502061	515500	455882	726611	603804	498662	557552	515403	438028	466521	518904	501741	422655	434131	444343	416895	562107	372602	428070	376054	481760	469242	522377	509329	546210	520968	441321	547410	570770	411958	236861	423575	551293	580890
P08397	Porphobilinogen deaminase (PBG-D) (EC 2.5.1.61) (Hydroxymethylbilane synthase) (HMBS) (Pre-uroporphyrinogen synthase)	HMBS	HMBS PBGD UPS	361	2	53846.1	44111.4	89350.8	53610.2	79218.6	98170.5	59349.1	64048.9	38939.2	73723.7	82146.1	80767.1	41693.5	79417.6	54092.4	62742.5	50029.4	29943.4	81942.4	68469.6	133302	82331.2	72873.1	91149.7	53465.6	71883	91118.1	68550.1	79173	58708.9	54226.4	32607.8	90439	60347.8	90889.1	96453.9	40623.2	37532.7	57687.9	63216.7	20786.6	38711.5	44165.9	96681.9
P08473	Neprilysin (EC 3.4.24.11) (Atriopeptidase) (Common acute lymphocytic leukemia antigen) (CALLA) (Enkephalinase) (Neutral endopeptidase 24.11) (NEP) (Neutral endopeptidase) (Skin fibroblast elastase) (SFE) (CD antigen CD10)	MME	MME EPN	750	6	81609	77043	97484	147760	94837	136860	126367	127770	88528.9	92519.3	103673	124175	75217.1	129860	123796	109918	108712	77320.9	180180	111970	171356	141364	135306	120544	104573	115237	143667	115880	101668	99289.8	81129	68883	93345.9	126375	124413	107135	91191.8	92931.7	85120.3	67589.5	56556.8	90601.5	83007.3	129900
P08493	Matrix Gla protein (MGP) (Cell growth-inhibiting gene 36 protein)	MGP	MGP MGLAP GIG36	103	2	152320	209828	317406	244798	100401	203990	235849	156803	117123	209838	198672	220948	332804	381289	335334	226855	316710	359622	127208	300824	167620	153452	147328	190591	109411	219179	331904	199760	183294	85294.6	167222	279456	180491	231770	263490	229926	198039	258700	202933	179001	74655.7	202525	337459	277445
P08514	Integrin alpha-IIb (GPalpha IIb) (GPIIb) (Platelet membrane glycoprotein IIb) (CD antigen CD41) [Cleaved into: Integrin alpha-IIb heavy chain; Integrin alpha-IIb light chain, form 1; Integrin alpha-IIb light chain, form 2]	ITGA2B	ITGA2B GP2B ITGAB	1039	3	250960	554581	512824	346924	290532	381656	514762	564548	380750	420626	425810	436821	526116	382574	450209	258991	328886	425811	387104	595640	400501	320899	292854	396098	459340	401922	605886	411338	473909	312915	242140	529538	492005	338075	364530	347617	408427	431621	417035	312385	210753	355076	527184	322499
P08559	Pyruvate dehydrogenase E1 component subunit alpha, somatic form, mitochondrial (EC 1.2.4.1) (PDHE1-A type I)	PDHA1	PDHA1 PHE1A	390	5	453521	774069	680224	592048	445935	566400	632211	830436	546234	623388	630616	620179	826663	545716	706967	410807	526143	629136	492337	820271	501422	396878	386166	530239	593002	510289	778544	499600	615698	378132	398726	771528	683210	508051	596567	482312	511575	651280	569230	425881	279856	473002	704261	478960
P08567	Pleckstrin (Platelet 47 kDa protein) (p47)	PLEK	PLEK P47	350	3	200517	212732	269158	185156	128317	312434	182495	258965	131728	230813	373393	372870	186367	326102	200366	241508	221319	233812	457737	361467	397602	276804	346320	335564	270155	242862	313237	281230	246016	265681	179311	163276	260980	309874	210828	210466	236472	143710	197546	197133	116229	199607	198019	257818
P08571	Monocyte differentiation antigen CD14 (Myeloid cell-specific leucine-rich glycoprotein) (CD antigen CD14) [Cleaved into: Monocyte differentiation antigen CD14, urinary form; Monocyte differentiation antigen CD14, membrane-bound form]	CD14	CD14	375	2	221395	172741	239192	372098	196125	321894	418570	306442	219749	177112	236940	248116	154465	480393	334191	307084	295825	187703	424442	498664	296685	256049	333938	296479	204300	283537	383523	251687	241162	248943	206876	155171	252823	343602	250785	255730	126254	165774	195531	118399	77017.1	171954	184395	344541
P08572	Collagen alpha-2(IV) chain [Cleaved into: Canstatin]	COL4A2	COL4A2	1712	3	270503	265393	351756	237132	212461	241604	241531	283824	218934	243142	235962	241410	256344	528826	360814	220309	243925	224026	228255	227157	227455	116420	171505	214838	237601	227993	299150	160245	282141	196943	347995	226358	330372	206508	238070	193627	200252	246705	226001	204960	121351	219493	255958	286695
P08574	Cytochrome c1, heme protein, mitochondrial (Complex III subunit 4) (Complex III subunit IV) (Cytochrome b-c1 complex subunit 4) (Ubiquinol-cytochrome-c reductase complex cytochrome c1 subunit) (Cytochrome c-1)	CYC1	CYC1	325	4	169965	190667	182072	233665	162611	259690	241313	245097	139507	164703	165449	196288	131136	257197	198956	182819	177325	190406	266847	204386	269462	180872	252854	183399	155072	196731	225393	169311	195492	185255	130141	182494	242230	214098	189225	178225	159080	146772	144842	145016	87295.5	152940	135871	185793
P08575	Receptor-type tyrosine-protein phosphatase C (EC 3.1.3.48) (Leukocyte common antigen) (L-CA) (T200) (CD antigen CD45)	PTPRC	PTPRC CD45	1304	3	395707	317991	665443	616372	535046	755880	757298	769978	606365	531528	670847	615428	639877	734463	398663	404757	563937	553553	682002	615693	603800	466005	519895	608622	652379	586086	781760	568745	522249	468744	427304	577683	585041	639112	580176	504788	541801	593443	544132	392941	291600	475205	568202	402072
P08582	Melanotransferrin (Melanoma-associated antigen p97) (CD antigen CD228)	MELTF	MELTF MAP97 MFI2	738	3	458094	663715	588908	486342	466070	557078	572374	646994	468914	577311	554196	485581	638760	602611	668455	448404	504700	536268	435865	588809	487714	404939	362515	536534	462942	453218	638760	418129	505134	361927	485721	617284	582754	444355	603258	492384	435036	589259	553282	402868	280033	426871	662173	537882
P08603	Complement factor H (H factor 1)	CFH	CFH HF HF1 HF2	1231	6	387813	304104	276910	238305	202801	276547	345827	396155	297610	335535	336920	330822	293610	454657	407186	336374	422734	381441	227220	299815	231793	189379	186125	231649	247562	237577	349300	211804	222634	179695	370120	310567	307651	191174	243435	231129	285078	350399	380910	271012	170412	283607	342920	376050
P08621	U1 small nuclear ribonucleoprotein 70 kDa (U1 snRNP 70 kDa) (U1-70K) (snRNP70)	SNRNP70	SNRNP70 RNPU1Z RPU1 SNRP70 U1AP1	437	6	195040	168159	241119	247872	234316	301395	174096	215822	163895	244997	235842	195362	253243	293165	217249	186060	236107	185811	284847	194664	297954	281148	230459	226979	232201	260345	309406	188701	276480	190293	164782	144345	239846	206305	228793	257233	164711	188650	171011	181355	116885	149877	168910	223258
P08631	Tyrosine-protein kinase HCK (EC 2.7.10.2) (Hematopoietic cell kinase) (Hemopoietic cell kinase) (p59-HCK/p60-HCK) (p59Hck) (p61Hck)	HCK	HCK	526	2	408382	385310	406841	415763	322424	420572	402232	408331	302274	402254	375658	344598	387666	370420	488177	274750	336259	280497	329459	429210	328773	205189	253683	365861	331299	315875	477643	299474	368634	273732	348332	370939	397551	337452	406288	351112	279759	339893	347463	301056	174645	324049	399867	296528
P08648	Integrin alpha-5 (CD49 antigen-like family member E) (Fibronectin receptor subunit alpha) (Integrin alpha-F) (VLA-5) (CD antigen CD49e) [Cleaved into: Integrin alpha-5 heavy chain; Integrin alpha-5 light chain]	ITGA5	ITGA5 FNRA	1049	4	193466	177094	205130	169105	140736	206226	216416	238760	168681	208203	162808	285844	129836	265410	245546	158390	197278	207066	194684	196003	192516	179828	143085	166057	182156	139426	251999	154007	206816	113238	166791	178768	192687	152257	178852	176534	189772	149598	151348	149228	71836.1	187601	184620	189461
P08670	Vimentin	VIM	VIM	466	34	755438	679508	1.58396e+06	617039	429470	609128	733326	659554	713631	799333	713043	683093	810496	1.91369e+06	1.03952e+06	961969	1.15229e+06	704031	476987	607269	459921	350702	408857	558254	582172	537637	996340	470333	701396	566977	668396	638814	1.38924e+06	571998	512362	460970	581186	522956	676725	593227	322694	524394	703243	1.43535e+06
P08697	Alpha-2-antiplasmin (Alpha-2-AP) (Alpha-2-plasmin inhibitor) (Alpha-2-PI) (Serpin F2)	SERPINF2	SERPINF2 AAP PLI	491	3	276152	385366	258703	255765	236019	311089	295242	282198	232172	350841	343695	302835	374839	361395	392375	301424	312469	311622	284044	338647	269781	268729	210614	283929	364274	225424	508673	237344	274155	222543	325453	221340	269762	163567	309891	238423	265459	654956	463048	204999	172446	255359	266713	286332
P08708	40S ribosomal protein S17 (Small ribosomal subunit protein eS17)	RPS17	RPS17 RPS17L	135	4	260987	229647	292151	526322	250103	424784	440692	425615	297998	245941	379450	409062	189880	514977	414178	377508	361305	228170	659053	522487	594599	386397	530721	465734	373090	398007	544177	379988	360588	366057	245137	198490	259928	434744	269622	287941	328804	193829	281826	196866	101966	236761	179814	350776
P08727	Keratin, type I cytoskeletal 19 (Cytokeratin-19) (CK-19) (Keratin-19) (K19)	KRT19	KRT19	400	26	1.30317e+06	363778	486636	357658	475648	895137	467135	520261	520985	708732	621667	440879	265991	1.5459e+06	1.10204e+06	1.23828e+06	795047	309140	461873	273795	497643	532789	386403	501174	447614	294965	611527	475629	451713	315750	1.24875e+06	361791	505701	358632	506064	703487	389948	424327	550940	579456	288257	359668	274317	1.14439e+06
P08729	Keratin, type II cytoskeletal 7 (Cytokeratin-7) (CK-7) (Keratin-7) (K7) (Sarcolectin) (Type-II keratin Kb7)	KRT7	KRT7 SCL	469	12	796681	197736	267030	231882	246626	436080	370302	314426	324984	218269	199903	181863	202755	380976	354048	338653	293931	207354	201456	205758	224329	202708	188821	228897	173169	189018	260855	180797	179201	122313	711397	209257	294161	179681	280926	352823	268008	233511	301244	144159	97787.9	159884	200206	306585
P08754	Guanine nucleotide-binding protein G(k) subunit alpha (G(i) alpha-3)	GNAI3	GNAI3	354	3	14319.7	16469.4	21604.2	18177.8	14178	24772.8	12489.1	20098.6	16911.1	16602.8	24695.3	17013.4	13859.8	36767.2	18604.4	17083.2	21212.6	13041.4	61861.2	31729.4	57672.1	43006.7	27566.1	30933.3	19721.3	23446.7	35519.9	20640.7	26415.4	14258.9	19380.5	14971.8	20306.5	14078.5	16195.5	18940.9	11597.8	14859.4	16895.4	16060.5	8932.57	8810.3	18798.9	22398.6
P08758	Annexin A5 (Anchorin CII) (Annexin V) (Annexin-5) (Calphobindin I) (CBP-I) (Endonexin II) (Lipocortin V) (Placental anticoagulant protein 4) (PP4) (Placental anticoagulant protein I) (PAP-I) (Thromboplastin inhibitor) (Vascular anticoagulant-alpha) (VAC-alpha)	ANXA5	ANXA5 ANX5 ENX2 PP4	320	8	485707	408465	884949	707425	617115	1.11693e+06	616280	664266	461956	781364	976902	755144	402780	1.09481e+06	713864	577279	647616	451753	592961	520805	592781	582025	431462	657072	528656	586402	742435	530852	711758	503867	388595	418960	668145	630793	565710	754997	389352	322702	389290	623420	261363	441954	319077	642732
P08779	Keratin, type I cytoskeletal 16 (Cytokeratin-16) (CK-16) (Keratin-16) (K16)	KRT16	KRT16 KRT16A	473	2	548865	1.03962e+06	805954	673062	546340	647028	884459	990404	752477	756815	779082	855161	1.04623e+06	662123	881919	471319	629722	877312	679872	1.0243e+06	666664	528509	520306	628686	760489	646352	933614	572634	825227	496222	487901	844627	860899	620612	691556	555025	647284	804688	771506	596033	391296	633198	1.07807e+06	553439
P08865	40S ribosomal protein SA (37 kDa laminin receptor precursor) (37LRP) (37/67 kDa laminin receptor) (LRP/LR) (67 kDa laminin receptor) (67LR) (Colon carcinoma laminin-binding protein) (Laminin receptor 1) (LamR) (Laminin-binding protein precursor p40) (LBP/p40) (Multidrug resistance-associated protein MGr1-Ag) (NEM/1CHD4) (Small ribosomal subunit protein uS2)	RPSA	RPSA LAMBR LAMR1	295	8	310870	199247	394975	631737	543237	746465	323782	348837	246422	460246	411707	383499	226718	602121	391122	373453	350313	205941	488792	305530	558642	558981	427475	491474	401796	559396	512793	387454	426227	434979	284569	182617	368740	608472	610144	568062	266851	245465	242406	360999	167680	261591	216158	447572
P09093	Chymotrypsin-like elastase family member 3A (EC 3.4.21.70) (Elastase IIIA) (Elastase-3A) (Protease E)	CELA3A	CELA3A ELA3 ELA3A	270	3	288982	665855	676096	585283	347729	517679	610443	851353	550408	602031	668267	646209	796603	422199	658433	287834	447297	568419	419667	988858	444164	395346	343384	582238	561050	454574	833248	508816	593417	340978	266278	780477	640803	414506	463285	439718	470244	555571	531856	407544	220194	393842	748820	326321
P09104	Gamma-enolase (EC 4.2.1.11) (2-phospho-D-glycerate hydro-lyase) (Enolase 2) (Neural enolase) (Neuron-specific enolase) (NSE)	ENO2	ENO2	434	2	189453	142676	191020	293120	334777	454942	184829	234226	181853	276361	291295	254020	169294	279327	265894	164631	163768	130394	352448	271285	391770	275977	230351	297341	278144	376410	369515	288583	313230	227292	125551	111544	175284	250859	285286	289621	118172	107166	127509	203883	80521.9	147673	130556	171203
P09110	3-ketoacyl-CoA thiolase, peroxisomal (EC 2.3.1.16) (Acetyl-CoA acyltransferase) (Beta-ketothiolase) (Peroxisomal 3-oxoacyl-CoA thiolase)	ACAA1	ACAA1 ACAA PTHIO	424	13	97781.8	69108.7	110007	169060	131354	185895	114807	119245	75912.1	108729	127615	110150	73718.8	174850	116252	106747	106949	81289.7	184625	113724	202340	166638	144276	152405	129843	142016	169340	134478	148594	108104	83657.6	66515.2	115259	147780	155274	148890	91623.3	86856.1	90612.7	86619.4	47155.7	87432.1	71993.4	133929
P09211	Glutathione S-transferase P (EC 2.5.1.18) (GST class-pi) (GSTP1-1)	GSTP1	GSTP1 FAEES3 GST3	210	9	382878	275952	349053	277158	213905	368304	202963	280107	184772	236268	285507	224550	172542	443890	254381	252143	248155	190157	149992	192226	197317	127657	129242	167455	134474	154597	203728	159397	157605	125360	309472	244731	336976	235039	246133	289959	157535	194277	177202	177078	111956	138872	166801	334356
P09234	U1 small nuclear ribonucleoprotein C (U1 snRNP C) (U1-C) (U1C)	SNRPC	SNRPC	159	3	82733.6	74838.6	96018.5	108759	98415.3	124312	76795.9	87747.9	73180.6	111965	113160	88501.9	64680.1	143696	106177	78102.6	73291	69068	105423	95419.7	117062	108167	82532	104935	98311.7	114639	127848	94069	92905.3	92516.1	72000.5	66993.7	84475	98149.4	96844.6	102132	65072.2	97223.8	89128.9	96148.3	43979.1	70698	84352.3	118335
P09237	Matrilysin (EC 3.4.24.23) (Matrin) (Matrix metalloproteinase-7) (MMP-7) (Pump-1 protease) (Uterine metalloproteinase)	MMP7	MMP7 MPSL1 PUMP1	267	2	991010	1.25352e+06	1.09753e+06	1.25124e+06	1.07335e+06	1.50539e+06	2.19932e+06	1.68303e+06	864178	1.01393e+06	1.19351e+06	1.36847e+06	1.12509e+06	1.66344e+06	1.01721e+06	2.00444e+06	932131	1.26821e+06	1.55417e+06	1.69306e+06	1.64215e+06	1.5744e+06	1.34602e+06	2.08453e+06	1.92411e+06	1.60279e+06	2.75551e+06	1.89442e+06	1.81506e+06	1.7716e+06	913541	1.30346e+06	1.68792e+06	1.22708e+06	966758	1.17641e+06	2.11047e+06	1.54704e+06	2.16793e+06	862935	1.16255e+06	738413	1.46414e+06	1.9713e+06
P09327	Villin-1	VIL1	VIL1 VIL	827	4	269120	405307	306741	318487	256630	335918	238093	393650	271171	334524	327797	277689	389048	326532	396268	249440	328362	321350	215075	296864	262929	222249	187080	256086	251257	240642	217262	214409	270531	220931	286287	396278	374052	238449	317396	276180	276407	441683	411148	246647	159308	237051	479741	270036
P09382	Galectin-1 (Gal-1) (14 kDa laminin-binding protein) (HLBP14) (14 kDa lectin) (Beta-galactoside-binding lectin L-14-I) (Galaptin) (HBL) (HPL) (Lactose-binding lectin 1) (Lectin galactoside-binding soluble 1) (Putative MAPK-activating protein PM12) (S-Lac lectin 1)	LGALS1	LGALS1	135	7	554595	926480	1.2633e+06	715883	435638	713902	705601	857928	675141	752641	711422	661712	855439	844836	712290	407329	659338	587366	440358	745391	417687	403252	371969	634260	473301	484137	630929	423634	501061	422375	548387	982987	1.19106e+06	567044	505334	594803	723290	676296	682037	632497	300454	530842	826606	697598
P09417	Dihydropteridine reductase (EC 1.5.1.34) (HDHPR) (Quinoid dihydropteridine reductase) (Short chain dehydrogenase/reductase family 33C member 1)	QDPR	QDPR DHPR SDR33C1	244	3	120992	96889	149832	138977	132312	159756	113331	128551	106180	119755	143446	112691	71842.9	206523	120515	116110	127338	91536.4	127659	105230	140580	119535	98963.9	111360	110125	128085	148405	97782.7	111416	79723.5	105617	85980.4	161011	123171	156098	158537	81114.7	125764	114352	102481	58231.5	82771.6	84756.2	176110
P09429	High mobility group protein B1 (High mobility group protein 1) (HMG-1)	HMGB1	HMGB1 HMG1	215	5	465880	346807	476507	478283	400308	604832	414875	454142	345113	430050	425810	368105	352272	796711	586153	518356	532235	330931	559635	440589	563407	471754	410275	498770	416210	466193	596095	417256	468003	385328	457727	314359	490457	446709	458333	470164	373107	364225	425145	358524	212778	288772	362750	677012
P09467	Fructose-1,6-bisphosphatase 1 (FBPase 1) (EC 3.1.3.11) (D-fructose-1,6-bisphosphate 1-phosphohydrolase 1) (Liver FBPase)	FBP1	FBP1 FBP	338	4	335421	431707	388590	398905	293470	284291	356486	490470	306981	335227	383115	321671	374859	461746	441407	289688	333746	281470	265779	429264	498513	338680	301540	286326	279249	289740	430326	209324	285521	226197	245725	399753	455491	286151	392475	349795	273922	420481	391543	288444	186407	282652	524611	287096
P09493	Tropomyosin alpha-1 chain (Alpha-tropomyosin) (Tropomyosin-1)	TPM1	TPM1 C15orf13 TMSA	284	6	336660	1.37887e+06	1.40684e+06	877164	631016	744516	1.35436e+06	1.47206e+06	882405	1.17672e+06	1.0297e+06	966432	1.93522e+06	552079	1.28569e+06	425730	729615	1.17139e+06	644597	1.74681e+06	659644	542305	575212	1.02832e+06	1.0372e+06	686143	1.51635e+06	789568	987444	675281	320796	1.39027e+06	1.36886e+06	661733	823781	713627	1.08838e+06	1.13452e+06	1.12955e+06	761238	493319	844730	1.67806e+06	511464
P09497	Clathrin light chain B (Lcb)	CLTB	CLTB	229	2	227671	344102	314195	293951	233178	264956	342846	418201	271853	299609	306080	298214	395536	293443	360392	219528	236589	304164	245552	385075	236612	215873	188561	265418	290044	239173	401012	241658	285819	209029	214223	338651	317986	278237	258199	248234	261322	267773	307136	242421	163420	221727	361129	201415
P09525	Annexin A4 (35-beta calcimedin) (Annexin IV) (Annexin-4) (Carbohydrate-binding protein p33/p41) (Chromobindin-4) (Endonexin I) (Lipocortin IV) (P32.5) (PP4-X) (Placental anticoagulant protein II) (PAP-II) (Protein II)	ANXA4	ANXA4 ANX4	319	15	232931	179814	263532	241318	202863	313618	222389	273831	201966	223669	224502	189507	191490	374900	306505	252382	276150	193046	247401	234726	272940	247309	186807	236680	199143	235933	266847	201167	235032	171753	208160	192481	257235	223058	232127	252458	172427	191747	198021	180459	93775	139231	192362	299883
P09543	2',3'-cyclic-nucleotide 3'-phosphodiesterase (CNP) (CNPase) (EC 3.1.4.37)	CNP	CNP	421	8	99204.5	90173.8	125954	145522	119919	165955	157446	186044	127135	129152	154525	143606	95875.4	194446	180928	122834	132996	122189	285990	175659	262402	165105	193083	158284	139665	145884	206536	146438	134610	108211	103986	87772.7	124709	132411	108310	132324	125527	126433	138601	100151	57382.7	107115	89848.1	141904
P09601	Heme oxygenase 1 (HO-1) (EC 1.14.14.18)	HMOX1	HMOX1 HO HO1	288	2	612693	461309	536746	856093	507636	667326	816493	772461	657073	426331	553099	718959	476231	918547	951583	731230	642528	509148	861602	768202	709006	526288	773536	640678	579383	592031	791196	495543	486171	755114	556148	394551	536501	870422	575283	507701	650702	651288	630412	266540	321355	596526	452450	712878
P09619	Platelet-derived growth factor receptor beta (PDGF-R-beta) (PDGFR-beta) (EC 2.7.10.1) (Beta platelet-derived growth factor receptor) (Beta-type platelet-derived growth factor receptor) (CD140 antigen-like family member B) (Platelet-derived growth factor receptor 1) (PDGFR-1) (CD antigen CD140b)	PDGFRB	PDGFRB PDGFR PDGFR1	1106	2	528696	504882	550653	415737	452649	435839	487463	486336	386457	522361	355098	445621	395635	532031	602863	515996	524211	478399	384561	509192	403880	346563	324223	451530	323565	393670	544327	428561	396345	331268	380699	449019	612263	462083	589481	539178	409703	656995	698474	313040	379401	516046	493581	562120
P09622	Dihydrolipoyl dehydrogenase, mitochondrial (EC 1.8.1.4) (Dihydrolipoamide dehydrogenase) (Glycine cleavage system L protein)	DLD	DLD GCSL LAD PHE3	509	5	235872	197503	223520	310930	298428	379845	220219	272607	225596	293173	283595	264300	180925	296953	314831	266855	242051	200922	274975	219745	309901	285893	213089	252171	192882	220702	314639	190738	255512	196841	225511	152298	241023	284617	234276	280789	193075	199026	204421	206703	127586	196874	180092	295570
P09651	Heterogeneous nuclear ribonucleoprotein A1 (hnRNP A1) (Helix-destabilizing protein) (Single-strand RNA-binding protein) (hnRNP core protein A1) [Cleaved into: Heterogeneous nuclear ribonucleoprotein A1, N-terminally processed]	HNRNPA1	HNRNPA1 HNRPA1	372	2	362836	259280	342601	363780	313683	537782	368629	388965	252917	416922	432984	379379	200416	607396	399025	379044	362991	249102	447262	456898	508820	426148	427190	408717	362751	531646	466333	377015	349826	287010	294045	240740	346118	374846	332818	344077	345455	223995	277554	322005	127276	278132	237238	360499
P09661	U2 small nuclear ribonucleoprotein A' (U2 snRNP A')	SNRPA1	SNRPA1	255	5	131453	129701	146970	174287	135482	189207	154047	167763	114533	143518	170501	169406	100847	209699	165882	147095	157425	120073	161824	144153	191446	184495	134782	165490	143718	151446	190146	135520	160733	129349	129040	100290	161200	137289	164398	177066	120201	129029	141484	143513	80186.7	105162	124269	174320
P09668	Pro-cathepsin H [Cleaved into: Cathepsin H mini chain; Cathepsin H (EC 3.4.22.16); Cathepsin H heavy chain; Cathepsin H light chain]	CTSH	CTSH CPSB	335	3	38729.9	43077.5	73571.3	82230.9	76461.8	101941	144694	278895	44635.9	51554.1	53047.7	35964.1	34562.8	49529.5	58573.9	46366.9	83285.8	40427.8	143314	46203.4	190664	146405	118128	119322	106248	142545	147272	125351	135334	120823	35188.4	55166.2	58155.7	53844.1	63360.7	82107.4	50976.2	34423.3	50011.2	63610.9	34614.4	20413.6	77395.7	90596.6
P09669	Cytochrome c oxidase subunit 6C (Cytochrome c oxidase polypeptide VIc)	COX6C	COX6C	75	2	404411	213989	247544	253816	249714	335101	274159	317524	287729	266764	176820	209446	221375	314315	364340	238630	217426	138729	478316	263107	479177	319791	287793	286324	316929	286042	389518	271570	283780	216038	404846	198709	193866	316614	208423	236625	251935	208486	250393	238986	87943.2	124415	194007	184462
P09758	Tumor-associated calcium signal transducer 2 (Cell surface glycoprotein Trop-2) (Membrane component chromosome 1 surface marker 1) (Pancreatic carcinoma marker protein GA733-1)	TACSTD2	TACSTD2 GA733-1 M1S1 TROP2	323	5	106206	80360.5	99885.4	105452	81695.3	123619	94143.8	119749	76672.9	97383	107401	107003	77352.8	193099	127535	112145	101966	74674.6	204449	105681	219037	137703	92593.2	114720	86180.9	100134	111070	97910.2	103802	74476.2	94226.6	72991.3	94036.8	87908.9	100527	101744	60173.6	94890.1	104629	77224.9	40243.9	70057.7	85119.5	108232
P09871	Complement C1s subcomponent (EC 3.4.21.42) (C1 esterase) (Complement component 1 subcomponent s) [Cleaved into: Complement C1s subcomponent heavy chain; Complement C1s subcomponent light chain]	C1S	C1S	688	3	178550	134710	182378	265373	162963	254115	288524	296297	189829	179533	262428	251800	135853	309456	268242	227797	228320	192171	314882	293133	264343	185308	244964	233695	202029	213639	299757	187920	192332	187222	186004	147134	179035	247332	172017	187004	192698	163836	212700	130986	76908.4	156723	136947	223637
P09874	Poly [ADP-ribose] polymerase 1 (PARP-1) (EC 2.4.2.30) (ADP-ribosyltransferase diphtheria toxin-like 1) (ARTD1) (NAD(+) ADP-ribosyltransferase 1) (ADPRT 1) (Poly[ADP-ribose] synthase 1)	PARP1	PARP1 ADPRT PPOL	1014	4	85325.7	75435.6	109316	100557	99159.3	141551	95761.9	99469.6	80128.8	132502	131453	109632	71722.6	148250	105855	92712.9	105724	62362.1	159183	93466.2	153855	157059	124413	172707	102620	135256	145563	113866	129423	100126	84007	54743.5	109139	108068	102956	104050	75510.7	75942.9	82796.4	108820	57063.9	80688.7	82118.4	105182
P09917	Arachidonate 5-lipoxygenase (5-LO) (5-lipoxygenase) (EC 1.13.11.34)	ALOX5	ALOX5 LOG5	674	2	202629	311678	308444	317438	214495	256218	340314	357349	309210	360628	320368	326529	340627	422704	380602	285119	218091	259296	286938	288426	262770	241217	267147	323166	271678	256404	374314	267302	277428	264720	239014	276984	274236	278570	239949	240437	300858	311044	337907	242026	169130	236885	365148	319905
P09936	Ubiquitin carboxyl-terminal hydrolase isozyme L1 (UCH-L1) (EC 3.4.19.12) (EC 6.-.-.-) (Neuron cytoplasmic protein 9.5) (PGP 9.5) (PGP9.5) (Ubiquitin thioesterase L1)	UCHL1	UCHL1	223	3	111917	229154	254729	94437.2	135378	154746	130378	177744	128879	116901	118802	122677	222179	260453	166382	114271	146064	140125	107791	127387	166074	102371	70408.2	109619	150876	105963	130704	148782	98117.4	93235.8	142645	224429	222603	153747	209690	168864	104724	129549	156953	140963	73333.5	149485	230320	210280
P09960	Leukotriene A-4 hydrolase (LTA-4 hydrolase) (EC 3.3.2.6) (Leukotriene A(4) hydrolase)	LTA4H	LTA4H LTA4	611	9	98752.4	66999.9	104313	155034	120210	187010	114618	125170	74136.4	124222	125851	122362	75210.7	175021	127506	110352	109339	78912.5	115173	92523.8	151418	131963	86857.7	89792.3	108229	149341	127714	99832.2	116810	82686.6	89823.3	72759.7	108881	147706	126271	143489	69958.3	90489.4	91003	93705.6	55152.7	83714.1	78433.8	138627
P09972	Fructose-bisphosphate aldolase C (EC 4.1.2.13) (Brain-type aldolase)	ALDOC	ALDOC ALDC	364	4	263096	267010	290043	338119	327599	520431	272204	296476	222369	244651	289326	260880	259480	361695	303593	241957	269266	263305	325107	287390	305773	261849	245467	268631	315973	273356	374007	230453	299436	214365	246493	236800	287767	275246	437197	453883	183018	229609	211619	185782	173647	176973	230073	313099
P0C0L5	Complement C4-B (Basic complement C4) (C3 and PZP-like alpha-2-macroglobulin domain-containing protein 3) [Cleaved into: Complement C4 beta chain; Complement C4-B alpha chain; C4a anaphylatoxin; C4b-B; C4d-B; Complement C4 gamma chain]	C4B	C4B CO4 CPAMD3; C4B_2	1744	2	165280	155552	196838	186880	132321	216389	230474	244891	197366	169589	229969	241327	159625	252998	220319	172065	156339	199913	241201	223472	224841	182214	160746	198949	178074	212648	319604	170871	209879	167241	127231	135354	167161	180115	155321	166577	172082	149820	162829	157861	78750.2	149664	146234	182730
P0C7T5	Ataxin-1-like (Brother of ataxin-1) (Brother of ATXN1)	ATXN1L	ATXN1L BOAT BOAT1	689	3	213606	575508	534496	444940	350134	405362	538247	619056	420733	486774	512937	514464	709292	312109	520810	203782	306548	405993	326902	798444	365539	249144	314400	432879	494845	379515	757342	414462	486424	297947	304247	497078	510691	332862	410324	317080	398464	479254	419579	346766	210025	393633	708514	298333
P0DJI8	Serum amyloid A-1 protein (SAA) [Cleaved into: Amyloid protein A (Amyloid fibril protein AA); Serum amyloid protein A(2-104); Serum amyloid protein A(3-104); Serum amyloid protein A(2-103); Serum amyloid protein A(2-102); Serum amyloid protein A(4-101)]	SAA1	SAA1	122	3	480838	475326	388620	378406	377892	509089	380603	404232	350641	466562	413783	300218	377011	530524	460264	410250	414987	380327	413165	317867	432730	371621	326512	351136	354469	347653	488116	293215	350810	286439	471364	372749	394612	328257	526759	378928	317243	431558	461925	327332	305139	375493	373107	402723
P10155	60 kDa SS-A/Ro ribonucleoprotein (60 kDa Ro protein) (60 kDa ribonucleoprotein Ro) (RoRNP) (Ro 60 kDa autoantigen) (Sjoegren syndrome antigen A2) (Sjoegren syndrome type A antigen) (SS-A) (TROVE domain family member 2)	TROVE2	TROVE2 RO60 SSA2	538	6	120135	179403	196533	190070	160112	235163	229497	168924	110744	177757	201572	225433	111198	266444	170408	153684	177863	121842	238662	141832	256735	239546	170241	205416	160040	208228	289403	169336	179094	159187	108090	83350.4	174710	164039	169865	173661	137891	153927	103042	150717	90619.9	122297	146118	214903
P10253	Lysosomal alpha-glucosidase (EC 3.2.1.20) (Acid maltase) (Aglucosidase alfa) [Cleaved into: 76 kDa lysosomal alpha-glucosidase; 70 kDa lysosomal alpha-glucosidase]	GAA	GAA	952	14	99253.4	106984	135267	139514	110304	171900	136544	157854	124819	194151	181896	173157	113716	191189	139986	112146	119718	94681.6	234910	128900	262064	186334	159916	172608	164876	198642	206188	157502	177180	142910	92328.1	114837	136195	140729	133556	140934	103063	118746	128113	152687	76254.4	120498	117843	137778
P10398	Serine/threonine-protein kinase A-Raf (EC 2.7.11.1) (Proto-oncogene A-Raf) (Proto-oncogene A-Raf-1) (Proto-oncogene Pks)	ARAF	ARAF ARAF1 PKS PKS2	606	3	1.33708e+06	2.15051e+06	2.08063e+06	1.66657e+06	1.36001e+06	1.66744e+06	1.94804e+06	2.01057e+06	1.72627e+06	1.80836e+06	1.90057e+06	1.69001e+06	2.29216e+06	1.66409e+06	1.95913e+06	1.24191e+06	1.37195e+06	1.46868e+06	1.28397e+06	2.36527e+06	1.70746e+06	1.29237e+06	995247	1.58635e+06	1.6095e+06	1.47438e+06	2.27293e+06	1.4409e+06	1.68851e+06	1.21981e+06	1.25098e+06	2.0868e+06	2.23007e+06	1.61822e+06	1.63554e+06	1.57953e+06	1.70649e+06	1.99447e+06	1.98811e+06	1.53451e+06	947733	1.65469e+06	2.55074e+06	1.501e+06
P10515	Dihydrolipoyllysine-residue acetyltransferase component of pyruvate dehydrogenase complex, mitochondrial (EC 2.3.1.12) (70 kDa mitochondrial autoantigen of primary biliary cirrhosis) (PBC) (Dihydrolipoamide acetyltransferase component of pyruvate dehydrogenase complex) (M2 antigen complex 70 kDa subunit) (Pyruvate dehydrogenase complex component E2) (PDC-E2) (PDCE2)	DLAT	DLAT DLTA	647	7	79537.4	52288.4	93031.1	104517	102100	156483	85329.7	99590.1	67185.4	108616	118803	82506.7	53492.9	135998	116729	101483	96139.2	66102.3	146608	77911.4	163219	140391	104709	122672	91021.7	113586	129907	91647	109815	84388.5	77543.6	58354.2	79942.7	90083.9	97414.7	101136	59650	60009.4	76423.1	81720.7	31257.1	56257.1	68483.2	106062
P10586	Receptor-type tyrosine-protein phosphatase F (EC 3.1.3.48) (Leukocyte common antigen related) (LAR)	PTPRF	PTPRF LAR	1907	2	1.25383e+06	1.82486e+06	2.37385e+06	1.83709e+06	1.53432e+06	1.79194e+06	2.24374e+06	2.81305e+06	1.99156e+06	2.03727e+06	2.12548e+06	2.19401e+06	2.67346e+06	1.60825e+06	2.42748e+06	1.09029e+06	1.65135e+06	2.29523e+06	1.52061e+06	2.79748e+06	1.58211e+06	1.27235e+06	1.2364e+06	1.82888e+06	2.07587e+06	1.64393e+06	2.63867e+06	1.87237e+06	1.98627e+06	1.31687e+06	1.03557e+06	2.32629e+06	2.14454e+06	1.61392e+06	1.85322e+06	1.42211e+06	1.75658e+06	2.15288e+06	1.81506e+06	1.39542e+06	924025	1.53074e+06	2.38237e+06	1.31888e+06
P10599	Thioredoxin (Trx) (ATL-derived factor) (ADF) (Surface-associated sulphydryl protein) (SASP)	TXN	TXN TRDX TRX TRX1	105	5	241154	232279	328913	363677	301766	524940	261946	321831	220058	578350	466585	456132	207672	389843	272077	263833	258067	164106	544891	301283	571749	502111	363725	456540	357409	493133	414334	327574	383283	354322	264634	217910	377119	333098	366051	476234	222959	336097	271779	472932	200466	339073	246550	299533
P10606	Cytochrome c oxidase subunit 5B, mitochondrial (Cytochrome c oxidase polypeptide Vb)	COX5B	COX5B	129	5	196751	239732	276889	487364	355085	565476	285935	266535	195085	331107	305232	285365	208540	445174	339093	272947	285086	241338	412307	310028	400943	432821	348328	414294	334054	388945	415806	302832	329280	300084	225778	221148	314508	469108	474736	493647	267036	291166	242499	261431	167908	267561	217587	378948
P10619	Lysosomal protective protein (EC 3.4.16.5) (Carboxypeptidase C) (Carboxypeptidase L) (Cathepsin A) (Protective protein cathepsin A) (PPCA) (Protective protein for beta-galactosidase) [Cleaved into: Lysosomal protective protein 32 kDa chain; Lysosomal protective protein 20 kDa chain]	CTSA	CTSA PPGB	480	2	452838	375806	380632	352401	340985	506924	372525	447011	344047	477899	468074	638950	398738	412940	417787	333533	369600	341517	395506	396740	463289	373646	359398	379520	362160	375993	516608	361963	381685	319896	316385	395430	349564	438335	438474	419610	349343	429275	580956	369158	364314	520070	443411	319536
P10620	Microsomal glutathione S-transferase 1 (Microsomal GST-1) (EC 2.5.1.18) (Microsomal GST-I)	MGST1	MGST1 GST12 MGST	155	5	152436	156946	210881	278887	199698	293250	238059	208979	201166	241311	237028	252924	192608	299548	270633	226007	189706	169590	331102	239264	318352	263638	264330	264442	226367	241982	285597	210412	220420	203973	182395	149658	188278	272725	261929	245987	228306	211626	183425	195967	104586	192294	191598	261233
P10643	Complement component C7	C7	C7	843	2	171167	291820	247872	174993	162711	182891	255600	305107	221810	248240	232236	213913	282450	261493	287817	145115	207237	232866	180858	251600	161121	126088	152476	165884	209389	157625	279850	177086	167808	127043	198342	278750	247396	114354	213957	181647	181316	261294	249811	183353	118577	182828	272352	178833
P10644	cAMP-dependent protein kinase type I-alpha regulatory subunit (Tissue-specific extinguisher 1) (TSE1)	PRKAR1A	PRKAR1A PKR1 PRKAR1 TSE1	381	3	59146	62769.8	80756.1	97340.5	75847.3	168867	86719.8	82148.6	46228.5	93325.5	82786.1	69409.1	67179.4	102449	92313	65692.1	89620.7	51295.8	89133.2	75154	115558	127501	80019.9	112816	64237.6	81431.6	100360	51758.4	67693.7	96908.6	77958.2	68484.6	78033.8	84677.8	120092	114371	90230.8	79900.4	98053.2	58016.5	33355.2	47890.2	112591	132501
P10645	Chromogranin-A (CgA) (Pituitary secretory protein I) (SP-I) [Cleaved into: Vasostatin-1 (Vasostatin I); Vasostatin-2 (Vasostatin II); EA-92; ES-43; Pancreastatin; SS-18; WA-8; WE-14; LF-19; Catestatin (SL21); AL-11; GV-19; GR-44; ER-37; GE-25; Serpinin-RRG; Serpinin; p-Glu serpinin precursor]	CHGA	CHGA	457	6	296197	283386	281126	310092	231808	372328	287133	388546	291093	322208	298346	274219	280631	468984	405751	288261	344625	307966	289404	294812	351168	319347	216963	295566	280662	288217	376851	213608	258702	228394	288243	259866	344773	258097	337016	330249	248405	364458	325260	209816	168798	236713	335463	391272
P10721	Mast/stem cell growth factor receptor Kit (SCFR) (EC 2.7.10.1) (Piebald trait protein) (PBT) (Proto-oncogene c-Kit) (Tyrosine-protein kinase Kit) (p145 c-kit) (v-kit Hardy-Zuckerman 4 feline sarcoma viral oncogene homolog) (CD antigen CD117)	KIT	KIT SCFR	976	2	198630	211550	253780	240458	192994	245152	278176	253116	202196	222761	230446	249109	246560	480405	258126	219210	287011	532718	238739	257816	236981	206126	143644	227334	200966	228979	302546	192612	200189	165692	213865	250882	263719	191068	216168	240714	214177	321670	256766	215692	146251	216236	288913	219220
P10768	S-formylglutathione hydrolase (FGH) (EC 3.1.2.12) (Esterase D) (Methylumbelliferyl-acetate deacetylase) (EC 3.1.1.56)	ESD	ESD	282	8	221995	252608	279070	309078	260876	345399	234264	258471	210033	222387	243567	215971	219486	322507	278825	205583	238532	205126	197444	227638	217348	177654	146696	206208	181081	196375	261296	154577	216698	154096	224899	257200	280989	266607	260824	256467	192211	227330	233008	179955	110486	195147	227343	217070
P10809	60 kDa heat shock protein, mitochondrial (EC 3.6.4.9) (60 kDa chaperonin) (Chaperonin 60) (CPN60) (Heat shock protein 60) (HSP-60) (Hsp60) (HuCHA60) (Mitochondrial matrix protein P1) (P60 lymphocyte protein)	HSPD1	HSPD1 HSP60	573	35	234829	194702	322252	511310	474601	751846	286184	296830	235405	431793	389884	356141	183733	425262	302776	262110	263127	189015	557688	346747	664471	531139	452752	506446	424321	564800	553891	406153	473789	425252	224097	192718	315248	483571	537822	580985	225099	204852	233939	340498	161478	258729	239695	334427
P10909	Clusterin (Aging-associated gene 4 protein) (Apolipoprotein J) (Apo-J) (Complement cytolysis inhibitor) (CLI) (Complement-associated protein SP-40,40) (Ku70-binding protein 1) (NA1/NA2) (Testosterone-repressed prostate message 2) (TRPM-2) [Cleaved into: Clusterin beta chain (ApoJalpha) (Complement cytolysis inhibitor a chain); Clusterin alpha chain (ApoJbeta) (Complement cytolysis inhibitor b cha…	CLU	CLU APOJ CLI KUB1 AAG4	449	19	488786	290877	261382	231527	166139	215639	270897	296481	263830	186911	206591	190752	265978	1.27704e+06	445793	813286	1.10282e+06	854086	177033	219433	186442	169935	137907	204178	173185	163368	237504	172737	170671	132948	467052	280026	308777	195275	193871	184179	217498	243011	296646	157208	102180	172911	286738	1.04268e+06
P10915	Hyaluronan and proteoglycan link protein 1 (Cartilage-linking protein 1) (Cartilage-link protein) (Proteoglycan link protein)	HAPLN1	HAPLN1 CRTL1	354	2	261936	287627	333408	299405	314806	349980	294729	398680	374207	349052	340996	293976	417020	266051	363954	308259	224390	286121	283449	386781	276484	309232	216986	339111	311075	278432	356484	293849	355938	193470	262919	255867	399974	341905	273414	306427	250676	352417	342664	291650	233212	277099	400842	319611
P11021	Endoplasmic reticulum chaperone BiP (EC 3.6.4.10) (78 kDa glucose-regulated protein) (GRP-78) (Binding-immunoglobulin protein) (BiP) (Heat shock protein 70 family protein 5) (HSP70 family protein 5) (Heat shock protein family A member 5) (Immunoglobulin heavy chain-binding protein)	HSPA5	HSPA5 GRP78	654	22	239620	174909	264460	440115	390081	503030	279381	305709	201756	398087	405452	340544	181820	530926	311202	308258	304141	204037	409493	240149	435037	423626	296552	351159	356069	433547	408280	310819	356714	297147	215006	168634	256243	417841	491085	421110	206404	254742	224816	303260	172812	277352	196589	428241
P11047	Laminin subunit gamma-1 (Laminin B2 chain) (Laminin-1 subunit gamma) (Laminin-10 subunit gamma) (Laminin-11 subunit gamma) (Laminin-2 subunit gamma) (Laminin-3 subunit gamma) (Laminin-4 subunit gamma) (Laminin-6 subunit gamma) (Laminin-7 subunit gamma) (Laminin-8 subunit gamma) (Laminin-9 subunit gamma) (S-laminin subunit gamma) (S-LAM gamma)	LAMC1	LAMC1 LAMB2	1609	13	263304	221551	218817	177760	153531	187419	241133	301760	209256	231003	247871	244697	233268	235489	280271	179788	204928	239016	182026	227915	190089	154723	141358	179311	208340	212157	286362	179655	234789	152364	199468	203976	213413	156269	159028	133981	161035	215435	181524	173541	102242	163476	223790	190211
P11117	Lysosomal acid phosphatase (LAP) (EC 3.1.3.2)	ACP2	ACP2	423	2	230366	310288	481703	220602	216695	382068	277700	309661	190041	259483	256199	235126	251961	279816	293687	190670	227929	240671	197480	326299	221829	186459	159558	251031	227787	172460	482616	190147	216905	168426	229191	307473	272069	206446	258550	202245	225488	314252	270175	184040	133742	208015	290015	190704
P11137	Microtubule-associated protein 2 (MAP-2)	MAP2	MAP2	1827	5	342493	353081	444484	349978	269548	488295	361980	381672	268715	562988	515451	293455	216033	498897	377301	439454	380568	227482	492930	359548	591492	476130	409564	416142	415934	395422	485095	328542	440513	333687	367438	252578	324722	450352	309032	327173	254921	335515	348012	297484	288322	367548	319505	327506
P11142	Heat shock cognate 71 kDa protein (Heat shock 70 kDa protein 8) (Lipopolysaccharide-associated protein 1) (LAP-1) (LPS-associated protein 1)	HSPA8	HSPA8 HSC70 HSP73 HSPA10	646	21	356623	365514	516901	666458	636545	859765	394663	457629	322091	592325	567149	466801	345431	745935	458616	413342	442112	304268	617006	391339	724250	614761	452024	516292	511195	636109	652284	480611	567978	473535	352669	340748	477524	664548	688695	643350	302229	333645	339220	469631	242917	360326	315323	582278
P11171	Protein 4.1 (P4.1) (4.1R) (Band 4.1) (EPB4.1)	EPB41	EPB41 E41P	864	3	103193	66919.3	150046	108429	110222	140178	151455	136959	105666	161676	178204	146304	77556.1	191861	124232	126040	143672	100338	128218	103560	169247	164303	121103	127429	125687	142775	178218	116957	107295	106011	113979	75973.7	147835	119435	128949	132665	105411	129255	116503	145450	82860.1	144119	119428	171805
P11172	Uridine 5'-monophosphate synthase (UMP synthase) [Includes: Orotate phosphoribosyltransferase (OPRT) (OPRTase) (EC 2.4.2.10); Orotidine 5'-phosphate decarboxylase (ODC) (EC 4.1.1.23) (OMPdecase)]	UMPS	UMPS OK/SW-cl.21	480	3	279777	221037	312479	582498	291733	441623	510463	459951	332983	246800	361210	440459	187510	627327	454285	407593	375660	264443	655055	544890	566212	366111	581551	489089	393373	392009	556596	381194	355951	405454	244852	214641	280307	504757	297766	311657	346167	242711	294142	150490	121145	276072	189005	395031
P11177	Pyruvate dehydrogenase E1 component subunit beta, mitochondrial (PDHE1-B) (EC 1.2.4.1)	PDHB	PDHB PHE1B	359	7	127334	125555	130303	158588	112536	195060	148213	161857	107355	127884	134890	122523	103150	192146	158404	118151	129821	111969	146475	149953	167820	129242	106574	134368	116310	133149	170134	109065	121118	110022	127783	109173	145252	146344	156903	145312	98536.7	142521	125532	104989	83359.5	107388	137859	168552
P11182	Lipoamide acyltransferase component of branched-chain alpha-keto acid dehydrogenase complex, mitochondrial (EC 2.3.1.168) (52 kDa mitochondrial autoantigen of primary biliary cirrhosis) (Branched chain 2-oxo-acid dehydrogenase complex component E2) (BCOADC-E2) (Branched-chain alpha-keto acid dehydrogenase complex component E2) (BCKAD-E2) (BCKADE2) (Dihydrolipoamide acetyltransferase component of …	DBT	DBT BCATE2	482	10	112569	130947	154959	175116	150451	178993	127564	145739	105562	170486	160911	137250	109824	191997	137954	113689	103783	92626.1	221829	149304	270631	192980	150410	157002	142429	191060	198999	169143	151813	141425	116623	92599.9	127733	156125	162672	158940	117989	87031.8	137443	136286	62959.6	109681	117299	139976
P11215	Integrin alpha-M (CD11 antigen-like family member B) (CR-3 alpha chain) (Cell surface glycoprotein MAC-1 subunit alpha) (Leukocyte adhesion receptor MO1) (Neutrophil adherence receptor) (CD antigen CD11b)	ITGAM	ITGAM CD11B CR3A	1152	2	441209	514521	457844	342585	316923	405444	405035	529438	352711	407995	411395	364598	533333	579466	567677	366858	488697	522115	373373	488813	388824	327176	316893	398224	425488	395682	584681	335371	387256	295723	374418	389911	426132	355793	376288	472012	303730	449343	486937	362029	311035	359948	605890	427578
P11216	Glycogen phosphorylase, brain form (EC 2.4.1.1)	PYGB	PYGB	843	10	162141	143531	262703	128711	118481	186495	199786	245868	166521	160686	187366	169031	182000	259911	214591	143750	170739	149027	126343	156880	136429	143383	106531	131559	120726	143220	196835	119415	146793	109008	141782	152277	238603	126355	154962	148615	137108	164228	156569	109855	78591.6	113618	179748	198747
P11217	Glycogen phosphorylase, muscle form (EC 2.4.1.1) (Myophosphorylase)	PYGM	PYGM	842	2	187842	123842	221233	116987	118903	153904	167074	209370	201681	170816	203335	174256	144975	257347	205265	136536	203451	128607	203085	143397	210165	185585	156120	163767	144042	164809	186862	95405.6	142484	133833	166040	139939	205667	114845	139146	181768	112490	154536	119895	150812	89763.7	123673	151385	238730
P11234	Ras-related protein Ral-B	RALB	RALB	206	2	143757	134077	208356	189349	159770	210809	194724	377838	156324	233469	218629	174926	107093	244018	202498	164205	193415	207433	192740	172527	195459	183646	123897	192827	155226	180064	217633	165656	172547	122220	131279	189141	173092	178198	196239	236477	152881	184135	167289	163903	91263.9	172143	162147	195867
P11274	Breakpoint cluster region protein (EC 2.7.11.1) (Renal carcinoma antigen NY-REN-26)	BCR	BCR BCR1 D22S11	1271	3	649292	532822	574974	439535	412677	548578	449638	608603	473681	584724	566723	439751	442405	659925	558853	568119	777977	546678	476877	607209	469872	519142	399782	507378	443250	490839	572668	457122	461597	366189	596348	628366	524628	448920	436437	448547	419610	613985	578874	440893	253986	355492	420414	690870
P11277	Spectrin beta chain, erythrocytic (Beta-I spectrin)	SPTB	SPTB SPTB1	2137	3	749852	1.15251e+06	997763	792891	705612	839490	1.04068e+06	1.24166e+06	903859	971230	970711	977006	1.13633e+06	973739	1.14995e+06	722827	813736	980769	765573	1.2056e+06	837222	638177	582299	862717	859009	766630	1.24089e+06	793451	879338	647520	795096	1.11784e+06	1.06649e+06	807185	808032	734938	773212	1.09029e+06	972873	731093	519070	807636	1.32554e+06	754918
P11279	Lysosome-associated membrane glycoprotein 1 (LAMP-1) (Lysosome-associated membrane protein 1) (CD107 antigen-like family member A) (CD antigen CD107a)	LAMP1	LAMP1	417	6	204280	105959	227079	183427	154581	311116	221086	186985	173825	187119	242697	227728	144113	312006	231914	124798	249601	115719	417887	240413	515857	274406	300933	265835	198788	211084	318968	270428	285990	177494	190446	112932	203224	177886	190733	218015	116549	124854	165903	188592	82154.1	125952	95814	211205
P11310	Medium-chain specific acyl-CoA dehydrogenase, mitochondrial (MCAD) (EC 1.3.8.7)	ACADM	ACADM	421	3	217487	184791	214847	350656	226191	272984	313631	285813	236286	211652	245897	292676	170644	362547	319665	254988	243874	192666	316692	291039	292663	214567	288920	261722	233810	250121	313092	200175	222173	259596	212114	154942	204885	329074	243261	218982	234974	232496	253984	166653	121810	236449	174754	271027
P11387	DNA topoisomerase 1 (EC 5.99.1.2) (DNA topoisomerase I)	TOP1	TOP1	765	5	479416	371842	456299	373761	360050	401172	390247	428188	367029	404110	392603	372546	402942	727422	458540	490095	487490	416120	335911	366237	329604	318183	287727	332000	342154	299836	450651	255941	357468	270951	418799	379953	476446	369895	459338	360933	315961	398019	474562	279685	208579	298785	418138	602590
P11388	DNA topoisomerase 2-alpha (EC 5.99.1.3) (DNA topoisomerase II, alpha isozyme)	TOP2A	TOP2A TOP2	1531	2	457612	556980	449427	262789	228754	288322	442941	463052	374293	368307	377514	352733	466996	419533	460614	332391	382693	400101	281828	447111	295251	302208	200566	261428	282101	231818	417675	238462	264213	214439	449019	511422	542283	229254	245916	235531	399842	470098	534105	286601	191785	318379	483980	406843
P11413	Glucose-6-phosphate 1-dehydrogenase (G6PD) (EC 1.1.1.49)	G6PD	G6PD	515	5	57615.7	40090.1	84644.5	67723.5	50357.5	108755	69238.7	83565.7	46022.3	54974.8	83509.9	55359.3	43374	121177	72649.4	62787.2	66025.5	39309.5	120278	60414.6	134348	91816	87131.3	83704.8	66344	88517.3	106884	78665.1	93453.5	71126.4	51592.5	31696.2	70008.4	66370.8	71612.8	79541.6	51251.8	44373.2	51280.6	52068.6	25731	73426.5	56005.8	86785.9
P11498	Pyruvate carboxylase, mitochondrial (EC 6.4.1.1) (Pyruvic carboxylase) (PCB)	PC	PC	1178	6	164624	180272	189647	174418	164424	196478	200864	307455	169141	186011	222182	226513	269186	217764	251348	162470	184654	197134	219826	277601	212330	200854	160959	214528	200496	188626	286888	193821	200211	156010	160422	170877	201329	168944	176327	161172	165610	190813	176121	142006	77090.9	147477	274485	188321
P11532	Dystrophin	DMD	DMD	3685	2	443163	801985	875695	654996	579409	711136	686181	1.01988e+06	744258	567727	724551	908662	1.24596e+06	440403	981380	381532	462495	708567	544403	1.12944e+06	475378	407798	381615	681700	711138	557197	1.13887e+06	631526	761682	485777	388299	740294	688463	498990	431350	418727	550017	770401	581211	571915	382572	634775	1.29741e+06	422472
P11586	C-1-tetrahydrofolate synthase, cytoplasmic (C1-THF synthase) [Cleaved into: C-1-tetrahydrofolate synthase, cytoplasmic, N-terminally processed] [Includes: Methylenetetrahydrofolate dehydrogenase (EC 1.5.1.5); Methenyltetrahydrofolate cyclohydrolase (EC 3.5.4.9); Formyltetrahydrofolate synthetase (EC 6.3.4.3)]	MTHFD1	MTHFD1 MTHFC MTHFD	935	8	348192	204528	321220	362114	306158	454253	297840	321006	252714	398540	363988	329175	206935	472292	375521	319923	298845	183276	478348	296804	529324	438708	356444	425875	325234	463911	429769	346023	380499	401684	336727	212183	354622	388632	392444	395895	250839	274549	315149	310580	177975	268509	227108	385372
P11678	Eosinophil peroxidase (EPO) (EC 1.11.1.7) [Cleaved into: Eosinophil peroxidase light chain; Eosinophil peroxidase heavy chain]	EPX	EPX EPER EPO EPP	715	3	247267	182280	234977	234649	235281	343888	225981	308206	242604	230081	255529	234590	220021	334453	239557	210035	227688	180326	253692	223862	299846	244003	211443	222785	218636	227676	313510	205467	241117	195231	179310	183776	280553	241023	294146	235689	188374	224883	241572	172193	94338	157664	199795	249379
P11717	Cation-independent mannose-6-phosphate receptor (CI Man-6-P receptor) (CI-MPR) (M6PR) (300 kDa mannose 6-phosphate receptor) (MPR 300) (Insulin-like growth factor 2 receptor) (Insulin-like growth factor II receptor) (IGF-II receptor) (M6P/IGF2 receptor) (M6P/IGF2R) (CD antigen CD222)	IGF2R	IGF2R MPRI	2491	4	879904	1.48668e+06	1.17406e+06	911754	756632	931176	1.33857e+06	1.65301e+06	1.23461e+06	1.32911e+06	1.3455e+06	1.32648e+06	1.55826e+06	910394	1.53992e+06	713855	916045	1.2397e+06	817711	1.49636e+06	864750	602329	606923	1.07054e+06	1.16233e+06	1.01818e+06	1.59998e+06	979042	1.05587e+06	762051	860306	1.40865e+06	1.24768e+06	912014	1.01196e+06	751904	902848	1.23775e+06	1.18868e+06	940002	631824	987978	1.53739e+06	717724
P11766	Alcohol dehydrogenase class-3 (EC 1.1.1.1) (Alcohol dehydrogenase 5) (Alcohol dehydrogenase class chi chain) (Alcohol dehydrogenase class-III) (Glutathione-dependent formaldehyde dehydrogenase) (FALDH) (FDH) (GSH-FDH) (EC 1.1.1.-) (S-(hydroxymethyl)glutathione dehydrogenase) (EC 1.1.1.284)	ADH5	ADH5 ADHX FDH	374	13	222692	230876	274784	235240	191643	281715	261153	324060	206288	277469	314392	282532	269446	394639	302390	243872	264076	210596	310980	302007	339923	283341	214213	295444	319545	320712	421163	287679	280838	195819	184462	222065	243018	212803	220229	221869	187918	222599	201676	199765	129472	180005	237066	286773
P11802	Cyclin-dependent kinase 4 (EC 2.7.11.22) (Cell division protein kinase 4) (PSK-J3)	CDK4	CDK4	303	3	12129.8	9220.58	19689.4	10213.8	12006.1	14706.5	11307.3	14723.8	10442.4	12036.3	11150.2	13376.1	9765.46	13545	15840.4	15986.8	14753.1	8786.94	19826.1	17359.5	27937.6	15328	15869.7	21667.1	9223.8	14564	13386.1	18830.1	20000.7	14666.6	9045.06	8315.96	15755.5	12701.4	12006.8	13118.8	11038.9	5440.89	14037.5	10483.2	4854.76	11387.1	9974.19	13690.4
P11908	Ribose-phosphate pyrophosphokinase 2 (EC 2.7.6.1) (PPRibP) (Phosphoribosyl pyrophosphate synthase II) (PRS-II)	PRPS2	PRPS2	318	2	185684	407479	368604	272858	224832	254099	396638	469470	316970	347720	351282	310282	435485	299024	366395	248371	243086	326111	250234	444340	272340	283137	207972	303891	302567	265237	475613	263912	313477	223804	146380	361299	369710	256090	293763	235143	282736	363489	329761	239563	153235	272585	429364	225291
P11940	Polyadenylate-binding protein 1 (PABP-1) (Poly(A)-binding protein 1)	PABPC1	PABPC1 PAB1 PABP1 PABPC2	636	3	206603	259251	188718	202620	213072	246601	185670	218752	158028	195990	187260	179454	214702	267790	337126	177627	212352	291239	150721	182577	190058	174443	135783	176278	158366	167040	275230	164744	159509	127119	200619	217548	207018	160380	225760	192538	166113	222168	217640	137285	106161	157136	186725	213206
P12004	Proliferating cell nuclear antigen (PCNA) (Cyclin)	PCNA	PCNA	261	3	197253	201390	216741	227890	190175	265203	121750	251392	172439	232641	180022	213293	162372	239216	293223	201855	214882	200160	257590	245225	294927	256832	198506	267571	139700	236566	149989	195550	228319	99738.8	210483	233148	300816	212068	221260	214891	162804	192281	241249	155880	77534.6	108634	154528	261518
P12036	Neurofilament heavy polypeptide (NF-H) (200 kDa neurofilament protein) (Neurofilament triplet H protein)	NEFH	NEFH KIAA0845 NFH	1026	3	77263.3	60580	82982	88650.1	79114.6	124352	93792.4	108184	66254.4	86670.9	81654.8	77196.2	60644.5	198449	104006	89528	113761	80199.8	81152.6	96831.8	99080.9	78400.5	70559.8	93780.7	65640.3	92962.3	87810.1	75938.2	79409	57304.9	79562	69869.8	81706	78751.6	72433.3	75287	64174.2	56565.1	79566.6	63907.3	30499.1	62685.2	88411.1	130987
P12081	Histidine--tRNA ligase, cytoplasmic (EC 6.1.1.21) (Histidyl-tRNA synthetase) (HisRS)	HARS	HARS HRS	509	3	126986	184321	210547	148977	129164	172480	226828	263121	165755	214798	226771	186416	257352	254278	245346	166529	203925	176960	157727	204996	166351	179143	131458	166087	204130	133107	249299	141900	183601	127395	142330	199781	335069	191834	205749	177838	170578	198536	195606	132956	95371.9	165743	253480	234212
P12109	Collagen alpha-1(VI) chain	COL6A1	COL6A1	1028	20	356392	533859	376013	255316	219430	241747	679215	1.01965e+06	712443	881601	937814	938287	668994	480407	974699	383974	513220	749957	442579	618303	472298	212246	223409	305587	469247	548617	744115	433625	444114	270764	339708	522727	390785	223045	285055	226215	436326	666967	603867	581123	364073	589505	657043	369848
P12110	Collagen alpha-2(VI) chain	COL6A2	COL6A2	1019	12	357863	601385	459484	299586	252653	326175	784831	1.20006e+06	822008	1.02675e+06	1.18911e+06	1.14584e+06	716378	559277	1.11293e+06	456427	662131	890910	565335	795690	610295	268864	270177	387994	583226	677674	950823	546443	572501	326010	336433	661149	445425	264273	317126	283213	552875	841240	810382	736854	447553	789602	753514	453752
P12111	Collagen alpha-3(VI) chain	COL6A3	COL6A3	3177	61	734588	729368	535996	349843	361990	411862	962733	1.34561e+06	1.09525e+06	1.27647e+06	1.27285e+06	1.26001e+06	970654	623565	1.18658e+06	536441	694762	892456	583177	845576	612604	308092	314386	440949	629032	709518	954550	550895	603247	372590	685856	742446	534285	343261	418955	338737	665773	877081	978860	899299	467623	833276	1.0037e+06	484770
P12235	ADP/ATP translocase 1 (ADP,ATP carrier protein 1) (ADP,ATP carrier protein, heart/skeletal muscle isoform T1) (Adenine nucleotide translocator 1) (ANT 1) (Solute carrier family 25 member 4)	SLC25A4	SLC25A4 ANT1	298	2	76162.7	85408.8	123171	135324	115751	108827	135498	169673	85244.2	126665	113912	108946	76418	173196	134845	84576.3	90578.3	80992	193511	121147	204254	157925	139825	140234	119478	114668	164545	125266	137165	82867	80296.1	76194.4	127356	140541	145432	129508	72907.1	108158	98236.5	117122	68755.2	82714.5	130376	145048
P12236	ADP/ATP translocase 3 (ADP,ATP carrier protein 3) (ADP,ATP carrier protein, isoform T2) (ANT 2) (Adenine nucleotide translocator 3) (ANT 3) (Solute carrier family 25 member 6) [Cleaved into: ADP/ATP translocase 3, N-terminally processed]	SLC25A6	SLC25A6 ANT3 CDABP0051	298	2	136995	108244	148886	175947	158712	242220	139080	130304	93629.3	132820	165857	101259	82156.2	201957	149934	117864	100444	74348.5	310152	143058	369518	233110	199070	188454	163337	214768	229172	164649	175325	145223	116718	81317.7	153036	144208	162610	194794	84392.7	84091.9	129492	87482.4	46192.2	95021.6	83928.4	163146
P12259	Coagulation factor V (Activated protein C cofactor) (Proaccelerin, labile factor) [Cleaved into: Coagulation factor V heavy chain; Coagulation factor V light chain]	F5	F5	2224	5	83579.2	80592.7	64128.9	139962	118467	83187.3	119490	172733	72470.4	331173	346051	181524	87354.1	111410	113210	121346	110926	64838.6	115719	78891.9	82215.8	80053.2	151794	70414.3	86935.5	91174.7	92152.9	104932	102824	85380.2	72505.9	108632	151232	104421	133426	122166	61572.4	77649.4	75768.8	320502	224247	180832	116848	100674
P12268	Inosine-5'-monophosphate dehydrogenase 2 (IMP dehydrogenase 2) (IMPD 2) (IMPDH 2) (EC 1.1.1.205) (IMPDH-II)	IMPDH2	IMPDH2 IMPD2	514	9	121797	121867	144600	266938	237128	318114	108774	165083	99705.8	162376	199150	213764	104024	196454	158992	135182	136247	107795	148322	117119	174377	171716	120371	145701	128805	176627	154623	130378	136218	106455	101342	84468.1	115794	236142	271469	258836	96376.2	114707	100694	134076	83383.8	93698.3	89647.4	186810
P12270	Nucleoprotein TPR (Megator) (NPC-associated intranuclear protein) (Translocated promoter region protein)	TPR	TPR	2363	8	126641	122113	189708	197286	161076	234398	185629	226340	137661	234117	279440	212123	149461	266889	160543	141763	162231	115549	235762	157624	278351	239756	190124	204537	176965	214570	236787	177818	204035	164086	133919	150176	239615	168446	200723	210985	165915	203996	180011	199629	132911	182988	189315	243303
P12277	Creatine kinase B-type (EC 2.7.3.2) (Brain creatine kinase) (B-CK) (Creatine kinase B chain) (Creatine phosphokinase B-type) (CPK-B)	CKB	CKB CKBB	381	23	308154	516734	757534	735149	541420	1.02983e+06	385447	573758	316354	684907	616874	471579	380367	391207	324781	220938	254762	234349	384300	412355	470055	327425	284236	371351	292027	376540	427078	290236	324814	253273	268828	479525	693797	642106	642883	880823	300393	420116	328913	522966	254266	342215	359051	325656
P12429	Annexin A3 (35-alpha calcimedin) (Annexin III) (Annexin-3) (Inositol 1,2-cyclic phosphate 2-phosphohydrolase) (Lipocortin III) (Placental anticoagulant protein III) (PAP-III)	ANXA3	ANXA3 ANX3	323	16	142380	129319	230187	424812	346185	556164	177263	182397	129974	282058	329912	215010	124139	265856	139235	148562	164482	111043	378061	199057	403424	322262	276965	325572	291245	319367	360856	269727	379515	264910	131594	101242	220221	398097	411220	458001	132854	149754	141939	215548	122159	162856	118885	214454
P12532	Creatine kinase U-type, mitochondrial (EC 2.7.3.2) (Acidic-type mitochondrial creatine kinase) (Mia-CK) (Ubiquitous mitochondrial creatine kinase) (U-MtCK)	CKMT1A	CKMT1A CKMT; CKMT1B CKMT	417	4	173780	157524	180550	157873	169728	153748	144853	176984	137774	169640	171276	143409	154278	234391	206260	141257	149111	127342	174027	147056	186909	149500	121410	178275	163472	167454	214163	148209	180329	144040	137832	150449	166058	136172	168489	165223	142440	164480	166978	133863	95766.4	135279	173437	168959
P12694	2-oxoisovalerate dehydrogenase subunit alpha, mitochondrial (EC 1.2.4.4) (Branched-chain alpha-keto acid dehydrogenase E1 component alpha chain) (BCKDE1A) (BCKDH E1-alpha)	BCKDHA	BCKDHA	445	4	80466.9	85497.6	118548	131837	113439	140943	104158	115941	107847	130495	127526	104830	86303.5	146484	131464	92868.2	88933.7	86985.7	120096	86360.8	138586	105788	84652.2	105227	90411.9	113255	122992	75028.3	97890.8	82137.2	120540	79459.9	94731.8	117836	128564	126222	72787.1	85726.7	92422.2	89994.4	49284	54570	88137.7	96874.9
P12814	Alpha-actinin-1 (Alpha-actinin cytoskeletal isoform) (F-actin cross-linking protein) (Non-muscle alpha-actinin-1)	ACTN1	ACTN1	892	38	338099	648999	591616	312914	284085	348726	582426	737090	525579	491590	520120	487407	672056	385358	650470	278509	361796	515163	396567	683355	363514	256329	257882	386347	431055	368755	641740	382887	451909	285311	312418	640155	566877	281006	339828	289234	417195	545536	485727	337826	216351	353271	652776	333474
P12821	Angiotensin-converting enzyme (ACE) (EC 3.2.1.-) (EC 3.4.15.1) (Dipeptidyl carboxypeptidase I) (Kininase II) (CD antigen CD143) [Cleaved into: Angiotensin-converting enzyme, soluble form]	ACE	ACE DCP DCP1	1306	3	289648	307579	326998	296363	314989	537705	249176	377676	220608	279785	514181	470692	293657	545553	535082	282698	248128	220703	385109	372849	534152	453401	246304	340125	323510	383747	467434	299817	292582	235838	207764	269949	293491	360567	391384	434591	251587	325123	334203	325935	175983	283392	289674	373073
P12829	Myosin light chain 4 (Myosin light chain 1, embryonic muscle/atrial isoform) (Myosin light chain alkali GT-1 isoform)	MYL4	MYL4 MLC1 PRO1957	197	2	2.03872e+06	2.27428e+06	2.09943e+06	1.85521e+06	1.68442e+06	1.68985e+06	2.21622e+06	2.74331e+06	2.04413e+06	1.97428e+06	1.96715e+06	1.85766e+06	2.56382e+06	2.29931e+06	2.48524e+06	1.79536e+06	2.24161e+06	2.16762e+06	1.13454e+06	2.19464e+06	1.10901e+06	1.26445e+06	1.49707e+06	1.6318e+06	1.55764e+06	1.43481e+06	2.19053e+06	1.43472e+06	1.42518e+06	1.19042e+06	2.10963e+06	2.32394e+06	2.29012e+06	1.46765e+06	1.79831e+06	1.6894e+06	1.91376e+06	2.51302e+06	2.52012e+06	1.60469e+06	1.00443e+06	1.69347e+06	2.69529e+06	2.1288e+06
P12830	Cadherin-1 (CAM 120/80) (Epithelial cadherin) (E-cadherin) (Uvomorulin) (CD antigen CD324) [Cleaved into: E-Cad/CTF1; E-Cad/CTF2; E-Cad/CTF3]	CDH1	CDH1 CDHE UVO	882	8	44130.2	44689.4	64551.8	81434.6	56583.6	98786	49185.6	63419.4	40294.3	64520.2	61441	55455.1	42612.5	88458.1	71331.5	38723.4	49620	50209.5	105242	59267.2	128784	91886.5	66702.6	67947.1	57804.9	76528.7	79274.4	57133.1	66443.2	44370.8	34748.4	45121	67120.2	74651.2	70771.6	74138.9	37414.4	42034.5	45446.1	39115.7	22955	31197.7	42140.5	66947.1
P12883	Myosin-7 (Myosin heavy chain 7) (Myosin heavy chain slow isoform) (MyHC-slow) (Myosin heavy chain, cardiac muscle beta isoform) (MyHC-beta)	MYH7	MYH7 MYHCB	1935	2	320617	285240	362055	407592	328537	488054	353853	441851	291994	409821	423111	387502	269504	497782	365802	319406	335338	379078	422626	383018	441329	349752	249976	367883	339464	410219	453499	343759	392583	278850	264155	245578	308145	335631	309739	379857	276657	234315	306934	304647	159120	275070	276143	420730
P12931	Proto-oncogene tyrosine-protein kinase Src (EC 2.7.10.2) (Proto-oncogene c-Src) (pp60c-src) (p60-Src)	SRC	SRC SRC1	536	2	433534	338600	318917	328219	223006	318221	414149	432118	344023	295983	346463	342193	265366	539486	453478	413398	424515	414340	355683	415006	325761	257880	310468	323809	309471	276371	420912	281476	274601	262287	393111	326165	318409	325081	251246	269224	318552	326439	375211	212988	143540	282009	294247	457445
P12955	Xaa-Pro dipeptidase (X-Pro dipeptidase) (EC 3.4.13.9) (Imidodipeptidase) (Peptidase D) (Proline dipeptidase) (Prolidase)	PEPD	PEPD PRD	493	2	125229	151870	185354	245931	119662	313727	189355	203814	121883	217812	142125	192883	123819	268370	144259	130572	198387	121606	210182	166276	231254	179439	163016	218439	170662	201612	243723	147070	191676	127701	129084	131020	167054	177833	176996	156229	147392	162311	142547	137693	90906.2	141900	120779	220780
P12956	X-ray repair cross-complementing protein 6 (EC 3.6.4.-) (EC 4.2.99.-) (5'-deoxyribose-5-phosphate lyase Ku70) (5'-dRP lyase Ku70) (70 kDa subunit of Ku antigen) (ATP-dependent DNA helicase 2 subunit 1) (ATP-dependent DNA helicase II 70 kDa subunit) (CTC box-binding factor 75 kDa subunit) (CTC75) (CTCBF) (DNA repair protein XRCC6) (Lupus Ku autoantigen protein p70) (Ku70) (Thyroid-lupus autoantige…	XRCC6	XRCC6 G22P1	609	17	154614	106061	174661	213714	174347	295680	171245	176584	131545	173649	185753	161630	102287	294060	200396	169826	175797	104937	280750	175626	315936	261641	197456	212357	175725	242864	267205	191796	207027	168709	138912	102335	155340	197630	191568	213816	104880	113856	134912	143186	70435.3	117200	108104	210665
P13010	X-ray repair cross-complementing protein 5 (EC 3.6.4.-) (86 kDa subunit of Ku antigen) (ATP-dependent DNA helicase 2 subunit 2) (ATP-dependent DNA helicase II 80 kDa subunit) (CTC box-binding factor 85 kDa subunit) (CTC85) (CTCBF) (DNA repair protein XRCC5) (Ku80) (Ku86) (Lupus Ku autoantigen protein p86) (Nuclear factor IV) (Thyroid-lupus autoantigen) (TLAA) (X-ray repair complementing defective…	XRCC5	XRCC5 G22P2	732	12	167052	96152.3	162984	228410	204190	300383	154827	153914	113370	165490	190745	159366	120544	303291	189310	179066	171522	124429	261733	149903	287342	245865	177328	191746	170561	222595	237052	176302	199736	147995	139765	96594.3	154401	225027	216588	237031	134535	116109	127684	123113	71888.7	104118	103229	214319
P13073	Cytochrome c oxidase subunit 4 isoform 1, mitochondrial (Cytochrome c oxidase polypeptide IV) (Cytochrome c oxidase subunit IV isoform 1) (COX IV-1)	COX4I1	COX4I1 COX4	169	5	322283	204168	273276	348882	328260	457563	249699	236221	213325	308820	293144	277284	296484	379733	323963	270852	242294	178128	403840	301780	378596	421060	316969	362353	318381	351555	362256	295752	315542	307309	303185	171065	228422	338211	375654	374574	185832	341045	186328	252110	123365	203159	190275	287285
P13473	Lysosome-associated membrane glycoprotein 2 (LAMP-2) (Lysosome-associated membrane protein 2) (CD107 antigen-like family member B) (LGP-96) (CD antigen CD107b)	LAMP2	LAMP2	410	4	62827.5	51554.1	257549	142874	98052	279973	133208	132282	80297.6	154051	190746	166605	49718	170432	69915.4	90243.9	100383	54269.6	731003	204957	913774	531187	427922	357079	338349	314918	561861	428483	452554	275033	57394.2	50086.9	194304	104983	97472	217388	91712.6	72730.3	99334.8	129506	66594.7	114870	43961.5	114447
P13489	Ribonuclease inhibitor (Placental ribonuclease inhibitor) (Placental RNase inhibitor) (Ribonuclease/angiogenin inhibitor 1) (RAI)	RNH1	RNH1 PRI RNH	461	6	351256	344384	395878	384122	295251	445300	358591	412912	327954	404801	413825	340474	332155	486061	447964	314575	380784	304836	344025	360670	364883	361609	280772	344283	304609	366844	451148	303345	366136	265163	337606	269334	405577	363168	422896	381457	297484	364486	359877	282840	200572	287528	337988	445831
P13611	Versican core protein (Chondroitin sulfate proteoglycan core protein 2) (Chondroitin sulfate proteoglycan 2) (Glial hyaluronate-binding protein) (GHAP) (Large fibroblast proteoglycan) (PG-M)	VCAN	VCAN CSPG2	3396	4	141139	201970	194520	229637	125029	158750	134568	152564	119276	152145	127731	135468	168606	279547	177089	146286	146273	144675	222140	138239	151752	149151	125404	199041	166806	200649	244613	129235	208420	135588	141723	274794	237731	172843	153916	181663	100116	148510	89835.6	107292	62528.7	100845	122128	187475
P13639	Elongation factor 2 (EF-2)	EEF2	EEF2 EF2	858	21	317077	205913	339281	557915	519526	700365	319041	346624	247769	384758	395516	338243	207367	555541	374399	329031	339432	218955	610613	353294	668124	575353	427459	470738	410961	522308	544953	421941	464143	348072	317622	204227	374068	532822	617984	608902	238062	266133	293194	279323	175244	252669	232579	442990
P13645	Keratin, type I cytoskeletal 10 (Cytokeratin-10) (CK-10) (Keratin-10) (K10)	KRT10	KRT10 KPP	584	6	165578	121752	127747	102911	108493	147310	130195	148792	114114	129656	125720	103210	106545	234787	175617	172386	182674	106043	95590.3	93415.4	97439.7	94053.5	68662.9	130175	96589.2	92576.3	129200	93113.2	99427.2	72196.2	175202	113837	124369	107115	125892	131503	112628	104833	115692	99130.4	59769.1	79069.5	117783	201589
P13646	Keratin, type I cytoskeletal 13 (Cytokeratin-13) (CK-13) (Keratin-13) (K13)	KRT13	KRT13	458	6	342640	75410.9	124921	110993	71452	121705	125411	105205	101127	106488	119101	170586	92023.5	179112	170800	198728	112369	105924	62477.6	102241	98970.2	117711	78666.4	106820	103452	83227.6	134763	94598.2	109279	84458.8	300003	84905.4	125109	109535	200668	157198	109971	128692	111608	93293.9	61378.3	114174	125767	190102
P13647	Keratin, type II cytoskeletal 5 (58 kDa cytokeratin) (Cytokeratin-5) (CK-5) (Keratin-5) (K5) (Type-II keratin Kb5)	KRT5	KRT5	590	20	676224	293074	398689	233812	279267	529555	337373	321989	326498	235788	236530	165644	272102	1.17934e+06	741595	746745	566201	210501	203235	226570	216699	196980	165343	269938	183760	236498	292024	222881	183793	163616	591083	291606	359244	249274	315935	372076	266597	282953	325661	211271	119840	172591	224616	824868
P13667	Protein disulfide-isomerase A4 (EC 5.3.4.1) (Endoplasmic reticulum resident protein 70) (ER protein 70) (ERp70) (Endoplasmic reticulum resident protein 72) (ER protein 72) (ERp-72) (ERp72)	PDIA4	PDIA4 ERP70 ERP72	645	21	166719	146839	220373	356019	332679	424166	194653	216383	157989	257261	259672	237901	145900	313873	223080	198481	192937	148688	299313	199789	315148	306360	237755	262884	237300	292663	270938	204806	254345	253249	173114	134190	217102	349135	367266	313653	155021	186348	207671	203295	115320	184647	169923	229769
P13671	Complement component C6	C6	C6	934	3	331096	226370	344651	350667	292280	478857	412170	418975	325146	432315	457575	463053	343106	502225	372944	352756	342334	267544	421544	373041	395925	324510	344747	355059	400431	369027	478082	328433	336169	310411	268946	226657	355210	364608	414100	342630	280914	252739	274130	294193	190877	381692	289226	410493
P13674	Prolyl 4-hydroxylase subunit alpha-1 (4-PH alpha-1) (EC 1.14.11.2) (Procollagen-proline,2-oxoglutarate-4-dioxygenase subunit alpha-1)	P4HA1	P4HA1 P4HA	534	3	243654	180403	212292	276295	195649	257667	248928	321935	197893	215836	225332	274549	160755	390719	271747	237778	278137	197620	291715	225502	287363	220696	273928	263058	232484	238223	333239	225024	234377	218498	218400	180615	212060	266036	277735	216752	235149	232154	236884	183164	104506	222976	231395	283436
P13686	Tartrate-resistant acid phosphatase type 5 (TR-AP) (EC 3.1.3.2) (Tartrate-resistant acid ATPase) (TrATPase) (Type 5 acid phosphatase)	ACP5	ACP5	325	3	234807	210868	218525	374998	237185	333826	347621	348585	260048	187389	243544	278380	183157	433856	347827	327482	370693	298687	407590	305953	387325	297431	378031	321180	240747	326212	378272	209853	216603	354979	261539	265616	275007	365840	304023	313771	369088	292662	339882	145350	132409	286404	265125	465087
P13693	Translationally-controlled tumor protein (TCTP) (Fortilin) (Histamine-releasing factor) (HRF) (p23)	TPT1	TPT1	172	3	73326.7	70372.2	83654.7	96384	58527.8	116576	82038.9	91197	56843.1	84664.4	92536.3	89911.9	69223.8	149537	95594.8	76282.3	93293.1	76398.5	95770.7	78612.1	106916	78132.4	66813.7	70046	75931.9	79221.5	103174	69744.1	87946.3	68618.4	76965.8	75545.4	119623	96520.3	102261	92488	69853.9	66813.4	60519.5	65606.9	33778.8	70824.4	57456.4	118434
[truncated: 2,878 more rows]
[truncated: 16 more columns]
