# Supplementary material for: Multi-region proteome analysis quantifies spatial heterogeneity of prostate tissue biomarkers
Source: Life Sci Alliance. 2018 May 29;1(2):e201800042. doi: 10.26508/lsa.201800042 (PMC6078179; doi:10.26508/lsa.201800042)
Supplement: Supplementary file 5 [file LSA-2018-00042_TableS5.xlsx]

## Sheet: legend
Header	Description
intensity	Protein intensity
totv	total variance
biov_nor	biological variance in non-tumor
biov_aci	biological variance in acinar subtype of prostate cancer
biov_duc	biological variance in ductal subtype of prostate cancer
biov_tum	biological variance in tumor (acinar and ductal)
biov	biological variance
techv	technical variance
pval_ecdf	pvalue of use the distribution of the absolute values (the ‘mirror distribution’ into the positive range) as a background distribution for the Null hypothesis that the true biological variance is indistinguishable from zero
group	Based on the biological variance, proteins were classified into 5 groups. See the Method part for the details.

## Sheet: variation
UniProt_ID	Protein names	Gene symbol	Gene names	Protein length	Number of peptides	intenstiy	totv	techv	biov	biov_nor	biov_aci	biov_duc	biov_tum	pval_ecdf	class
P04217	Alpha-1B-glycoprotein (Alpha-1-B glycoprotein)	A1BG	A1BG	495	7	5.22236	0.00317597	0.000867539	0.00230843	0.00266583	0.00268299	0.000112524	0.00204038	0.057377	medium heterogeneity
P01023	Alpha-2-macroglobulin (Alpha-2-M) (C3 and PZP-like alpha-2-macroglobulin domain-containing protein 5)	A2M	A2M CPAMD5 FWP007	1474	17	5.13299	0.00545928	0.000498033	0.00496124	0.00940094	0.00171967	0.00136686	0.00163147	0.0191257	medium heterogeneity
Q9NRG9	Aladin (Adracalin)	AAAS	AAAS ADRACALA GL003	546	3	6.21439	0.0277397	0.00393751	0.0238022	0.0348731	0.0199371	0.00218489	0.015499	0.00273224	variable in BPH
Q8N5Z0	Kynurenine/alpha-aminoadipate aminotransferase, mitochondrial (KAT/AadAT) (2-aminoadipate aminotransferase) (2-aminoadipate transaminase) (EC 2.6.1.39) (Alpha-aminoadipate aminotransferase) (AadAT) (Kynurenine aminotransferase II) (Kynurenine--oxoglutarate aminotransferase II) (Kynurenine--oxoglutarate transaminase 2) (EC 2.6.1.7) (Kynurenine--oxoglutarate transaminase II)	AADAT	AADAT KAT2	425	2	5.29768	0.00651467	0.000856885	0.00565778	0.00848498	0.002361	0.00706654	0.00353738	0.010929	medium heterogeneity
Q2M2I8	AP2-associated protein kinase 1 (EC 2.7.11.1) (Adaptor-associated kinase 1)	AAK1	AAK1 KIAA1048	961	2	5.53475	0.00522546	0.00177542	0.00345005	0.00247864	0.00471991	0.00255467	0.0041786	0.0409836	medium heterogeneity
Q9H7C9	Mth938 domain-containing protein (Adipogenesis associated Mth938 domain-containing protein)	AAMDC	AAMDC C11orf67 PTD015	122	2	4.99506	0.00630738	0.00377625	0.00253113	0.00255428	0.00333106	6.19e-05	0.00251376	0.0546448	medium heterogeneity
P49588	Alanine--tRNA ligase, cytoplasmic (EC 6.1.1.7) (Alanyl-tRNA synthetase) (AlaRS) (Renal carcinoma antigen NY-REN-42)	AARS	AARS	968	12	5.16495	0.00108099	0.000672502	0.000408489	0.000737678	5.06e-05	0.000494656	0.000161597	0.278689	medium heterogeneity
Q5JTZ9	Alanine--tRNA ligase, mitochondrial (EC 6.1.1.7) (Alanyl-tRNA synthetase) (AlaRS)	AARS2	AARS2 AARSL KIAA1270	985	3	5.29057	0.00105205	0.000336927	0.000715121	0.000803197	0.000701697	0.000491161	0.000649063	0.199454	medium heterogeneity
Q9UDR5	Alpha-aminoadipic semialdehyde synthase, mitochondrial (LKR/SDH) [Includes: Lysine ketoglutarate reductase (LKR) (LOR) (EC 1.5.1.8); Saccharopine dehydrogenase (SDH) (EC 1.5.1.9)]	AASS	AASS	926	3	5.40301	0.0112093	0.00201199	0.00919732	0.0141331	0.00281528	0.0135362	0.00549552	0.00273224	variable in BPH
Q9NY61	Protein AATF (Apoptosis-antagonizing transcription factor) (Rb-binding protein Che-1)	AATF	AATF CHE1 DED HSPC277	560	3	5.85124	0.00226778	0.000607102	0.00166067	0.00192097	0.00159363	0.00108091	0.00146545	0.0901639	medium heterogeneity
P80404	4-aminobutyrate aminotransferase, mitochondrial (EC 2.6.1.19) ((S)-3-amino-2-methylpropionate transaminase) (EC 2.6.1.22) (GABA aminotransferase) (GABA-AT) (Gamma-amino-N-butyrate transaminase) (GABA transaminase) (GABA-T) (L-AIBAT)	ABAT	ABAT GABAT	500	13	4.79967	0.00466394	0.00163601	0.00302793	0.000256502	0.00324225	0.0106992	0.0051065	0.0409836	medium heterogeneity
O75027	ATP-binding cassette sub-family B member 7, mitochondrial (ATP-binding cassette transporter 7) (ABC transporter 7 protein)	ABCB7	ABCB7 ABC7	752	2	5.46232	0.00487007	0.00107146	0.00379861	0.00408248	0.00174435	0.00910978	0.00358571	0.0300546	medium heterogeneity
O15439	Multidrug resistance-associated protein 4 (ATP-binding cassette sub-family C member 4) (MRP/cMOAT-related ABC transporter) (Multi-specific organic anion transporter B) (MOAT-B)	ABCC4	ABCC4 MRP4	1325	5	4.56479	0.00676225	0.00301612	0.00374612	0.00653601	0.00214542	0.000178587	0.00165371	0.0300546	medium heterogeneity
P33897	ATP-binding cassette sub-family D member 1 (Adrenoleukodystrophy protein) (ALDP)	ABCD1	ABCD1 ALD	745	2	5.09465	0.00552534	0.00226827	0.00325707	0.00336333	0.00167737	0.00767738	0.00317737	0.0409836	medium heterogeneity
P28288	ATP-binding cassette sub-family D member 3 (70 kDa peroxisomal membrane protein) (PMP70)	ABCD3	ABCD3 PMP70 PXMP1	659	2	5.51888	0.00245564	0.000811958	0.00164368	0.00185283	0.00207918	-0.000290265	0.00148682	0.0901639	medium heterogeneity
P61221	ATP-binding cassette sub-family E member 1 (2'-5'-oligoadenylate-binding protein) (HuHP68) (RNase L inhibitor) (Ribonuclease 4 inhibitor) (RNS4I)	ABCE1	ABCE1 RLI RNASEL1 RNASELI RNS4I OK/SW-cl.40	599	4	5.06595	0.00303829	0.00118081	0.00185748	0.00203341	0.00239767	-0.000290855	0.00172554	0.079235	medium heterogeneity
Q8NE71	ATP-binding cassette sub-family F member 1 (ATP-binding cassette 50) (TNF-alpha-stimulated ABC protein)	ABCF1	ABCF1 ABC50	845	3	4.05146	0.0110176	0.0088754	0.0021422	-0.00261211	0.00468469	0.00877769	0.00570794	0.0655738	medium heterogeneity
Q9UG63	ATP-binding cassette sub-family F member 2 (Iron-inhibited ABC transporter 2)	ABCF2	ABCF2 HUSSY-18	623	3	5.37356	0.00497949	0.00113274	0.00384675	0.00542566	0.00180174	0.00524502	0.00266256	0.0300546	medium heterogeneity
Q9NUJ1	Mycophenolic acid acyl-glucuronide esterase, mitochondrial (EC 3.1.1.93) (Alpha/beta hydrolase domain-containing protein 10) (Abhydrolase domain-containing protein 10)	ABHD10	ABHD10	306	6	4.87443	0.00354888	0.00297131	0.00057757	-0.000790644	0.000592068	0.00463872	0.00160373	0.224044	medium heterogeneity
Q8NFV4	Protein ABHD11 (EC 3.-.-.-) (Alpha/beta hydrolase domain-containing protein 11) (Abhydrolase domain-containing protein 11) (Williams-Beuren syndrome chromosomal region 21 protein)	ABHD11	ABHD11 WBSCR21 PP1226	315	12	5.34375	0.00167952	0.000804226	0.000875295	0.000497006	0.000234111	0.00393372	0.00115901	0.177596	medium heterogeneity
Q96IU4	Protein ABHD14B (EC 3.-.-.-) (Alpha/beta hydrolase domain-containing protein 14B) (Abhydrolase domain-containing protein 14B) (CCG1-interacting factor B)	ABHD14B	ABHD14B CIB	210	8	5.1763	0.00268264	0.000915443	0.00176719	0.00276323	0.000572419	0.00236341	0.00102017	0.0874317	medium heterogeneity
Q6UXT9	Protein ABHD15 (EC 3.1.1.-) (Alpha/beta hydrolase domain-containing protein 15) (Abhydrolase domain-containing protein 15)	ABHD15	ABHD15 UNQ6510/PRO21435	468	2	5.89019	0.00782644	0.0003941	0.00743234	0.0116388	0.00418844	0.00454483	0.00427753	0.00273224	variable in BPH
Q8IZP0	Abl interactor 1 (Abelson interactor 1) (Abi-1) (Abl-binding protein 4) (AblBP4) (Eps8 SH3 domain-binding protein) (Eps8-binding protein) (Nap1-binding protein) (Nap1BP) (Spectrin SH3 domain-binding protein 1) (e3B1)	ABI1	ABI1 SSH3BP1	508	3	5.1695	0.00887357	0.00163876	0.00723482	0.0108329	0.00478383	0.00379358	0.00453627	0.00273224	variable in BPH
Q7Z7G0	Target of Nesh-SH3 (Tarsh) (ABI gene family member 3-binding protein) (Nesh-binding protein) (NeshBP)	ABI3BP	ABI3BP NESHBP TARSH	1075	5	5.52991	0.00126872	0.000705939	0.000562782	0.000163322	0.000698466	0.00135411	0.000862377	0.226776	medium heterogeneity
P42684	Abelson tyrosine-protein kinase 2 (EC 2.7.10.2) (Abelson murine leukemia viral oncogene homolog 2) (Abelson-related gene protein) (Tyrosine-protein kinase ARG)	ABL2	ABL2 ABLL ARG	1182	3	6.14278	0.00137972	0.000905056	0.000474661	0.000578436	0.00034194	0.000561498	0.000396829	0.248634	medium heterogeneity
O14639	Actin-binding LIM protein 1 (abLIM-1) (Actin-binding LIM protein family member 1) (Actin-binding double zinc finger protein) (LIMAB1) (Limatin)	ABLIM1	ABLIM1 ABLIM KIAA0059 LIMAB1	778	6	6.0265	0.00472864	0.000572545	0.00415609	0.00654797	0.00120917	0.00582124	0.00236218	0.0245902	medium heterogeneity
P09110	3-ketoacyl-CoA thiolase, peroxisomal (EC 2.3.1.16) (Acetyl-CoA acyltransferase) (Beta-ketothiolase) (Peroxisomal 3-oxoacyl-CoA thiolase)	ACAA1	ACAA1 ACAA PTHIO	424	13	5.0839	0.00152667	0.00019107	0.0013356	0.00118992	0.000901601	0.00307465	0.00144486	0.117486	medium heterogeneity
P42765	3-ketoacyl-CoA thiolase, mitochondrial (EC 2.3.1.16) (Acetyl-CoA acyltransferase) (Beta-ketothiolase) (Mitochondrial 3-oxoacyl-CoA thiolase) (T1)	ACAA2	ACAA2	397	3	5.23685	0.00244116	0.000768402	0.00167276	0.0016655	0.00144205	0.00238666	0.00167821	0.0901639	medium heterogeneity
Q13085	Acetyl-CoA carboxylase 1 (ACC1) (EC 6.4.1.2) (ACC-alpha) [Includes: Biotin carboxylase (EC 6.3.4.14)]	ACACA	ACACA ACAC ACC1 ACCA	2346	7	5.14488	0.00339321	0.000986909	0.00240631	0.00223164	0.00169215	0.00507275	0.0025373	0.057377	medium heterogeneity
O00763	Acetyl-CoA carboxylase 2 (EC 6.4.1.2) (ACC-beta) [Includes: Biotin carboxylase (EC 6.3.4.14)]	ACACB	ACACB ACC2 ACCB	2458	2	4.59549	0.00371915	0.0023306	0.00138854	0.00250142	0.000999193	-0.000782032	0.000553887	0.114754	medium heterogeneity
Q6JQN1	Acyl-CoA dehydrogenase family member 10 (ACAD-10) (EC 1.3.99.-)	ACAD10	ACAD10	1059	2	5.1398	0.00677781	0.00436878	0.00240904	0.00247016	0.00214487	0.00301818	0.00236319	0.057377	medium heterogeneity
Q9UKU7	Isobutyryl-CoA dehydrogenase, mitochondrial (EC 1.3.99.-) (Activator-recruited cofactor 42 kDa component) (ARC42) (Acyl-CoA dehydrogenase family member 8) (ACAD-8)	ACAD8	ACAD8 ARC42 IBD	415	3	5.10094	0.0019742	0.00177081	0.00020339	-0.000601461	0.00107031	1.72e-05	0.000807028	0.382514	stable in BPH and ADCA
Q9H845	Acyl-CoA dehydrogenase family member 9, mitochondrial (ACAD-9) (EC 1.3.99.-)	ACAD9	ACAD9	621	3	5.23554	0.00297877	0.000857755	0.00212102	0.0019514	0.00225203	0.00223685	0.00224823	0.0655738	medium heterogeneity
P11310	Medium-chain specific acyl-CoA dehydrogenase, mitochondrial (MCAD) (EC 1.3.8.7)	ACADM	ACADM	421	3	5.3932	0.00400759	0.000223161	0.00378443	0.00303953	0.00447728	0.00394057	0.0043431	0.0300546	medium heterogeneity
P16219	Short-chain specific acyl-CoA dehydrogenase, mitochondrial (SCAD) (EC 1.3.8.1) (Butyryl-CoA dehydrogenase)	ACADS	ACADS	412	2	5.28658	0.00247458	0.00175991	0.000714664	0.000762098	0.000739354	0.00049829	0.000679088	0.199454	medium heterogeneity
P45954	Short/branched chain specific acyl-CoA dehydrogenase, mitochondrial (SBCAD) (EC 1.3.8.5) (2-methyl branched chain acyl-CoA dehydrogenase) (2-MEBCAD) (2-methylbutyryl-coenzyme A dehydrogenase) (2-methylbutyryl-CoA dehydrogenase)	ACADSB	ACADSB	432	9	5.19417	0.00269141	0.00054928	0.00214213	0.00233731	0.00135968	0.00390396	0.00199575	0.0655738	medium heterogeneity
P49748	Very long-chain specific acyl-CoA dehydrogenase, mitochondrial (VLCAD) (EC 1.3.8.9)	ACADVL	ACADVL VLCAD	655	11	4.9966	0.00182365	0.000252252	0.0015714	0.00249132	0.00100687	0.000505227	0.00088146	0.0956284	medium heterogeneity
P24752	Acetyl-CoA acetyltransferase, mitochondrial (EC 2.3.1.9) (Acetoacetyl-CoA thiolase) (T2)	ACAT1	ACAT1 ACAT MAT	427	13	5.28921	0.0058595	0.000547443	0.00531206	0.00295718	0.00292322	0.0195432	0.00707822	0.0136612	medium heterogeneity
Q9BWD1	Acetyl-CoA acetyltransferase, cytosolic (EC 2.3.1.9) (Acetyl-CoA transferase-like protein) (Cytosolic acetoacetyl-CoA thiolase)	ACAT2	ACAT2 ACTL	397	4	4.94167	0.00480765	0.000551943	0.0042557	0.00360937	0.0045038	0.00545041	0.00474045	0.0245902	medium heterogeneity
Q9H3P7	Golgi resident protein GCP60 (Acyl-CoA-binding domain-containing protein 3) (Golgi complex-associated protein 1) (GOCAP1) (Golgi phosphoprotein 1) (GOLPH1) (PBR- and PKA-associated protein 7) (Peripheral benzodiazepine receptor-associated protein PAP7) [Cleaved into: Golgi resident protein GCP60, N-terminally processed]	ACBD3	ACBD3 GCP60 GOCAP1 GOLPH1	528	5	4.75485	0.00446914	0.00251326	0.00195588	0.00308748	0.00126634	0.000629688	0.00110718	0.0737705	medium heterogeneity
P12821	Angiotensin-converting enzyme (ACE) (EC 3.2.1.-) (EC 3.4.15.1) (Dipeptidyl carboxypeptidase I) (Kininase II) (CD antigen CD143) [Cleaved into: Angiotensin-converting enzyme, soluble form]	ACE	ACE DCP DCP1	1306	3	5.52781	0.00480832	0.0037376	0.00107072	-0.000163211	0.00174854	0.00273902	0.00199616	0.144809	medium heterogeneity
Q9UKV3	Apoptotic chromatin condensation inducer in the nucleus (Acinus)	ACIN1	ACIN1 ACINUS KIAA0670	1341	4	5.43208	0.00225259	0.00196146	0.000291125	0.001214	-0.000664157	0.000388342	-0.000401032	0.34153	medium heterogeneity
P53396	ATP-citrate synthase (EC 2.3.3.8) (ATP-citrate (pro-S-)-lyase) (ACL) (Citrate cleavage enzyme)	ACLY	ACLY	1101	19	5.17091	0.00344379	0.000780203	0.00266359	0.00124811	0.00183503	0.00939572	0.0037252	0.0491803	medium heterogeneity
P21399	Cytoplasmic aconitate hydratase (Aconitase) (EC 4.2.1.3) (Citrate hydro-lyase) (Ferritin repressor protein) (Iron regulatory protein 1) (IRP1) (Iron-responsive element-binding protein 1) (IRE-BP 1)	ACO1	ACO1 IREB1	889	11	5.33023	0.00571353	0.00340756	0.00230597	0.00125308	0.00327434	0.00255956	0.00309564	0.057377	medium heterogeneity
Q99798	Aconitate hydratase, mitochondrial (Aconitase) (EC 4.2.1.3) (Citrate hydro-lyase)	ACO2	ACO2	780	15	5.39123	0.00228218	0.000708367	0.00157381	0.00177307	8.95e-05	0.0054289	0.00142436	0.0956284	medium heterogeneity
Q8WXI4	Acyl-coenzyme A thioesterase 11 (Acyl-CoA thioesterase 11) (EC 3.1.2.-) (Acyl-CoA thioester hydrolase 11) (Adipose-associated thioesterase) (Brown fat-inducible thioesterase) (BFIT)	ACOT11	ACOT11 BFIT KIAA0707 THEA	607	2	5.54409	0.00935294	0.00206686	0.00728607	0.00308187	0.0122559	0.00498906	0.0104392	0.00273224	variable in ADCA
P49753	Acyl-coenzyme A thioesterase 2, mitochondrial (Acyl-CoA thioesterase 2) (EC 3.1.2.2) (Acyl-coenzyme A thioester hydrolase 2a) (CTE-Ia) (Long-chain acyl-CoA thioesterase 2) (ZAP128)	ACOT2	ACOT2 PTE2 PTE2A	483	3	4.62811	0.0129413	0.011155	0.00178634	-0.00773069	0.0106236	0.00382562	0.00892412	0.0874317	medium heterogeneity
O00154	Cytosolic acyl coenzyme A thioester hydrolase (EC 3.1.2.2) (Acyl-CoA thioesterase 7) (Brain acyl-CoA hydrolase) (BACH) (CTE-IIa) (CTE-II) (Long chain acyl-CoA thioester hydrolase)	ACOT7	ACOT7 BACH	380	2	4.96716	0.0265942	0.00687226	0.019722	0.0252494	0.0217735	-0.00301478	0.0155764	0.00273224	variable in BPH and ADCA
Q9Y305	Acyl-coenzyme A thioesterase 9, mitochondrial (Acyl-CoA thioesterase 9) (EC 3.1.2.-) (Acyl-CoA thioester hydrolase 9)	ACOT9	ACOT9 CGI-16	439	3	5.39437	0.0070753	0.00128576	0.00578953	0.00512422	0.00505292	0.00999528	0.00628851	0.010929	medium heterogeneity
P24666	Low molecular weight phosphotyrosine protein phosphatase (LMW-PTP) (LMW-PTPase) (EC 3.1.3.48) (Adipocyte acid phosphatase) (Low molecular weight cytosolic acid phosphatase) (EC 3.1.3.2) (Red cell acid phosphatase 1)	ACP1	ACP1	158	2	5.5062	0.00497783	0.00280588	0.00217195	0.00246169	0.000800106	0.00541825	0.00195464	0.0628415	medium heterogeneity
P11117	Lysosomal acid phosphatase (LAP) (EC 3.1.3.2)	ACP2	ACP2	423	2	5.38091	0.00492638	0.00170334	0.00322304	0.00302673	0.00224855	0.00673547	0.00337028	0.0409836	medium heterogeneity
P13686	Tartrate-resistant acid phosphatase type 5 (TR-AP) (EC 3.1.3.2) (Tartrate-resistant acid ATPase) (TrATPase) (Type 5 acid phosphatase)	ACP5	ACP5	325	3	5.49633	0.0074853	0.00290968	0.00457562	0.00323961	0.00649004	0.00284041	0.00557763	0.0191257	medium heterogeneity
P15309	Prostatic acid phosphatase (PAP) (EC 3.1.3.2) (5'-nucleotidase) (5'-NT) (EC 3.1.3.5) (Ecto-5'-nucleotidase) (Thiamine monophosphatase) (TMPase) [Cleaved into: PAPf39]	ACPP	ACPP	386	20	5.79598	0.0454703	0.00100228	0.044468	0.0562219	0.0231553	0.0731448	0.0356527	0	variable in BPH and ADCA
Q96CM8	Acyl-CoA synthetase family member 2, mitochondrial (EC 6.2.1.-)	ACSF2	ACSF2 UNQ493/PRO1009	615	3	5.35001	0.0107496	0.00912892	0.00162063	-0.00124532	0.00287306	0.00646118	0.00377009	0.0901639	medium heterogeneity
Q4G176	Acyl-CoA synthetase family member 3, mitochondrial (EC 6.2.1.-)	ACSF3	ACSF3 PSEC0197	576	2	4.74122	0.0162206	0.0156236	0.000596985	-0.00593372	0.00843908	-0.00333719	0.00549501	0.221311	medium heterogeneity
P33121	Long-chain-fatty-acid--CoA ligase 1 (EC 6.2.1.3) (Acyl-CoA synthetase 1) (ACS1) (Long-chain acyl-CoA synthetase 1) (LACS 1) (Long-chain acyl-CoA synthetase 2) (LACS 2) (Long-chain fatty acid-CoA ligase 2) (Palmitoyl-CoA ligase 1) (Palmitoyl-CoA ligase 2)	ACSL1	ACSL1 FACL1 FACL2 LACS LACS1 LACS2	698	5	5.61617	0.00650445	0.00196111	0.00454334	0.00679886	0.00259331	0.00362687	0.0028517	0.0191257	medium heterogeneity
O95573	Long-chain-fatty-acid--CoA ligase 3 (EC 6.2.1.3) (Long-chain acyl-CoA synthetase 3) (LACS 3)	ACSL3	ACSL3 ACS3 FACL3 LACS3	720	7	5.79143	0.00570586	0.000164401	0.00554146	0.0085749	0.0013149	0.00912079	0.00326638	0.010929	medium heterogeneity
Q53FZ2	Acyl-coenzyme A synthetase ACSM3, mitochondrial (EC 6.2.1.2) (Acyl-CoA synthetase medium-chain family member 3) (Butyrate--CoA ligase 3) (Butyryl-coenzyme A synthetase 3) (Middle-chain acyl-CoA synthetase 3) (Protein SA homolog)	ACSM3	ACSM3 SAH	586	5	5.50357	0.00249398	0.000642723	0.00185126	0.00412708	1.77e-05	0.000524519	0.000144392	0.0819672	medium heterogeneity
Q9NUB1	Acetyl-coenzyme A synthetase 2-like, mitochondrial (EC 6.2.1.1) (Acetate--CoA ligase 2) (Acetyl-CoA synthetase 2) (AceCS2) (Acyl-CoA synthetase short-chain family member 1)	ACSS1	ACSS1 ACAS2L KIAA1846	689	6	4.96699	0.00178414	0.000711065	0.00107307	0.000665293	0.00132743	0.00153332	0.0013789	0.144809	medium heterogeneity
P68133	Actin, alpha skeletal muscle (Alpha-actin-1) [Cleaved into: Actin, alpha skeletal muscle, intermediate form]	ACTA1	ACTA1 ACTA	377	6	6.05967	0.0342974	0.00270539	0.031592	0.0544036	0.0099303	0.0281423	0.0144833	0.00273224	variable in BPH
Q562R1	Beta-actin-like protein 2 (Kappa-actin)	ACTBL2	ACTBL2	376	7	6.1684	0.00332675	0.00299929	0.000327458	-0.00188757	0.00217981	0.00141548	0.00198873	0.325137	medium heterogeneity
P63267	Actin, gamma-enteric smooth muscle (Alpha-actin-3) (Gamma-2-actin) (Smooth muscle gamma-actin) [Cleaved into: Actin, gamma-enteric smooth muscle, intermediate form]	ACTG2	ACTG2 ACTA3 ACTL3 ACTSG	376	2	3.97078	0.022886	0.00953065	0.0133553	0.00805085	0.0115228	0.0347663	0.0173337	0.00273224	variable in ADCA
O96019	Actin-like protein 6A (53 kDa BRG1-associated factor A) (Actin-related protein Baf53a) (ArpNbeta) (BRG1-associated factor 53A) (BAF53A) (INO80 complex subunit K)	ACTL6A	ACTL6A BAF53 BAF53A INO80K	429	4	5.13564	0.00132066	0.000518987	0.000801673	0.000328672	0.00131366	0.000684713	0.00115642	0.185792	medium heterogeneity
P12814	Alpha-actinin-1 (Alpha-actinin cytoskeletal isoform) (F-actin cross-linking protein) (Non-muscle alpha-actinin-1)	ACTN1	ACTN1	892	38	5.61257	0.00753135	0.000485706	0.00704564	0.00861574	0.00518374	0.00792106	0.00586807	0.00546448	variable in BPH and ADCA
P35609	Alpha-actinin-2 (Alpha-actinin skeletal muscle isoform 2) (F-actin cross-linking protein)	ACTN2	ACTN2	894	4	5.56096	0.00341914	0.00133373	0.00208541	0.00325557	0.000266766	0.00403088	0.0012078	0.068306	medium heterogeneity
O43707	Alpha-actinin-4 (Non-muscle alpha-actinin 4)	ACTN4	ACTN4	911	24	5.49588	0.00115592	0.00015814	0.000997781	0.0015951	0.000390454	0.00102781	0.000549793	0.161202	medium heterogeneity
Q9NZ32	Actin-related protein 10 (Actin-related protein 11) (hARP11)	ACTR10	ACTR10 ACTR11 ARP11	417	3	5.4746	0.00582705	0.00137336	0.00445369	0.00454207	0.00396505	0.00565446	0.0043874	0.0191257	medium heterogeneity
P61163	Alpha-centractin (Centractin) (ARP1) (Actin-RPV) (Centrosome-associated actin homolog)	ACTR1A	ACTR1A CTRN1	376	4	5.02992	0.00171648	0.00136174	0.000354738	0.000524551	0.000170274	0.000398693	0.000227378	0.306011	medium heterogeneity
P42025	Beta-centractin (Actin-related protein 1B) (ARP1B)	ACTR1B	ACTR1B CTRN2	376	3	4.89919	0.00745549	0.00744303	1.25e-05	-0.00130646	-0.000351914	0.0050623	0.00100164	0.494536	stable in BPH and ADCA
P61160	Actin-related protein 2 (Actin-like protein 2)	ACTR2	ACTR2 ARP2	394	10	5.2931	0.000810106	0.000666021	0.000144085	0.000731235	-0.000266693	-0.00038503	-0.000296278	0.418033	stable in BPH and ADCA
P61158	Actin-related protein 3 (Actin-like protein 3)	ACTR3	ACTR3 ARP3	418	10	5.14089	0.000824516	0.000487962	0.000336555	0.000385462	0.000484551	-0.000254157	0.000299874	0.31694	medium heterogeneity
Q9GZN1	Actin-related protein 6 (hArp6) (hARPX)	ACTR6	ACTR6 CDA12	396	2	5.14707	0.00317734	0.00187676	0.00130058	0.00123422	0.00145343	0.00104112	0.00135035	0.128415	medium heterogeneity
Q9H981	Actin-related protein 8 (hArp8) (INO80 complex subunit N)	ACTR8	ACTR8 ARP8 INO80N	624	2	5.24883	0.00531145	0.00118563	0.00412582	0.00695784	0.00182201	0.00254115	0.0020018	0.0273224	medium heterogeneity
Q03154	Aminoacylase-1 (ACY-1) (EC 3.5.1.14) (N-acyl-L-amino-acid amidohydrolase)	ACY1	ACY1	408	6	5.09392	0.00608006	0.00208327	0.00399679	0.00417801	0.00364463	0.00450959	0.00386087	0.0300546	medium heterogeneity
P14621	Acylphosphatase-2 (EC 3.6.1.7) (Acylphosphatase, muscle type isozyme) (Acylphosphate phosphohydrolase 2)	ACYP2	ACYP2 ACYP	99	2	5.51303	0.00905758	0.0062255	0.00283208	-0.00183769	0.00356541	0.0146414	0.00633441	0.0409836	medium heterogeneity
P00813	Adenosine deaminase (EC 3.5.4.4) (Adenosine aminohydrolase)	ADA	ADA ADA1	363	2	5.31132	0.00796841	0.00184585	0.00612256	0.00535593	0.00860631	0.000971219	0.00669754	0.00819672	variable in BPH and ADCA
O14672	Disintegrin and metalloproteinase domain-containing protein 10 (ADAM 10) (EC 3.4.24.81) (CDw156) (Kuzbanian protein homolog) (Mammalian disintegrin-metalloprotease) (CD antigen CD156c)	ADAM10	ADAM10 KUZ MADM	748	5	5.14551	0.00293301	0.000996459	0.00193655	0.00304668	0.000579584	0.00267707	0.00110395	0.0765027	medium heterogeneity
Q13444	Disintegrin and metalloproteinase domain-containing protein 15 (ADAM 15) (EC 3.4.24.-) (Metalloprotease RGD disintegrin protein) (Metalloproteinase-like, disintegrin-like, and cysteine-rich protein 15) (MDC-15) (Metargidin)	ADAM15	ADAM15 MDC15	863	2	5.6554	0.00701997	0.000679362	0.00634061	0.0105798	0.00175745	0.00737257	0.00316123	0.00819672	variable in BPH
Q9UHI8	A disintegrin and metalloproteinase with thrombospondin motifs 1 (ADAM-TS 1) (ADAM-TS1) (ADAMTS-1) (EC 3.4.24.-) (METH-1)	ADAMTS1	ADAMTS1 KIAA1346 METH1	967	7	4.99298	0.00701764	0.00364168	0.00337596	0.00373467	0.00436758	-0.000675044	0.00310692	0.0409836	medium heterogeneity
P55265	Double-stranded RNA-specific adenosine deaminase (DRADA) (EC 3.5.4.37) (136 kDa double-stranded RNA-binding protein) (p136) (Interferon-inducible protein 4) (IFI-4) (K88DSRBP)	ADAR	ADAR ADAR1 DSRAD G1P1 IFI4	1226	4	5.11608	0.00312411	0.000997814	0.0021263	0.00015264	0.00412784	0.00204266	0.00360655	0.0655738	medium heterogeneity
P35611	Alpha-adducin (Erythrocyte adducin subunit alpha)	ADD1	ADD1 ADDA	737	3	4.74647	0.0083912	0.00570313	0.00268807	0.00180766	0.00408062	0.00115162	0.00334837	0.0464481	medium heterogeneity
Q9UEY8	Gamma-adducin (Adducin-like protein 70)	ADD3	ADD3 ADDL	706	5	5.63296	0.00647902	0.000639061	0.00583996	0.00489723	0.0075602	0.00350742	0.006547	0.00819672	variable in BPH and ADCA
P00325	Alcohol dehydrogenase 1B (EC 1.1.1.1) (Alcohol dehydrogenase subunit beta)	ADH1B	ADH1B ADH2	375	3	4.85004	0.00237984	0.00230937	7.05e-05	0.00180146	-0.00173657	0.000298661	-0.00122777	0.456284	stable in BPH and ADCA
Q15847	Adipogenesis regulatory factor (Adipogenesis factor rich in obesity) (Adipose most abundant gene transcript 2 protein) (Adipose-specific protein 2) (apM-2)	ADIRF	ADIRF AFRO APM2 C10orf116	76	2	5.01521	0.0168549	0.011411	0.0054439	0.00329206	0.0063848	0.00907674	0.00705778	0.010929	medium heterogeneity
P55263	Adenosine kinase (AK) (EC 2.7.1.20) (Adenosine 5'-phosphotransferase)	ADK	ADK	362	4	4.71514	0.0104662	0.00880836	0.00165785	0.000886969	0.00405513	-0.00322135	0.00223601	0.0901639	medium heterogeneity
Q9H2P0	Activity-dependent neuroprotector homeobox protein (Activity-dependent neuroprotective protein)	ADNP	ADNP ADNP1 KIAA0784	1102	3	5.15797	0.00481613	0.0019171	0.00289902	0.00161876	0.00259866	0.00764091	0.00385922	0.0409836	medium heterogeneity
Q9NX46	Poly(ADP-ribose) glycohydrolase ARH3 (EC 3.2.1.143) (ADP-ribosylhydrolase 3) ([Protein ADP-ribosylarginine] hydrolase-like protein 2)	ADPRHL2	ADPRHL2 ARH3	363	3	5.58143	0.00548876	0.00218089	0.00330787	0.00152708	0.00529612	0.00268548	0.00464346	0.0409836	medium heterogeneity
P30520	Adenylosuccinate synthetase isozyme 2 (AMPSase 2) (AdSS 2) (EC 6.3.4.4) (Adenylosuccinate synthetase, acidic isozyme) (Adenylosuccinate synthetase, liver isozyme) (L-type adenylosuccinate synthetase) (IMP--aspartate ligase 2)	ADSS	ADSS ADSS2	456	4	5.5599	0.00212481	0.00209546	2.93e-05	-0.000550155	-3.86e-05	0.00197183	0.000463978	0.47541	stable in BPH and ADCA
Q8N142	Adenylosuccinate synthetase isozyme 1 (AMPSase 1) (AdSS 1) (EC 6.3.4.4) (Adenylosuccinate synthetase, basic isozyme) (Adenylosuccinate synthetase, muscle isozyme) (M-type adenylosuccinate synthetase) (IMP--aspartate ligase 1)	ADSSL1	ADSSL1 ADSS1	457	2	5.62796	0.00724168	0.00136554	0.00587614	0.00354263	0.00966829	0.0015002	0.00762627	0.00819672	variable in ADCA
Q8IUX7	Adipocyte enhancer-binding protein 1 (AE-binding protein 1) (Aortic carboxypeptidase-like protein)	AEBP1	AEBP1 ACLP	1158	4	5.12818	0.00306761	0.000997572	0.00207004	0.00258936	0.000393248	0.00554242	0.00168054	0.068306	medium heterogeneity
P55196	Afadin (ALL1-fused gene from chromosome 6 protein) (Protein AF-6) (Afadin adherens junction formation factor)	AFDN	AFDN AF6 MLLT4	1824	6	5.48249	0.00186178	0.000612969	0.00124881	0.00126938	0.000861896	0.00234785	0.00123339	0.128415	medium heterogeneity
Q9Y4W6	AFG3-like protein 2 (EC 3.4.24.-) (Paraplegin-like protein)	AFG3L2	AFG3L2	797	4	6.06476	0.00109015	0.000132078	0.000958076	0.00117556	0.000994133	0.00019744	0.00079496	0.166667	medium heterogeneity
P43652	Afamin (Alpha-albumin) (Alpha-Alb)	AFM	AFM ALB2 ALBA	599	5	5.44519	0.0046666	0.00119347	0.00347313	0.00462198	0.00191009	0.00471571	0.0026115	0.0382514	medium heterogeneity
P52594	Arf-GAP domain and FG repeat-containing protein 1 (HIV-1 Rev-binding protein) (Nucleoporin-like protein RIP) (Rev-interacting protein) (Rev/Rex activation domain-binding protein)	AGFG1	AGFG1 HRB RAB RIP	562	2	5.071	0.00548195	0.00307064	0.0024113	0.00219135	0.00219968	0.00370605	0.00257627	0.057377	medium heterogeneity
Q53H12	Acylglycerol kinase, mitochondrial (hAGK) (EC 2.7.1.107) (EC 2.7.1.94) (Multiple substrate lipid kinase) (HsMuLK) (MuLK) (Multi-substrate lipid kinase)	AGK	AGK MULK	422	4	5.4977	0.0054242	0.000785037	0.00463916	0.00462213	0.00487133	0.00399376	0.00465194	0.0191257	medium heterogeneity
P35573	Glycogen debranching enzyme (Glycogen debrancher) [Includes: 4-alpha-glucanotransferase (EC 2.4.1.25) (Oligo-1,4-1,4-glucantransferase); Amylo-alpha-1,6-glucosidase (Amylo-1,6-glucosidase) (EC 3.2.1.33) (Dextrin 6-alpha-D-glucosidase)]	AGL	AGL GDE	1532	7	5.53881	0.00738766	0.000235547	0.00715212	0.0103591	0.00333598	0.00897968	0.00474691	0.00273224	variable in BPH
Q9BSE5	Agmatinase, mitochondrial (EC 3.5.3.11) (Agmatine ureohydrolase) (AUH)	AGMAT	AGMAT	352	2	5.87628	0.00474468	0.000544187	0.00420049	0.0045786	0.00457745	0.00193527	0.0039169	0.0245902	medium heterogeneity
Q9UL18	Protein argonaute-1 (Argonaute1) (hAgo1) (Argonaute RISC catalytic component 1) (Eukaryotic translation initiation factor 2C 1) (eIF-2C 1) (eIF2C 1) (Putative RNA-binding protein Q99)	AGO1	AGO1 EIF2C1	857	2	5.54212	0.0086802	0.00220277	0.00647743	0.0106732	0.00243698	0.00601133	0.00333056	0.00819672	variable in BPH
Q9UKV8	Protein argonaute-2 (Argonaute2) (hAgo2) (EC 3.1.26.n2) (Argonaute RISC catalytic component 2) (Eukaryotic translation initiation factor 2C 2) (eIF-2C 2) (eIF2C 2) (PAZ Piwi domain protein) (PPD) (Protein slicer)	AGO2	AGO2 EIF2C2	859	4	5.5837	0.00881472	0.00220881	0.00660591	0.00827389	0.00538104	0.00527658	0.00535493	0.00819672	variable in BPH and ADCA
O00116	Alkyldihydroxyacetonephosphate synthase, peroxisomal (Alkyl-DHAP synthase) (EC 2.5.1.26) (Aging-associated gene 5 protein) (Alkylglycerone-phosphate synthase)	AGPS	AGPS AAG5	658	2	5.49753	0.00554117	0.00127718	0.00426399	0.00245391	0.00483954	0.00796761	0.00562155	0.0245902	medium heterogeneity
O95994	Anterior gradient protein 2 homolog (AG-2) (hAG-2) (HPC8) (Secreted cement gland protein XAG-2 homolog)	AGR2	AGR2 AG2 UNQ515/PRO1030	175	3	5.26798	0.00528186	0.00113297	0.00414889	0.00359369	0.00293745	0.00944881	0.00456529	0.0245902	medium heterogeneity
O00468	Agrin [Cleaved into: Agrin N-terminal 110 kDa subunit; Agrin C-terminal 110 kDa subunit; Agrin C-terminal 90 kDa fragment (C90); Agrin C-terminal 22 kDa fragment (C22)]	AGRN	AGRN AGRIN	2067	7	5.23294	0.00132183	0.000701504	0.000620331	0.000884305	0.000265404	0.000893186	0.00042235	0.213115	medium heterogeneity
P01019	Angiotensinogen (Serpin A8) [Cleaved into: Angiotensin-1 (Angiotensin 1-10) (Angiotensin I) (Ang I); Angiotensin-2 (Angiotensin 1-8) (Angiotensin II) (Ang II); Angiotensin-3 (Angiotensin 2-8) (Angiotensin III) (Ang III) (Des-Asp[1]-angiotensin II); Angiotensin-4 (Angiotensin 3-8) (Angiotensin IV) (Ang IV); Angiotensin 1-9; Angiotensin 1-7; Angiotensin 1-5; Angiotensin 1-4]	AGT	AGT SERPINA8	485	5	5.49957	0.00109966	0.000395016	0.000704641	0.000918633	0.000613871	0.000334974	0.000544147	0.202186	medium heterogeneity
Q6RW13	Type-1 angiotensin II receptor-associated protein (AT1 receptor-associated protein)	AGTRAP	AGTRAP ATRAP	159	3	5.29905	0.00158831	0.00149091	9.74e-05	0.000335106	-0.000275049	0.000501607	-8.09e-05	0.448087	stable in BPH and ADCA
P23526	Adenosylhomocysteinase (AdoHcyase) (EC 3.3.1.1) (S-adenosyl-L-homocysteine hydrolase)	AHCY	AHCY SAHH	432	11	5.35089	0.00162358	0.000277023	0.00134656	0.00142726	0.00104784	0.00200057	0.00128603	0.117486	medium heterogeneity
O43865	S-adenosylhomocysteine hydrolase-like protein 1 (DC-expressed AHCY-like molecule) (IP(3)Rs binding protein released with IP(3)) (IRBIT) (Putative adenosylhomocysteinase 2) (S-adenosyl-L-homocysteine hydrolase 2) (AdoHcyase 2)	AHCYL1	AHCYL1 DCAL IRBIT XPVKONA	530	2	5.11525	0.00727414	0.00268506	0.00458907	0.00448391	0.00555496	0.00200691	0.00466795	0.0191257	medium heterogeneity
Q96HN2	Adenosylhomocysteinase 3 (AdoHcyase 3) (EC 3.3.1.1) (IP(3)Rs binding protein released with IP(3) 2) (IRBIT2) (Long-IRBIT) (S-adenosyl-L-homocysteine hydrolase 3) (S-adenosylhomocysteine hydrolase-like protein 2)	AHCYL2	AHCYL2 KIAA0828	611	3	5.52383	0.00303348	0.00290766	0.000125821	0.000958204	-0.000233529	-0.00129328	-0.000498466	0.428962	stable in BPH and ADCA
Q5TGY3	AT-hook DNA-binding motif-containing protein 1	AHDC1	AHDC1	1603	3	5.84621	0.00829503	0.00184135	0.00645368	0.00665773	0.00646078	0.00582024	0.00630064	0.00819672	variable in BPH and ADCA
Q09666	Neuroblast differentiation-associated protein AHNAK (Desmoyokin)	AHNAK	AHNAK PM227	5890	46	5.24638	0.00225768	0.000657565	0.00160011	0.00188033	0.00163808	0.00064554	0.00138995	0.0928962	medium heterogeneity
Q8IVF2	Protein AHNAK2	AHNAK2	AHNAK2 C14orf78 KIAA2019	5795	3	5.80827	0.000661221	0.000263824	0.000397396	0.000210049	0.000287974	0.00128771	0.000537907	0.286885	medium heterogeneity
O95433	Activator of 90 kDa heat shock protein ATPase homolog 1 (AHA1) (p38)	AHSA1	AHSA1 C14orf3 HSPC322	338	4	5.07767	0.00430782	0.00161003	0.00269779	0.00445943	0.00100328	0.00249641	0.00137656	0.0437158	medium heterogeneity
P02765	Alpha-2-HS-glycoprotein (Alpha-2-Z-globulin) (Ba-alpha-2-glycoprotein) (Fetuin-A) [Cleaved into: Alpha-2-HS-glycoprotein chain A; Alpha-2-HS-glycoprotein chain B]	AHSG	AHSG FETUA PRO2743	367	3	5.0745	0.00578702	0.00113286	0.00465416	0.00316291	0.00296773	0.0141872	0.0057726	0.0191257	medium heterogeneity
O95831	Apoptosis-inducing factor 1, mitochondrial (EC 1.1.1.-) (Programmed cell death protein 8)	AIFM1	AIFM1 AIF PDCD8	613	11	5.06892	0.000882276	0.000427946	0.00045433	0.00071055	0.000143192	0.000619088	0.000262166	0.256831	medium heterogeneity
Q9BRQ8	Apoptosis-inducing factor 2 (EC 1.-.-.-) (Apoptosis-inducing factor homologous mitochondrion-associated inducer of death) (Apoptosis-inducing factor-like mitochondrion-associated inducer of death) (p53-responsive gene 3 protein)	AIFM2	AIFM2 AMID PRG3	373	2	5.40156	0.00571528	0.0010157	0.00469958	0.00323302	0.00342346	0.0129276	0.00579949	0.0191257	medium heterogeneity
Q96NN9	Apoptosis-inducing factor 3 (EC 1.-.-.-) (Apoptosis-inducing factor-like protein)	AIFM3	AIFM3 AIFL	605	2	5.38762	0.00908856	0.00376358	0.00532498	0.00902513	0.00333974	0.000180205	0.00254986	0.0136612	medium heterogeneity
Q12904	Aminoacyl tRNA synthase complex-interacting multifunctional protein 1 (Multisynthase complex auxiliary component p43) [Cleaved into: Endothelial monocyte-activating polypeptide 2 (EMAP-2) (Endothelial monocyte-activating polypeptide II) (EMAP-II) (Small inducible cytokine subfamily E member 1)]	AIMP1	AIMP1 EMAP2 SCYE1	312	6	5.01618	0.00131563	0.000656513	0.000659117	0.00108132	0.000546316	-0.000269078	0.000342468	0.20765	medium heterogeneity
Q13155	Aminoacyl tRNA synthase complex-interacting multifunctional protein 2 (Multisynthase complex auxiliary component p38) (Protein JTV-1)	AIMP2	AIMP2 JTV1 PRO0992	320	3	4.86709	0.00632616	0.00132209	0.00500406	0.00784311	0.00272683	0.00331862	0.00287478	0.0191257	medium heterogeneity
O00170	AH receptor-interacting protein (AIP) (Aryl-hydrocarbon receptor-interacting protein) (HBV X-associated protein 2) (XAP-2) (Immunophilin homolog ARA9)	AIP	AIP XAP2	330	3	5.54234	0.00685511	0.00442516	0.00242995	0.00317421	0.00108855	0.00422135	0.00187175	0.057377	medium heterogeneity
P00568	Adenylate kinase isoenzyme 1 (AK 1) (EC 2.7.4.3) (EC 2.7.4.6) (ATP-AMP transphosphorylase 1) (ATP:AMP phosphotransferase) (Adenylate monophosphate kinase) (Myokinase)	AK1	AK1	194	3	5.4537	0.00410433	0.00162349	0.00248084	0.00194075	0.00188604	0.00588549	0.0028859	0.0546448	medium heterogeneity
P54819	Adenylate kinase 2, mitochondrial (AK 2) (EC 2.7.4.3) (ATP-AMP transphosphorylase 2) (ATP:AMP phosphotransferase) (Adenylate monophosphate kinase) [Cleaved into: Adenylate kinase 2, mitochondrial, N-terminally processed]	AK2	AK2 ADK2	239	6	5.3125	0.00384604	0.00150838	0.00233766	0.00335407	0.0010323	0.00320449	0.00157535	0.057377	medium heterogeneity
Q9UIJ7	GTP:AMP phosphotransferase AK3, mitochondrial (EC 2.7.4.10) (Adenylate kinase 3) (AK 3) (Adenylate kinase 3 alpha-like 1)	AK3	AK3 AK3L1 AK6 AKL3L	227	5	5.31009	0.00114131	0.000561431	0.000579878	0.000636421	0.000616043	0.000301757	0.000537472	0.224044	medium heterogeneity
P27144	Adenylate kinase 4, mitochondrial (AK 4) (EC 2.7.4.10) (EC 2.7.4.6) (Adenylate kinase 3-like) (GTP:AMP phosphotransferase AK4)	AK4	AK4 AK3 AK3L1	223	6	5.1426	0.00601502	0.00442008	0.00159494	0.00274487	0.000788441	0.000564661	0.000732496	0.0928962	medium heterogeneity
Q9Y3D8	Adenylate kinase isoenzyme 6 (AK6) (EC 2.7.4.3) (Adrenal gland protein AD-004) (Coilin-interacting nuclear ATPase protein) (hCINAP) (Dual activity adenylate kinase/ATPase) (AK/ATPase)	AK6	AK6 CINAP AD-004 CGI-137	172	2	5.83989	0.00110946	0.000529394	0.000580061	0.000850509	0.000325181	0.000533358	0.000377225	0.224044	medium heterogeneity
Q9UKA4	A-kinase anchor protein 11 (AKAP-11) (A-kinase anchor protein 220 kDa) (AKAP 220) (hAKAP220) (Protein kinase A-anchoring protein 11) (PRKA11)	AKAP11	AKAP11 AKAP220 KIAA0629	1901	4	5.3504	0.00196425	0.0006914	0.00127285	0.000694473	0.00175407	0.00156434	0.00170664	0.128415	medium heterogeneity
Q02952	A-kinase anchor protein 12 (AKAP-12) (A-kinase anchor protein 250 kDa) (AKAP 250) (Gravin) (Myasthenia gravis autoantigen)	AKAP12	AKAP12 AKAP250	1782	7	5.37909	0.00198225	0.000401895	0.00158036	0.00203891	0.00159448	0.000162333	0.00123645	0.0956284	medium heterogeneity
Q12802	A-kinase anchor protein 13 (AKAP-13) (AKAP-Lbc) (Breast cancer nuclear receptor-binding auxiliary protein) (Guanine nucleotide exchange factor Lbc) (Human thyroid-anchoring protein 31) (Lymphoid blast crisis oncogene) (LBC oncogene) (Non-oncogenic Rho GTPase-specific GTP exchange factor) (Protein kinase A-anchoring protein 13) (PRKA13) (p47)	AKAP13	AKAP13 BRX HT31 LBC	2813	6	5.54424	0.00380372	0.000694388	0.00310933	0.00314576	0.0014953	0.00784215	0.00308201	0.0409836	medium heterogeneity
Q9Y2D5	A-kinase anchor protein 2 (AKAP-2) (AKAP-KL) (Protein kinase A-anchoring protein 2) (PRKA2)	AKAP2	AKAP2 KIAA0920 PRKA2	859	5	5.60741	0.0028261	0.000380135	0.00244596	0.00374865	0.000784147	0.00352335	0.00146895	0.057377	medium heterogeneity
Q99996	A-kinase anchor protein 9 (AKAP-9) (A-kinase anchor protein 350 kDa) (AKAP 350) (hgAKAP 350) (A-kinase anchor protein 450 kDa) (AKAP 450) (AKAP 120-like protein) (Centrosome- and Golgi-localized PKN-associated protein) (CG-NAP) (Protein hyperion) (Protein kinase A-anchoring protein 9) (PRKA9) (Protein yotiao)	AKAP9	AKAP9 AKAP350 AKAP450 KIAA0803	3911	4	5.93848	0.00289727	0.000921889	0.00197539	0.00307739	0.000471999	0.00317954	0.00114888	0.0710383	medium heterogeneity
P14550	Alcohol dehydrogenase [NADP(+)] (EC 1.1.1.2) (Aldehyde reductase) (Aldo-keto reductase family 1 member A1)	AKR1A1	AKR1A1 ALDR1 ALR	325	9	5.41621	0.00366934	0.00090727	0.00276207	0.00191864	0.00225004	0.00682846	0.00339464	0.0409836	medium heterogeneity
P15121	Aldose reductase (AR) (EC 1.1.1.21) (Aldehyde reductase) (Aldo-keto reductase family 1 member B1)	AKR1B1	AKR1B1 ALDR1	316	5	4.81648	0.00261452	0.000575631	0.00203889	0.00119283	0.00268226	0.00264697	0.00267343	0.068306	medium heterogeneity
O43488	Aflatoxin B1 aldehyde reductase member 2 (EC 1.1.1.n11) (AFB1 aldehyde reductase 1) (AFB1-AR 1) (Aldoketoreductase 7) (Succinic semialdehyde reductase) (SSA reductase)	AKR7A2	AKR7A2 AFAR AFAR1 AKR7	359	4	5.56159	0.00132161	0.000924312	0.000397303	0.000884254	-0.000192953	0.000707222	3.21e-05	0.286885	medium heterogeneity
P31749	RAC-alpha serine/threonine-protein kinase (EC 2.7.11.1) (Protein kinase B) (PKB) (Protein kinase B alpha) (PKB alpha) (Proto-oncogene c-Akt) (RAC-PK-alpha)	AKT1	AKT1 PKB RAC	480	2	4.87184	0.017865	0.00897144	0.00889352	0.00799418	0.010181	0.00772899	0.00956802	0.00273224	variable in BPH and ADCA
Q9Y243	RAC-gamma serine/threonine-protein kinase (EC 2.7.11.1) (Protein kinase Akt-3) (Protein kinase B gamma) (PKB gamma) (RAC-PK-gamma) (STK-2)	AKT3	AKT3 PKBG	479	3	5.59302	0.005155	0.000265829	0.00488917	0.00745066	0.00198232	0.00592524	0.00296805	0.0191257	medium heterogeneity
P13716	Delta-aminolevulinic acid dehydratase (ALADH) (EC 4.2.1.24) (Porphobilinogen synthase)	ALAD	ALAD	330	2	5.38777	0.00721968	0.000377271	0.00684241	0.00330093	0.0108117	0.00555884	0.00949851	0.00546448	variable in ADCA
P02768	Serum albumin	ALB	ALB GIG20 GIG42 PRO0903 PRO1708 PRO2044 PRO2619 PRO2675 UNQ696/PRO1341	609	47	6.3433	0.00843786	0.000485194	0.00795266	0.0104446	0.00545558	0.00796811	0.00608372	0.00273224	variable in BPH and ADCA
Q13740	CD166 antigen (Activated leukocyte cell adhesion molecule) (CD antigen CD166)	ALCAM	ALCAM MEMD	583	13	4.9775	0.0028532	0.000809636	0.00204357	0.00134	0.00144405	0.00595283	0.00257125	0.068306	medium heterogeneity
Q8IZ83	Aldehyde dehydrogenase family 16 member A1	ALDH16A1	ALDH16A1	802	2	5.2779	0.00397514	0.00111601	0.00285913	0.00559715	1.43e-05	0.0031796	0.000805605	0.0409836	medium heterogeneity
P54886	Delta-1-pyrroline-5-carboxylate synthase (P5CS) (Aldehyde dehydrogenase family 18 member A1) [Includes: Glutamate 5-kinase (GK) (EC 2.7.2.11) (Gamma-glutamyl kinase); Gamma-glutamyl phosphate reductase (GPR) (EC 1.2.1.41) (Glutamate-5-semialdehyde dehydrogenase) (Glutamyl-gamma-semialdehyde dehydrogenase)]	ALDH18A1	ALDH18A1 GSAS P5CS PYCS	795	5	5.84324	0.00637999	0.000522692	0.00585729	0.0091827	0.00243051	0.00616141	0.00336323	0.00819672	variable in BPH
P00352	Retinal dehydrogenase 1 (RALDH 1) (RalDH1) (EC 1.2.1.-) (EC 1.2.1.36) (ALDH-E1) (ALHDII) (Aldehyde dehydrogenase family 1 member A1) (Aldehyde dehydrogenase, cytosolic)	ALDH1A1	ALDH1A1 ALDC ALDH1 PUMB1	501	17	5.17846	0.00183213	0.000164941	0.00166719	0.00258538	0.000979354	0.000976123	0.000978546	0.0901639	medium heterogeneity
O94788	Retinal dehydrogenase 2 (RALDH 2) (RalDH2) (EC 1.2.1.36) (Aldehyde dehydrogenase family 1 member A2) (Retinaldehyde-specific dehydrogenase type 2) (RALDH(II))	ALDH1A2	ALDH1A2 RALDH2	518	3	5.18422	0.00526594	0.0020245	0.00324145	0.00222026	0.00408674	0.00376915	0.00400734	0.0409836	medium heterogeneity
P47895	Aldehyde dehydrogenase family 1 member A3 (EC 1.2.1.5) (Aldehyde dehydrogenase 6) (Retinaldehyde dehydrogenase 3) (RALDH-3) (RalDH3)	ALDH1A3	ALDH1A3 ALDH6	512	12	5.29578	0.00383688	0.00151795	0.00231894	-0.000123738	0.00173525	0.011398	0.00415094	0.057377	medium heterogeneity
P30837	Aldehyde dehydrogenase X, mitochondrial (EC 1.2.1.3) (Aldehyde dehydrogenase 5) (Aldehyde dehydrogenase family 1 member B1)	ALDH1B1	ALDH1B1 ALDH5 ALDHX	517	9	4.99856	0.0076723	0.000775084	0.00689721	0.0120288	0.0014386	0.0078784	0.00304855	0.00546448	variable in BPH
O75891	Cytosolic 10-formyltetrahydrofolate dehydrogenase (10-FTHFDH) (FDH) (EC 1.5.1.6) (Aldehyde dehydrogenase family 1 member L1)	ALDH1L1	ALDH1L1 FTHFD	902	4	5.32245	0.00292633	0.00109722	0.00182911	0.00304204	0.00103616	0.000569196	0.00091942	0.0819672	medium heterogeneity
Q3SY69	Mitochondrial 10-formyltetrahydrofolate dehydrogenase (Mitochondrial 10-FTHFDH) (mtFDH) (EC 1.5.1.6) (Aldehyde dehydrogenase family 1 member L2)	ALDH1L2	ALDH1L2	923	2	5.42264	0.0254481	0.00392938	0.0215187	0.0307036	0.0131877	0.0189569	0.01463	0.00273224	variable in BPH
P05091	Aldehyde dehydrogenase, mitochondrial (EC 1.2.1.3) (ALDH class 2) (ALDH-E2) (ALDHI)	ALDH2	ALDH2 ALDM	517	20	5.34585	0.00208451	0.000903885	0.00118063	0.000978729	0.00189394	-0.000353602	0.00133205	0.13388	medium heterogeneity
P30838	Aldehyde dehydrogenase, dimeric NADP-preferring (EC 1.2.1.5) (ALDHIII) (Aldehyde dehydrogenase 3) (Aldehyde dehydrogenase family 3 member A1)	ALDH3A1	ALDH3A1 ALDH3	453	2	5.31132	0.0112045	0.00124715	0.0099574	0.0121789	0.00526676	0.0173648	0.00829127	0.00273224	variable in BPH and ADCA
P51648	Fatty aldehyde dehydrogenase (EC 1.2.1.3) (Aldehyde dehydrogenase 10) (Aldehyde dehydrogenase family 3 member A2) (Microsomal aldehyde dehydrogenase)	ALDH3A2	ALDH3A2 ALDH10 FALDH	485	5	4.77593	0.00273182	0.00100745	0.00172437	0.00207431	0.0015369	0.00123698	0.00146192	0.0874317	medium heterogeneity
P30038	Delta-1-pyrroline-5-carboxylate dehydrogenase, mitochondrial (P5C dehydrogenase) (EC 1.2.1.88) (Aldehyde dehydrogenase family 4 member A1) (L-glutamate gamma-semialdehyde dehydrogenase)	ALDH4A1	ALDH4A1 ALDH4 P5CDH	563	14	5.2728	0.00643231	0.00121223	0.00522009	0.00293516	0.00491038	0.013004	0.00693378	0.0136612	medium heterogeneity
P51649	Succinate-semialdehyde dehydrogenase, mitochondrial (EC 1.2.1.24) (Aldehyde dehydrogenase family 5 member A1) (NAD(+)-dependent succinic semialdehyde dehydrogenase)	ALDH5A1	ALDH5A1 SSADH	535	4	4.96642	0.0107942	0.00707273	0.00372152	0.00462233	0.00396289	0.000294952	0.0030459	0.0300546	medium heterogeneity
Q02252	Methylmalonate-semialdehyde dehydrogenase [acylating], mitochondrial (MMSDH) (Malonate-semialdehyde dehydrogenase [acylating]) (EC 1.2.1.18) (EC 1.2.1.27) (Aldehyde dehydrogenase family 6 member A1)	ALDH6A1	ALDH6A1 MMSDH	535	24	5.49988	0.00461323	0.000270522	0.00434271	0.00252407	0.00282397	0.0143548	0.00570669	0.0191257	medium heterogeneity
P49419	Alpha-aminoadipic semialdehyde dehydrogenase (Alpha-AASA dehydrogenase) (EC 1.2.1.31) (Aldehyde dehydrogenase family 7 member A1) (EC 1.2.1.3) (Antiquitin-1) (Betaine aldehyde dehydrogenase) (EC 1.2.1.8) (Delta1-piperideine-6-carboxylate dehydrogenase) (P6c dehydrogenase)	ALDH7A1	ALDH7A1 ATQ1	539	21	5.26125	0.00353345	0.000308837	0.00322462	0.00135927	0.00289371	0.00981336	0.00462363	0.0409836	medium heterogeneity
P49189	4-trimethylaminobutyraldehyde dehydrogenase (TMABADH) (EC 1.2.1.47) (Aldehyde dehydrogenase E3 isozyme) (Aldehyde dehydrogenase family 9 member A1) (EC 1.2.1.3) (Gamma-aminobutyraldehyde dehydrogenase) (EC 1.2.1.19) (R-aminobutyraldehyde dehydrogenase) [Cleaved into: 4-trimethylaminobutyraldehyde dehydrogenase, N-terminally processed]	ALDH9A1	ALDH9A1 ALDH4 ALDH7 ALDH9	494	14	5.23683	0.00296621	0.000380716	0.00258549	0.00161543	0.00274327	0.00502235	0.00331304	0.0519126	medium heterogeneity
P04075	Fructose-bisphosphate aldolase A (EC 4.1.2.13) (Lung cancer antigen NY-LU-1) (Muscle-type aldolase)	ALDOA	ALDOA ALDA	364	22	5.58928	0.00118546	0.00039008	0.000795379	0.000957262	0.000794702	0.000311758	0.000673966	0.185792	medium heterogeneity
P05062	Fructose-bisphosphate aldolase B (EC 4.1.2.13) (Liver-type aldolase)	ALDOB	ALDOB ALDB	364	4	5.52316	0.00255285	0.000268219	0.00228463	0.00382823	0.000957088	0.00163646	0.00112693	0.0601093	medium heterogeneity
P09972	Fructose-bisphosphate aldolase C (EC 4.1.2.13) (Brain-type aldolase)	ALDOC	ALDOC ALDC	364	4	5.43888	0.00257597	0.00110755	0.00146842	0.00111643	0.00241755	-0.000323021	0.00173241	0.103825	medium heterogeneity
Q9H553	Alpha-1,3/1,6-mannosyltransferase ALG2 (EC 2.4.1.132) (EC 2.4.1.257) (Asparagine-linked glycosylation protein 2 homolog) (GDP-Man:Man(1)GlcNAc(2)-PP-Dol alpha-1,3-mannosyltransferase) (GDP-Man:Man(1)GlcNAc(2)-PP-dolichol mannosyltransferase) (GDP-Man:Man(2)GlcNAc(2)-PP-Dol alpha-1,6-mannosyltransferase)	ALG2	ALG2 UNQ666/PRO1298	416	2	6.02607	0.00835285	0.000249025	0.00810382	0.00731222	0.00976764	0.00548719	0.00869752	0.00273224	variable in BPH and ADCA
O15296	Arachidonate 15-lipoxygenase B (15-LOX-B) (EC 1.13.11.33) (15-lipoxygenase 2) (15-LOX-2) (Arachidonate 15-lipoxygenase type II) (Linoleate 13-lipoxygenase 15-LOb) (EC 1.13.11.-)	ALOX15B	ALOX15B	676	5	5.04419	0.00387438	0.001246	0.00262837	0.000396122	0.00551099	0.000677258	0.00430256	0.0491803	medium heterogeneity
P09917	Arachidonate 5-lipoxygenase (5-LO) (5-lipoxygenase) (EC 1.13.11.34)	ALOX5	ALOX5 LOG5	674	2	5.46208	0.00288056	0.00120909	0.00167147	0.0011553	0.00193219	0.00243779	0.00205859	0.0901639	medium heterogeneity
Q86V81	THO complex subunit 4 (Tho4) (Ally of AML-1 and LEF-1) (Aly/REF export factor) (Transcriptional coactivator Aly/REF) (bZIP-enhancing factor BEF)	ALYREF	ALYREF ALY BEF THOC4	257	5	5.45834	0.00101274	0.000294203	0.000718537	0.000853978	0.000214012	0.00182579	0.000616956	0.196721	medium heterogeneity
Q9UHK6	Alpha-methylacyl-CoA racemase (EC 5.1.99.4) (2-methylacyl-CoA racemase)	AMACR	AMACR	382	4	5.22824	0.00385689	0.00140492	0.00245197	0.00178779	0.00305339	0.00264026	0.00295011	0.057377	medium heterogeneity
P02760	Protein AMBP [Cleaved into: Alpha-1-microglobulin (Protein HC) (Alpha-1 microglycoprotein) (Complex-forming glycoprotein heterogeneous in charge); Inter-alpha-trypsin inhibitor light chain (ITI-LC) (Bikunin) (EDC1) (HI-30) (Uronic-acid-rich protein); Trypstatin]	AMBP	AMBP HCP ITIL	352	4	5.2764	0.00468435	0.000878597	0.00380575	0.00612886	0.00141015	0.00402322	0.00206341	0.0300546	medium heterogeneity
Q9Y303	N-acetylglucosamine-6-phosphate deacetylase (GlcNAc 6-P deacetylase) (EC 3.5.1.25) (Amidohydrolase domain-containing protein 2)	AMDHD2	AMDHD2 CGI-14	409	2	5.44884	0.00453102	0.00160568	0.00292533	0.00142811	0.00228642	0.00933374	0.00404825	0.0409836	medium heterogeneity
Q9Y2J4	Angiomotin-like protein 2 (Leman coiled-coil protein) (LCCP)	AMOTL2	AMOTL2 KIAA0989	779	2	5.53056	0.00551707	0.000882637	0.00463443	0.00339093	0.00684556	0.00173152	0.00556705	0.0191257	medium heterogeneity
Q01433	AMP deaminase 2 (EC 3.5.4.6) (AMP deaminase isoform L)	AMPD2	AMPD2	879	3	5.14651	0.00202389	0.00108063	0.00094326	0.00164365	0.000154714	0.00120772	0.000417967	0.166667	medium heterogeneity
Q9H1A4	Anaphase-promoting complex subunit 1 (APC1) (Cyclosome subunit 1) (Mitotic checkpoint regulator) (Testis-specific gene 24 protein)	ANAPC1	ANAPC1 TSG24	1944	2	5.19286	0.00269808	0.00121933	0.00147876	0.0027113	0.000592467	0.000439987	0.000554347	0.103825	medium heterogeneity
Q5VTE6	Protein angel homolog 2	ANGEL2	ANGEL2 KIAA0759L	544	3	5.35495	0.00552913	0.00289722	0.00263191	0.00549087	0.000934114	-0.00085154	0.0004877	0.0491803	medium heterogeneity
Q9UKU9	Angiopoietin-related protein 2 (Angiopoietin-like protein 2)	ANGPTL2	ANGPTL2 ARP2 UNQ170/PRO196	493	2	5.31853	0.0116036	0.00316839	0.00843526	0.00278488	0.0175036	-0.00181865	0.012673	0.00273224	variable in ADCA
P16157	Ankyrin-1 (ANK-1) (Ankyrin-R) (Erythrocyte ankyrin)	ANK1	ANK1 ANK	1881	5	5.43963	0.00511626	0.000823035	0.00429322	0.00476084	0.0045638	0.00207863	0.00394251	0.0245902	medium heterogeneity
Q12955	Ankyrin-3 (ANK-3) (Ankyrin-G)	ANK3	ANK3	4377	6	4.71568	0.00345253	0.0022129	0.00123964	0.000814628	0.000751963	0.00397768	0.00155839	0.128415	medium heterogeneity
Q9P2R3	Rabankyrin-5 (Rank-5) (Ankyrin repeat and FYVE domain-containing protein 1) (Ankyrin repeats hooked to a zinc finger motif)	ANKFY1	ANKFY1 ANKHZN KIAA1255	1169	2	4.37569	0.00676286	0.00323165	0.00353121	0.00662803	0.0016532	-0.000125208	0.0012086	0.0355191	medium heterogeneity
Q8IWZ3	Ankyrin repeat and KH domain-containing protein 1 (HIV-1 Vpr-binding ankyrin repeat protein) (Multiple ankyrin repeats single KH domain) (hMASK)	ANKHD1	ANKHD1 KIAA1085 MASK VBARP PP2500	2542	3	5.4615	0.0129241	0.0115568	0.00136731	0.0024106	0.000482725	0.000891164	0.000584835	0.114754	medium heterogeneity
Q96NW4	Ankyrin repeat domain-containing protein 27 (VPS9 domain-containing protein)	ANKRD27	ANKRD27 PP12899	1050	2	5.8582	0.000812421	0.00046159	0.000350831	0.000190513	0.000604876	6.97e-05	0.00047107	0.306011	medium heterogeneity
O15084	Serine/threonine-protein phosphatase 6 regulatory ankyrin repeat subunit A (PP6-ARS-A) (Serine/threonine-protein phosphatase 6 regulatory subunit ARS-A) (Ankyrin repeat domain-containing protein 28) (Phosphatase interactor targeting protein hnRNP K) (PITK)	ANKRD28	ANKRD28 KIAA0379	1053	2	5.47974	0.017989	0.00804759	0.0099414	0.0162653	0.000516443	0.0192444	0.00519844	0.00273224	variable in BPH
Q9BXX3	Ankyrin repeat domain-containing protein 30A (Serologically defined breast cancer antigen NY-BR-1)	ANKRD30A	ANKRD30A	1397	2	4.98741	0.00375488	0.0035111	0.00024378	3.41e-06	0.000479286	0.000258362	0.000424055	0.360656	stable in BPH and ADCA
Q8NB46	Serine/threonine-protein phosphatase 6 regulatory ankyrin repeat subunit C (PP6-ARS-C) (Serine/threonine-protein phosphatase 6 regulatory subunit ARS-C) (Ankyrin repeat domain-containing protein 52)	ANKRD52	ANKRD52	1076	3	5.47404	0.0146203	0.00273687	0.0118834	0.00901341	0.0160594	0.00796553	0.0140359	0.00273224	variable in BPH and ADCA
Q92625	Ankyrin repeat and SAM domain-containing protein 1A (Odin)	ANKS1A	ANKS1A ANKS1 KIAA0229 ODIN	1134	2	6.41507	0.00985984	0.000273087	0.00958676	0.00800255	0.0131122	0.00376298	0.0107749	0.00273224	variable in BPH and ADCA
Q9NQW6	Anillin	ANLN	ANLN	1124	2	5.74617	0.00321275	0.000838486	0.00237426	0.000227183	0.00385305	0.00437912	0.00398457	0.057377	medium heterogeneity
Q92688	Acidic leucine-rich nuclear phosphoprotein 32 family member B (Acidic protein rich in leucines) (Putative HLA-DR-associated protein I-2) (PHAPI2) (Silver-stainable protein SSP29)	ANP32B	ANP32B APRIL PHAPI2	251	2	5.1028	0.0077217	0.00204038	0.00568132	0.00532723	0.00664453	0.00385397	0.00594689	0.010929	medium heterogeneity
P15144	Aminopeptidase N (AP-N) (hAPN) (EC 3.4.11.2) (Alanyl aminopeptidase) (Aminopeptidase M) (AP-M) (Microsomal aminopeptidase) (Myeloid plasma membrane glycoprotein CD13) (gp150) (CD antigen CD13)	ANPEP	ANPEP APN CD13 PEPN	967	40	5.38195	0.00570805	0.000476413	0.00523164	0.00148104	0.00184032	0.0266574	0.00804459	0.0136612	medium heterogeneity
P04083	Annexin A1 (Annexin I) (Annexin-1) (Calpactin II) (Calpactin-2) (Chromobindin-9) (Lipocortin I) (Phospholipase A2 inhibitory protein) (p35)	ANXA1	ANXA1 ANX1 LPC1	346	35	5.4635	0.0109246	0.000420159	0.0105045	0.0155355	0.00871838	0.000769713	0.00673121	0.00273224	variable in BPH
P50995	Annexin A11 (56 kDa autoantigen) (Annexin XI) (Annexin-11) (Calcyclin-associated annexin 50) (CAP-50)	ANXA11	ANXA11 ANX11	505	9	5.31214	0.0019683	0.000417917	0.00155038	0.00179167	0.00151449	0.000934194	0.00136942	0.0983607	medium heterogeneity
P07355	Annexin A2 (Annexin II) (Annexin-2) (Calpactin I heavy chain) (Calpactin-1 heavy chain) (Chromobindin-8) (Lipocortin II) (Placental anticoagulant protein IV) (PAP-IV) (Protein I) (p36)	ANXA2	ANXA2 ANX2 ANX2L4 CAL1H LPC2D	339	7	5.73308	0.00801467	0.00178979	0.00622488	0.0111358	0.00297022	0.00125611	0.00254169	0.00819672	variable in BPH
P12429	Annexin A3 (35-alpha calcimedin) (Annexin III) (Annexin-3) (Inositol 1,2-cyclic phosphate 2-phosphohydrolase) (Lipocortin III) (Placental anticoagulant protein III) (PAP-III)	ANXA3	ANXA3 ANX3	323	16	5.37271	0.00414902	0.000221963	0.00392706	0.0026577	0.00323156	0.0098216	0.00487907	0.0300546	medium heterogeneity
P09525	Annexin A4 (35-beta calcimedin) (Annexin IV) (Annexin-4) (Carbohydrate-binding protein p33/p41) (Chromobindin-4) (Endonexin I) (Lipocortin IV) (P32.5) (PP4-X) (Placental anticoagulant protein II) (PAP-II) (Protein II)	ANXA4	ANXA4 ANX4	319	15	5.34892	0.00113403	0.00044865	0.000685381	0.00111023	0.000512139	-6.94e-05	0.000366747	0.204918	medium heterogeneity
P08758	Annexin A5 (Anchorin CII) (Annexin V) (Annexin-5) (Calphobindin I) (CBP-I) (Endonexin II) (Lipocortin V) (Placental anticoagulant protein 4) (PP4) (Placental anticoagulant protein I) (PAP-I) (Thromboplastin inhibitor) (Vascular anticoagulant-alpha) (VAC-alpha)	ANXA5	ANXA5 ANX5 ENX2 PP4	320	8	5.73984	0.00595258	0.005346	0.000606572	0.00132127	0.000841544	-0.00224244	7.05e-05	0.218579	medium heterogeneity
P08133	Annexin A6 (67 kDa calelectrin) (Annexin VI) (Annexin-6) (Calphobindin-II) (CPB-II) (Chromobindin-20) (Lipocortin VI) (Protein III) (p68) (p70)	ANXA6	ANXA6 ANX6	673	27	5.52319	0.00171694	0.000481202	0.00123574	0.00101015	0.000805673	0.0032027	0.00140493	0.128415	medium heterogeneity
P20073	Annexin A7 (Annexin VII) (Annexin-7) (Synexin)	ANXA7	ANXA7 ANX7 SNX OK/SW-cl.95	488	6	5.4091	0.0028004	0.000449522	0.00235088	0.00367489	0.000835112	0.00292613	0.00135787	0.057377	medium heterogeneity
P19801	Amiloride-sensitive amine oxidase [copper-containing] (DAO) (Diamine oxidase) (EC 1.4.3.22) (Amiloride-binding protein 1) (Amine oxidase copper domain-containing protein 1) (Histaminase) (Kidney amine oxidase) (KAO)	AOC1	AOC1 ABP1 DAO1	751	6	5.35703	0.00375699	0.00133643	0.00242055	0.00441739	0.000498069	0.00219751	0.000922929	0.057377	medium heterogeneity
Q16853	Membrane primary amine oxidase (EC 1.4.3.21) (Copper amine oxidase) (HPAO) (Semicarbazide-sensitive amine oxidase) (SSAO) (Vascular adhesion protein 1) (VAP-1)	AOC3	AOC3 VAP1	763	6	5.21291	0.00384168	0.000424581	0.0034171	0.00340247	0.0025636	0.00602147	0.00342807	0.0409836	medium heterogeneity
Q06278	Aldehyde oxidase (EC 1.2.3.1) (Aldehyde oxidase 1) (Azaheterocycle hydroxylase) (EC 1.17.3.-)	AOX1	AOX1 AO	1338	3	5.57531	0.0124909	0.000533821	0.011957	0.0199261	0.00368407	0.0128689	0.00598027	0.00273224	variable in BPH
Q10567	AP-1 complex subunit beta-1 (Adaptor protein complex AP-1 subunit beta-1) (Adaptor-related protein complex 1 subunit beta-1) (Beta-1-adaptin) (Beta-adaptin 1) (Clathrin assembly protein complex 1 beta large chain) (Golgi adaptor HA1/AP1 adaptin beta subunit)	AP1B1	AP1B1 ADTB1 BAM22 CLAPB2	949	6	5.34967	0.00363422	0.00100272	0.0026315	0.00271217	0.00318486	0.000729405	0.00257099	0.0491803	medium heterogeneity
O43747	AP-1 complex subunit gamma-1 (Adaptor protein complex AP-1 subunit gamma-1) (Adaptor-related protein complex 1 subunit gamma-1) (Clathrin assembly protein complex 1 gamma-1 large chain) (Gamma1-adaptin) (Golgi adaptor HA1/AP1 adaptin subunit gamma-1)	AP1G1	AP1G1 ADTG CLAPG1	822	4	4.79056	0.00465117	0.00277786	0.00187331	0.000736541	0.00120142	0.00729932	0.00272589	0.0765027	medium heterogeneity
Q9BXS5	AP-1 complex subunit mu-1 (AP-mu chain family member mu1A) (Adaptor protein complex AP-1 subunit mu-1) (Adaptor-related protein complex 1 subunit mu-1) (Clathrin assembly protein complex 1 mu-1 medium chain 1) (Clathrin coat assembly protein AP47) (Clathrin coat-associated protein AP47) (Golgi adaptor HA1/AP1 adaptin mu-1 subunit) (Mu-adaptin 1) (Mu1A-adaptin)	AP1M1	AP1M1 CLTNM	423	3	5.17362	0.0112774	0.00212636	0.00915109	0.0148113	0.00586549	0.0020273	0.00490594	0.00273224	variable in BPH
Q9Y6Q5	AP-1 complex subunit mu-2 (AP-mu chain family member mu1B) (Adaptor protein complex AP-1 subunit mu-2) (Adaptor-related protein complex 1 subunit mu-2) (Clathrin assembly protein complex 1 mu-2 medium chain 2) (Golgi adaptor HA1/AP1 adaptin mu-2 subunit) (Mu-adaptin 2) (Mu1B-adaptin)	AP1M2	AP1M2	423	3	4.71187	0.00886572	0.00494144	0.00392429	0.00744095	0.000380297	0.00400627	0.00128679	0.0300546	medium heterogeneity
O95782	AP-2 complex subunit alpha-1 (100 kDa coated vesicle protein A) (Adaptor protein complex AP-2 subunit alpha-1) (Adaptor-related protein complex 2 subunit alpha-1) (Alpha-adaptin A) (Alpha1-adaptin) (Clathrin assembly protein complex 2 alpha-A large chain) (Plasma membrane adaptor HA2/AP2 adaptin alpha A subunit)	AP2A1	AP2A1 ADTAA CLAPA1	977	5	5.59172	0.00704451	0.000691441	0.00635307	0.00675563	0.00413617	0.0117961	0.00605115	0.00819672	variable in BPH and ADCA
O94973	AP-2 complex subunit alpha-2 (100 kDa coated vesicle protein C) (Adaptor protein complex AP-2 subunit alpha-2) (Adaptor-related protein complex 2 subunit alpha-2) (Alpha-adaptin C) (Alpha2-adaptin) (Clathrin assembly protein complex 2 alpha-C large chain) (Huntingtin yeast partner J) (Huntingtin-interacting protein 9) (HIP-9) (Huntingtin-interacting protein J) (Plasma membrane adaptor HA2/AP2 ada…	AP2A2	AP2A2 ADTAB CLAPA2 HIP9 HYPJ KIAA0899	939	4	4.77788	0.00588666	0.00210467	0.00378199	0.00279394	0.00458926	0.0043243	0.00452302	0.0300546	medium heterogeneity
P63010	AP-2 complex subunit beta (AP105B) (Adaptor protein complex AP-2 subunit beta) (Adaptor-related protein complex 2 subunit beta) (Beta-2-adaptin) (Beta-adaptin) (Clathrin assembly protein complex 2 beta large chain) (Plasma membrane adaptor HA2/AP2 adaptin beta subunit)	AP2B1	AP2B1 ADTB2 CLAPB1	937	8	5.06695	0.00214219	0.00148993	0.000652264	0.000308813	0.00119533	5.34e-05	0.000909853	0.20765	medium heterogeneity
Q96CW1	AP-2 complex subunit mu (AP-2 mu chain) (Adaptin-mu2) (Adaptor protein complex AP-2 subunit mu) (Adaptor-related protein complex 2 subunit mu) (Clathrin assembly protein complex 2 mu medium chain) (Clathrin coat assembly protein AP50) (Clathrin coat-associated protein AP50) (HA2 50 kDa subunit) (Plasma membrane adaptor AP-2 50 kDa protein)	AP2M1	AP2M1 CLAPM1 KIAA0109	435	2	5.06322	0.00217824	0.000876528	0.00130171	0.00231237	6.85e-05	0.00196947	0.000543717	0.128415	medium heterogeneity
O00203	AP-3 complex subunit beta-1 (Adaptor protein complex AP-3 subunit beta-1) (Adaptor-related protein complex 3 subunit beta-1) (Beta-3A-adaptin) (Clathrin assembly protein complex 3 beta-1 large chain)	AP3B1	AP3B1 ADTB3A	1094	3	5.2484	0.00344844	0.00207065	0.00137779	-0.000179796	0.00382078	-0.00127841	0.00254598	0.114754	medium heterogeneity
O14617	AP-3 complex subunit delta-1 (AP-3 complex subunit delta) (Adaptor-related protein complex 3 subunit delta-1) (Delta-adaptin)	AP3D1	AP3D1 PRO0039	1153	3	4.81593	0.00841928	0.00271954	0.00569974	0.012307	0.000877048	0.000346079	0.000744306	0.010929	medium heterogeneity
Q9Y2T2	AP-3 complex subunit mu-1 (AP-3 adaptor complex mu3A subunit) (Adaptor-related protein complex 3 subunit mu-1) (Mu-adaptin 3A) (Mu3A-adaptin)	AP3M1	AP3M1	418	3	5.36023	0.00303259	0.0022412	0.000791384	-0.0012903	-4.91e-05	0.00955788	0.00235265	0.185792	medium heterogeneity
Q7Z5R6	Amyloid beta A4 precursor protein-binding family B member 1-interacting protein (APBB1-interacting protein 1) (Proline-rich EVH1 ligand 1) (PREL-1) (Proline-rich protein 73) (Rap1-GTP-interacting adapter molecule) (RIAM) (Retinoic acid-responsive proline-rich protein 1) (RARP-1)	APBB1IP	APBB1IP PREL1 RARP1 RIAM	666	2	6.04386	0.00436158	0.00107531	0.00328627	0.00407825	0.002928	0.00198511	0.00269228	0.0409836	medium heterogeneity
P25054	Adenomatous polyposis coli protein (Protein APC) (Deleted in polyposis 2.5)	APC	APC DP2.5	2843	2	5.06722	0.0102519	0.00347424	0.00677764	0.00773839	0.00773674	0.00101809	0.00605708	0.00819672	variable in BPH and ADCA
P02743	Serum amyloid P-component (SAP) (9.5S alpha-1-glycoprotein) [Cleaved into: Serum amyloid P-component(1-203)]	APCS	APCS PTX2	223	12	5.60636	0.0377903	0.000633926	0.0371564	0.0465954	0.0391882	0.00274367	0.0300771	0.00273224	variable in BPH and ADCA
P13798	Acylamino-acid-releasing enzyme (AARE) (EC 3.4.19.1) (Acyl-peptide hydrolase) (APH) (Acylaminoacyl-peptidase) (Oxidized protein hydrolase) (OPH)	APEH	APEH D3F15S2 D3S48E DNF15S2	732	5	5.11805	0.00219436	0.00127304	0.000921321	0.000511835	0.00110438	0.0016006	0.00122843	0.172131	medium heterogeneity
P27695	DNA-(apurinic or apyrimidinic site) lyase (EC 3.1.-.-) (EC 4.2.99.18) (APEX nuclease) (APEN) (Apurinic-apyrimidinic endonuclease 1) (AP endonuclease 1) (APE-1) (REF-1) (Redox factor-1) [Cleaved into: DNA-(apurinic or apyrimidinic site) lyase, mitochondrial]	APEX1	APEX1 APE APE1 APEX APX HAP1 REF1	318	9	5.484	0.00183921	0.00045336	0.00138585	0.00188653	0.000477976	0.0026074	0.00101033	0.114754	medium heterogeneity
Q9BZZ5	Apoptosis inhibitor 5 (API-5) (Antiapoptosis clone 11 protein) (AAC-11) (Cell migration-inducing gene 8 protein) (Fibroblast growth factor 2-interacting factor) (FIF) (Protein XAGL)	API5	API5 MIG8	524	3	5.03182	0.00334967	0.00130958	0.00204009	0.00484589	-0.000435073	0.0010482	-6.43e-05	0.068306	medium heterogeneity
Q96GX9	Methylthioribulose-1-phosphate dehydratase (MTRu-1-P dehydratase) (EC 4.2.1.109) (APAF1-interacting protein) (hAPIP)	APIP	APIP CGI-29	242	2	5.40554	0.0113937	0.00200563	0.00938804	0.0180784	0.00141338	0.00724089	0.00287026	0.00273224	variable in BPH
Q9HDC9	Adipocyte plasma membrane-associated protein (Protein BSCv)	APMAP	APMAP C20orf3 UNQ1869/PRO4305	416	9	5.22731	0.00216865	0.00023568	0.00193297	0.003309	0.000915012	0.000858723	0.00090094	0.0765027	medium heterogeneity
P02647	Apolipoprotein A-I (Apo-AI) (ApoA-I) (Apolipoprotein A1) [Cleaved into: Proapolipoprotein A-I (ProapoA-I); Truncated apolipoprotein A-I (Apolipoprotein A-I(1-242))]	APOA1	APOA1	267	23	5.91452	0.00909945	0.000343204	0.00875625	0.00504352	0.00776505	0.022868	0.0115408	0.00273224	variable in ADCA
P06727	Apolipoprotein A-IV (Apo-AIV) (ApoA-IV) (Apolipoprotein A4)	APOA4	APOA4	396	9	5.27441	0.0022734	0.000512802	0.0017606	0.00100248	0.00198511	0.00336138	0.00232918	0.0874317	medium heterogeneity
P04114	Apolipoprotein B-100 (Apo B-100) [Cleaved into: Apolipoprotein B-48 (Apo B-48)]	APOB	APOB	4563	8	5.87069	0.00762706	0.000688031	0.00693903	0.0122457	0.0025336	0.00423524	0.00295901	0.00546448	variable in BPH
Q0VD83	Apolipoprotein B receptor (Apolipoprotein B-100 receptor) (Apolipoprotein B-48 receptor) (Apolipoprotein B48 receptor) (apoB-48R)	APOBR	APOBR APOB48R	1088	5	6.06089	0.00837056	0.000549491	0.00782107	0.0142696	0.00243911	0.00462123	0.00298464	0.00273224	variable in BPH
P02654	Apolipoprotein C-I (Apo-CI) (ApoC-I) (Apolipoprotein C1) [Cleaved into: Truncated apolipoprotein C-I]	APOC1	APOC1	83	3	5.75343	0.00883788	0.00253398	0.00630391	0.00520084	0.00769254	0.00544719	0.0071312	0.00819672	variable in BPH and ADCA
P02656	Apolipoprotein C-III (Apo-CIII) (ApoC-III) (Apolipoprotein C3)	APOC3	APOC3	99	2	5.08076	0.00711629	0.00218635	0.00492994	0.00791544	0.00294481	0.00192883	0.00269082	0.0191257	medium heterogeneity
P55056	Apolipoprotein C-IV (Apo-CIV) (ApoC-IV) (Apolipoprotein C4)	APOC4	APOC4	127	2	6.25145	0.00811168	0.00263508	0.0054766	0.0117191	0.000695686	0.00109188	0.000794735	0.010929	medium heterogeneity
P05090	Apolipoprotein D (Apo-D) (ApoD)	APOD	APOD	189	3	5.69413	0.0126843	0.000751774	0.0119325	0.0092321	0.0156227	0.00896347	0.0139579	0.00273224	variable in BPH and ADCA
P02649	Apolipoprotein E (Apo-E)	APOE	APOE	317	13	5.1275	0.00540626	0.000671157	0.0047351	0.00431433	0.00660549	0.000386279	0.00505069	0.0191257	medium heterogeneity
P02749	Beta-2-glycoprotein 1 (APC inhibitor) (Activated protein C-binding protein) (Anticardiolipin cofactor) (Apolipoprotein H) (Apo-H) (Beta-2-glycoprotein I) (B2GPI) (Beta(2)GPI)	APOH	APOH B2G1	345	7	5.16538	0.00554444	0.00211756	0.00342688	0.00238036	0.0024754	0.00942086	0.00421177	0.0409836	medium heterogeneity
O14791	Apolipoprotein L1 (Apolipoprotein L) (Apo-L) (ApoL) (Apolipoprotein L-I) (ApoL-I)	APOL1	APOL1 APOL	398	2	5.27658	0.0255265	0.00415411	0.0213724	0.033059	0.0124882	0.0129648	0.0126074	0.00273224	variable in BPH
Q9BQE5	Apolipoprotein L2 (Apolipoprotein L-II) (ApoL-II)	APOL2	APOL2	337	2	4.17292	0.00558234	0.00360095	0.00198139	-0.000658854	0.00228794	0.00898245	0.00396157	0.0710383	medium heterogeneity
Q9BUR5	MICOS complex subunit MIC26 (Apolipoprotein O) (MICOS complex subunit MIC23) (Protein FAM121B)	APOO	APOO FAM121B MIC23 MIC26 My025 UNQ1866/PRO4302	198	2	5.79288	0.0102773	0.00682366	0.00345368	0.00454039	0.00154779	0.00591122	0.00263865	0.0409836	medium heterogeneity
Q6UXV4	MICOS complex subunit MIC27 (Apolipoprotein O-like) (Protein FAM121A)	APOOL	APOOL CXorf33 FAM121A MIC27 UNQ8193/PRO23204	268	2	5.10094	0.0110586	0.00260974	0.0084489	0.00905621	0.0111667	-0.0015265	0.00799342	0.00273224	variable in BPH and ADCA
Q9UKG1	DCC-interacting protein 13-alpha (Dip13-alpha) (Adapter protein containing PH domain, PTB domain and leucine zipper motif 1)	APPL1	APPL1 APPL DIP13A KIAA1428	709	4	5.33312	0.00107857	0.000887201	0.000191368	-0.000230838	0.00057896	0.000295207	0.000508022	0.393443	stable in BPH and ADCA
Q8NEU8	DCC-interacting protein 13-beta (Dip13-beta) (Adapter protein containing PH domain, PTB domain and leucine zipper motif 2)	APPL2	APPL2 DIP13B	664	8	5.37783	0.00100851	0.000673948	0.000334562	0.0010137	-0.000147602	-0.000256362	-0.000174792	0.31694	medium heterogeneity
P07741	Adenine phosphoribosyltransferase (APRT) (EC 2.4.2.7)	APRT	APRT	180	6	5.38728	0.00356216	0.000267643	0.00329452	0.0015006	0.00349646	0.00807046	0.00463996	0.0409836	medium heterogeneity
O60306	Intron-binding protein aquarius (Intron-binding protein of 160 kDa) (IBP160)	AQR	AQR KIAA0560	1485	2	5.4727	0.0082556	0.00307946	0.00517614	0.00820838	0.00374553	0.000371259	0.00290197	0.0163934	medium heterogeneity
P10398	Serine/threonine-protein kinase A-Raf (EC 2.7.11.1) (Proto-oncogene A-Raf) (Proto-oncogene A-Raf-1) (Proto-oncogene Pks)	ARAF	ARAF ARAF1 PKS PKS2	606	3	6.23143	0.00163941	0.00101599	0.000623417	0.00107355	-0.000308549	0.00206892	0.000285819	0.213115	medium heterogeneity
P48444	Coatomer subunit delta (Archain) (Delta-coat protein) (Delta-COP)	ARCN1	ARCN1 COPD	511	12	5.19749	0.00184585	0.000353007	0.00149284	0.00181662	0.000850755	0.00244777	0.00125001	0.103825	medium heterogeneity
P18085	ADP-ribosylation factor 4	ARF4	ARF4 ARF2	180	5	5.67179	0.0131286	0.000841926	0.0122866	0.0198494	0.00291391	0.0177166	0.00661458	0.00273224	variable in BPH
P84085	ADP-ribosylation factor 5	ARF5	ARF5	180	3	5.7986	0.00986732	0.000658999	0.00920832	0.0105535	0.00959441	0.00401455	0.00819944	0.00273224	variable in BPH and ADCA
P62330	ADP-ribosylation factor 6	ARF6	ARF6	175	3	5.27077	0.00249196	0.00114705	0.00134491	0.000995801	0.00234305	-0.000602169	0.00160674	0.117486	medium heterogeneity
Q8N6H7	ADP-ribosylation factor GTPase-activating protein 2 (ARF GAP 2) (GTPase-activating protein ZNF289) (Zinc finger protein 289)	ARFGAP2	ARFGAP2 ZNF289 Nbla10535	521	3	5.48451	0.00472873	0.00037521	0.00435352	0.0070245	0.00220834	0.0027761	0.00235028	0.0191257	medium heterogeneity
Q9NP61	ADP-ribosylation factor GTPase-activating protein 3 (ARF GAP 3)	ARFGAP3	ARFGAP3 ARFGAP1	516	3	4.92918	0.00449414	0.0043574	0.000136742	0.00171771	-0.00152192	0.000369822	-0.00104899	0.420765	stable in BPH and ADCA
Q9Y6D6	Brefeldin A-inhibited guanine nucleotide-exchange protein 1 (Brefeldin A-inhibited GEP 1) (ADP-ribosylation factor guanine nucleotide-exchange factor 1) (p200 ARF guanine nucleotide exchange factor) (p200 ARF-GEP1)	ARFGEF1	ARFGEF1 ARFGEP1 BIG1	1849	2	5.18207	0.00238567	0.00065077	0.0017349	0.00210834	0.00121615	0.00217081	0.00145482	0.0874317	medium heterogeneity
Q9Y6D5	Brefeldin A-inhibited guanine nucleotide-exchange protein 2 (Brefeldin A-inhibited GEP 2) (ADP-ribosylation factor guanine nucleotide-exchange factor 2)	ARFGEF2	ARFGEF2 ARFGEP2 BIG2	1785	3	4.90634	0.00743501	0.00291493	0.00452008	0.00270949	0.00668439	0.00345894	0.00587803	0.0191257	medium heterogeneity
Q5TH69	Brefeldin A-inhibited guanine nucleotide-exchange protein 3 (ARFGEF family member 3)	ARFGEF3	ARFGEF3 BIG3 C6orf92 KIAA1244	2177	2	4.48405	0.0119273	0.00626242	0.00566492	0.0132512	-0.000289215	0.000768553	-2.48e-05	0.010929	medium heterogeneity
P53367	Arfaptin-1 (ADP-ribosylation factor-interacting protein 1)	ARFIP1	ARFIP1	373	5	5.01349	0.00245935	0.00090204	0.0015573	0.00201256	0.000735763	0.00265616	0.00121586	0.0983607	medium heterogeneity
P78540	Arginase-2, mitochondrial (EC 3.5.3.1) (Arginase II) (Kidney-type arginase) (Non-hepatic arginase) (Type II arginase)	ARG2	ARG2	354	14	5.18275	0.00569776	0.000306876	0.00539088	0.00322518	0.00530569	0.0121435	0.00701516	0.0136612	medium heterogeneity
Q07960	Rho GTPase-activating protein 1 (CDC42 GTPase-activating protein) (GTPase-activating protein rhoGAP) (Rho-related small GTPase protein activator) (Rho-type GTPase-activating protein 1) (p50-RhoGAP)	ARHGAP1	ARHGAP1 CDC42GAP RHOGAP1	439	9	5.19741	0.00188357	0.00137578	0.000507786	0.000802	0.000334852	0.000143947	0.000287126	0.23224	medium heterogeneity
Q68EM7	Rho GTPase-activating protein 17 (Rho-type GTPase-activating protein 17) (RhoGAP interacting with CIP4 homologs protein 1) (RICH-1)	ARHGAP17	ARHGAP17 RICH1 MSTP066 MSTP110	881	3	5.1118	0.00983153	0.00720222	0.00262931	0.00452056	0.00204774	-0.00129973	0.00121088	0.0491803	medium heterogeneity
Q8N392	Rho GTPase-activating protein 18 (MacGAP) (Rho-type GTPase-activating protein 18)	ARHGAP18	ARHGAP18	663	2	5.08006	0.00505129	0.00390121	0.00115008	0.000311256	0.00237635	-1.22e-05	0.00177921	0.13388	medium heterogeneity
Q5T5U3	Rho GTPase-activating protein 21 (Rho GTPase-activating protein 10) (Rho-type GTPase-activating protein 21)	ARHGAP21	ARHGAP21 ARHGAP10 KIAA1424	1957	4	5.45692	0.00555857	0.00322689	0.00233168	0.00305525	0.00124764	0.00341309	0.001789	0.057377	medium heterogeneity
Q6ZUM4	Rho GTPase-activating protein 27 (CIN85-associated multi-domain-containing Rho GTPase-activating protein 1) (Rho-type GTPase-activating protein 27) (SH3 domain-containing protein 20)	ARHGAP27	ARHGAP27 CAMGAP1 SH3D20 PP905	889	3	5.77146	0.014317	0.00088307	0.0134339	0.0235651	0.00417432	0.0108192	0.00583554	0.00273224	variable in BPH
A7KAX9	Rho GTPase-activating protein 32 (Brain-specific Rho GTPase-activating protein) (GAB-associated Cdc42/Rac GTPase-activating protein) (GC-GAP) (GTPase regulator interacting with TrkA) (Rho-type GTPase-activating protein 32) (Rho/Cdc42/Rac GTPase-activating protein RICS) (RhoGAP involved in the beta-catenin-N-cadherin and NMDA receptor signaling) (p200RhoGAP) (p250GAP)	ARHGAP32	ARHGAP32 GRIT KIAA0712 RICS	2087	2	5.31039	0.00417824	0.000542305	0.00363594	0.00547396	0.00203838	0.00291455	0.00225742	0.0327869	medium heterogeneity
Q9NRY4	Rho GTPase-activating protein 35 (Glucocorticoid receptor DNA-binding factor 1) (Glucocorticoid receptor repression factor 1) (GRF-1) (Rho GAP p190A) (p190-A)	ARHGAP35	ARHGAP35 GRF1 GRLF1 KIAA1722 P190A p190ARHOGAP	1499	3	5.00093	0.0101608	0.00372729	0.00643354	0.00633259	0.00750023	0.00353636	0.00650926	0.00819672	variable in BPH and ADCA
P98171	Rho GTPase-activating protein 4 (Rho-GAP hematopoietic protein C1) (Rho-type GTPase-activating protein 4) (p115)	ARHGAP4	ARHGAP4 KIAA0131 RGC1 RHOGAP4	946	2	5.33361	0.01419	0.00183721	0.0123528	0.0133917	0.00798787	0.022331	0.0115737	0.00273224	variable in BPH and ADCA
Q13017	Rho GTPase-activating protein 5 (Rho-type GTPase-activating protein 5) (p190-B)	ARHGAP5	ARHGAP5 RHOGAP5	1502	2	5.41447	0.00719453	0.000620359	0.00657417	0.00735891	0.00321025	0.0143117	0.00598561	0.00819672	variable in BPH and ADCA
O43182	Rho GTPase-activating protein 6 (Rho-type GTPase-activating protein 6) (Rho-type GTPase-activating protein RhoGAPX-1)	ARHGAP6	ARHGAP6 RHOGAP6	974	4	5.27256	0.00620303	0.00237278	0.00383024	0.00661676	0.000814325	0.00451847	0.00174036	0.0300546	medium heterogeneity
P52565	Rho GDP-dissociation inhibitor 1 (Rho GDI 1) (Rho-GDI alpha)	ARHGDIA	ARHGDIA GDIA1	204	6	5.47595	0.00265424	0.00165215	0.0010021	0.000605994	0.000823462	0.00272631	0.00129917	0.161202	medium heterogeneity
P52566	Rho GDP-dissociation inhibitor 2 (Rho GDI 2) (Ly-GDI) (Rho-GDI beta)	ARHGDIB	ARHGDIB GDIA2 GDID4 RAP1GN1	201	4	4.98137	0.00577751	0.00205638	0.00372113	0.00535309	0.00212953	0.0036001	0.00249717	0.0300546	medium heterogeneity
Q92888	Rho guanine nucleotide exchange factor 1 (115 kDa guanine nucleotide exchange factor) (p115-RhoGEF) (p115RhoGEF) (Sub1.5)	ARHGEF1	ARHGEF1	912	2	5.69831	0.00661855	0.00314562	0.00347293	0.00333709	0.000832325	0.0118023	0.00357482	0.0382514	medium heterogeneity
Q9HCE6	Rho guanine nucleotide exchange factor 10-like protein (GrinchGEF)	ARHGEF10L	ARHGEF10L GRINCHGEF KIAA1626	1279	2	5.46115	0.00165091	0.000597941	0.00105297	0.0005047	0.000891323	0.00318269	0.00146417	0.147541	medium heterogeneity
Q5VV41	Rho guanine nucleotide exchange factor 16 (Ephexin-4)	ARHGEF16	ARHGEF16 EPHEXIN4 NBR	709	3	5.85147	0.00294072	0.000964411	0.00197631	0.00305235	0.0012239	0.00100543	0.00116928	0.0710383	medium heterogeneity
Q96PE2	Rho guanine nucleotide exchange factor 17 (164 kDa Rho-specific guanine-nucleotide exchange factor) (p164-RhoGEF) (p164RhoGEF) (Tumor endothelial marker 4)	ARHGEF17	ARHGEF17 KIAA0337 TEM4	2063	3	5.29285	0.00288781	0.00138398	0.00150383	0.00160953	0.000312626	0.00476033	0.00142455	0.103825	medium heterogeneity
Q6ZSZ5	Rho guanine nucleotide exchange factor 18 (114 kDa Rho-specific guanine nucleotide exchange factor) (p114-Rho-GEF) (p114RhoGEF) (Septin-associated RhoGEF) (SA-RhoGEF)	ARHGEF18	ARHGEF18 KIAA0521	1173	2	5.27162	0.00312282	0.00141334	0.00170948	0.000553836	0.00354701	-0.000336216	0.00257621	0.0874317	medium heterogeneity
Q14155	Rho guanine nucleotide exchange factor 7 (Beta-Pix) (COOL-1) (PAK-interacting exchange factor beta) (p85)	ARHGEF7	ARHGEF7 COOL1 KIAA0142 P85SPR PAK3BP PIXB Nbla10314	803	2	5.02178	0.00710558	0.00173419	0.0053714	0.00275959	0.00853047	0.00372958	0.00733025	0.0136612	medium heterogeneity
O14497	AT-rich interactive domain-containing protein 1A (ARID domain-containing protein 1A) (B120) (BRG1-associated factor 250) (BAF250) (BRG1-associated factor 250a) (BAF250A) (Osa homolog 1) (hOSA1) (SWI-like protein) (SWI/SNF complex protein p270) (SWI/SNF-related, matrix-associated, actin-dependent regulator of chromatin subfamily F member 1) (hELD)	ARID1A	ARID1A BAF250 BAF250A C1orf4 OSA1 SMARCF1	2285	2	5.15901	0.007967	0.00259336	0.00537365	0.00825643	0.0026933	0.00476636	0.00321156	0.0136612	medium heterogeneity
Q9Y4X5	E3 ubiquitin-protein ligase ARIH1 (EC 2.3.2.27) (H7-AP2) (HHARI) (Monocyte protein 6) (MOP-6) (Protein ariadne-1 homolog) (ARI-1) (UbcH7-binding protein) (UbcM4-interacting protein) (Ubiquitin-conjugating enzyme E2-binding protein 1)	ARIH1	ARIH1 ARI MOP6 UBCH7BP HUSSY-27	557	2	5.88339	0.00478249	0.00255007	0.00223243	0.00388257	0.00128492	0.000124521	0.000994821	0.0601093	medium heterogeneity
P40616	ADP-ribosylation factor-like protein 1	ARL1	ARL1	181	2	5.47425	0.00561967	0.00243649	0.00318318	0.00239998	7.45e-05	0.0148589	0.00377059	0.0409836	medium heterogeneity
O75915	PRA1 family protein 3 (ADP-ribosylation factor-like protein 6-interacting protein 5) (ARL-6-interacting protein 5) (Aip-5) (Cytoskeleton-related vitamin A-responsive protein) (Dermal papilla-derived protein 11) (GTRAP3-18) (Glutamate transporter EAAC1-interacting protein) (JM5) (Prenylated Rab acceptor protein 2) (Protein JWa) (Putative MAPK-activating protein PM27)	ARL6IP5	ARL6IP5 DERP11 JWA PRA2 PRAF3 HSPC127	188	3	5.40049	0.00784025	0.00173497	0.00610528	0.00711879	0.00322646	0.0117012	0.00534515	0.00819672	variable in BPH and ADCA
Q9NVJ2	ADP-ribosylation factor-like protein 8B (ADP-ribosylation factor-like protein 10C) (Novel small G protein indispensable for equal chromosome segregation 1)	ARL8B	ARL8B ARL10C GIE1	186	3	4.83903	0.00458472	0.00292694	0.00165779	-0.0013517	0.00183048	0.0101682	0.0039149	0.0901639	medium heterogeneity
Q8N2F6	Armadillo repeat-containing protein 10 (Splicing variant involved in hepatocarcinogenesis protein)	ARMC10	ARMC10 SVH PSEC0198	343	2	4.93363	0.00644256	0.00422753	0.00221503	0.00353437	0.0020356	-0.0012047	0.00122553	0.0601093	medium heterogeneity
Q96C12	Armadillo repeat-containing protein 5	ARMC5	ARMC5	935	4	5.67614	0.00952477	0.000638344	0.00888643	0.0150507	0.00379919	0.00565547	0.00426326	0.00273224	variable in BPH
Q9UH62	Armadillo repeat-containing X-linked protein 3 (ARM protein lost in epithelial cancers on chromosome X 3) (Protein ALEX3)	ARMCX3	ARMCX3 ALEX3 BM-017 UNQ2517/PRO6007	379	2	5.71125	0.010466	0.00265948	0.00780648	0.0131291	0.00262973	0.00736874	0.00381448	0.00273224	variable in BPH
Q9H993	Protein-glutamate O-methyltransferase (EC 2.1.1.-) (Acidic residue methyltransferase 1)	ARMT1	ARMT1 C6orf211	441	2	5.46469	0.0116192	0.00607757	0.00554167	0.00499556	0.00725345	0.00204468	0.00595126	0.010929	medium heterogeneity
P27540	Aryl hydrocarbon receptor nuclear translocator (ARNT protein) (Class E basic helix-loop-helix protein 2) (bHLHe2) (Dioxin receptor, nuclear translocator) (Hypoxia-inducible factor 1-beta) (HIF-1-beta) (HIF1-beta)	ARNT	ARNT BHLHE2	789	2	6.07536	0.00640299	0.00066491	0.00573808	0.00666419	0.00435795	0.00710017	0.0050435	0.010929	medium heterogeneity
Q92747	Actin-related protein 2/3 complex subunit 1A (SOP2-like protein)	ARPC1A	ARPC1A SOP2L	370	3	5.44761	0.0112101	0.00196053	0.00924955	0.00628601	0.013467	0.00548789	0.0114722	0.00273224	variable in BPH and ADCA
O15143	Actin-related protein 2/3 complex subunit 1B (Arp2/3 complex 41 kDa subunit) (p41-ARC)	ARPC1B	ARPC1B ARC41	372	4	5.23063	0.00216806	0.00116488	0.00100317	0.000129685	0.00186944	0.00102484	0.00165829	0.161202	medium heterogeneity
O15144	Actin-related protein 2/3 complex subunit 2 (Arp2/3 complex 34 kDa subunit) (p34-ARC)	ARPC2	ARPC2 ARC34 PRO2446	300	7	5.35477	0.00172906	0.000353939	0.00137512	0.002922	0.000168945	0.000353	0.000214959	0.114754	medium heterogeneity
O15145	Actin-related protein 2/3 complex subunit 3 (Arp2/3 complex 21 kDa subunit) (p21-ARC)	ARPC3	ARPC3 ARC21	178	8	5.17915	0.00212143	0.00104936	0.00107207	0.000919122	0.000638306	0.00283221	0.00118678	0.144809	medium heterogeneity
P59998	Actin-related protein 2/3 complex subunit 4 (Arp2/3 complex 20 kDa subunit) (p20-ARC)	ARPC4	ARPC4 ARC20	168	4	5.43259	0.00192183	0.000440219	0.00148161	0.00224038	0.000150504	0.00319862	0.000912532	0.103825	medium heterogeneity
O15511	Actin-related protein 2/3 complex subunit 5 (Arp2/3 complex 16 kDa subunit) (p16-ARC)	ARPC5	ARPC5 ARC16	151	2	5.5912	0.00234213	0.000817506	0.00152462	0.00230249	0.00129707	-0.000126344	0.00094122	0.101093	medium heterogeneity
Q9BPX5	Actin-related protein 2/3 complex subunit 5-like protein (Arp2/3 complex 16 kDa subunit 2) (ARC16-2)	ARPC5L	ARPC5L	153	3	5.41257	0.00429716	0.00198564	0.00231152	0.00178407	0.000134154	0.010426	0.0027071	0.057377	medium heterogeneity
P49407	Beta-arrestin-1 (Arrestin beta-1) (Non-visual arrestin-2)	ARRB1	ARRB1 ARR1	418	4	5.37954	0.00426641	0.000598328	0.00366808	0.00124292	0.00529027	0.00607694	0.00548694	0.0327869	medium heterogeneity
P15289	Arylsulfatase A (ASA) (EC 3.1.6.8) (Cerebroside-sulfatase) [Cleaved into: Arylsulfatase A component B; Arylsulfatase A component C]	ARSA	ARSA	507	5	4.58945	0.00342002	0.00235756	0.00106246	8.02e-05	0.000502852	0.00568814	0.00179917	0.147541	medium heterogeneity
Q13510	Acid ceramidase (AC) (ACDase) (Acid CDase) (EC 3.5.1.23) (Acylsphingosine deacylase) (N-acylsphingosine amidohydrolase) (Putative 32 kDa heart protein) (PHP32) [Cleaved into: Acid ceramidase subunit alpha; Acid ceramidase subunit beta]	ASAH1	ASAH1 ASAH HSD-33 HSD33	395	14	5.43107	0.0132264	0.0013388	0.0118876	0.0171292	0.00414183	0.0193998	0.00795632	0.00273224	variable in BPH
Q9ULH1	Arf-GAP with SH3 domain, ANK repeat and PH domain-containing protein 1 (130 kDa phosphatidylinositol 4,5-bisphosphate-dependent ARF1 GTPase-activating protein) (ADP-ribosylation factor-directed GTPase-activating protein 1) (ARF GTPase-activating protein 1) (Development and differentiation-enhancing factor 1) (DEF-1) (Differentiation-enhancing factor 1) (PIP2-dependent ARF1 GAP)	ASAP1	ASAP1 DDEF1 KIAA1249	1129	3	5.0949	0.0111102	0.000832013	0.0102782	0.0130485	0.0056139	0.01596	0.00820043	0.00273224	variable in BPH and ADCA
Q9H1I8	Activating signal cointegrator 1 complex subunit 2 (ASC-1 complex subunit p100) (Trip4 complex subunit p100)	ASCC2	ASCC2 ASC1P100	757	2	5.49659	0.0013666	0.000597553	0.000769047	0.00125447	-6.64e-05	0.00181923	0.000404982	0.188525	medium heterogeneity
Q8N3C0	Activating signal cointegrator 1 complex subunit 3 (EC 3.6.4.12) (ASC-1 complex subunit p200) (ASC1p200) (Helicase, ATP binding 1) (Trip4 complex subunit p200)	ASCC3	ASCC3 HELIC1	2202	4	5.13647	0.00653017	0.00256611	0.00396406	0.00421107	0.00416729	0.00261335	0.0037788	0.0300546	medium heterogeneity
Q9UBL3	Set1/Ash2 histone methyltransferase complex subunit ASH2 (ASH2-like protein)	ASH2L	ASH2L ASH2L1	628	2	5.58649	0.00343818	0.00237898	0.0010592	0.00331514	-0.00035589	-0.00146336	-0.000632757	0.147541	medium heterogeneity
P04424	Argininosuccinate lyase (ASAL) (EC 4.3.2.1) (Arginosuccinase)	ASL	ASL	464	4	5.46669	0.00181436	0.00105799	0.000756368	0.00126345	0.000467832	0.000100712	0.000376052	0.191257	medium heterogeneity
O95671	N-acetylserotonin O-methyltransferase-like protein (ASMTL) (EC 2.1.1.-)	ASMTL	ASMTL	621	2	5.30616	0.0092057	0.00320519	0.00600051	0.00877419	0.000540093	0.0140607	0.00392025	0.00819672	variable in BPH
O43681	ATPase ASNA1 (EC 3.6.-.-) (Arsenical pump-driving ATPase) (Arsenite-stimulated ATPase) (Transmembrane domain recognition complex 40 kDa ATPase subunit) (hARSA-I) (hASNA-I)	ASNA1	ASNA1 ARSA TRC40	348	3	5.18953	0.00163483	0.000611675	0.00102316	0.00161498	0.000375917	0.0011894	0.000579287	0.153005	medium heterogeneity
P08243	Asparagine synthetase [glutamine-hydrolyzing] (EC 6.3.5.4) (Cell cycle control protein TS11) (Glutamine-dependent asparagine synthetase)	ASNS	ASNS TS11	561	2	5.81211	0.00462114	0.000210629	0.00441051	0.00310409	0.00566572	0.00456419	0.00539033	0.0191257	medium heterogeneity
Q12797	Aspartyl/asparaginyl beta-hydroxylase (EC 1.14.11.16) (Aspartate beta-hydroxylase) (ASP beta-hydroxylase) (Peptide-aspartate beta-dioxygenase)	ASPH	ASPH BAH	758	3	5.75891	0.00420082	0.00214626	0.00205456	0.00367544	0.000639199	0.00143802	0.000838904	0.068306	medium heterogeneity
Q9BXN1	Asporin (Periodontal ligament-associated protein 1) (PLAP-1)	ASPN	ASPN PLAP1 SLRR1C UNQ215/PRO241	380	11	5.2256	0.00498532	0.000421355	0.00456397	0.000260147	0.0103674	6.51e-05	0.00779184	0.0191257	medium heterogeneity
Q9BZE9	Tether containing UBX domain for GLUT4 (Alveolar soft part sarcoma chromosomal region candidate gene 1 protein) (Alveolar soft part sarcoma locus) (Renal papillary cell carcinoma protein 17) (UBX domain-containing protein 9)	ASPSCR1	ASPSCR1 ASPL RCC17 TUG UBXD9 UBXN9	553	2	3.93915	0.0297816	0.00650936	0.0232722	0.0179244	0.0336673	0.0081301	0.027283	0.00273224	variable in BPH and ADCA
P00966	Argininosuccinate synthase (EC 6.3.4.5) (Citrulline--aspartate ligase)	ASS1	ASS1 ASS	412	8	4.93916	0.00775013	0.00128781	0.00646232	0.0113459	0.00325335	0.00143837	0.00279961	0.00819672	variable in BPH
Q9ULI0	ATPase family AAA domain-containing protein 2B	ATAD2B	ATAD2B KIAA1240	1458	2	5.70871	0.00535883	0.00177639	0.00358244	0.00582212	0.00199191	0.00163499	0.00190268	0.0355191	medium heterogeneity
Q9Y4P1	Cysteine protease ATG4B (EC 3.4.22.-) (AUT-like 1 cysteine endopeptidase) (Autophagin-1) (Autophagy-related cysteine endopeptidase 1) (Autophagy-related protein 4 homolog B) (hAPG4B)	ATG4B	ATG4B APG4B AUTL1 KIAA0943	393	2	5.74101	0.00272646	0.00171247	0.00101399	0.00311294	-0.000417928	-0.000987092	-0.000560219	0.155738	medium heterogeneity
O95352	Ubiquitin-like modifier-activating enzyme ATG7 (ATG12-activating enzyme E1 ATG7) (Autophagy-related protein 7) (APG7-like) (hAGP7) (Ubiquitin-activating enzyme E1-like protein)	ATG7	ATG7 APG7L	703	2	5.43077	0.00613661	0.00199396	0.00414265	0.00715701	0.000440354	0.00620643	0.00188187	0.0245902	medium heterogeneity
P31939	Bifunctional purine biosynthesis protein PURH [Cleaved into: Bifunctional purine biosynthesis protein PURH, N-terminally processed] [Includes: Phosphoribosylaminoimidazolecarboxamide formyltransferase (EC 2.1.2.3) (5-aminoimidazole-4-carboxamide ribonucleotide formyltransferase) (AICAR transformylase); IMP cyclohydrolase (EC 3.5.4.10) (ATIC) (IMP synthase) (Inosinicase)]	ATIC	ATIC PURH OK/SW-cl.86	592	11	5.19702	0.00103823	0.000157097	0.000881137	0.000584839	0.000798049	0.00201929	0.00110336	0.177596	medium heterogeneity
O00244	Copper transport protein ATOX1 (Metal transport protein ATX1)	ATOX1	ATOX1 HAH1	68	2	5.25601	0.00417993	0.00322746	0.000952475	-0.000608883	0.00300671	-0.000526141	0.00212349	0.166667	medium heterogeneity
Q9HD20	Manganese-transporting ATPase 13A1 (EC 3.6.3.-)	ATP13A1	ATP13A1 ATP13A KIAA1825 CGI-152	1204	2	5.55389	0.00340521	0.000356411	0.0030488	0.00253557	0.00183924	0.00821721	0.00343373	0.0409836	medium heterogeneity
Q9H7F0	Probable cation-transporting ATPase 13A3 (EC 3.6.3.-) (ATPase family homolog up-regulated in senescence cells 1)	ATP13A3	ATP13A3 AFURS1	1226	3	5.85854	0.00551499	0.000542823	0.00497217	0.0042605	0.00567088	0.00501105	0.00550593	0.0191257	medium heterogeneity
P05023	Sodium/potassium-transporting ATPase subunit alpha-1 (Na(+)/K(+) ATPase alpha-1 subunit) (EC 3.6.3.9) (Sodium pump subunit alpha-1)	ATP1A1	ATP1A1	1023	8	5.13105	0.00471209	0.000851203	0.00386088	0.00299174	0.00477331	0.00373102	0.00451274	0.0300546	medium heterogeneity
P05026	Sodium/potassium-transporting ATPase subunit beta-1 (Sodium/potassium-dependent ATPase subunit beta-1)	ATP1B1	ATP1B1 ATP1B	303	3	4.70175	0.00676307	0.00569562	0.00106745	0.00364922	-0.00245524	0.00389019	-0.000868881	0.144809	medium heterogeneity
P54709	Sodium/potassium-transporting ATPase subunit beta-3 (Sodium/potassium-dependent ATPase subunit beta-3) (ATPB-3) (CD antigen CD298)	ATP1B3	ATP1B3	279	2	5.23189	0.00343167	0.00147244	0.00195923	0.0010981	0.00151254	0.00588268	0.00260508	0.0737705	medium heterogeneity
P16615	Sarcoplasmic/endoplasmic reticulum calcium ATPase 2 (SERCA2) (SR Ca(2+)-ATPase 2) (EC 3.6.3.8) (Calcium pump 2) (Calcium-transporting ATPase sarcoplasmic reticulum type, slow twitch skeletal muscle isoform) (Endoplasmic reticulum class 1/2 Ca(2+) ATPase)	ATP2A2	ATP2A2 ATP2B	1042	3	5.71017	0.00514213	0.00114459	0.00399754	0.00499858	0.00260069	0.00518502	0.00324677	0.0300546	medium heterogeneity
Q93084	Sarcoplasmic/endoplasmic reticulum calcium ATPase 3 (SERCA3) (SR Ca(2+)-ATPase 3) (EC 3.6.3.8) (Calcium pump 3)	ATP2A3	ATP2A3	1043	2	5.45003	0.0123372	0.00876131	0.00357591	-0.00197288	0.00467249	0.0169326	0.00773751	0.0355191	medium heterogeneity
P23634	Plasma membrane calcium-transporting ATPase 4 (PMCA4) (EC 3.6.3.8) (Matrix-remodeling-associated protein 1) (Plasma membrane calcium ATPase isoform 4) (Plasma membrane calcium pump isoform 4)	ATP2B4	ATP2B4 ATP2B2 MXRA1	1241	2	5.41653	0.00212918	0.00148605	0.000643132	-6.8e-05	0.00048242	0.00325881	0.00117652	0.210383	medium heterogeneity
P98194	Calcium-transporting ATPase type 2C member 1 (ATPase 2C1) (EC 3.6.3.8) (ATP-dependent Ca(2+) pump PMR1)	ATP2C1	ATP2C1 KIAA1347 PMR1L HUSSY-28	919	4	4.48755	0.012298	0.00439088	0.00790714	0.00950718	0.00755933	0.00415046	0.00670712	0.00273224	variable in BPH and ADCA
P25705	ATP synthase subunit alpha, mitochondrial	ATP5A1	ATP5A1 ATP5A ATP5AL2 ATPM	553	24	5.76622	0.00652564	0.000322593	0.00620305	0.00788769	0.00360279	0.00894986	0.00493956	0.00819672	variable in BPH and ADCA
P06576	ATP synthase subunit beta, mitochondrial (EC 3.6.3.14)	ATP5B	ATP5B ATPMB ATPSB	529	27	5.75097	0.00591045	0.000459056	0.00545139	0.00671594	0.00450717	0.00449042	0.00450298	0.010929	medium heterogeneity
P36542	ATP synthase subunit gamma, mitochondrial (F-ATPase gamma subunit)	ATP5C1	ATP5C1 ATP5C ATP5CL1	298	8	5.11541	0.00235992	0.00035075	0.00200917	0.00286789	0.000433908	0.00415881	0.00136513	0.0710383	medium heterogeneity
P30049	ATP synthase subunit delta, mitochondrial (F-ATPase delta subunit)	ATP5D	ATP5D	168	4	5.2035	0.00370196	0.00288411	0.000817843	0.000813685	0.00153007	-0.00130635	0.000820961	0.185792	medium heterogeneity
P24539	ATP synthase F(0) complex subunit B1, mitochondrial (ATP synthase proton-transporting mitochondrial F(0) complex subunit B1) (ATP synthase subunit b) (ATPase subunit b)	ATP5F1	ATP5F1	256	6	5.36971	0.00239507	0.000595185	0.00179989	0.00331942	0.000357501	0.00156845	0.000660238	0.0846995	medium heterogeneity
P56385	ATP synthase subunit e, mitochondrial (ATPase subunit e) [Cleaved into: ATP synthase subunit e, mitochondrial, N-terminally processed]	ATP5I	ATP5I ATP5K	69	6	5.29242	0.00241172	0.000609567	0.00180215	0.00321009	0.000932997	0.000185819	0.000746202	0.0846995	medium heterogeneity
P18859	ATP synthase-coupling factor 6, mitochondrial (ATPase subunit F6)	ATP5J	ATP5J ATP5A ATPM	108	3	5.45363	0.00375098	0.00140956	0.00234142	0.0017535	0.00224858	0.00438372	0.00278236	0.057377	medium heterogeneity
P56134	ATP synthase subunit f, mitochondrial	ATP5J2	ATP5J2 ATP5JL	94	2	5.36959	0.00980363	0.0053006	0.00450303	0.00773526	-0.000338428	0.00933074	0.00207886	0.0191257	medium heterogeneity
O75964	ATP synthase subunit g, mitochondrial (ATPase subunit g)	ATP5L	ATP5L	103	2	5.59366	0.00613833	0.00138231	0.00475602	0.00720597	0.000912752	0.00893597	0.00291856	0.0191257	medium heterogeneity
P48047	ATP synthase subunit O, mitochondrial (Oligomycin sensitivity conferral protein) (OSCP)	ATP5O	ATP5O ATPO	213	8	5.52737	0.00472334	0.000237629	0.00448572	0.00776314	0.00118332	0.00456062	0.00202765	0.0191257	medium heterogeneity
Q15904	V-type proton ATPase subunit S1 (V-ATPase subunit S1) (Protein XAP-3) (V-ATPase Ac45 subunit) (V-ATPase S1 accessory protein) (Vacuolar proton pump subunit S1)	ATP6AP1	ATP6AP1 ATP6IP1 ATP6S1 VATPS1 XAP3	470	3	5.00551	0.0072323	0.00204813	0.00518417	0.00315197	0.00390034	0.0151323	0.00670832	0.0163934	medium heterogeneity
Q93050	V-type proton ATPase 116 kDa subunit a isoform 1 (V-ATPase 116 kDa isoform a1) (Clathrin-coated vesicle/synaptic vesicle proton pump 116 kDa subunit) (Vacuolar adenosine triphosphatase subunit Ac116) (Vacuolar proton pump subunit 1) (Vacuolar proton translocating ATPase 116 kDa subunit a isoform 1)	ATP6V0A1	ATP6V0A1 ATP6N1 ATP6N1A VPP1	837	2	5.62773	0.00536802	0.00473917	0.000628849	0.00167425	-1.33e-05	-0.000581012	-0.0001552	0.213115	medium heterogeneity
Q9HBG4	V-type proton ATPase 116 kDa subunit a isoform 4 (V-ATPase 116 kDa isoform a4) (Vacuolar proton translocating ATPase 116 kDa subunit a isoform 4) (Vacuolar proton translocating ATPase 116 kDa subunit a kidney isoform)	ATP6V0A4	ATP6V0A4 ATP6N1B ATP6N2	840	2	5.36856	0.00189939	0.00136402	0.000535368	0.000794026	0.000401062	0.000162311	0.000341374	0.226776	medium heterogeneity
P61421	V-type proton ATPase subunit d 1 (V-ATPase subunit d 1) (32 kDa accessory protein) (V-ATPase 40 kDa accessory protein) (V-ATPase AC39 subunit) (p39) (Vacuolar proton pump subunit d 1)	ATP6V0D1	ATP6V0D1 ATP6D VPATPD	351	2	4.9487	0.00513119	0.000476912	0.00465428	0.00780396	0.000645469	0.00723167	0.00229202	0.0191257	medium heterogeneity
Q8N8Y2	V-type proton ATPase subunit d 2 (V-ATPase subunit d 2) (Vacuolar proton pump subunit d 2)	ATP6V0D2	ATP6V0D2	350	2	5.85536	0.0098868	0.000708769	0.00917803	0.0165406	0.00260463	0.00681054	0.0036561	0.00273224	variable in BPH
P38606	V-type proton ATPase catalytic subunit A (V-ATPase subunit A) (EC 3.6.3.14) (V-ATPase 69 kDa subunit) (Vacuolar ATPase isoform VA68) (Vacuolar proton pump subunit alpha)	ATP6V1A	ATP6V1A ATP6A1 ATP6V1A1 VPP2	617	9	4.94262	0.00214815	0.00118754	0.00096061	0.00180937	-9.97e-05	0.00159523	0.000324038	0.166667	medium heterogeneity
P15313	V-type proton ATPase subunit B, kidney isoform (V-ATPase subunit B 1) (Endomembrane proton pump 58 kDa subunit) (Vacuolar proton pump subunit B 1)	ATP6V1B1	ATP6V1B1 ATP6B1 VATB VPP3	513	3	5.67824	0.00297521	0.000471446	0.00250376	0.00473241	0.000687849	0.00126553	0.00083227	0.0546448	medium heterogeneity
P21281	V-type proton ATPase subunit B, brain isoform (V-ATPase subunit B 2) (Endomembrane proton pump 58 kDa subunit) (HO57) (Vacuolar proton pump subunit B 2)	ATP6V1B2	ATP6V1B2 ATP6B2 VPP3	511	6	5.35219	0.00274387	0.000326582	0.00241729	0.00283749	0.0015345	0.00380506	0.00210215	0.057377	medium heterogeneity
P21283	V-type proton ATPase subunit C 1 (V-ATPase subunit C 1) (Vacuolar proton pump subunit C 1)	ATP6V1C1	ATP6V1C1 ATP6C ATP6D VATC	382	3	5.12784	0.00612902	0.00263376	0.00349527	0.00472572	0.00379022	-0.00108097	0.00257242	0.0382514	medium heterogeneity
P36543	V-type proton ATPase subunit E 1 (V-ATPase subunit E 1) (V-ATPase 31 kDa subunit) (p31) (Vacuolar proton pump subunit E 1)	ATP6V1E1	ATP6V1E1 ATP6E ATP6E2	226	5	5.67869	0.0121467	0.00083028	0.0113164	0.0126455	0.0139247	-0.000495859	0.0103196	0.00273224	variable in BPH and ADCA
Q16864	V-type proton ATPase subunit F (V-ATPase subunit F) (V-ATPase 14 kDa subunit) (Vacuolar proton pump subunit F)	ATP6V1F	ATP6V1F ATP6S14 VATF	119	2	3.98972	0.0104298	0.00757298	0.00285686	-0.0028434	0.00318691	0.0189675	0.00713205	0.0409836	medium heterogeneity
O75348	V-type proton ATPase subunit G 1 (V-ATPase subunit G 1) (V-ATPase 13 kDa subunit 1) (Vacuolar proton pump subunit G 1) (Vacuolar proton pump subunit M16)	ATP6V1G1	ATP6V1G1 ATP6G ATP6G1 ATP6J	118	4	5.52237	0.00828342	0.00500259	0.00328084	0.00488	0.00239849	0.00113039	0.00208147	0.0409836	medium heterogeneity
Q9UI12	V-type proton ATPase subunit H (V-ATPase subunit H) (Nef-binding protein 1) (NBP1) (Protein VMA13 homolog) (V-ATPase 50/57 kDa subunits) (Vacuolar proton pump subunit H) (Vacuolar proton pump subunit SFD)	ATP6V1H	ATP6V1H CGI-11	483	3	5.03376	0.00664299	0.00258892	0.00405407	0.00111729	0.00417272	0.0125084	0.00625665	0.0273224	medium heterogeneity
Q13535	Serine/threonine-protein kinase ATR (EC 2.7.11.1) (Ataxia telangiectasia and Rad3-related protein) (FRAP-related protein 1)	ATR	ATR FRP1	2644	2	4.8901	0.0792116	0.0148649	0.0643467	0.0156334	0.0978544	0.109964	0.100882	0	variable in ADCA
P46100	Transcriptional regulator ATRX (EC 3.6.4.12) (ATP-dependent helicase ATRX) (X-linked helicase II) (X-linked nuclear protein) (XNP) (Znf-HX)	ATRX	ATRX RAD54L XH2	2492	2	5.54599	0.00649422	0.00282052	0.0036737	0.00196888	0.00459298	0.00603028	0.00495231	0.0327869	medium heterogeneity
Q9UBB4	Ataxin-10 (Brain protein E46 homolog) (Spinocerebellar ataxia type 10 protein)	ATXN10	ATXN10 SCA10	475	2	5.3241	0.00131308	0.000279117	0.00103396	0.000688138	0.00137731	0.00104142	0.00129334	0.150273	medium heterogeneity
P0C7T5	Ataxin-1-like (Brother of ataxin-1) (Brother of ATXN1)	ATXN1L	ATXN1L BOAT BOAT1	689	3	5.61325	0.011209	0.000271527	0.0109375	0.0148588	0.00505407	0.0168238	0.00799651	0.00273224	variable in BPH and ADCA
Q8WWM7	Ataxin-2-like protein (Ataxin-2 domain protein) (Ataxin-2-related protein)	ATXN2L	ATXN2L A2D A2LG A2LP A2RP	1075	5	5.5137	0.00148791	0.000834925	0.000652981	0.000726104	0.000566061	0.00069437	0.000598138	0.20765	medium heterogeneity
Q13825	Methylglutaconyl-CoA hydratase, mitochondrial (EC 4.2.1.18) (AU-specific RNA-binding enoyl-CoA hydratase) (AU-binding protein/enoyl-CoA hydratase) (Itaconyl-CoA hydratase) (EC 4.2.1.56)	AUH	AUH	339	2	5.18843	0.00428308	0.00330799	0.000975098	0.00195081	0.000975526	-0.00195333	0.000243311	0.166667	medium heterogeneity
O14965	Aurora kinase A (EC 2.7.11.1) (Aurora 2) (Aurora/IPL1-related kinase 1) (ARK-1) (Aurora-related kinase 1) (hARK1) (Breast tumor-amplified kinase) (Serine/threonine-protein kinase 15) (Serine/threonine-protein kinase 6) (Serine/threonine-protein kinase aurora-A)	AURKA	AURKA AIK AIRK1 ARK1 AURA AYK1 BTAK IAK1 STK15 STK6	403	2	6.05082	0.00967303	0.000755235	0.0089178	0.00784005	0.0110927	0.00562632	0.00972611	0.00273224	variable in BPH and ADCA
Q8NBF6	Late secretory pathway protein AVL9 homolog	AVL9	AVL9 KIAA0241	648	2	5.80239	0.00196208	0.000485063	0.00147701	0.00178924	0.00130344	0.00106106	0.00124285	0.103825	medium heterogeneity
P25311	Zinc-alpha-2-glycoprotein (Zn-alpha-2-GP) (Zn-alpha-2-glycoprotein)	AZGP1	AZGP1 ZAG ZNGP1	298	16	5.71876	0.0192162	0.00109699	0.0181192	0.0163139	0.00261606	0.0700449	0.0194733	0.00273224	variable in BPH and ADCA
P61769	Beta-2-microglobulin [Cleaved into: Beta-2-microglobulin form pI 5.3]	B2M	B2M CDABP0092 HDCMA22P	119	4	4.99851	0.102314	0.0103503	0.0919636	0.193786	0.0231485	-0.00705858	0.0155967	0	variable in BPH
Q9NXR7	BRISC and BRCA1-A complex member 2 (BRCA1-A complex subunit BRE) (BRCA1/BRCA2-containing complex subunit 45) (Brain and reproductive organ-expressed protein)	BABAM2	BABAM2 BRCC45 BRE	383	2	5.43193	0.00330885	0.00225136	0.00105749	-0.000114703	0.00204545	0.0016102	0.00193664	0.147541	medium heterogeneity
Q99933	BAG family molecular chaperone regulator 1 (BAG-1) (Bcl-2-associated athanogene 1)	BAG1	BAG1 HAP	345	2	5.60822	0.00345003	0.00165912	0.00179091	4.17e-05	0.00372029	0.00125032	0.0031028	0.0874317	medium heterogeneity
O95816	BAG family molecular chaperone regulator 2 (BAG-2) (Bcl-2-associated athanogene 2)	BAG2	BAG2	211	3	5.14245	0.00272755	0.000529134	0.00219842	0.00402875	0.000203552	0.00269199	0.000825662	0.0601093	medium heterogeneity
O95817	BAG family molecular chaperone regulator 3 (BAG-3) (Bcl-2-associated athanogene 3) (Bcl-2-binding protein Bis) (Docking protein CAIR-1)	BAG3	BAG3 BIS	575	3	5.76038	0.00305062	0.000476012	0.00257461	0.00435357	0.00125633	0.00119258	0.00124039	0.0519126	medium heterogeneity
Q9UL15	BAG family molecular chaperone regulator 5 (BAG-5) (Bcl-2-associated athanogene 5)	BAG5	BAG5 KIAA0873	447	3	4.29432	0.00736546	0.00227702	0.00508843	0.00629996	0.00362272	0.005851	0.00417979	0.0163934	medium heterogeneity
P46379	Large proline-rich protein BAG6 (BAG family molecular chaperone regulator 6) (BCL2-associated athanogene 6) (BAG-6) (HLA-B-associated transcript 3) (Protein G3) (Protein Scythe)	BAG6	BAG6 BAT3 G3	1132	2	5.48644	0.00404133	0.000909238	0.00313209	0.00497046	0.00134372	0.00298209	0.00175331	0.0409836	medium heterogeneity
Q9UQB8	Brain-specific angiogenesis inhibitor 1-associated protein 2 (BAI-associated protein 2) (BAI1-associated protein 2) (Protein BAP2) (Fas ligand-associated factor 3) (FLAF3) (Insulin receptor substrate p53/p58) (IRS-58) (IRSp53/58) (Insulin receptor substrate protein of 53 kDa) (IRSp53) (Insulin receptor substrate p53)	BAIAP2	BAIAP2	552	4	5.65327	0.00343603	0.000309479	0.00312655	0.00567452	0.00147483	0.000437822	0.00121557	0.0409836	medium heterogeneity
Q9UHR4	Brain-specific angiogenesis inhibitor 1-associated protein 2-like protein 1 (BAI1-associated protein 2-like protein 1) (Insulin receptor tyrosine kinase substrate)	BAIAP2L1	BAIAP2L1 IRTKS	511	3	5.55429	0.00669916	0.000251157	0.006448	0.0106691	0.00222205	0.00646272	0.00328221	0.00819672	variable in BPH
O75531	Barrier-to-autointegration factor (Breakpoint cluster region protein 1) [Cleaved into: Barrier-to-autointegration factor, N-terminally processed]	BANF1	BANF1 BAF BCRG1	89	5	5.35162	0.00208813	0.000758047	0.00133009	0.00137808	0.00161729	0.000324495	0.00129409	0.125683	medium heterogeneity
Q8IXM2	Chromatin complexes subunit BAP18 (BPTF-associated protein of 18 kDa)	BAP18	BAP18 C17orf49	172	2	5.81643	0.00806494	0.00555635	0.00250859	0.00390075	0.00240322	-0.00135176	0.00146447	0.0546448	medium heterogeneity
P80723	Brain acid soluble protein 1 (22 kDa neuronal tissue-enriched acidic protein) (Neuronal axonal membrane protein NAP-22)	BASP1	BASP1 NAP22	227	5	5.06146	0.00809452	0.00162151	0.00647301	0.0073075	0.00651411	0.00384627	0.00584715	0.00819672	variable in BPH and ADCA
Q9UIG0	Tyrosine-protein kinase BAZ1B (EC 2.7.10.2) (Bromodomain adjacent to zinc finger domain protein 1B) (Williams syndrome transcription factor) (Williams-Beuren syndrome chromosomal region 10 protein) (Williams-Beuren syndrome chromosomal region 9 protein) (hWALp2)	BAZ1B	BAZ1B WBSC10 WBSCR10 WBSCR9 WSTF	1483	2	5.94881	0.00545677	0.000541227	0.00491554	0.0081148	0.00169606	0.00497622	0.0025161	0.0191257	medium heterogeneity
O75936	Gamma-butyrobetaine dioxygenase (EC 1.14.11.1) (Gamma-butyrobetaine hydroxylase) (Gamma-BBH) (Gamma-butyrobetaine,2-oxoglutarate dioxygenase)	BBOX1	BBOX1 BBH BBOX	387	2	4.40052	0.0114523	0.00672842	0.00472385	0.00494543	0.0013208	0.0142683	0.00455767	0.0191257	medium heterogeneity
Q3SYG4	Protein PTHB1 (Bardet-Biedl syndrome 9 protein) (Parathyroid hormone-responsive B1 gene protein)	BBS9	BBS9 PTHB1	887	2	5.50847	0.00503001	0.000672923	0.00435709	0.00716305	0.000386987	0.00784951	0.00225262	0.0191257	medium heterogeneity
P50895	Basal cell adhesion molecule (Auberger B antigen) (B-CAM cell surface glycoprotein) (F8/G253 antigen) (Lutheran antigen) (Lutheran blood group glycoprotein) (CD antigen CD239)	BCAM	BCAM LU MSK19	628	3	5.35789	0.00516043	0.00314401	0.00201642	0.00145668	0.00356995	-0.000964927	0.00243623	0.0710383	medium heterogeneity
P51572	B-cell receptor-associated protein 31 (BCR-associated protein 31) (Bap31) (6C6-AG tumor-associated antigen) (Protein CDM) (p28)	BCAP31	BCAP31 BAP31 DXS1357E	246	2	4.91722	0.0129363	0.0118576	0.00107861	0.00195941	0.00154982	-0.0029774	0.000418017	0.144809	medium heterogeneity
O75363	Breast carcinoma-amplified sequence 1 (Amplified and overexpressed in breast cancer) (Novel amplified in breast cancer 1)	BCAS1	BCAS1 AIBC1 NABC1	584	3	5.32505	0.00160995	0.000472749	0.0011372	0.00151134	0.000912035	0.000690289	0.000856598	0.136612	medium heterogeneity
O75934	Pre-mRNA-splicing factor SPF27 (Breast carcinoma-amplified sequence 2) (DNA amplified in mammary carcinoma 1 protein) (Spliceosome-associated protein SPF 27)	BCAS2	BCAS2 DAM1	225	3	5.40958	0.00457672	0.00140614	0.00317058	0.0036909	0.00244181	0.0037959	0.00278033	0.0409836	medium heterogeneity
Q9H6U6	Breast carcinoma-amplified sequence 3 (GAOB1)	BCAS3	BCAS3	928	2	5.10406	0.00748062	0.00427737	0.00320326	0.000721621	0.00517601	0.00472991	0.00506448	0.0409836	medium heterogeneity
O15382	Branched-chain-amino-acid aminotransferase, mitochondrial (BCAT(m)) (EC 2.6.1.42) (Placental protein 18) (PP18)	BCAT2	BCAT2 BCATM BCT2 ECA40	392	4	5.25323	0.00585149	0.000744373	0.00510712	0.00712889	0.00250704	0.00684201	0.00359078	0.0163934	medium heterogeneity
P12694	2-oxoisovalerate dehydrogenase subunit alpha, mitochondrial (EC 1.2.4.4) (Branched-chain alpha-keto acid dehydrogenase E1 component alpha chain) (BCKDE1A) (BCKDH E1-alpha)	BCKDHA	BCKDHA	445	4	5.0006	0.00412272	0.00211279	0.00200993	0.00293192	0.000663027	0.00328465	0.00131843	0.0710383	medium heterogeneity
O14874	[3-methyl-2-oxobutanoate dehydrogenase [lipoamide]] kinase, mitochondrial (EC 2.7.11.4) (Branched-chain alpha-ketoacid dehydrogenase kinase) (BCKD-kinase) (BCKDHKIN)	BCKDK	BCKDK	412	3	4.6527	0.00773071	0.00276627	0.00496444	0.0102473	0.00164025	-0.000911492	0.00100232	0.0191257	medium heterogeneity
Q9BZR8	Apoptosis facilitator Bcl-2-like protein 14 (Bcl2-L-14) (Apoptosis regulator Bcl-G)	BCL2L14	BCL2L14 BCLG	327	2	5.27508	0.00832869	0.00107967	0.00724902	0.00760948	0.00451938	0.0143565	0.00697867	0.00273224	variable in BPH and ADCA
P11274	Breakpoint cluster region protein (EC 2.7.11.1) (Renal carcinoma antigen NY-REN-26)	BCR	BCR BCR1 D22S11	1271	3	5.70186	0.00412643	0.00123696	0.00288947	0.00462257	0.00186603	0.000760516	0.00158965	0.0409836	medium heterogeneity
Q9Y276	Mitochondrial chaperone BCS1 (h-BCS1) (BCS1-like protein)	BCS1L	BCS1L BCS1	419	3	5.14708	0.00365761	0.00180371	0.0018539	0.0012287	0.00234823	0.00224651	0.0023228	0.0819672	medium heterogeneity
Q02338	D-beta-hydroxybutyrate dehydrogenase, mitochondrial (EC 1.1.1.30) (3-hydroxybutyrate dehydrogenase) (BDH) (Short chain dehydrogenase/reductase family 9C member 1)	BDH1	BDH1 BDH SDR9C1	343	4	4.88664	0.00780178	0.00165948	0.00614231	0.00671961	0.00116266	0.0193493	0.00570933	0.00819672	variable in BPH and ADCA
Q9BUT1	3-hydroxybutyrate dehydrogenase type 2 (EC 1.1.1.-) (EC 1.1.1.30) (Dehydrogenase/reductase SDR family member 6) (Oxidoreductase UCPA) (R-beta-hydroxybutyrate dehydrogenase) (Short chain dehydrogenase/reductase family 15C member 1)	BDH2	BDH2 DHRS6 SDR15C1 UNQ6308/PRO20933	245	3	5.43402	0.0011398	0.000517724	0.00062208	0.000383866	0.000789711	0.000833827	0.00080074	0.213115	medium heterogeneity
P21810	Biglycan (Bone/cartilage proteoglycan I) (PG-S1)	BGN	BGN SLRR1A	368	21	5.72384	0.00653788	0.00043803	0.00609985	0.00450714	0.00801874	0.00512131	0.00729438	0.00819672	variable in BPH and ADCA
Q8TD16	Protein bicaudal D homolog 2 (Bic-D 2)	BICD2	BICD2 KIAA0699	824	3	5.60052	0.0133957	0.00156429	0.0118314	0.0210124	0.00273612	0.0115741	0.00494562	0.00273224	variable in BPH
A1A5D9	BICD family-like cargo adapter 2 (Bicaudal D-related protein 2) (BICD-related protein 2) (BICDR-2) (Coiled-coil domain-containing protein 64B)	BICDL2	BICDL2 BICDR2 CCDC64B	508	2	5.74365	0.0125693	0.000454471	0.0121148	0.019267	0.00673762	0.00678985	0.00675068	0.00273224	variable in BPH
Q9UBW5	Bridging integrator 2 (Breast cancer-associated protein 1)	BIN2	BIN2 BRAP1	565	3	5.69378	0.000508879	0.000231569	0.00027731	0.00026293	0.000333043	0.000153251	0.000288095	0.34153	stable in BPH and ADCA
Q9NR09	Baculoviral IAP repeat-containing protein 6 (EC 2.3.2.27) (BIR repeat-containing ubiquitin-conjugating enzyme) (BRUCE) (RING-type E3 ubiquitin transferase BIRC6) (Ubiquitin-conjugating BIR domain enzyme apollon) (APOLLON)	BIRC6	BIRC6 KIAA1289	4857	6	5.42528	0.00639022	0.00347007	0.00292015	0.00455484	0.00206087	0.000593928	0.00169413	0.0409836	medium heterogeneity
P54132	Bloom syndrome protein (EC 3.6.4.12) (DNA helicase, RecQ-like type 2) (RecQ2) (RecQ protein-like 3)	BLM	BLM RECQ2 RECQL3	1417	2	5.54935	0.00194041	0.00163827	0.000302139	0.000983842	-0.000353443	0.000223772	-0.000209139	0.333333	medium heterogeneity
Q13867	Bleomycin hydrolase (BH) (BLM hydrolase) (BMH) (EC 3.4.22.40)	BLMH	BLMH	455	2	5.52423	0.000979977	0.000483828	0.000496149	0.000530553	0.000585266	0.000125584	0.000470346	0.234973	medium heterogeneity
P30043	Flavin reductase (NADPH) (FR) (EC 1.5.1.30) (Biliverdin reductase B) (BVR-B) (EC 1.3.1.24) (Biliverdin-IX beta-reductase) (Green heme-binding protein) (GHBP) (NADPH-dependent diaphorase) (NADPH-flavin reductase) (FLR)	BLVRB	BLVRB FLR	206	10	5.56577	0.00406505	0.000141119	0.00392394	0.0051787	0.00307913	0.00269405	0.00298286	0.0300546	medium heterogeneity
Q14692	Ribosome biogenesis protein BMS1 homolog (Ribosome assembly protein BMS1 homolog)	BMS1	BMS1 BMS1L KIAA0187	1282	3	5.36263	0.00798824	0.00368403	0.00430421	0.00937337	-0.00108415	0.00526178	0.000502334	0.0218579	medium heterogeneity
P51813	Cytoplasmic tyrosine-protein kinase BMX (EC 2.7.10.2) (Bone marrow tyrosine kinase gene in chromosome X protein) (Epithelial and endothelial tyrosine kinase) (ETK) (NTK38)	BMX	BMX	675	3	5.8891	0.00780804	0.00036811	0.00743993	0.0146823	0.00201234	0.00199563	0.00200817	0.00273224	variable in BPH
Q9H3K6	BolA-like protein 2	BOLA2	BOLA2 BOLA2A My016; BOLA2B	86	3	5.94157	0.00893044	0.000494191	0.00843625	0.00762331	0.0105137	0.00464277	0.00904595	0.00273224	variable in BPH and ADCA
Q14137	Ribosome biogenesis protein BOP1 (Block of proliferation 1 protein)	BOP1	BOP1 KIAA0124	746	3	5.92509	0.00407866	0.00204273	0.00203593	0.00310394	0.00202715	-0.00114177	0.00123492	0.068306	medium heterogeneity
Q86WA6	Valacyclovir hydrolase (VACVase) (Valacyclovirase) (EC 3.1.-.-) (Biphenyl hydrolase-like protein) (Biphenyl hydrolase-related protein) (Bph-rp) (Breast epithelial mucin-associated antigen) (MCNAA)	BPHL	BPHL MCNAA	291	2	5.38511	0.0123176	0.000814697	0.0115029	0.0133053	0.0109837	0.00765338	0.0101511	0.00273224	variable in BPH and ADCA
P17213	Bactericidal permeability-increasing protein (BPI) (CAP 57)	BPI	BPI	487	3	5.16345	0.0063752	0.00375553	0.00261967	0.000116183	0.0053228	0.00202073	0.00449728	0.0519126	medium heterogeneity
Q8N4F0	BPI fold-containing family B member 2 (Bactericidal/permeability-increasing protein-like 1) (BPI-like 1) (Long palate, lung and nasal epithelium carcinoma-associated protein 2) (RYSR)	BPIFB2	BPIFB2 BPIL1 C20orf184 LPLUNC2 UNQ2489/PRO5776	458	2	5.6304	0.0021932	0.000913575	0.00127963	0.000877038	0.0018673	0.000724358	0.00158157	0.128415	medium heterogeneity
O95861	3'(2'),5'-bisphosphate nucleotidase 1 (EC 3.1.3.7) (Bisphosphate 3'-nucleotidase 1) (PAP-inositol 1,4-phosphatase) (PIP)	BPNT1	BPNT1	308	3	5.13596	0.0339999	0.00271477	0.0312852	0.0561149	0.00768547	0.0275953	0.0126629	0.00273224	variable in BPH
P15056	Serine/threonine-protein kinase B-raf (EC 2.7.11.1) (Proto-oncogene B-Raf) (p94) (v-Raf murine sarcoma viral oncogene homolog B1)	BRAF	BRAF BRAF1 RAFB1	766	2	5.44252	0.00551891	0.0023861	0.00313281	0.00458526	0.00324835	-0.00157115	0.00204347	0.0409836	medium heterogeneity
Q6PJG6	BRCA1-associated ATM activator 1 (BRCA1-associated protein required for ATM activation protein 1)	BRAT1	BRAT1 BAAT1 C7orf27	821	3	5.87047	0.00934035	0.00307559	0.00626476	0.00551785	0.00627903	0.00846267	0.00682494	0.00819672	variable in BPH and ADCA
P25440	Bromodomain-containing protein 2 (O27.1.1) (Really interesting new gene 3 protein)	BRD2	BRD2 KIAA9001 RING3	801	3	5.49651	0.00252806	0.00102971	0.00149836	0.00154903	0.00123037	0.0021503	0.00146035	0.103825	medium heterogeneity
Q5VW32	BRO1 domain-containing protein BROX (BRO1 domain- and CAAX motif-containing protein)	BROX	BROX BROFTI C1orf58	411	3	5.37744	0.00465126	0.00147734	0.00317391	0.00352755	0.00100749	0.00861227	0.00290868	0.0409836	medium heterogeneity
Q10588	ADP-ribosyl cyclase/cyclic ADP-ribose hydrolase 2 (EC 3.2.2.6) (ADP-ribosyl cyclase 2) (Bone marrow stromal antigen 1) (BST-1) (Cyclic ADP-ribose hydrolase 2) (cADPr hydrolase 2) (CD antigen CD157)	BST1	BST1	318	2	5.56609	0.0123478	0.00285663	0.00949114	0.00774844	0.0128349	0.00468801	0.0107982	0.00273224	variable in BPH and ADCA
O14981	TATA-binding protein-associated factor 172 (EC 3.6.4.-) (ATP-dependent helicase BTAF1) (B-TFIID transcription factor-associated 170 kDa subunit) (TAF(II)170) (TBP-associated factor 172) (TAF-172)	BTAF1	BTAF1 TAF172	1849	2	5.49136	0.00442799	0.000561322	0.00386667	0.00717214	0.000696382	0.00346113	0.00138757	0.0300546	medium heterogeneity
P43251	Biotinidase (Biotinase) (EC 3.5.1.12)	BTD	BTD	543	4	5.29977	0.00212463	0.00180923	0.000315398	-3.48e-05	0.000252547	0.00155454	0.000578045	0.327869	medium heterogeneity
P20290	Transcription factor BTF3 (Nascent polypeptide-associated complex subunit beta) (NAC-beta) (RNA polymerase B transcription factor 3)	BTF3	BTF3 NACB OK/SW-cl.8	206	3	5.42734	0.0084067	0.00184317	0.00656352	0.00489769	0.00846476	0.00585731	0.0078129	0.00819672	variable in BPH and ADCA
Q96K17	Transcription factor BTF3 homolog 4 (Basic transcription factor 3-like 4)	BTF3L4	BTF3L4	158	3	5.0342	0.00547249	0.000784815	0.00468767	0.00699547	0.00184551	0.00629075	0.00295682	0.0191257	medium heterogeneity
O60566	Mitotic checkpoint serine/threonine-protein kinase BUB1 beta (EC 2.7.11.1) (MAD3/BUB1-related protein kinase) (hBUBR1) (Mitotic checkpoint kinase MAD3L) (Protein SSK1)	BUB1B	BUB1B BUBR1 MAD3L SSK1	1050	3	5.37067	0.00408154	0.00169029	0.00239125	0.00081417	0.00272731	0.00611432	0.00357406	0.057377	medium heterogeneity
O43684	Mitotic checkpoint protein BUB3	BUB3	BUB3	328	5	4.88062	0.0040995	0.00182428	0.00227522	0.00174025	0.00388371	-0.000945345	0.00267644	0.0601093	medium heterogeneity
Q7L1Q6	Basic leucine zipper and W2 domain-containing protein 1 (Protein Orf)	BZW1	BZW1 BZAP45 KIAA0005	419	3	4.82047	0.00298037	0.0024708	0.000509568	0.00127963	0.000390445	-0.00144324	-6.8e-05	0.23224	medium heterogeneity
Q9Y6E2	Basic leucine zipper and W2 domain-containing protein 2	BZW2	BZW2 HSPC028 MSTP017	419	4	5.32726	0.00395021	0.000662413	0.0032878	0.00284529	0.00457534	0.000752688	0.00361968	0.0409836	medium heterogeneity
Q5T2E6	UPF0668 protein C10orf76	C10orf76	C10orf76	689	2	5.5052	0.0024142	0.00106621	0.00134799	0.00215942	0.000332659	0.00195969	0.000739416	0.117486	medium heterogeneity
Q9H0W9	Ester hydrolase C11orf54 (EC 3.1.-.-)	C11orf54	C11orf54 LP4947 PTD012	315	4	5.09648	0.00379946	0.0036974	0.000102055	-0.00111322	0.00186034	-0.00152697	0.00101351	0.448087	stable in BPH and ADCA
Q9H3H3	UPF0696 protein C11orf68 (Basophilic leukemia-expressed protein Bles03) (Protein p5326)	C11orf68	C11orf68 BLES03	251	2	5.68178	0.00233122	0.00178291	0.000548311	0.00177091	-0.000682494	0.000572938	-0.000368636	0.226776	medium heterogeneity
Q7Z3J2	UPF0505 protein C16orf62 (Esophageal cancer-associated protein)	C16orf62	C16orf62 101F10.2	963	2	5.70222	0.00405344	0.000974729	0.00307871	0.00308869	0.00174563	0.00704803	0.00307123	0.0409836	medium heterogeneity
Q6PH81	UPF0547 protein C16orf87	C16orf87	C16orf87	154	2	5.99139	0.0119152	0.00800044	0.00391471	0.00342637	0.00638742	-0.00203836	0.00428097	0.0300546	medium heterogeneity
P02746	Complement C1q subcomponent subunit B	C1QB	C1QB	253	4	5.43595	0.00230843	0.00214361	0.000164825	0.000874433	-0.000473812	-4.81e-05	-0.000367381	0.401639	stable in BPH and ADCA
Q07021	Complement component 1 Q subcomponent-binding protein, mitochondrial (ASF/SF2-associated protein p32) (Glycoprotein gC1qBP) (C1qBP) (Hyaluronan-binding protein 1) (Mitochondrial matrix protein p32) (gC1q-R protein) (p33)	C1QBP	C1QBP GC1QBP HABP1 SF2P32	282	5	5.15145	0.00364746	0.000940749	0.00270671	0.00466661	0.00138568	0.000790084	0.00123678	0.0437158	medium heterogeneity
P02747	Complement C1q subcomponent subunit C	C1QC	C1QC C1QG	245	2	5.62011	0.00593424	0.00127007	0.00466417	0.00758433	0.00247298	0.00247728	0.00247405	0.0191257	medium heterogeneity
P00736	Complement C1r subcomponent (EC 3.4.21.41) (Complement component 1 subcomponent r) [Cleaved into: Complement C1r subcomponent heavy chain; Complement C1r subcomponent light chain]	C1R	C1R	705	2	5.60943	0.00176893	0.000838944	0.000929987	0.00042827	0.00147799	0.000791112	0.00130627	0.166667	medium heterogeneity
P09871	Complement C1s subcomponent (EC 3.4.21.42) (C1 esterase) (Complement component 1 subcomponent s) [Cleaved into: Complement C1s subcomponent heavy chain; Complement C1s subcomponent light chain]	C1S	C1S	688	3	5.3185	0.00368038	0.00102544	0.00265494	0.00199599	0.0030179	0.0035429	0.00314915	0.0491803	medium heterogeneity
P06681	Complement C2 (EC 3.4.21.43) (C3/C5 convertase) [Cleaved into: Complement C2b fragment; Complement C2a fragment]	C2	C2	752	4	5.31733	0.00388273	0.00102802	0.00285471	0.00451925	0.00109551	0.00313872	0.00160632	0.0409836	medium heterogeneity
P30042	ES1 protein homolog, mitochondrial (Protein GT335) (Protein KNP-I)	C21orf33	C21orf33 HES1 KNPI	268	4	5.04291	0.00198337	0.00109722	0.000886151	0.0012736	0.000568548	0.000676624	0.000595567	0.177596	medium heterogeneity
P01024	Complement C3 (C3 and PZP-like alpha-2-macroglobulin domain-containing protein 1) [Cleaved into: Complement C3 beta chain; C3-beta-c (C3bc); Complement C3 alpha chain; C3a anaphylatoxin; Acylation stimulating protein (ASP) (C3adesArg); Complement C3b alpha' chain; Complement C3c alpha' chain fragment 1; Complement C3dg fragment; Complement C3g fragment; Complement C3d fragment; Complement C3f fra…	C3	C3 CPAMD1	1663	50	5.43165	0.00735703	0.000523454	0.00683357	0.00844674	0.00491599	0.00774684	0.0056237	0.00819672	variable in BPH and ADCA
P01031	Complement C5 (C3 and PZP-like alpha-2-macroglobulin domain-containing protein 4) [Cleaved into: Complement C5 beta chain; Complement C5 alpha chain; C5a anaphylatoxin; Complement C5 alpha' chain]	C5	C5 CPAMD4	1676	6	5.23457	0.00699686	0.000665258	0.0063316	0.0071988	0.00340999	0.0124948	0.0056812	0.00819672	variable in BPH and ADCA
P13671	Complement component C6	C6	C6	934	3	5.54617	0.00244889	0.001027	0.00142189	0.00247121	0.000712001	0.000403598	0.0006349	0.112022	medium heterogeneity
P10643	Complement component C7	C7	C7	843	2	5.29818	0.00760409	0.00139189	0.0062122	0.00511041	0.00547226	0.0117374	0.00703855	0.00819672	variable in BPH and ADCA
P07357	Complement component C8 alpha chain (Complement component 8 subunit alpha)	C8A	C8A	584	2	4.79488	0.0111233	0.00522567	0.00589762	0.00539306	0.00420937	0.0124761	0.00627605	0.00819672	variable in BPH and ADCA
P07358	Complement component C8 beta chain (Complement component 8 subunit beta)	C8B	C8B	591	2	5.68651	0.00593955	0.00136629	0.00457326	0.00906125	0.000727735	0.00264586	0.00120727	0.0191257	medium heterogeneity
P07360	Complement component C8 gamma chain	C8G	C8G	202	4	5.72837	0.00348132	0.000332613	0.00314871	0.00571696	0.000920461	0.00212872	0.00122253	0.0409836	medium heterogeneity
Q6P1X6	UPF0598 protein C8orf82	C8orf82	C8orf82	216	3	5.16069	0.00351593	0.00195916	0.00155677	0.00226639	0.00155651	-0.000571326	0.00102455	0.0983607	medium heterogeneity
P02748	Complement component C9 [Cleaved into: Complement component C9a; Complement component C9b]	C9	C9	559	2	5.37879	0.00225269	0.000342462	0.00191023	0.00109005	0.00229336	0.00322138	0.00252536	0.0765027	medium heterogeneity
Q5T6V5	Queuosine salvage protein	C9orf64	C9orf64	341	4	5.35891	0.000955651	0.000738844	0.000216807	0.000339114	-9.98e-05	0.000799766	0.000125077	0.379781	stable in BPH and ADCA
P00915	Carbonic anhydrase 1 (EC 4.2.1.1) (Carbonate dehydratase I) (Carbonic anhydrase B) (CAB) (Carbonic anhydrase I) (CA-I)	CA1	CA1	261	4	5.45385	0.00194938	0.000592042	0.00135734	0.00149066	0.000843743	0.00249812	0.00125734	0.114754	medium heterogeneity
P07451	Carbonic anhydrase 3 (EC 4.2.1.1) (Carbonate dehydratase III) (Carbonic anhydrase III) (CA-III)	CA3	CA3	260	6	5.86714	0.00221137	0.00072515	0.00148622	0.00243596	0.000509479	0.00156721	0.000773911	0.103825	medium heterogeneity
P35219	Carbonic anhydrase-related protein (CARP) (Carbonic anhydrase VIII) (CA-VIII)	CA8	CA8 CALS	290	2	5.27223	0.0165335	0.00186413	0.0146694	0.0164055	0.00933246	0.0254719	0.0133673	0.00273224	variable in BPH and ADCA
Q9H8G2	Caspase activity and apoptosis inhibitor 1 (Conserved anti-apoptotic protein) (CAAP)	CAAP1	CAAP1 C9orf82 CAAP	361	2	5.84734	0.00291499	0.000299553	0.00261543	0.00504546	0.000633578	0.00127092	0.000792912	0.0519126	medium heterogeneity
Q9Y376	Calcium-binding protein 39 (MO25alpha) (Protein Mo25)	CAB39	CAB39 MO25 CGI-66	341	5	5.16022	0.0145878	0.00125964	0.0133281	0.0169369	0.00608574	0.0242292	0.0106216	0.00273224	variable in BPH and ADCA
Q9H9S4	Calcium-binding protein 39-like (Antigen MLAA-34) (MO25beta) (Mo25-like protein)	CAB39L	CAB39L	337	3	4.87949	0.00557341	0.00216218	0.00341123	0.00283676	0.00463168	0.0014733	0.00384209	0.0409836	medium heterogeneity
Q9HB71	Calcyclin-binding protein (CacyBP) (hCacyBP) (S100A6-binding protein) (Siah-interacting protein)	CACYBP	CACYBP S100A6BP SIP PNAS-107	228	3	5.40639	0.00686783	0.00163159	0.00523623	0.0056187	0.00213938	0.0133794	0.00494939	0.0136612	medium heterogeneity
P27708	CAD protein [Includes: Glutamine-dependent carbamoyl-phosphate synthase (EC 6.3.5.5); Aspartate carbamoyltransferase (EC 2.1.3.2); Dihydroorotase (EC 3.5.2.3)]	CAD	CAD	2225	3	5.37972	0.00429106	0.00185389	0.00243716	0.0010164	0.00391413	0.00226852	0.00350273	0.057377	medium heterogeneity
P05937	Calbindin (Calbindin D28) (D-28K) (Vitamin D-dependent calcium-binding protein, avian-type)	CALB1	CALB1 CAB27	261	2	4.93885	0.00945487	0.000991425	0.00846345	0.00440789	0.01234	0.00900043	0.0115051	0.00273224	variable in ADCA
Q05682	Caldesmon (CDM)	CALD1	CALD1 CAD CDM	793	18	5.597	0.0100407	0.000124443	0.00991626	0.0157826	0.00233327	0.0150661	0.00551648	0.00273224	variable in BPH
P62158	Calmodulin-3	CALM3	CALM3 CALML2 CAM3 CAMC CAMIII	149	7	5.68884	0.00846316	0.000534789	0.00792837	0.00753446	0.00699564	0.0119083	0.0082238	0.00273224	variable in BPH and ADCA
P27797	Calreticulin (CRP55) (Calregulin) (Endoplasmic reticulum resident protein 60) (ERp60) (HACBP) (grp60)	CALR	CALR CRTC	417	15	5.50545	0.00246235	0.000557253	0.0019051	0.00128168	0.00122265	0.00582272	0.00237266	0.0765027	medium heterogeneity
O43852	Calumenin (Crocalbin) (IEF SSP 9302)	CALU	CALU	315	7	5.62126	0.00174994	0.000284682	0.00146526	0.00118669	0.00162186	0.00183119	0.00167419	0.103825	medium heterogeneity
Q14012	Calcium/calmodulin-dependent protein kinase type 1 (EC 2.7.11.17) (CaM kinase I) (CaM-KI) (CaM kinase I alpha) (CaMKI-alpha)	CAMK1	CAMK1	370	3	5.60757	0.00180231	0.000286719	0.00151559	0.00210782	0.00112595	0.0009078	0.00107141	0.101093	medium heterogeneity
Q8IU85	Calcium/calmodulin-dependent protein kinase type 1D (EC 2.7.11.17) (CaM kinase I delta) (CaM kinase ID) (CaM-KI delta) (CaMKI delta) (CaMKID) (CaMKI-like protein kinase) (CKLiK)	CAMK1D	CAMK1D CAMKID	385	2	5.50582	0.00242423	0.00187818	0.000546043	0.00155156	-0.000229483	-0.000143934	-0.000208096	0.226776	medium heterogeneity
Q13557	Calcium/calmodulin-dependent protein kinase type II subunit delta (CaM kinase II subunit delta) (CaMK-II subunit delta) (EC 2.7.11.17)	CAMK2D	CAMK2D CAMKD	499	3	5.07361	0.0112208	0.0031616	0.00805916	0.0171056	0.00174368	-0.000133797	0.00127431	0.00273224	variable in BPH
Q96RR4	Calcium/calmodulin-dependent protein kinase kinase 2 (CaM-KK 2) (CaM-kinase kinase 2) (CaMKK 2) (EC 2.7.11.17) (Calcium/calmodulin-dependent protein kinase kinase beta) (CaM-KK beta) (CaM-kinase kinase beta) (CaMKK beta)	CAMKK2	CAMKK2 CAMKKB KIAA0787	588	3	5.90778	0.00243032	0.000940734	0.00148958	-0.000145028	0.00173418	0.00565963	0.00271554	0.103825	medium heterogeneity
Q5T5Y3	Calmodulin-regulated spectrin-associated protein 1	CAMSAP1	CAMSAP1	1602	2	5.92829	0.0169199	0.00133397	0.0155859	0.0265297	0.00593468	0.0117084	0.0073781	0.00273224	variable in BPH
Q86VP6	Cullin-associated NEDD8-dissociated protein 1 (Cullin-associated and neddylation-dissociated protein 1) (TBP-interacting protein of 120 kDa A) (TBP-interacting protein 120A) (p120 CAND1)	CAND1	CAND1 KIAA0829 TIP120 TIP120A	1230	11	4.51838	0.00522334	0.00267069	0.00255264	0.000465325	0.00262414	0.00860012	0.00411813	0.0546448	medium heterogeneity
Q8WVQ1	Soluble calcium-activated nucleotidase 1 (SCAN-1) (EC 3.6.1.6) (Apyrase homolog) (Putative MAPK-activating protein PM09) (Putative NF-kappa-B-activating protein 107)	CANT1	CANT1 SHAPY	401	6	5.17002	0.0021498	0.00130773	0.00084207	0.00147786	0.000110342	0.00112987	0.000365225	0.18306	medium heterogeneity
P27824	Calnexin (IP90) (Major histocompatibility complex class I antigen-binding protein p88) (p90)	CANX	CANX	592	10	5.4124	0.00268931	0.00027545	0.00241386	0.00182938	0.00107593	0.0081811	0.00285222	0.057377	medium heterogeneity
Q01518	Adenylyl cyclase-associated protein 1 (CAP 1)	CAP1	CAP1 CAP	475	11	5.44283	0.000523022	0.000327671	0.000195351	0.000501935	2.06e-05	-0.000200137	-3.46e-05	0.39071	stable in BPH and ADCA
P40123	Adenylyl cyclase-associated protein 2 (CAP 2)	CAP2	CAP2	477	3	4.98292	0.00119246	0.000339175	0.000853285	0.000822329	0.000771887	0.00119035	0.000876502	0.180328	medium heterogeneity
P40121	Macrophage-capping protein (Actin regulatory protein CAP-G)	CAPG	CAPG AFCP MCP	348	8	5.29499	0.00902294	0.000901004	0.00812193	0.0148785	0.00297416	0.00329541	0.00305448	0.00273224	variable in BPH
P07384	Calpain-1 catalytic subunit (EC 3.4.22.52) (Calcium-activated neutral proteinase 1) (CANP 1) (Calpain mu-type) (Calpain-1 large subunit) (Cell proliferation-inducing gene 30 protein) (Micromolar-calpain) (muCANP)	CAPN1	CAPN1 CANPL1 PIG30	714	12	5.22346	0.00237164	0.000441317	0.00193032	0.00373501	0.000421889	0.00104154	0.000576801	0.0765027	medium heterogeneity
P17655	Calpain-2 catalytic subunit (EC 3.4.22.53) (Calcium-activated neutral proteinase 2) (CANP 2) (Calpain M-type) (Calpain large polypeptide L2) (Calpain-2 large subunit) (Millimolar-calpain) (M-calpain)	CAPN2	CAPN2 CANPL2	700	5	5.22245	0.00146918	0.000396609	0.00107257	0.000884778	0.00133625	0.000844902	0.00121341	0.144809	medium heterogeneity
O15484	Calpain-5 (EC 3.4.22.-) (Calpain htra-3) (New calpain 3) (nCL-3)	CAPN5	CAPN5 NCL3	640	2	5.03662	0.00763268	0.00347331	0.00415937	0.00729485	0.00124657	0.00349139	0.00180777	0.0245902	medium heterogeneity
Q9Y6W3	Calpain-7 (EC 3.4.22.-) (PalB homolog) (PalBH)	CAPN7	CAPN7 PALBH	813	2	5.36517	0.008195	0.00245384	0.00574117	0.00670156	0.00427053	0.00727187	0.00502087	0.010929	medium heterogeneity
P04632	Calpain small subunit 1 (CSS1) (Calcium-activated neutral proteinase small subunit) (CANP small subunit) (Calcium-dependent protease small subunit) (CDPS) (Calcium-dependent protease small subunit 1) (Calpain regulatory subunit)	CAPNS1	CAPNS1 CAPN4 CAPNS	268	4	5.25291	0.00627475	0.00404747	0.00222728	0.00247908	0.00268011	0.00011342	0.00203844	0.0601093	medium heterogeneity
Q14444	Caprin-1 (Cell cycle-associated protein 1) (Cytoplasmic activation- and proliferation-associated protein 1) (GPI-anchored membrane protein 1) (GPI-anchored protein p137) (GPI-p137) (p137GPI) (Membrane component chromosome 11 surface marker 1) (RNA granule protein 105)	CAPRIN1	CAPRIN1 GPIAP1 GPIP137 M11S1 RNG105	709	5	5.22218	0.00195652	0.000878638	0.00107788	0.00150348	0.00105538	-0.000131405	0.000758682	0.144809	medium heterogeneity
Q13938	Calcyphosin (Calcyphosine)	CAPS	CAPS	189	3	5.29126	0.00780182	0.00339259	0.00440924	0.0097557	0.00111004	-0.00173259	0.000399385	0.0191257	medium heterogeneity
P52907	F-actin-capping protein subunit alpha-1 (CapZ alpha-1)	CAPZA1	CAPZA1	286	6	5.23353	0.00334109	0.000492576	0.00284851	0.0044716	0.00075658	0.00425505	0.0016312	0.0409836	medium heterogeneity
P47755	F-actin-capping protein subunit alpha-2 (CapZ alpha-2)	CAPZA2	CAPZA2	286	7	5.39329	0.000688484	0.00045963	0.000228853	0.000316725	0.000241929	-7.4e-05	0.00016295	0.371585	stable in BPH and ADCA
P49589	Cysteine--tRNA ligase, cytoplasmic (EC 6.1.1.16) (Cysteinyl-tRNA synthetase) (CysRS)	CARS	CARS	748	4	5.38239	0.00154805	0.000293936	0.00125412	0.00141989	0.000921846	0.00175361	0.00112979	0.128415	medium heterogeneity
P29466	Caspase-1 (CASP-1) (EC 3.4.22.36) (Interleukin-1 beta convertase) (IL-1BC) (Interleukin-1 beta-converting enzyme) (ICE) (IL-1 beta-converting enzyme) (p45) [Cleaved into: Caspase-1 subunit p20; Caspase-1 subunit p10]	CASP1	CASP1 IL1BC IL1BCE	404	3	5.55739	0.0050554	0.00331255	0.00174285	0.00469463	-0.00105565	0.00128298	-0.00047099	0.0874317	medium heterogeneity
Q6UXS9	Inactive caspase-12 (CASP-12)	CASP12	CASP12 UNQ9415/PRO34398	341	2	5.60872	0.0120633	0.00222128	0.00984199	0.00503111	0.0167221	0.00363439	0.0134501	0.00273224	variable in ADCA
P31944	Caspase-14 (CASP-14) (EC 3.4.22.-) [Cleaved into: Caspase-14 subunit p17, mature form; Caspase-14 subunit p10, mature form; Caspase-14 subunit p20, intermediate form; Caspase-14 subunit p8, intermediate form]	CASP14	CASP14	242	2	5.96348	0.0243102	0.00310617	0.021204	0.0246273	0.0144677	0.0311433	0.0186366	0.00273224	variable in BPH and ADCA
P51878	Caspase-5 (CASP-5) (EC 3.4.22.58) (ICE(rel)-III) (Protease ICH-3) (Protease TY) [Cleaved into: Caspase-5 subunit p20; Caspase-5 subunit p10]	CASP5	CASP5 ICH3	434	2	5.7888	0.00221488	0.000811613	0.00140327	0.00181183	0.00112399	0.00101546	0.00109686	0.114754	medium heterogeneity
P55210	Caspase-7 (CASP-7) (EC 3.4.22.60) (Apoptotic protease Mch-3) (CMH-1) (ICE-like apoptotic protease 3) (ICE-LAP3) [Cleaved into: Caspase-7 subunit p20; Caspase-7 subunit p11]	CASP7	CASP7 MCH3	303	3	5.36501	0.00328299	0.00193279	0.00135019	0.000248682	0.00182099	0.00324233	0.00217633	0.117486	medium heterogeneity
Q14790	Caspase-8 (CASP-8) (EC 3.4.22.61) (Apoptotic cysteine protease) (Apoptotic protease Mch-5) (CAP4) (FADD-homologous ICE/ced-3-like protease) (FADD-like ICE) (FLICE) (ICE-like apoptotic protease 5) (MORT1-associated ced-3 homolog) (MACH) [Cleaved into: Caspase-8 subunit p18; Caspase-8 subunit p10]	CASP8	CASP8 MCH5	479	2	5.18637	0.00396991	0.00135162	0.0026183	0.00375816	0.00119331	0.00347366	0.0017634	0.0519126	medium heterogeneity
O14958	Calsequestrin-2 (Calsequestrin, cardiac muscle isoform)	CASQ2	CASQ2	399	2	5.25395	0.00214176	0.00173108	0.000410678	0.000676674	0.00027355	2.41e-05	0.000211181	0.278689	medium heterogeneity
P20810	Calpastatin (Calpain inhibitor) (Sperm BS-17 component)	CAST	CAST	708	5	5.17908	0.00369885	0.000561385	0.00313746	0.00389692	0.00235107	0.00321825	0.00256786	0.0409836	medium heterogeneity
P04040	Catalase (EC 1.11.1.6)	CAT	CAT	527	7	5.21137	0.00242575	0.000848537	0.00157722	0.00236957	0.000907622	0.00120893	0.00098295	0.0956284	medium heterogeneity
Q6NZI2	Caveolae-associated protein 1 (Cavin-1) (Polymerase I and transcript release factor)	CAVIN1	CAVIN1 PTRF FKSG13	390	11	5.80048	0.00240909	0.00088613	0.00152296	0.000567039	0.000856046	0.00639146	0.0022399	0.101093	medium heterogeneity
O95810	Caveolae-associated protein 2 (Cavin-2) (PS-p68) (Phosphatidylserine-binding protein) (Serum deprivation-response protein)	CAVIN2	CAVIN2 SDPR	425	4	5.47335	0.00191332	0.00140279	0.000510533	-0.000133928	0.000908733	0.00124931	0.000993878	0.23224	medium heterogeneity
Q969G5	Caveolae-associated protein 3 (Cavin-3) (Protein kinase C delta-binding protein) (Serum deprivation response factor-related gene product that binds to C-kinase) (hSRBC)	CAVIN3	CAVIN3 PRKCDBP SRBC	261	6	5.134	0.00351101	0.000631167	0.00287984	0.00169042	0.00180116	0.00968412	0.0037719	0.0409836	medium heterogeneity
Q8N350	Voltage-dependent calcium channel beta subunit-associated regulatory protein	CBARP	CBARP C19orf26	705	2	5.78382	0.00241484	0.00132965	0.00108519	0.00139027	0.000345473	0.00238911	0.000856383	0.144809	medium heterogeneity
Q13951	Core-binding factor subunit beta (CBF-beta) (Polyomavirus enhancer-binding protein 2 beta subunit) (PEA2-beta) (PEBP2-beta) (SL3-3 enhancer factor 1 subunit beta) (SL3/AKV core-binding factor beta subunit)	CBFB	CBFB	182	2	5.74793	0.00513062	0.0012167	0.00391392	0.00672688	0.000699123	0.00511941	0.00180419	0.0300546	medium heterogeneity
P22681	E3 ubiquitin-protein ligase CBL (EC 2.3.2.27) (Casitas B-lineage lymphoma proto-oncogene) (Proto-oncogene c-Cbl) (RING finger protein 55) (RING-type E3 ubiquitin transferase CBL) (Signal transduction protein CBL)	CBL	CBL CBL2 RNF55	906	2	5.16093	0.00823065	0.00311368	0.00511697	0.00961378	0.00147105	0.0025643	0.00174437	0.0163934	medium heterogeneity
P16152	Carbonyl reductase [NADPH] 1 (EC 1.1.1.184) (15-hydroxyprostaglandin dehydrogenase [NADP(+)]) (EC 1.1.1.197) (NADPH-dependent carbonyl reductase 1) (Prostaglandin 9-ketoreductase) (Prostaglandin-E(2) 9-reductase) (EC 1.1.1.189) (Short chain dehydrogenase/reductase family 21C member 1)	CBR1	CBR1 CBR CRN SDR21C1	277	9	5.25522	0.00368171	0.0011983	0.00248342	0.00115649	0.00373132	0.00272048	0.00347861	0.0546448	medium heterogeneity
O75828	Carbonyl reductase [NADPH] 3 (EC 1.1.1.184) (NADPH-dependent carbonyl reductase 3) (Short chain dehydrogenase/reductase family 21C member 2)	CBR3	CBR3	277	4	5.60327	0.00210638	0.00202808	7.83e-05	-0.000287784	-2.42e-05	0.00148393	0.000352859	0.456284	stable in BPH and ADCA
Q13185	Chromobox protein homolog 3 (HECH) (Heterochromatin protein 1 homolog gamma) (HP1 gamma) (Modifier 2 protein)	CBX3	CBX3	183	5	5.23331	0.00375382	0.000788288	0.00296553	0.0028132	0.00296092	0.00343637	0.00307978	0.0409836	medium heterogeneity
P45973	Chromobox protein homolog 5 (Antigen p25) (Heterochromatin protein 1 homolog alpha) (HP1 alpha)	CBX5	CBX5 HP1A	191	2	5.40948	0.000960877	0.000206486	0.00075439	0.000763135	0.000657875	0.0010177	0.000747832	0.193989	medium heterogeneity
Q6P1N0	Coiled-coil and C2 domain-containing protein 1A (Akt kinase-interacting protein 1) (Five prime repressor element under dual repression-binding protein 1) (FRE under dual repression-binding protein 1) (Freud-1) (Putative NF-kappa-B-activating protein 023N)	CC2D1A	CC2D1A AKI1	951	2	5.34399	0.00705388	0.00309153	0.00396235	0.00431017	0.00409262	0.00252807	0.00370148	0.0300546	medium heterogeneity
Q8IX12	Cell division cycle and apoptosis regulator protein 1 (Cell cycle and apoptosis regulatory protein 1) (CARP-1) (Death inducer with SAP domain)	CCAR1	CCAR1 CARP1 DIS	1150	5	5.39563	0.00251146	0.00153834	0.000973122	0.00186608	-0.000272519	0.00203116	0.0003034	0.166667	medium heterogeneity
Q8N163	Cell cycle and apoptosis regulator protein 2 (Cell division cycle and apoptosis regulator protein 2) (DBIRD complex subunit KIAA1967) (Deleted in breast cancer gene 1 protein) (DBC-1) (DBC.1) (NET35) (p30 DBC)	CCAR2	CCAR2 DBC1 KIAA1967	923	4	4.94814	0.00281921	0.000610482	0.00220873	0.00180483	0.00308027	0.000805803	0.00251165	0.0601093	medium heterogeneity
O60826	Coiled-coil domain-containing protein 22	CCDC22	CCDC22 CXorf37 JM1	627	2	5.25837	0.00185472	0.000630148	0.00122458	0.000444904	0.00211171	0.000902173	0.00180933	0.128415	medium heterogeneity
Q96A33	Coiled-coil domain-containing protein 47	CCDC47	CCDC47 GK001 MSTP041 PSEC0077	483	3	5.36536	0.0065046	0.00121773	0.00528687	0.0118005	0.000259108	0.00082936	0.000401671	0.0136612	medium heterogeneity
Q4VC31	Coiled-coil domain-containing protein 58	CCDC58	CCDC58	144	2	5.50946	0.00101177	0.000467116	0.000544657	-6.08e-05	0.00120792	0.000371287	0.00099876	0.226776	medium heterogeneity
Q16204	Coiled-coil domain-containing protein 6 (Papillary thyroid carcinoma-encoded protein) (Protein H4)	CCDC6	CCDC6 D10S170 TST1	474	4	5.20322	0.000727589	0.000332679	0.00039491	0.000214252	0.000445315	0.000785664	0.000530403	0.286885	medium heterogeneity
Q3V6T2	Girdin (Akt phosphorylation enhancer) (APE) (Coiled-coil domain-containing protein 88A) (G alpha-interacting vesicle-associated protein) (GIV) (Girders of actin filament) (Hook-related protein 1) (HkRP1)	CCDC88A	CCDC88A APE GRDN KIAA1212	1871	5	5.85199	0.00129481	0.000446219	0.000848591	0.00111269	0.000551138	0.00094866	0.000650519	0.180328	medium heterogeneity
Q7Z6B0	Coiled-coil domain-containing protein 91 (GGA-binding partner) (p56 accessory protein)	CCDC91	CCDC91 GGABP HSD8	441	2	5.41128	0.0144569	0.0136377	0.00081924	0.00224507	0.00189033	-0.00667153	-0.000250132	0.18306	medium heterogeneity
Q96F63	Coiled-coil domain-containing protein 97	CCDC97	CCDC97	343	2	5.80033	0.00419284	0.00405744	0.000135398	-0.000756674	0.00208521	-0.00303781	0.000804452	0.420765	stable in BPH and ADCA
P24385	G1/S-specific cyclin-D1 (B-cell lymphoma 1 protein) (BCL-1) (BCL-1 oncogene) (PRAD1 oncogene)	CCND1	CCND1 BCL1 PRAD1	295	2	5.68376	0.0026783	0.00120851	0.00146979	0.00024706	0.00242955	0.00225869	0.00238684	0.103825	medium heterogeneity
P78371	T-complex protein 1 subunit beta (TCP-1-beta) (CCT-beta)	CCT2	CCT2 99D8.1 CCTB	535	18	5.23503	0.00152916	0.000524215	0.00100494	0.000278815	0.00101774	0.00314494	0.00154954	0.161202	medium heterogeneity
P49368	T-complex protein 1 subunit gamma (TCP-1-gamma) (CCT-gamma) (hTRiC5)	CCT3	CCT3 CCTG TRIC5	545	15	5.20682	0.00160969	0.000959058	0.000650631	0.000383281	0.000289975	0.00253465	0.000851143	0.20765	medium heterogeneity
P50991	T-complex protein 1 subunit delta (TCP-1-delta) (CCT-delta) (Stimulator of TAR RNA-binding)	CCT4	CCT4 CCTD SRB	539	11	5.16236	0.00159274	0.00038697	0.00120577	0.00128411	0.00068225	0.0025413	0.00114701	0.131148	medium heterogeneity
P48643	T-complex protein 1 subunit epsilon (TCP-1-epsilon) (CCT-epsilon)	CCT5	CCT5 CCTE KIAA0098	541	15	5.15128	0.00129145	0.00105128	0.000240173	0.000194337	0.000374305	-2.47e-05	0.000274551	0.36612	stable in BPH and ADCA
P40227	T-complex protein 1 subunit zeta (TCP-1-zeta) (Acute morphine dependence-related protein 2) (CCT-zeta-1) (HTR3) (Tcp20)	CCT6A	CCT6A CCT6 CCTZ	531	10	5.29272	0.00175325	0.000130832	0.00162242	0.000908313	0.00214219	0.00220541	0.00215799	0.0901639	medium heterogeneity
P50990	T-complex protein 1 subunit theta (TCP-1-theta) (CCT-theta) (Chaperonin containing T-complex polypeptide 1 subunit 8) (Renal carcinoma antigen NY-REN-15)	CCT8	CCT8 C21orf112 CCTQ KIAA0002	548	20	5.35118	0.00200342	0.000280481	0.00172294	0.00141403	0.00142474	0.00354425	0.00195462	0.0874317	medium heterogeneity
Q6YHK3	CD109 antigen (150 kDa TGF-beta-1-binding protein) (C3 and PZP-like alpha-2-macroglobulin domain-containing protein 7) (Platelet-specific Gov antigen) (p180) (r150) (CD antigen CD109)	CD109	CD109 CPAMD7	1445	5	5.4506	0.00247732	0.000346579	0.00213075	0.00176711	0.00254436	0.0019808	0.00240347	0.0655738	medium heterogeneity
P08571	Monocyte differentiation antigen CD14 (Myeloid cell-specific leucine-rich glycoprotein) (CD antigen CD14) [Cleaved into: Monocyte differentiation antigen CD14, urinary form; Monocyte differentiation antigen CD14, membrane-bound form]	CD14	CD14	375	2	5.41242	0.00762731	0.00188098	0.00574633	0.00473668	0.00718782	0.00445082	0.00650357	0.010929	medium heterogeneity
Q9Y5K6	CD2-associated protein (Adapter protein CMS) (Cas ligand with multiple SH3 domains)	CD2AP	CD2AP	639	4	5.08687	0.0129727	0.00826356	0.00470917	0.0177009	-0.00546262	-0.00375081	-0.00503467	0.0191257	medium heterogeneity
O95400	CD2 antigen cytoplasmic tail-binding protein 2 (CD2 cytoplasmic domain-binding protein 2) (CD2 tail-binding protein 2) (U5 snRNP 52K protein) (U5-52K)	CD2BP2	CD2BP2 KIAA1178	341	3	5.48254	0.00384336	0.00355011	0.000293243	0.00181412	-0.000236438	-0.00268035	-0.000847416	0.338798	medium heterogeneity
P28907	ADP-ribosyl cyclase/cyclic ADP-ribose hydrolase 1 (EC 3.2.2.6) (2'-phospho-ADP-ribosyl cyclase) (2'-phospho-ADP-ribosyl cyclase/2'-phospho-cyclic-ADP-ribose transferase) (EC 2.4.99.20) (2'-phospho-cyclic-ADP-ribose transferase) (ADP-ribosyl cyclase 1) (ADPRC 1) (Cyclic ADP-ribose hydrolase 1) (cADPr hydrolase 1) (T10) (CD antigen CD38)	CD38	CD38	300	3	5.00803	0.00360006	0.00130545	0.00229461	0.00193905	0.00149703	0.00575404	0.00256128	0.0601093	medium heterogeneity
O15446	DNA-directed RNA polymerase I subunit RPA34 (A34.5) (Antisense to ERCC-1 protein) (ASE-1) (CD3-epsilon-associated protein) (CAST) (CD3E-associated protein) (RNA polymerase I-associated factor PAF49)	CD3EAP	CD3EAP ASE1 CAST PAF49	510	2	5.43095	0.00344532	0.00246189	0.00098343	0.000992565	0.00171556	-0.00124037	0.000976578	0.166667	medium heterogeneity
P16070	CD44 antigen (CDw44) (Epican) (Extracellular matrix receptor III) (ECMR-III) (GP90 lymphocyte homing/adhesion receptor) (HUTCH-I) (Heparan sulfate proteoglycan) (Hermes antigen) (Hyaluronate receptor) (Phagocytic glycoprotein 1) (PGP-1) (Phagocytic glycoprotein I) (PGP-I) (CD antigen CD44)	CD44	CD44 LHR MDU2 MDU3 MIC4	742	2	4.78015	0.00418039	0.00107304	0.00310736	0.00450819	0.00089061	0.00555512	0.00205674	0.0409836	medium heterogeneity
P04233	HLA class II histocompatibility antigen gamma chain (HLA-DR antigens-associated invariant chain) (Ia antigen-associated invariant chain) (Ii) (p33) (CD antigen CD74)	CD74	CD74 DHLAG	296	3	5.83831	0.000948162	0.000176979	0.000771184	0.000844916	0.000641398	0.000939343	0.000715884	0.188525	medium heterogeneity
P60033	CD81 antigen (26 kDa cell surface protein TAPA-1) (Target of the antiproliferative antibody 1) (Tetraspanin-28) (Tspan-28) (CD antigen CD81)	CD81	CD81 TAPA1 TSPAN28	236	2	4.99678	0.00830598	0.00570933	0.00259665	0.00501979	0.000773589	0.00079643	0.000779299	0.0519126	medium heterogeneity
P21926	CD9 antigen (5H9 antigen) (Cell growth-inhibiting gene 2 protein) (Leukocyte antigen MIC3) (Motility-related protein) (MRP-1) (Tetraspanin-29) (Tspan-29) (p24) (CD antigen CD9)	CD9	CD9 MIC3 TSPAN29 GIG2	228	3	5.31832	0.00368657	0.00148537	0.0022012	0.00091422	0.00163481	0.00776132	0.00316644	0.0601093	medium heterogeneity
P48960	CD97 antigen (Leukocyte antigen CD97) (CD antigen CD97) [Cleaved into: CD97 antigen subunit alpha; CD97 antigen subunit beta]	CD97	CD97	835	3	5.24995	0.00399831	0.000691575	0.00330674	0.00150833	0.00547821	0.00218754	0.00465554	0.0409836	medium heterogeneity
P32320	Cytidine deaminase (EC 3.5.4.5) (Cytidine aminohydrolase)	CDA	CDA CDD	146	2	5.78102	0.0101344	0.00115117	0.00898324	0.0154899	0.00262479	0.00853858	0.00410324	0.00273224	variable in BPH
Q12834	Cell division cycle protein 20 homolog (p55CDC)	CDC20	CDC20	499	2	5.46961	0.00376556	0.0024452	0.00132036	0.00202255	0.000273115	0.00235557	0.000793729	0.125683	medium heterogeneity
Q9UJX2	Cell division cycle protein 23 homolog (Anaphase-promoting complex subunit 8) (APC8) (Cyclosome subunit 8)	CDC23	CDC23 ANAPC8	597	2	5.85674	0.00847122	0.000764254	0.00770696	0.00730806	0.00892885	0.00523801	0.00800614	0.00273224	variable in BPH and ADCA
P30305	M-phase inducer phosphatase 2 (EC 3.1.3.48) (Dual specificity phosphatase Cdc25B)	CDC25B	CDC25B CDC25HU2	580	2	5.39205	0.00388522	0.00222102	0.0016642	0.00167923	0.00162504	0.0017366	0.00165293	0.0901639	medium heterogeneity
Q16543	Hsp90 co-chaperone Cdc37 (Hsp90 chaperone protein kinase-targeting subunit) (p50Cdc37) [Cleaved into: Hsp90 co-chaperone Cdc37, N-terminally processed]	CDC37	CDC37 CDC37A	378	5	5.32589	0.00364376	0.000600604	0.00304316	0.00408729	0.00146945	0.00463189	0.00226006	0.0409836	medium heterogeneity
O60508	Pre-mRNA-processing factor 17 (Cell division cycle 40 homolog) (EH-binding protein 3) (Ehb3) (PRP17 homolog) (hPRP17)	CDC40	CDC40 EHB3 PRP17 PRPF17	579	2	5.9994	0.00453726	0.000641322	0.00389594	0.00530732	0.00333895	0.00133275	0.0028374	0.0300546	medium heterogeneity
P60953	Cell division control protein 42 homolog (G25K GTP-binding protein)	CDC42	CDC42	191	4	5.30112	0.0248943	0.00291351	0.0219808	0.0280422	0.0109142	0.0369962	0.0174347	0.00273224	variable in BPH and ADCA
Q5VT25	Serine/threonine-protein kinase MRCK alpha (EC 2.7.11.1) (CDC42-binding protein kinase alpha) (DMPK-like alpha) (Myotonic dystrophy kinase-related CDC42-binding kinase alpha) (MRCK alpha) (Myotonic dystrophy protein kinase-like alpha)	CDC42BPA	CDC42BPA KIAA0451	1732	2	5.43008	0.00254664	0.00158487	0.000961766	0.00175565	-5.45e-05	0.00162892	0.000366351	0.166667	medium heterogeneity
Q6DT37	Serine/threonine-protein kinase MRCK gamma (EC 2.7.11.1) (CDC42-binding protein kinase gamma) (DMPK-like gamma) (Myotonic dystrophy kinase-related CDC42-binding kinase gamma) (MRCK gamma) (MRCKG) (Myotonic dystrophy protein kinase-like gamma) (Myotonic dystrophy protein kinase-like alpha)	CDC42BPG	CDC42BPG DMPK2	1551	2	5.46812	0.00734798	0.00106919	0.0062788	0.00582689	0.00663949	0.00655245	0.00661773	0.00819672	variable in BPH and ADCA
Q99459	Cell division cycle 5-like protein (Cdc5-like protein) (Pombe cdc5-related protein)	CDC5L	CDC5L KIAA0432 PCDC5RP	802	3	5.22463	0.00124632	0.00056949	0.000676832	4.48e-05	0.00108821	0.0013387	0.00115084	0.204918	medium heterogeneity
Q6P1J9	Parafibromin (Cell division cycle protein 73 homolog) (Hyperparathyroidism 2 protein)	CDC73	CDC73 C1orf28 HRPT2	531	2	5.4844	0.00376195	0.000573856	0.00318809	0.00432121	0.00239265	0.00217506	0.00233826	0.0409836	medium heterogeneity
P12830	Cadherin-1 (CAM 120/80) (Epithelial cadherin) (E-cadherin) (Uvomorulin) (CD antigen CD324) [Cleaved into: E-Cad/CTF1; E-Cad/CTF2; E-Cad/CTF3]	CDH1	CDH1 CDHE UVO	882	8	4.7744	0.00294441	0.000899342	0.00204507	0.00139268	0.00126156	0.00635274	0.00253436	0.068306	medium heterogeneity
Q12864	Cadherin-17 (Intestinal peptide-associated transporter HPT-1) (Liver-intestine cadherin) (LI-cadherin)	CDH17	CDH17	832	2	5.24067	0.00560453	0.00350682	0.00209771	0.00445057	0.000429391	4.41e-05	0.000333071	0.068306	medium heterogeneity
Q9BYE9	Cadherin-related family member 2 (Protocadherin LKC) (PC-LKC) (Protocadherin-24)	CDHR2	CDHR2 PCDH24 PCLKC	1310	2	5.22519	0.0380879	0.00604772	0.0320402	0.042437	0.024195	0.0243855	0.0242426	0.00273224	variable in BPH and ADCA
Q8IZL9	Cyclin-dependent kinase 20 (EC 2.7.11.22) (CDK-activating kinase p42) (CAK-kinase p42) (Cell cycle-related kinase) (Cell division protein kinase 20) (Cyclin-dependent protein kinase H) (Cyclin-kinase-activating kinase p42)	CDK20	CDK20 CCRK CDCH	346	2	4.86276	0.00844059	0.00544603	0.00299456	-0.00050959	0.00706853	0.00128508	0.00562267	0.0409836	medium heterogeneity
O14519	Cyclin-dependent kinase 2-associated protein 1 (CDK2-associated protein 1) (Deleted in oral cancer 1) (DOC-1) (Putative oral cancer suppressor)	CDK2AP1	CDK2AP1 CDKAP1 DOC1	115	3	3.80122	0.00654212	0.00372446	0.00281766	-0.000272558	0.00563676	0.00363101	0.00513532	0.0409836	medium heterogeneity
P11802	Cyclin-dependent kinase 4 (EC 2.7.11.22) (Cell division protein kinase 4) (PSK-J3)	CDK4	CDK4	303	3	4.10404	0.00396037	0.00335671	0.000603665	0.000307243	0.00100741	0.000281712	0.000825982	0.218579	medium heterogeneity
Q96SN8	CDK5 regulatory subunit-associated protein 2 (CDK5 activator-binding protein C48) (Centrosome-associated protein 215)	CDK5RAP2	CDK5RAP2 CEP215 KIAA1633	1893	2	5.00875	0.00419619	0.00133838	0.00285781	0.00435969	0.00212301	0.000556548	0.00173139	0.0409836	medium heterogeneity
Q96JB5	CDK5 regulatory subunit-associated protein 3 (CDK5 activator-binding protein C53) (LXXLL/leucine-zipper-containing ARF-binding protein) (Protein HSF-27)	CDK5RAP3	CDK5RAP3 IC53 LZAP MSTP016 OK/SW-cl.114 PP1553	506	3	5.25041	0.00260606	0.00219069	0.000415366	0.00114522	-0.000158998	-5.11e-05	-0.000132029	0.275956	medium heterogeneity
Q86X02	Cerebellar degeneration-related protein 2-like (Paraneoplastic 62 kDa antigen)	CDR2L	CDR2L HUMPPA	465	2	5.46975	0.000870072	0.000449468	0.000420604	0.000251944	0.000737489	-2.41e-05	0.000547099	0.275956	medium heterogeneity
Q9UKY7	Protein CDV3 homolog	CDV3	CDV3 H41	258	3	5.15723	0.0116909	0.00123172	0.0104592	0.0103585	0.0100704	0.0119279	0.0105347	0.00273224	variable in BPH and ADCA
P09093	Chymotrypsin-like elastase family member 3A (EC 3.4.21.70) (Elastase IIIA) (Elastase-3A) (Protease E)	CELA3A	CELA3A ELA3 ELA3A	270	3	5.69136	0.01059	0.00198019	0.00860985	0.0148538	0.00280494	0.00729263	0.00392686	0.00273224	variable in BPH
P07199	Major centromere autoantigen B (Centromere protein B) (CENP-B)	CENPB	CENPB	599	2	5.14695	0.00689778	0.00331901	0.00357877	0.00438025	6.23e-05	0.0117238	0.00297766	0.0355191	medium heterogeneity
Q02224	Centromere-associated protein E (Centromere protein E) (CENP-E) (Kinesin-7) (Kinesin-related protein CENPE)	CENPE	CENPE	2701	2	5.91336	0.00612186	0.000274014	0.00584784	0.00985391	0.00276546	0.0030768	0.00284329	0.00819672	variable in BPH
P49454	Centromere protein F (CENP-F) (AH antigen) (Kinetochore protein CENPF) (Mitosin)	CENPF	CENPF	3210	3	5.42789	0.00728526	0.000616748	0.00666851	0.011422	0.00328294	0.00256474	0.00310339	0.00819672	variable in BPH
Q8N8E3	Centrosomal protein of 112 kDa (Cep112) (Coiled-coil domain-containing protein 46)	CEP112	CEP112 CCDC46	955	3	5.59438	0.00368856	0.00193189	0.00175667	0.00458213	-0.000874464	0.00117372	-0.000362417	0.0874317	medium heterogeneity
Q8N960	Centrosomal protein of 120 kDa (Cep120) (Coiled-coil domain-containing protein 100)	CEP120	CEP120 CCDC100	986	2	5.91648	0.00788375	0.00263548	0.00524827	0.00787446	0.00418658	0.000554775	0.00327863	0.0136612	medium heterogeneity
Q9UPN4	Centrosomal protein of 131 kDa (5-azacytidine-induced protein 1) (Pre-acrosome localization protein 1)	CEP131	CEP131 AZI1 KIAA1118	1083	2	5.37862	0.00438143	0.00221901	0.00216242	0.00536169	-0.000189917	-0.000378377	-0.000237032	0.0655738	medium heterogeneity
Q66GS9	Centrosomal protein of 135 kDa (Cep135) (Centrosomal protein 4)	CEP135	CEP135 CEP4 KIAA0635	1140	2	5.77736	0.0188268	0.0058391	0.0129877	0.0122674	0.0131237	0.0147407	0.0135279	0.00273224	variable in BPH and ADCA
Q5SW79	Centrosomal protein of 170 kDa (Cep170) (KARP-1-binding protein) (KARP1-binding protein)	CEP170	CEP170 FAM68A KAB KIAA0470	1584	6	5.43735	0.0140983	0.000736836	0.0133615	0.0213753	0.00560649	0.0125848	0.00735107	0.00273224	variable in BPH
Q9BV73	Centrosome-associated protein CEP250 (250 kDa centrosomal protein) (Cep250) (Centrosomal Nek2-associated protein 1) (C-Nap1) (Centrosomal protein 2)	CEP250	CEP250 CEP2 CNAP1	2442	2	5.27819	0.00655224	0.00140943	0.00514282	0.00662356	0.00425386	0.00336746	0.00403226	0.0163934	medium heterogeneity
Q96G23	Ceramide synthase 2 (CerS2) (LAG1 longevity assurance homolog 2) (SP260) (Tumor metastasis-suppressor gene 1 protein)	CERS2	CERS2 LASS2 TMSG1	380	2	5.17014	0.0139896	0.00188035	0.0121093	0.0175037	0.00784085	0.00873134	0.00806347	0.00273224	variable in BPH
P23141	Liver carboxylesterase 1 (Acyl-coenzyme A:cholesterol acyltransferase) (ACAT) (Brain carboxylesterase hBr1) (Carboxylesterase 1) (CE-1) (hCE-1) (EC 3.1.1.1) (Cocaine carboxylesterase) (Egasyn) (HMSE) (Methylumbelliferyl-acetate deacetylase 1) (EC 3.1.1.56) (Monocyte/macrophage serine esterase) (Retinyl ester hydrolase) (REH) (Serine esterase 1) (Triacylglycerol hydrolase) (TGH)	CES1	CES1 CES2 SES1	567	5	4.94003	0.00673023	0.00291116	0.00381907	0.00802604	-0.000271514	0.0034699	0.00066384	0.0300546	medium heterogeneity
O00748	Cocaine esterase (EC 3.1.1.84) (Carboxylesterase 2) (CE-2) (hCE-2) (EC 3.1.1.1) (Methylumbelliferyl-acetate deacetylase 2) (EC 3.1.1.56)	CES2	CES2 ICE	559	3	5.90912	0.00400941	0.00164574	0.00236368	0.00171802	0.00347803	0.000957585	0.00284792	0.057377	medium heterogeneity
Q6ZTR5	Cilia- and flagella-associated protein 47	CFAP47	CFAP47 CHDC2 CXorf22 CXorf30 CXorf59	3102	2	4.87915	0.0105171	0.00524346	0.00527367	0.00532616	0.00718122	-0.000606447	0.0052343	0.0136612	medium heterogeneity
P00751	Complement factor B (EC 3.4.21.47) (C3/C5 convertase) (Glycine-rich beta glycoprotein) (GBG) (PBF2) (Properdin factor B) [Cleaved into: Complement factor B Ba fragment; Complement factor B Bb fragment]	CFB	CFB BF BFD	764	8	5.18765	0.00448538	0.0014612	0.00302418	0.00145864	0.0053126	0.000855524	0.00419833	0.0409836	medium heterogeneity
P00746	Complement factor D (EC 3.4.21.46) (Adipsin) (C3 convertase activator) (Properdin factor D)	CFD	CFD DF PFD	253	2	5.651	0.00164549	0.000976034	0.000669456	0.000579665	0.000531029	0.00135411	0.000736799	0.204918	medium heterogeneity
P08603	Complement factor H (H factor 1)	CFH	CFH HF HF1 HF2	1231	6	5.46054	0.00295398	0.000930166	0.00202382	0.00260264	0.00132915	0.00237133	0.00158969	0.0710383	medium heterogeneity
P05156	Complement factor I (EC 3.4.21.45) (C3B/C4B inactivator) [Cleaved into: Complement factor I heavy chain; Complement factor I light chain]	CFI	CFI IF	583	3	5.00078	0.00621989	0.00146332	0.00475657	0.00122139	0.00279095	0.0212589	0.00740795	0.0191257	medium heterogeneity
P23528	Cofilin-1 (18 kDa phosphoprotein) (p18) (Cofilin, non-muscle isoform)	CFL1	CFL1 CFL	166	9	5.75673	0.00280369	0.000729605	0.00207409	0.00107526	0.00319541	0.00170664	0.00282321	0.068306	medium heterogeneity
Q9Y281	Cofilin-2 (Cofilin, muscle isoform)	CFL2	CFL2	166	5	5.33323	0.00627887	0.000548098	0.00573078	0.0110271	0.000817056	0.00458296	0.00175853	0.010929	medium heterogeneity
P27918	Properdin (Complement factor P)	CFP	CFP PFC	469	2	5.38814	0.0236646	0.00504434	0.0186203	0.023159	0.0171581	0.00939071	0.0152162	0.00273224	variable in BPH and ADCA
Q9P2M7	Cingulin	CGN	CGN KIAA1319	1197	8	5.37522	0.000911783	0.000435032	0.000476751	0.000338933	0.000776691	-9.62e-06	0.000580114	0.248634	medium heterogeneity
Q99674	Cell growth regulator with EF hand domain protein 1 (Cell growth regulatory gene 11 protein) (Hydrophobestin)	CGREF1	CGREF1 CGR11	301	2	5.70047	0.0145004	0.00183395	0.0126664	0.0185915	0.0023601	0.0258103	0.00822266	0.00273224	variable in BPH
Q13112	Chromatin assembly factor 1 subunit B (CAF-1 subunit B) (Chromatin assembly factor I p60 subunit) (CAF-I 60 kDa subunit) (CAF-I p60) (M-phase phosphoprotein 7)	CHAF1B	CHAF1B CAF1A CAF1P60 MPHOSPH7 MPP7	559	2	3.84312	0.01314	0.00904566	0.00409439	0.00563327	0.00588458	-0.00589285	0.00294022	0.0273224	medium heterogeneity
Q96JM3	Chromosome alignment-maintaining phosphoprotein 1 (Zinc finger protein 828)	CHAMP1	CHAMP1 C13orf8 CAMP CHAMP KIAA1802 ZNF828	812	2	5.14944	0.00380156	0.00281422	0.000987337	-0.000537641	0.0020179	0.00247058	0.00213107	0.166667	medium heterogeneity
Q9NX63	MICOS complex subunit MIC19 (Coiled-coil-helix-coiled-coil-helix domain-containing protein 3)	CHCHD3	CHCHD3 MIC19 MINOS3	227	3	5.04659	0.00394916	0.00132359	0.00262557	0.00413207	0.00225762	-0.000790072	0.0014957	0.0491803	medium heterogeneity
Q86WJ1	Chromodomain-helicase-DNA-binding protein 1-like (EC 3.6.4.12) (Amplified in liver cancer protein 1)	CHD1L	CHD1L ALC1	897	3	5.53958	0.00330889	0.00213318	0.00117571	0.00021945	0.000727033	0.00539051	0.0018929	0.13388	medium heterogeneity
Q12873	Chromodomain-helicase-DNA-binding protein 3 (CHD-3) (EC 3.6.4.12) (ATP-dependent helicase CHD3) (Mi-2 autoantigen 240 kDa protein) (Mi2-alpha) (Zinc finger helicase) (hZFH)	CHD3	CHD3	2000	2	5.58867	0.00122876	0.000693608	0.000535153	0.000171386	0.000929524	0.000443342	0.000807978	0.226776	medium heterogeneity
Q14839	Chromodomain-helicase-DNA-binding protein 4 (CHD-4) (EC 3.6.4.12) (ATP-dependent helicase CHD4) (Mi-2 autoantigen 218 kDa protein) (Mi2-beta)	CHD4	CHD4	1912	2	5.18457	0.00349764	0.00143835	0.0020593	0.00291233	0.00149408	0.00119583	0.00141952	0.068306	medium heterogeneity
Q8TD26	Chromodomain-helicase-DNA-binding protein 6 (CHD-6) (EC 3.6.4.12) (ATP-dependent helicase CHD6) (Radiation-induced gene B protein)	CHD6	CHD6 CHD5 KIAA1335 RIGB	2715	2	4.93264	0.00461349	0.00351296	0.00110053	0.000886507	0.0024348	-0.0022602	0.00126105	0.142077	medium heterogeneity
Q8NE62	Choline dehydrogenase, mitochondrial (CDH) (CHD) (EC 1.1.99.1)	CHDH	CHDH	594	2	4.94734	0.0083514	0.00299429	0.00535711	0.011766	-0.000143258	0.0026314	0.000550406	0.0136612	medium heterogeneity
O14757	Serine/threonine-protein kinase Chk1 (EC 2.7.11.1) (CHK1 checkpoint homolog) (Cell cycle checkpoint kinase) (Checkpoint kinase-1)	CHEK1	CHEK1 CHK1	476	2	5.96517	0.00751372	0.00162476	0.00588895	0.00941896	0.00226954	0.00615715	0.00324144	0.00819672	variable in BPH
Q8IWX8	Calcium homeostasis endoplasmic reticulum protein (ERPROT 213-21) (SR-related CTD-associated factor 6)	CHERP	CHERP DAN26 SCAF6	916	2	4.84224	0.0120107	0.00822066	0.00379007	-0.000467516	0.00502454	0.0128594	0.00698325	0.0300546	medium heterogeneity
P10645	Chromogranin-A (CgA) (Pituitary secretory protein I) (SP-I) [Cleaved into: Vasostatin-1 (Vasostatin I); Vasostatin-2 (Vasostatin II); EA-92; ES-43; Pancreastatin; SS-18; WA-8; WE-14; LF-19; Catestatin (SL21); AL-11; GV-19; GR-44; ER-37; GE-25; Serpinin-RRG; Serpinin; p-Glu serpinin precursor]	CHGA	CHGA	457	6	5.48227	0.00175547	0.00110617	0.000649297	0.00107414	0.000258378	0.000547522	0.000330664	0.210383	medium heterogeneity
P36222	Chitinase-3-like protein 1 (39 kDa synovial protein) (Cartilage glycoprotein 39) (CGP-39) (GP-39) (hCGP-39) (YKL-40)	CHI3L1	CHI3L1	383	4	5.47241	0.0140767	0.00490781	0.00916887	0.00836385	0.0111575	0.00561809	0.00977264	0.00273224	variable in BPH and ADCA
Q9BWS9	Chitinase domain-containing protein 1 (Stabilin-1-interacting chitinase-like protein) (SI-CLP)	CHID1	CHID1 GL008 PSEC0104 SB139	393	2	4.78913	0.0238697	0.000745607	0.0231241	0.00536226	0.0472812	0.00393787	0.0364454	0.00273224	variable in ADCA
Q13231	Chitotriosidase-1 (EC 3.2.1.14) (Chitinase-1)	CHIT1	CHIT1	466	2	5.55173	0.00389392	0.00175157	0.00214235	0.00234058	0.00166047	0.00299326	0.00199367	0.0655738	medium heterogeneity
O43633	Charged multivesicular body protein 2a (Chromatin-modifying protein 2a) (CHMP2a) (Putative breast adenocarcinoma marker BC-2) (Vacuolar protein sorting-associated protein 2-1) (Vps2-1) (hVps2-1)	CHMP2A	CHMP2A BC2 CHMP2	222	2	5.46833	0.00250174	0.00119909	0.00130265	0.00162262	0.000688166	0.00218621	0.00106268	0.128415	medium heterogeneity
Q9Y3E7	Charged multivesicular body protein 3 (Chromatin-modifying protein 3) (Neuroendocrine differentiation factor) (Vacuolar protein sorting-associated protein 24) (hVps24)	CHMP3	CHMP3 CGI149 NEDF VPS24 CGI-149	222	2	5.67203	0.00582796	0.000949662	0.00487829	0.00599086	0.00159194	0.0113997	0.00404387	0.0191257	medium heterogeneity
Q9BY43	Charged multivesicular body protein 4a (Chromatin-modifying protein 4a) (CHMP4a) (SNF7 homolog associated with Alix-2) (SNF7-1) (hSnf-1) (Vacuolar protein sorting-associated protein 32-1) (Vps32-1) (hVps32-1)	CHMP4A	CHMP4A C14orf123 SHAX2 CDA04 HSPC134	222	2	5.10226	0.00883847	0.00376536	0.0050731	0.00812241	0.0019459	0.00530679	0.00278612	0.0163934	medium heterogeneity
Q9H444	Charged multivesicular body protein 4b (Chromatin-modifying protein 4b) (CHMP4b) (SNF7 homolog associated with Alix 1) (SNF7-2) (hSnf7-2) (Vacuolar protein sorting-associated protein 32-2) (Vps32-2) (hVps32-2)	CHMP4B	CHMP4B C20orf178 SHAX1	224	4	5.01535	0.00436682	0.0022585	0.00210832	0.00140996	0.00290299	0.00181941	0.0026321	0.068306	medium heterogeneity
Q96CF2	Charged multivesicular body protein 4c (Chromatin-modifying protein 4c) (CHMP4c) (SNF7 homolog associated with Alix 3) (SNF7-3) (hSnf7-3) (Vacuolar protein sorting-associated protein 32-3) (Vps32-3) (hVps32-3)	CHMP4C	CHMP4C SHAX3	233	2	5.61159	0.00508477	0.000741048	0.00434373	0.00738101	0.00183797	0.00274917	0.00206577	0.0191257	medium heterogeneity
Q8WUX9	Charged multivesicular body protein 7 (Chromatin-modifying protein 7)	CHMP7	CHMP7	453	2	5.97891	0.00379177	0.00133146	0.0024603	0.00277943	0.00255117	0.00123034	0.00222096	0.0546448	medium heterogeneity
Q99653	Calcineurin B homologous protein 1 (Calcineurin B-like protein) (Calcium-binding protein CHP) (Calcium-binding protein p22) (EF-hand calcium-binding domain-containing protein p22)	CHP1	CHP1 CHP	195	3	5.49778	0.00430077	0.000871445	0.00342933	0.005924	0.00114238	0.00280618	0.00155833	0.0409836	medium heterogeneity
Q8WVB6	Chromosome transmission fidelity protein 18 homolog (hCTF18) (CHL12)	CHTF18	CHTF18 C16orf41 CTF18	975	3	5.24429	0.00294853	0.00230204	0.000646492	0.00209879	-0.000236144	-0.00106248	-0.000442728	0.210383	medium heterogeneity
O15111	Inhibitor of nuclear factor kappa-B kinase subunit alpha (I-kappa-B kinase alpha) (IKK-A) (IKK-alpha) (IkBKA) (IkappaB kinase) (EC 2.7.11.10) (Conserved helix-loop-helix ubiquitous kinase) (I-kappa-B kinase 1) (IKK1) (Nuclear factor NF-kappa-B inhibitor kinase alpha) (NFKBIKA) (Transcription factor 16) (TCF-16)	CHUK	CHUK IKKA TCF16	745	2	6.52436	0.00433208	0.00361354	0.000718535	0.00102906	0.000844067	-0.000589645	0.000485639	0.196721	medium heterogeneity
Q6FI81	Anamorsin (Cytokine-induced apoptosis inhibitor 1) (Fe-S cluster assembly protein DRE2 homolog)	CIAPIN1	CIAPIN1 CUA001 PRO0915	312	2	5.18802	0.00704876	0.00263614	0.00441262	-0.000845699	0.00932271	0.0054573	0.00835635	0.0191257	medium heterogeneity
Q96RK0	Protein capicua homolog	CIC	CIC KIAA0306	1608	2	5.15159	0.00262122	0.00141198	0.00120924	0.00237443	0.000701836	-0.000764153	0.000335339	0.131148	medium heterogeneity
Q14011	Cold-inducible RNA-binding protein (A18 hnRNP) (Glycine-rich RNA-binding protein CIRP)	CIRBP	CIRBP A18HNRNP CIRP	172	2	5.3741	0.0096644	0.000874256	0.00879015	0.00746198	0.0103593	0.00806734	0.00978628	0.00273224	variable in BPH and ADCA
Q9NZ45	CDGSH iron-sulfur domain-containing protein 1 (MitoNEET)	CISD1	CISD1 C10orf70 ZCD1 MDS029	108	3	5.25375	0.000931438	0.000570604	0.000360834	8.1e-05	0.000443566	0.000952262	0.00057074	0.303279	medium heterogeneity
Q9ULV3	Cip1-interacting zinc finger protein (CDKN1A-interacting zinc finger protein 1) (Nuclear protein NP94) (Zinc finger protein 356)	CIZ1	CIZ1 LSFR1 NP94 ZNF356	898	3	5.41891	0.0025425	0.00066092	0.00188158	0.00174693	0.00119771	0.00433713	0.00198257	0.0765027	medium heterogeneity
Q07065	Cytoskeleton-associated protein 4 (63-kDa cytoskeleton-linking membrane protein) (Climp-63) (p63)	CKAP4	CKAP4	602	6	4.98056	0.00239666	0.00086699	0.00152967	0.00140362	0.00223873	-0.000219382	0.00162421	0.101093	medium heterogeneity
Q14008	Cytoskeleton-associated protein 5 (Colonic and hepatic tumor overexpressed gene protein) (Ch-TOG)	CKAP5	CKAP5 KIAA0097	2032	6	5.56333	0.00119063	0.000607507	0.000583119	0.000168579	0.000985342	0.000620072	0.000894024	0.224044	medium heterogeneity
P12277	Creatine kinase B-type (EC 2.7.3.2) (Brain creatine kinase) (B-CK) (Creatine kinase B chain) (Creatine phosphokinase B-type) (CPK-B)	CKB	CKB CKBB	381	23	5.59017	0.00886614	0.00034724	0.0085189	0.0148759	0.00474895	0.000757624	0.00375112	0.00273224	variable in BPH
P06732	Creatine kinase M-type (EC 2.7.3.2) (Creatine kinase M chain) (Creatine phosphokinase M-type) (CPK-M) (M-CK)	CKM	CKM CKMM	381	3	5.47712	0.0116582	0.00161936	0.0100388	0.0148739	0.00766829	0.00264527	0.00641253	0.00273224	variable in BPH
P12532	Creatine kinase U-type, mitochondrial (EC 2.7.3.2) (Acidic-type mitochondrial creatine kinase) (Mia-CK) (Ubiquitous mitochondrial creatine kinase) (U-MtCK)	CKMT1A	CKMT1A CKMT; CKMT1B CKMT	417	4	5.20448	0.00175791	0.00141477	0.000343143	-0.000739029	0.00175899	-0.000657868	0.00115477	0.314208	medium heterogeneity
P17540	Creatine kinase S-type, mitochondrial (EC 2.7.3.2) (Basic-type mitochondrial creatine kinase) (Mib-CK) (Sarcomeric mitochondrial creatine kinase) (S-MtCK)	CKMT2	CKMT2	419	2	6.01824	0.00602598	0.00384651	0.00217947	0.0055995	0.000427592	-0.00282497	-0.000385548	0.0601093	medium heterogeneity
Q7Z460	CLIP-associating protein 1 (Cytoplasmic linker-associated protein 1) (Multiple asters homolog 1) (Protein Orbit homolog 1) (hOrbit1)	CLASP1	CLASP1 KIAA0622 MAST1	1538	3	5.39845	0.0114095	0.00840987	0.0029996	0.00223967	0.00218348	0.00772778	0.00356955	0.0409836	medium heterogeneity
O75122	CLIP-associating protein 2 (Cytoplasmic linker-associated protein 2) (Protein Orbit homolog 2) (hOrbit2)	CLASP2	CLASP2 KIAA0627	1294	2	5.60809	0.00891216	0.000915973	0.00799618	0.0139704	0.00200743	0.00803969	0.00351549	0.00273224	variable in BPH
Q05315	Galectin-10 (Gal-10) (Charcot-Leyden crystal protein) (CLC) (Eosinophil lysophospholipase) (Lysolecithin acylhydrolase)	CLC	CLC LGALS10 LGALS10A	142	2	5.64015	0.00422698	0.00418973	3.73e-05	0.00139064	-0.0015138	0.000630279	-0.000977781	0.469945	stable in BPH and ADCA
A8K7I4	Calcium-activated chloride channel regulator 1 (EC 3.4.-.-) (Calcium-activated chloride channel family member 1) (hCLCA1) (Calcium-activated chloride channel protein 1) (CaCC-1) (hCaCC-1)	CLCA1	CLCA1 CACC1	914	4	6.25848	0.00318245	0.000602069	0.00258038	0.00456384	0.000441247	0.00304744	0.00109279	0.0519126	medium heterogeneity
P51790	H(+)/Cl(-) exchange transporter 3 (Chloride channel protein 3) (ClC-3) (Chloride transporter ClC-3)	CLCN3	CLCN3	818	3	5.53518	0.00303572	0.0019595	0.00107621	0.00313398	-0.000351862	-0.000812849	-0.000467108	0.144809	medium heterogeneity
O15551	Claudin-3 (Clostridium perfringens enterotoxin receptor 2) (CPE-R 2) (CPE-receptor 2) (Rat ventral prostate.1 protein homolog) (hRVP1)	CLDN3	CLDN3 C7orf1 CPETR2	220	2	5.32518	0.0109861	0.00650185	0.00448424	0.0030117	0.00822717	-0.00232693	0.00558865	0.0191257	medium heterogeneity
Q9Y240	C-type lectin domain family 11 member A (C-type lectin superfamily member 3) (Lymphocyte secreted C-type lectin) (Osteolectin) (Stem cell growth factor) (p47)	CLEC11A	CLEC11A CLECSF3 LSLCL SCGF	323	3	5.86702	0.00420018	0.000741515	0.00345867	0.00343253	0.00258465	0.00615911	0.00347827	0.0409836	medium heterogeneity
P05452	Tetranectin (TN) (C-type lectin domain family 3 member B) (Plasminogen kringle 4-binding protein)	CLEC3B	CLEC3B TNA	202	3	5.55935	0.0043077	0.00107888	0.00322882	0.00300423	0.00133916	0.00957156	0.00339726	0.0409836	medium heterogeneity
O00299	Chloride intracellular channel protein 1 (Chloride channel ABP) (Nuclear chloride ion channel 27) (NCC27) (Regulatory nuclear chloride ion channel protein) (hRNCC)	CLIC1	CLIC1 G6 NCC27	241	9	5.56414	0.00477084	0.000320428	0.00445041	0.00515007	0.00235012	0.00865231	0.00392567	0.0191257	medium heterogeneity
O95833	Chloride intracellular channel protein 3	CLIC3	CLIC3	236	2	5.59896	0.00351339	0.00239282	0.00112057	0.00155768	0.000835585	0.000664222	0.000792744	0.139344	medium heterogeneity
Q9Y696	Chloride intracellular channel protein 4 (Intracellular chloride ion channel protein p64H1)	CLIC4	CLIC4	253	6	5.401	0.00197095	0.000280768	0.00169018	0.00247669	0.000783913	0.00204944	0.0011003	0.0901639	medium heterogeneity
Q14677	Clathrin interactor 1 (Clathrin-interacting protein localized in the trans-Golgi region) (Clint) (Enthoprotin) (Epsin-4) (Epsin-related protein) (EpsinR)	CLINT1	CLINT1 ENTH EPN4 EPNR KIAA0171	625	3	5.20944	0.00270048	0.00071403	0.00198645	0.00174253	0.00238206	0.0015314	0.0021694	0.0710383	medium heterogeneity
P30622	CAP-Gly domain-containing linker protein 1 (Cytoplasmic linker protein 1) (Cytoplasmic linker protein 170 alpha-2) (CLIP-170) (Reed-Sternberg intermediate filament-associated protein) (Restin)	CLIP1	CLIP1 CYLN1 RSN	1438	3	5.06343	0.00347985	0.00142328	0.00205657	0.00041453	0.000341513	0.0121279	0.00328811	0.068306	medium heterogeneity
Q16740	ATP-dependent Clp protease proteolytic subunit, mitochondrial (EC 3.4.21.92) (Endopeptidase Clp)	CLPP	CLPP	277	2	5.13488	0.00651208	0.00330317	0.00320891	-0.000705873	0.00824578	-0.000157359	0.006145	0.0409836	medium heterogeneity
O96005	Cleft lip and palate transmembrane protein 1	CLPTM1	CLPTM1	669	2	5.45522	0.00736672	0.00298133	0.00438539	0.00302303	0.00643938	0.00231048	0.00540716	0.0191257	medium heterogeneity
P09497	Clathrin light chain B (Lcb)	CLTB	CLTB	229	2	5.43599	0.00416586	0.00103855	0.00312731	0.00432335	0.0012064	0.00530192	0.00223028	0.0409836	medium heterogeneity
Q00610	Clathrin heavy chain 1 (Clathrin heavy chain on chromosome 17) (CLH-17)	CLTC	CLTC CLH17 CLTCL2 KIAA0034	1675	45	5.15165	0.00196002	0.000645501	0.00131452	1.68e-05	0.000755211	0.00688551	0.00228779	0.125683	medium heterogeneity
P10909	Clusterin (Aging-associated gene 4 protein) (Apolipoprotein J) (Apo-J) (Complement cytolysis inhibitor) (CLI) (Complement-associated protein SP-40,40) (Ku70-binding protein 1) (NA1/NA2) (Testosterone-repressed prostate message 2) (TRPM-2) [Cleaved into: Clusterin beta chain (ApoJalpha) (Complement cytolysis inhibitor a chain); Clusterin alpha chain (ApoJbeta) (Complement cytolysis inhibitor b cha…	CLU	CLU APOJ CLI KUB1 AAG4	449	19	5.4294	0.0170508	0.000723559	0.0163273	0.0245402	0.0123853	0.00351447	0.0101676	0.00273224	variable in BPH
O75153	Clustered mitochondria protein homolog	CLUH	CLUH KIAA0664	1309	2	5.04444	0.00824985	0.00740048	0.000849362	-0.00125539	0.00144226	0.00538493	0.00242793	0.180328	medium heterogeneity
P23946	Chymase (EC 3.4.21.39) (Alpha-chymase) (Mast cell protease I)	CMA1	CMA1 CYH CYM	247	3	5.33672	0.00265792	0.000506838	0.00215108	0.00250429	0.00146016	0.00316424	0.00188618	0.0655738	medium heterogeneity
Q8NFW8	N-acylneuraminate cytidylyltransferase (EC 2.7.7.43) (CMP-N-acetylneuraminic acid synthase) (CMP-NeuNAc synthase)	CMAS	CMAS	434	3	4.85883	0.00358679	0.00219993	0.00138686	0.000658444	-0.000249923	0.00848245	0.00193317	0.114754	medium heterogeneity
Q96DG6	Carboxymethylenebutenolidase homolog (EC 3.1.-.-)	CMBL	CMBL	245	4	4.50364	0.00928852	0.0084722	0.00081632	0.000880211	0.000145337	0.0026376	0.000768401	0.185792	medium heterogeneity
P30085	UMP-CMP kinase (EC 2.7.4.14) (Deoxycytidylate kinase) (CK) (dCMP kinase) (Nucleoside-diphosphate kinase) (EC 2.7.4.6) (Uridine monophosphate/cytidine monophosphate kinase) (UMP/CMP kinase) (UMP/CMPK)	CMPK1	CMPK1 CMK CMPK UCK UMK UMPK	196	6	5.26649	0.00204645	0.000614382	0.00143207	0.000905908	0.00185324	0.00174704	0.00182669	0.112022	medium heterogeneity
Q8N1G2	Cap-specific mRNA (nucleoside-2'-O-)-methyltransferase 1 (EC 2.1.1.57) (Cap methyltransferase 1) (Cap1 2'O-ribose methyltransferase 1) (MTr1) (hMTr1) (FtsJ methyltransferase domain-containing protein 2) (Interferon-stimulated gene 95 kDa protein) (ISG95)	CMTR1	CMTR1 FTSJD2 KIAA0082 MTR1	835	3	5.30932	0.00621601	0.000704331	0.00551168	0.0063546	0.00471701	0.0053669	0.00487948	0.010929	medium heterogeneity
P62633	Cellular nucleic acid-binding protein (CNBP) (Zinc finger protein 9)	CNBP	CNBP RNF163 ZNF9	177	2	5.28629	0.00353802	0.00264039	0.000897631	0.00147563	0.000334757	0.000852245	0.000464129	0.174863	medium heterogeneity
Q96KN2	Beta-Ala-His dipeptidase (EC 3.4.13.20) (CNDP dipeptidase 1) (Carnosine dipeptidase 1) (Glutamate carboxypeptidase-like protein 2) (Serum carnosinase)	CNDP1	CNDP1 CN1 CPGL2 UNQ1915/PRO4380	507	2	4.91491	0.00536782	0.00131227	0.00405555	0.00220067	0.00618708	0.00322565	0.00544672	0.0273224	medium heterogeneity
Q96KP4	Cytosolic non-specific dipeptidase (EC 3.4.13.18) (CNDP dipeptidase 2) (Carnosine dipeptidase II) (Epididymis secretory protein Li 13) (Glutamate carboxypeptidase-like protein 1) (Peptidase A)	CNDP2	CNDP2 CN2 CPGL HEL-S-13 PEPA	475	24	5.51809	0.00776647	0.0006934	0.00707306	0.00972926	0.0015194	0.0157655	0.00508092	0.00273224	variable in BPH and ADCA
P51911	Calponin-1 (Basic calponin) (Calponin H1, smooth muscle)	CNN1	CNN1	297	27	5.90949	0.0160373	0.00021146	0.0158258	0.0276904	0.00429552	0.014823	0.00692739	0.00273224	variable in BPH
Q99439	Calponin-2 (Calponin H2, smooth muscle) (Neutral calponin)	CNN2	CNN2	309	2	5.33017	0.00617433	0.00175355	0.00442078	0.00720114	0.00251542	0.00179578	0.00233551	0.0191257	medium heterogeneity
Q15417	Calponin-3 (Calponin, acidic isoform)	CNN3	CNN3	329	7	5.37196	0.00229323	0.00189738	0.000395844	0.000526122	-0.000500415	0.00269378	0.000298135	0.286885	medium heterogeneity
A5YKK6	CCR4-NOT transcription complex subunit 1 (CCR4-associated factor 1) (Negative regulator of transcription subunit 1 homolog) (NOT1H) (hNOT1)	CNOT1	CNOT1 CDC39 KIAA1007 NOT1 AD-005	2376	4	5.87026	0.00721616	0.000381326	0.00683484	0.00941874	0.00358964	0.00881871	0.00489691	0.00546448	variable in BPH and ADCA
Q9H9A5	CCR4-NOT transcription complex subunit 10	CNOT10	CNOT10	744	2	5.15425	0.00617912	0.0018203	0.00435883	0.00323875	0.00614209	0.00236927	0.00519889	0.0191257	medium heterogeneity
O75175	CCR4-NOT transcription complex subunit 3 (CCR4-associated factor 3) (Leukocyte receptor cluster member 2)	CNOT3	CNOT3 KIAA0691 LENG2 NOT3	753	2	5.13407	0.00939722	0.00382515	0.00557207	0.00918885	0.00414302	-0.000991145	0.00285948	0.010929	medium heterogeneity
P09543	2',3'-cyclic-nucleotide 3'-phosphodiesterase (CNP) (CNPase) (EC 3.1.4.37)	CNP	CNP	421	8	5.14278	0.00196915	0.0010604	0.000908745	-1.06e-05	0.000661602	0.00440834	0.00159829	0.172131	medium heterogeneity
Q9BT09	Protein canopy homolog 3 (CTG repeat protein 4a) (Expanded repeat-domain protein CAG/CTG 5) (Protein associated with TLR4) (Trinucleotide repeat-containing gene 5 protein)	CNPY3	CNPY3 CTG4A ERDA5 PRAT4A TNRC5 HSPC084 UNQ1934/PRO4409	278	2	5.33864	0.0226142	0.018672	0.00394218	0.00599199	0.00135394	0.00555744	0.00240482	0.0300546	medium heterogeneity
Q96F85	CB1 cannabinoid receptor-interacting protein 1 (CRIP-1)	CNRIP1	CNRIP1 C2orf32	164	3	4.96465	0.00999593	0.00381447	0.00618146	0.00711867	0.00464501	0.00797918	0.00547856	0.00819672	variable in BPH and ADCA
Q9Y2R0	Cytochrome c oxidase assembly factor 3 homolog, mitochondrial (Coiled-coil domain-containing protein 56) (Mitochondrial translation regulation assembly intermediate of cytochrome c oxidase protein of 12 kDa)	COA3	COA3 CCDC56 MITRAC12 HSPC009	106	2	5.47057	0.00926997	0.00113661	0.00813336	0.0144982	0.00276849	0.00513351	0.00335974	0.00273224	variable in BPH
Q5JTJ3	Cytochrome c oxidase assembly factor 6 homolog	COA6	COA6 C1orf31	125	2	5.20407	0.00189744	0.00131289	0.000584547	-0.000670702	0.00121636	0.00245486	0.00152598	0.224044	medium heterogeneity
Q96BR5	Cytochrome c oxidase assembly factor 7 (Beta-lactamase hcp-like protein) (Respiratory chain assembly factor 1) (Sel1 repeat-containing protein 1)	COA7	COA7 C1orf163 RESA1 SELRC1	231	3	5.40554	0.00481584	0.00102725	0.00378859	0.00162137	0.00606389	0.00346436	0.00541401	0.0300546	medium heterogeneity
Q13057	Bifunctional coenzyme A synthase (CoA synthase) (NBP) (POV-2) [Includes: Phosphopantetheine adenylyltransferase (EC 2.7.7.3) (Dephospho-CoA pyrophosphorylase) (Pantetheine-phosphate adenylyltransferase) (PPAT); Dephospho-CoA kinase (DPCK) (EC 2.7.1.24) (Dephosphocoenzyme A kinase) (DPCOAK)]	COASY	COASY PSEC0106	564	2	4.41188	0.00987792	0.00796799	0.00190993	0.00199287	0.00313296	-0.00200795	0.00184773	0.0765027	medium heterogeneity
Q53SF7	Cordon-bleu protein-like 1	COBLL1	COBLL1 KIAA0977	1204	4	5.58917	0.00144096	0.000110559	0.0013304	0.00120089	0.00171765	0.000557177	0.00142753	0.125683	medium heterogeneity
O43405	Cochlin (COCH-5B2)	COCH	COCH COCH5B2 UNQ257/PRO294	550	2	4.86846	0.00874313	0.00746593	0.0012772	0.000975646	-0.000449886	0.00736311	0.00150336	0.128415	medium heterogeneity
Q8WTW3	Conserved oligomeric Golgi complex subunit 1 (COG complex subunit 1) (Component of oligomeric Golgi complex 1)	COG1	COG1 KIAA1381 LDLB	980	4	6.12085	0.0138903	0.000277301	0.013613	0.0221737	0.00595235	0.0109125	0.00719239	0.00273224	variable in BPH
Q96JB2	Conserved oligomeric Golgi complex subunit 3 (COG complex subunit 3) (Component of oligomeric Golgi complex 3) (Vesicle-docking protein SEC34 homolog) (p94)	COG3	COG3 SEC34	828	2	5.61428	0.00280502	0.00107748	0.00172754	-0.000186574	0.000419668	0.0113935	0.00316312	0.0874317	medium heterogeneity
Q9H9E3	Conserved oligomeric Golgi complex subunit 4 (COG complex subunit 4) (Component of oligomeric Golgi complex 4)	COG4	COG4	785	2	5.02037	0.00206903	0.000791417	0.00127761	0.00084639	0.0015535	0.00174363	0.00160103	0.128415	medium heterogeneity
Q9UP83	Conserved oligomeric Golgi complex subunit 5 (COG complex subunit 5) (13S Golgi transport complex 90 kDa subunit) (GTC-90) (Component of oligomeric Golgi complex 5) (Golgi transport complex 1)	COG5	COG5 GOLTC1 GTC90	839	2	5.95331	0.00307465	0.00134995	0.0017247	0.000162643	0.00361115	0.000751549	0.00289625	0.0874317	medium heterogeneity
Q9Y2V7	Conserved oligomeric Golgi complex subunit 6 (COG complex subunit 6) (Component of oligomeric Golgi complex 6)	COG6	COG6 KIAA1134	657	2	5.08563	0.00313982	0.00248305	0.000656767	0.00149894	-0.000817819	0.00255401	2.51e-05	0.20765	medium heterogeneity
P38432	Coilin (p80-coilin)	COIL	COIL CLN80	576	2	5.34639	0.00423647	0.00173953	0.00249694	7.24e-05	0.00184319	0.011732	0.00431538	0.0546448	medium heterogeneity
Q99715	Collagen alpha-1(XII) chain	COL12A1	COL12A1 COL12A1L	3063	21	5.16447	0.00860445	0.000352672	0.00825178	0.0141486	0.00393288	0.00351796	0.00382915	0.00273224	variable in BPH
Q05707	Collagen alpha-1(XIV) chain (Undulin)	COL14A1	COL14A1 UND	1796	55	5.55886	0.00693654	0.0031556	0.00378094	0.00588683	0.00209997	0.00250623	0.00220154	0.0300546	medium heterogeneity
P39059	Collagen alpha-1(XV) chain [Cleaved into: Restin (Endostatin-XV) (Related to endostatin) (Restin-I); Restin-2 (Restin-II); Restin-3 (Restin-III); Restin-4 (Restin-IV)]	COL15A1	COL15A1	1388	6	5.14419	0.00166324	0.00102528	0.000637957	0.000563508	0.000969361	-0.000132906	0.000693795	0.210383	medium heterogeneity
P39060	Collagen alpha-1(XVIII) chain [Cleaved into: Endostatin; Non-collagenous domain 1 (NC1)]	COL18A1	COL18A1	1754	9	5.2622	0.00110655	0.000267739	0.000838815	0.000567385	0.000984325	0.00121657	0.00104239	0.18306	medium heterogeneity
P02452	Collagen alpha-1(I) chain (Alpha-1 type I collagen)	COL1A1	COL1A1	1464	7	5.6787	0.00713229	0.00028533	0.00684696	0.0052629	0.00945616	0.00377157	0.00803501	0.00546448	variable in BPH and ADCA
P08123	Collagen alpha-2(I) chain (Alpha-2 type I collagen)	COL1A2	COL1A2	1366	4	5.69871	0.00181794	0.000492769	0.00132517	0.000382346	0.00191334	0.00238911	0.00203229	0.125683	medium heterogeneity
P02461	Collagen alpha-1(III) chain	COL3A1	COL3A1	1466	3	5.5197	0.002033	0.000500966	0.00153203	0.0034408	0.00016786	-0.000101749	0.000100457	0.101093	medium heterogeneity
P08572	Collagen alpha-2(IV) chain [Cleaved into: Canstatin]	COL4A2	COL4A2	1712	3	5.38258	0.00385107	0.000493732	0.00335733	0.00298053	0.0030225	0.00549226	0.00363994	0.0409836	medium heterogeneity
Q9Y5P4	Collagen type IV alpha-3-binding protein (Ceramide transfer protein) (hCERT) (Goodpasture antigen-binding protein) (GPBP) (START domain-containing protein 11) (StARD11) (StAR-related lipid transfer protein 11)	COL4A3BP	COL4A3BP CERT STARD11	624	2	5.78193	0.00483727	0.00252846	0.00230881	0.00260597	0.00275503	7.86e-05	0.00208593	0.057377	medium heterogeneity
P05997	Collagen alpha-2(V) chain	COL5A2	COL5A2	1499	2	4.99687	0.0098687	0.00594795	0.00392074	-0.00317184	0.0103363	0.00595168	0.00924018	0.0300546	medium heterogeneity
P12109	Collagen alpha-1(VI) chain	COL6A1	COL6A1	1028	20	5.6606	0.00843345	0.000304058	0.0081294	0.00779659	0.0105571	0.00184472	0.00837901	0.00273224	variable in BPH and ADCA
P12110	Collagen alpha-2(VI) chain	COL6A2	COL6A2	1019	12	5.7443	0.00867997	0.000268736	0.00841123	0.00904357	0.0100906	0.00147601	0.00793698	0.00273224	variable in BPH and ADCA
P12111	Collagen alpha-3(VI) chain	COL6A3	COL6A3	3177	61	5.80498	0.00735905	0.000172922	0.00718613	0.00439784	0.0117479	0.00186566	0.00927735	0.00273224	variable in ADCA
Q02388	Collagen alpha-1(VII) chain (Long-chain collagen) (LC collagen)	COL7A1	COL7A1	2944	2	5.71724	0.0399009	0.0267097	0.0131912	0.0149874	0.0176993	-0.00572161	0.0118441	0.00273224	variable in BPH and ADCA
Q8NBJ5	Procollagen galactosyltransferase 1 (EC 2.4.1.50) (Collagen beta(1-O)galactosyltransferase 1) (ColGalT 1) (Glycosyltransferase 25 family member 1) (Hydroxylysine galactosyltransferase 1)	COLGALT1	COLGALT1 GLT25D1 PSEC0241	622	3	5.39481	0.00689418	0.000478064	0.00641612	0.0100158	0.00218793	0.00830158	0.00371635	0.00819672	variable in BPH
Q86X83	COMM domain-containing protein 2	COMMD2	COMMD2 HSPC042 My004	199	2	5.18528	0.0186875	0.0013826	0.0173049	0.0116089	0.0258842	0.00865533	0.021577	0.00273224	variable in BPH and ADCA
Q9UBI1	COMM domain-containing protein 3 (Protein Bup) (Protein PIL)	COMMD3	COMMD3 BUP C10orf8	195	2	6.01265	0.0119599	0.0039036	0.00805635	0.0109422	0.00512326	0.008198	0.00589195	0.00273224	variable in BPH and ADCA
P53621	Coatomer subunit alpha (Alpha-coat protein) (Alpha-COP) (HEP-COP) (HEPCOP) [Cleaved into: Xenin (Xenopsin-related peptide); Proxenin]	COPA	COPA	1224	25	5.05466	0.00165924	0.000721152	0.000938089	0.000127005	1.59e-05	0.00613805	0.0015464	0.166667	medium heterogeneity
P53618	Coatomer subunit beta (Beta-coat protein) (Beta-COP)	COPB1	COPB1 COPB MSTP026	953	10	5.08892	0.00562301	0.000890899	0.00473211	0.0031208	0.0023799	0.0166227	0.00594059	0.0191257	medium heterogeneity
P35606	Coatomer subunit beta' (Beta'-coat protein) (Beta'-COP) (p102)	COPB2	COPB2	906	12	5.07794	0.00248454	0.00143385	0.00105069	0.00105911	-0.000158607	0.00465332	0.00104437	0.147541	medium heterogeneity
O14579	Coatomer subunit epsilon (Epsilon-coat protein) (Epsilon-COP)	COPE	COPE	308	5	5.05118	0.00170134	0.000274788	0.00142655	0.00196571	0.000510558	0.00255706	0.00102218	0.112022	medium heterogeneity
Q9Y678	Coatomer subunit gamma-1 (Gamma-1-coat protein) (Gamma-1-COP)	COPG1	COPG1 COPG	874	11	5.22484	0.00171988	0.000308703	0.00141117	0.00137411	0.0007658	0.00345849	0.00143897	0.114754	medium heterogeneity
Q9UBF2	Coatomer subunit gamma-2 (Gamma-2-coat protein) (Gamma-2-COP)	COPG2	COPG2	871	6	6.00744	0.00392147	0.00043212	0.00348935	0.00569716	0.00243971	1.48e-05	0.00183349	0.0382514	medium heterogeneity
P61201	COP9 signalosome complex subunit 2 (SGN2) (Signalosome subunit 2) (Alien homolog) (JAB1-containing signalosome subunit 2) (Thyroid receptor-interacting protein 15) (TR-interacting protein 15) (TRIP-15)	COPS2	COPS2 CSN2 TRIP15	443	3	5.40829	0.000985384	0.000900422	8.5e-05	-0.000538063	0.000702403	0.000101711	0.00055223	0.453552	stable in BPH and ADCA
Q9UNS2	COP9 signalosome complex subunit 3 (SGN3) (Signalosome subunit 3) (JAB1-containing signalosome subunit 3)	COPS3	COPS3 CSN3	423	2	5.23513	0.00945638	0.00180482	0.00765156	0.00359294	0.00943383	0.0144806	0.0106955	0.00273224	variable in ADCA
Q9BT78	COP9 signalosome complex subunit 4 (SGN4) (Signalosome subunit 4) (JAB1-containing signalosome subunit 4)	COPS4	COPS4 CSN4	406	3	5.05641	0.00465034	0.00121247	0.00343788	0.00262537	0.00474988	0.00193938	0.00404725	0.0409836	medium heterogeneity
Q92905	COP9 signalosome complex subunit 5 (SGN5) (Signalosome subunit 5) (EC 3.4.-.-) (Jun activation domain-binding protein 1)	COPS5	COPS5 CSN5 JAB1	334	5	5.22825	0.00365945	0.00136866	0.00229079	0.00235853	0.00119149	0.0053855	0.00223999	0.0601093	medium heterogeneity
Q9UBW8	COP9 signalosome complex subunit 7a (SGN7a) (Signalosome subunit 7a) (Dermal papilla-derived protein 10) (JAB1-containing signalosome subunit 7a)	COPS7A	COPS7A CSN7A DERP10	275	3	3.94259	0.0100505	0.00772301	0.00232745	-0.000781623	0.00810059	-0.00566472	0.00465926	0.057377	medium heterogeneity
Q99627	COP9 signalosome complex subunit 8 (SGN8) (Signalosome subunit 8) (COP9 homolog) (hCOP9) (JAB1-containing signalosome subunit 8)	COPS8	COPS8 CSN8	209	2	4.88646	0.0163812	0.000820071	0.0155611	0.0227944	0.0046588	0.0265683	0.0101362	0.00273224	variable in BPH
P61923	Coatomer subunit zeta-1 (Zeta-1-coat protein) (Zeta-1 COP)	COPZ1	COPZ1 COPZ CGI-120 HSPC181	177	7	5.05232	0.00135285	0.00133016	2.27e-05	-0.000488995	0.00013175	0.00123054	0.000406446	0.478142	stable in BPH and ADCA
Q5HYK3	2-methoxy-6-polyprenyl-1,4-benzoquinol methylase, mitochondrial (EC 2.1.1.201) (Ubiquinone biosynthesis methyltransferase COQ5)	COQ5	COQ5	327	2	5.28678	0.00163918	0.00071766	0.000921516	0.000704157	0.00101839	0.00128297	0.00108454	0.169399	medium heterogeneity
Q96D53	Atypical kinase COQ8B, mitochondrial (EC 2.7.-.-) (AarF domain-containing protein kinase 4) (Coenzyme Q protein 8B)	COQ8B	COQ8B ADCK4	544	2	5.68526	0.00135082	0.000916116	0.000434706	0.00045265	0.000647655	-0.000257971	0.000421249	0.26776	medium heterogeneity
O75208	Ubiquinone biosynthesis protein COQ9, mitochondrial	COQ9	COQ9 C16orf49 HSPC326 PSEC0129	318	2	4.62626	0.00852585	0.00479543	0.00373042	0.000333443	0.00615761	0.00663978	0.00627816	0.0300546	medium heterogeneity
P31146	Coronin-1A (Coronin-like protein A) (Clipin-A) (Coronin-like protein p57) (Tryptophan aspartate-containing coat protein) (TACO)	CORO1A	CORO1A CORO1	461	3	5.27136	0.00831204	0.00299518	0.00531686	0.0083264	0.00323065	0.00254688	0.00305971	0.0136612	medium heterogeneity
Q9BR76	Coronin-1B (Coronin-2)	CORO1B	CORO1B	489	13	5.296	0.00321124	0.000320285	0.00289096	0.00223578	0.0025294	0.00594115	0.00338234	0.0409836	medium heterogeneity
Q9ULV4	Coronin-1C (Coronin-3) (hCRNN4)	CORO1C	CORO1C CRN2 CRNN4	474	3	5.16799	0.0124004	0.00208186	0.0103186	0.0126984	0.00528315	0.0182855	0.00853373	0.00273224	variable in BPH and ADCA
Q92828	Coronin-2A (IR10) (WD repeat-containing protein 2)	CORO2A	CORO2A IR10 WDR2	525	4	5.35983	0.00729604	0.0018154	0.00548064	0.00947495	0.000585879	0.00818198	0.0024849	0.010929	medium heterogeneity
P57737	Coronin-7 (Crn7) (70 kDa WD repeat tumor rejection antigen homolog)	CORO7	CORO7	925	3	5.72543	0.00431175	0.000462605	0.00384915	0.00484193	0.00321246	0.00278085	0.00310456	0.0300546	medium heterogeneity
Q14019	Coactosin-like protein	COTL1	COTL1 CLP	142	2	5.47963	0.00415769	0.00111288	0.00304481	0.0055964	0.00139872	0.000328289	0.00113111	0.0409836	medium heterogeneity
P13073	Cytochrome c oxidase subunit 4 isoform 1, mitochondrial (Cytochrome c oxidase polypeptide IV) (Cytochrome c oxidase subunit IV isoform 1) (COX IV-1)	COX4I1	COX4I1 COX4	169	5	5.46961	0.00695845	0.000710765	0.00624769	0.0109465	0.00131102	0.00696114	0.00272355	0.00819672	variable in BPH
P20674	Cytochrome c oxidase subunit 5A, mitochondrial (Cytochrome c oxidase polypeptide Va)	COX5A	COX5A	150	6	5.32868	0.00185149	0.000361388	0.0014901	0.000779645	0.00132866	0.0041058	0.00202294	0.103825	medium heterogeneity
P10606	Cytochrome c oxidase subunit 5B, mitochondrial (Cytochrome c oxidase polypeptide Vb)	COX5B	COX5B	129	5	5.52495	0.0032909	0.000919789	0.00237111	0.00112529	0.00407446	0.000998519	0.00330548	0.057377	medium heterogeneity
P14854	Cytochrome c oxidase subunit 6B1 (Cytochrome c oxidase subunit VIb isoform 1) (COX VIb-1)	COX6B1	COX6B1 COX6B	86	4	5.4095	0.00462694	0.0020161	0.00261084	0.000534796	0.00446147	0.00328706	0.00416787	0.0519126	medium heterogeneity
P09669	Cytochrome c oxidase subunit 6C (Cytochrome c oxidase polypeptide VIc)	COX6C	COX6C	75	2	5.41907	0.00962077	0.00203552	0.00758525	0.0120967	0.00289556	0.00811993	0.00420165	0.00273224	variable in BPH
P14406	Cytochrome c oxidase subunit 7A2, mitochondrial (Cytochrome c oxidase subunit VIIa-liver/heart) (Cytochrome c oxidase subunit VIIa-L) (Cytochrome c oxidase subunit VIIaL)	COX7A2	COX7A2 COX7AL	83	3	5.55697	0.00567886	0.000245616	0.00543324	0.00447419	0.00700814	0.00358571	0.00615253	0.010929	medium heterogeneity
P15088	Mast cell carboxypeptidase A (MC-CPA) (EC 3.4.17.1) (Carboxypeptidase A3)	CPA3	CPA3	417	2	5.36243	0.00869926	0.00474388	0.00395538	0.00317733	0.00580584	0.000738137	0.00453891	0.0300546	medium heterogeneity
P16870	Carboxypeptidase E (CPE) (EC 3.4.17.10) (Carboxypeptidase H) (CPH) (Enkephalin convertase) (Prohormone-processing carboxypeptidase)	CPE	CPE	476	6	5.66221	0.00302758	0.000407982	0.0026196	0.00413006	0.000912335	0.00321	0.00148675	0.0519126	medium heterogeneity
P22792	Carboxypeptidase N subunit 2 (Carboxypeptidase N 83 kDa chain) (Carboxypeptidase N large subunit) (Carboxypeptidase N polypeptide 2) (Carboxypeptidase N regulatory subunit)	CPN2	CPN2 ACBP	545	2	5.57983	0.0113623	0.00215678	0.00920548	0.0055085	0.0131424	0.00848578	0.0119782	0.00273224	variable in ADCA
Q99829	Copine-1 (Chromobindin 17) (Copine I)	CPNE1	CPNE1 CPN1	537	7	4.05208	0.00253498	0.00203532	0.000499659	0.0011007	-0.000436583	0.00150526	4.89e-05	0.234973	medium heterogeneity
O75131	Copine-3 (Copine III)	CPNE3	CPNE3 CPN3 KIAA0636	537	4	5.01402	0.00250201	0.00120275	0.00129926	0.00157161	0.00111388	0.00103836	0.001095	0.128415	medium heterogeneity
Q9BRF8	Serine/threonine-protein phosphatase CPPED1 (EC 3.1.3.16) (Calcineurin-like phosphoesterase domain-containing protein 1) (Complete S-transactivated protein 1)	CPPED1	CPPED1 CSTP1	314	2	5.51691	0.0229546	0.00189625	0.0210583	0.0268586	0.0102641	0.0360401	0.0167081	0.00273224	variable in BPH and ADCA
Q9Y646	Carboxypeptidase Q (EC 3.4.17.-) (Lysosomal dipeptidase) (Plasma glutamate carboxypeptidase)	CPQ	CPQ LCH1 PGCP	472	2	5.57445	0.00577039	0.00264022	0.00313017	0.00557651	-0.000245128	0.00591705	0.00129542	0.0409836	medium heterogeneity
P31327	Carbamoyl-phosphate synthase [ammonia], mitochondrial (EC 6.3.4.16) (Carbamoyl-phosphate synthetase I) (CPSase I)	CPS1	CPS1	1500	3	4.96417	0.00595114	0.00535324	0.000597895	0.00275605	-0.000738941	-0.00186605	-0.00102072	0.221311	medium heterogeneity
Q10570	Cleavage and polyadenylation specificity factor subunit 1 (Cleavage and polyadenylation specificity factor 160 kDa subunit) (CPSF 160 kDa subunit)	CPSF1	CPSF1 CPSF160	1443	5	5.54697	0.00516696	0.000332309	0.00483465	0.00530712	0.00374048	0.00669972	0.00448029	0.0191257	medium heterogeneity
Q9P2I0	Cleavage and polyadenylation specificity factor subunit 2 (Cleavage and polyadenylation specificity factor 100 kDa subunit) (CPSF 100 kDa subunit)	CPSF2	CPSF2 CPSF100 KIAA1367	782	2	5.64502	0.00518052	0.000788693	0.00439182	0.0069481	0.00177922	0.00456078	0.00247461	0.0191257	medium heterogeneity
Q9UKF6	Cleavage and polyadenylation specificity factor subunit 3 (EC 3.1.27.-) (Cleavage and polyadenylation specificity factor 73 kDa subunit) (CPSF 73 kDa subunit) (mRNA 3'-end-processing endonuclease CPSF-73)	CPSF3	CPSF3 CPSF73	684	2	5.34664	0.00216615	0.000572249	0.0015939	0.00211831	0.00139152	0.000627783	0.00120059	0.0928962	medium heterogeneity
O95639	Cleavage and polyadenylation specificity factor subunit 4 (Cleavage and polyadenylation specificity factor 30 kDa subunit) (CPSF 30 kDa subunit) (NS1 effector domain-binding protein 1) (Neb-1) (No arches homolog)	CPSF4	CPSF4 CPSF30 NAR NEB1	269	2	5.71946	0.00435886	0.00154306	0.0028158	0.00336918	0.00293892	0.000786336	0.00240078	0.0409836	medium heterogeneity
Q16630	Cleavage and polyadenylation specificity factor subunit 6 (Cleavage and polyadenylation specificity factor 68 kDa subunit) (CFIm68) (CPSF 68 kDa subunit) (Pre-mRNA cleavage factor Im 68 kDa subunit) (Protein HPBRII-4/7)	CPSF6	CPSF6 CFIM68	551	2	5.63414	0.0011626	0.000407408	0.000755195	0.000551181	0.000939402	0.000814612	0.000908204	0.193989	medium heterogeneity
Q8N684	Cleavage and polyadenylation specificity factor subunit 7 (Cleavage and polyadenylation specificity factor 59 kDa subunit) (CFIm59) (CPSF 59 kDa subunit) (Pre-mRNA cleavage factor Im 59 kDa subunit)	CPSF7	CPSF7	471	5	5.28777	0.0012637	0.00054336	0.000720344	0.000752189	0.000946542	-5.38e-05	0.00069646	0.196721	medium heterogeneity
P50416	Carnitine O-palmitoyltransferase 1, liver isoform (CPT1-L) (EC 2.3.1.21) (Carnitine O-palmitoyltransferase I, liver isoform) (CPT I) (CPTI-L) (Carnitine palmitoyltransferase 1A)	CPT1A	CPT1A CPT1	773	2	5.04114	0.00476728	0.00375802	0.00100926	0.00149976	0.000711729	0.000430328	0.000641379	0.155738	medium heterogeneity
P23786	Carnitine O-palmitoyltransferase 2, mitochondrial (EC 2.3.1.21) (Carnitine palmitoyltransferase II) (CPT II)	CPT2	CPT2 CPT1	658	7	5.01042	0.00354881	0.000938378	0.00261043	0.00251091	0.00156396	0.00604845	0.00268508	0.0519126	medium heterogeneity
Q9H3G5	Probable serine carboxypeptidase CPVL (EC 3.4.16.-) (Carboxypeptidase, vitellogenic-like) (Vitellogenic carboxypeptidase-like protein) (VCP-like protein) (hVLP)	CPVL	CPVL VLP PSEC0124 UNQ197/PRO223	476	4	5.50183	0.00393858	0.000386163	0.00355241	0.00213659	0.00534067	0.00243509	0.00461428	0.0355191	medium heterogeneity
P29762	Cellular retinoic acid-binding protein 1 (Cellular retinoic acid-binding protein I) (CRABP-I)	CRABP1	CRABP1 RBP5	137	2	5.74612	0.00298622	0.000429057	0.00255716	0.000945311	0.00241924	0.00780649	0.00376605	0.0546448	medium heterogeneity
P29373	Cellular retinoic acid-binding protein 2 (Cellular retinoic acid-binding protein II) (CRABP-II)	CRABP2	CRABP2	138	3	5.67138	0.0158166	0.00132267	0.0144939	0.0212569	0.0083863	0.0125276	0.00942163	0.00273224	variable in BPH
P43155	Carnitine O-acetyltransferase (Carnitine acetylase) (EC 2.3.1.7) (Carnitine acetyltransferase) (CAT) (CrAT)	CRAT	CRAT CAT1	626	3	5.3914	0.00300495	0.000247181	0.00275777	0.00524559	0.000685057	0.00151246	0.000891907	0.0409836	medium heterogeneity
P50238	Cysteine-rich protein 1 (CRP-1) (Cysteine-rich heart protein) (CRHP) (hCRHP) (Cysteine-rich intestinal protein) (CRIP)	CRIP1	CRIP1 CRIP CRP1	77	2	5.26028	0.0076005	0.00132016	0.00628034	0.00690288	0.00776028	-2.71e-05	0.00581343	0.00819672	variable in BPH and ADCA
P52943	Cysteine-rich protein 2 (CRP-2) (Protein ESP1)	CRIP2	CRIP2 CRP2	208	2	4.9249	0.00666227	0.00347358	0.00318869	0.00146118	0.00446635	0.00453824	0.00448432	0.0409836	medium heterogeneity
Q9H336	Cysteine-rich secretory protein LCCL domain-containing 1 (CocoaCrisp) (Cysteine-rich secretory protein 10) (CRISP-10) (LCCL domain-containing cysteine-rich secretory protein 1) (Trypsin inhibitor Hl)	CRISPLD1	CRISPLD1 CRISP10 LCRISP1 UNQ342/PRO541	500	2	4.63337	0.0296799	0.0108666	0.0188133	0.00674512	0.0163028	0.0625493	0.0278644	0.00273224	variable in ADCA
P46108	Adapter molecule crk (Proto-oncogene c-Crk) (p38)	CRK	CRK	304	4	5.55182	0.00713368	0.00215294	0.00498074	0.00311811	0.00835143	0.000456582	0.00637772	0.0191257	medium heterogeneity
P46109	Crk-like protein	CRKL	CRKL	303	3	5.19508	0.00195093	0.00132838	0.000622545	-0.000424385	0.00196221	-0.000255647	0.00140774	0.213115	medium heterogeneity
Q9BZJ0	Crooked neck-like protein 1 (Crooked neck homolog) (hCrn)	CRNKL1	CRNKL1 CRN CGI-201 MSTP021	848	2	5.91566	0.00162837	0.000533318	0.00109505	0.000919216	0.00105578	0.00174038	0.00122693	0.142077	medium heterogeneity
Q5TZA2	Rootletin (Ciliary rootlet coiled-coil protein)	CROCC	CROCC KIAA0445	2017	3	5.34843	0.00252002	0.00181725	0.000702779	0.00166107	9.37e-05	-0.000345006	-1.59e-05	0.202186	medium heterogeneity
Q9UKG9	Peroxisomal carnitine O-octanoyltransferase (COT) (EC 2.3.1.137)	CROT	CROT COT	612	3	4.82022	0.00687209	0.00622168	0.000650409	-0.000627895	0.00345687	-0.00393405	0.00160914	0.20765	medium heterogeneity
Q53ET0	CREB-regulated transcription coactivator 2 (Transducer of regulated cAMP response element-binding protein 2) (TORC-2) (Transducer of CREB protein 2)	CRTC2	CRTC2 TORC2	693	2	4.11769	0.00629136	0.0058306	0.000460761	-1.48e-05	-0.000855011	0.00583474	0.000817427	0.254098	medium heterogeneity
P02511	Alpha-crystallin B chain (Alpha(B)-crystallin) (Heat shock protein beta-5) (HspB5) (Renal carcinoma antigen NY-REN-27) (Rosenthal fiber component)	CRYAB	CRYAB CRYA2 HSPB5	175	6	5.63644	0.00445705	0.0012852	0.00317185	0.00312452	0.00161843	0.00797412	0.00320735	0.0409836	medium heterogeneity
Q9Y4K1	Beta/gamma crystallin domain-containing protein 1 (Absent in melanoma 1 protein)	CRYBG1	CRYBG1 AIM1	1723	3	5.66565	0.00733857	0.000507988	0.00683059	0.0107017	0.00303977	0.00658982	0.00392728	0.00819672	variable in BPH
Q9Y2S2	Lambda-crystallin homolog (EC 1.1.1.45) (L-gulonate 3-dehydrogenase) (Gul3DH)	CRYL1	CRYL1 CRY	319	5	5.17784	0.00234883	0.001145	0.00120384	0.000748655	0.000859489	0.00360241	0.00154522	0.131148	medium heterogeneity
Q14894	Ketimine reductase mu-crystallin (EC 1.5.1.25) (NADP-regulated thyroid-hormone-binding protein)	CRYM	CRYM THBP	314	4	5.31949	0.00293637	0.00110184	0.00183453	0.000992663	0.00218799	0.00329977	0.00246594	0.0819672	medium heterogeneity
Q08257	Quinone oxidoreductase (EC 1.6.5.5) (NADPH:quinone reductase) (Zeta-crystallin)	CRYZ	CRYZ	329	10	5.28333	0.0009989	0.000448831	0.000550069	0.000408759	0.000636974	0.000713285	0.000656052	0.226776	medium heterogeneity
O95825	Quinone oxidoreductase-like protein 1 (EC 1.-.-.-) (Protein 4P11) (Quinone oxidoreductase homolog 1) (QOH-1) (Zeta-crystallin homolog)	CRYZL1	CRYZL1 4P11	349	2	5.13682	0.00666262	0.00289641	0.0037662	0.0024541	0.0019322	0.0132045	0.00475029	0.0300546	medium heterogeneity
O75390	Citrate synthase, mitochondrial (EC 2.3.3.1) (Citrate (Si)-synthase)	CS	CS	466	11	5.14451	0.00116046	0.000654445	0.000506017	0.000624862	8.91e-05	0.0014001	0.000416884	0.23224	medium heterogeneity
O75534	Cold shock domain-containing protein E1 (N-ras upstream gene protein) (Protein UNR)	CSDE1	CSDE1 D1S155E KIAA0885 NRU UNR	798	5	5.73821	0.00342455	0.00134368	0.00208087	0.00283343	0.00226776	-0.000737505	0.00151644	0.068306	medium heterogeneity
P55060	Exportin-2 (Exp2) (Cellular apoptosis susceptibility protein) (Chromosome segregation 1-like protein) (Importin-alpha re-exporter)	CSE1L	CSE1L CAS XPO2	971	5	4.96083	0.00107245	0.000747015	0.000325431	0.00068658	-0.0001123	0.000555182	5.46e-05	0.327869	medium heterogeneity
P49674	Casein kinase I isoform epsilon (CKI-epsilon) (CKIe) (EC 2.7.11.1)	CSNK1E	CSNK1E	416	2	5.79742	0.0048399	0.00182317	0.00301673	0.00673179	0.000608097	-0.000902557	0.000230433	0.0409836	medium heterogeneity
P19784	Casein kinase II subunit alpha' (CK II alpha') (EC 2.7.11.1)	CSNK2A2	CSNK2A2 CK2A2	350	2	5.6312	0.00370047	0.000149888	0.00355059	0.00267489	0.00413192	0.00443369	0.00420736	0.0355191	medium heterogeneity
Q6UVK1	Chondroitin sulfate proteoglycan 4 (Chondroitin sulfate proteoglycan NG2) (Melanoma chondroitin sulfate proteoglycan) (Melanoma-associated chondroitin sulfate proteoglycan)	CSPG4	CSPG4 MCSP	2322	5	6.18477	0.00698678	0.000320371	0.00666641	0.00753551	0.00763471	0.00115416	0.00601458	0.00819672	variable in BPH and ADCA
P21291	Cysteine and glycine-rich protein 1 (Cysteine-rich protein 1) (CRP) (CRP1) (Epididymis luminal protein 141) (HEL-141)	CSRP1	CSRP1 CSRP CYRP	193	12	5.69254	0.0279761	0.000537779	0.0274383	0.0384666	0.0131255	0.0372917	0.019167	0.00273224	variable in BPH
Q16527	Cysteine and glycine-rich protein 2 (Cysteine-rich protein 2) (CRP2) (LIM domain only protein 5) (LMO-5) (Smooth muscle cell LIM protein) (SmLIM)	CSRP2	CSRP2 LMO5 SMLIM	193	4	4.96079	0.00408074	0.00247959	0.00160115	0.00215083	0.00186058	-0.000826175	0.00118889	0.0928962	medium heterogeneity
P01034	Cystatin-C (Cystatin-3) (Gamma-trace) (Neuroendocrine basic polypeptide) (Post-gamma-globulin)	CST3	CST3	146	4	5.55141	0.00403411	0.00175807	0.00227604	0.00318437	0.00103506	0.00327397	0.00159479	0.0601093	medium heterogeneity
P04080	Cystatin-B (CPI-B) (Liver thiol proteinase inhibitor) (Stefin-B)	CSTB	CSTB CST6 STFB	98	8	5.52674	0.0031662	0.00166744	0.00149875	0.00301797	0.000529478	-0.000151055	0.000359345	0.103825	medium heterogeneity
Q05048	Cleavage stimulation factor subunit 1 (CF-1 50 kDa subunit) (Cleavage stimulation factor 50 kDa subunit) (CSTF 50 kDa subunit) (CstF-50)	CSTF1	CSTF1	431	2	4.94137	0.00715048	0.00583649	0.00131399	0.00404654	-0.00108689	0.00031897	-0.000735427	0.125683	medium heterogeneity
Q12996	Cleavage stimulation factor subunit 3 (CF-1 77 kDa subunit) (Cleavage stimulation factor 77 kDa subunit) (CSTF 77 kDa subunit) (CstF-77)	CSTF3	CSTF3	717	3	4.47126	0.0065849	0.0041811	0.00240379	0.00506387	-0.000630332	0.00352593	0.000408734	0.057377	medium heterogeneity
Q13363	C-terminal-binding protein 1 (CtBP1) (EC 1.1.1.-)	CTBP1	CTBP1 CTBP	440	5	4.98063	0.00274792	0.000641908	0.00210601	0.00114409	0.00304708	0.00216858	0.00282746	0.068306	medium heterogeneity
Q01459	Di-N-acetylchitobiase (EC 3.2.1.-)	CTBS	CTBS CTB	385	2	6.22999	0.00905336	0.00439551	0.00465785	0.00624247	0.00201247	0.00784012	0.00346938	0.0191257	medium heterogeneity
P32929	Cystathionine gamma-lyase (EC 4.4.1.1) (Cysteine-protein sulfhydrase) (Gamma-cystathionase)	CTH	CTH	405	2	5.18804	0.00589549	0.00124857	0.00464692	0.00677902	0.00265786	0.00421785	0.00304785	0.0191257	medium heterogeneity
P35221	Catenin alpha-1 (Alpha E-catenin) (Cadherin-associated protein) (Renal carcinoma antigen NY-REN-13)	CTNNA1	CTNNA1	906	11	5.20908	0.00285941	0.000731269	0.00212814	0.000667593	0.000781802	0.0105488	0.00322355	0.0655738	medium heterogeneity
P26232	Catenin alpha-2 (Alpha N-catenin) (Alpha-catenin-related protein)	CTNNA2	CTNNA2 CAPR	953	3	5.13465	0.00450169	0.00242579	0.0020759	-0.000224016	0.0019912	0.00922973	0.00380084	0.068306	medium heterogeneity
P35222	Catenin beta-1 (Beta-catenin)	CTNNB1	CTNNB1 CTNNB OK/SW-cl.35 PRO2286	781	15	5.28725	0.00283844	0.000174113	0.00266433	0.00277541	0.00152818	0.00573952	0.00258101	0.0491803	medium heterogeneity
Q8WYA6	Beta-catenin-like protein 1 (Nuclear-associated protein) (NAP) (Testis development protein NYD-SP19)	CTNNBL1	CTNNBL1 C20orf33 PP8304	563	2	5.67751	0.000846218	0.000452595	0.000393622	0.000257113	0.000384099	0.000831724	0.000496005	0.286885	medium heterogeneity
O60716	Catenin delta-1 (Cadherin-associated Src substrate) (CAS) (p120 catenin) (p120(ctn)) (p120(cas))	CTNND1	CTNND1 KIAA0384	968	15	4.96493	0.00248898	0.00044109	0.00204789	0.00230984	0.000817699	0.00495258	0.00185142	0.068306	medium heterogeneity
Q6PD62	RNA polymerase-associated protein CTR9 homolog (SH2 domain-binding protein 1)	CTR9	CTR9 KIAA0155 SH2BP1	1173	2	5.27373	0.00369592	0.00247317	0.00122276	-0.000322252	0.00318187	-1.96e-05	0.00238152	0.128415	medium heterogeneity
P10619	Lysosomal protective protein (EC 3.4.16.5) (Carboxypeptidase C) (Carboxypeptidase L) (Cathepsin A) (Protective protein cathepsin A) (PPCA) (Protective protein for beta-galactosidase) [Cleaved into: Lysosomal protective protein 32 kDa chain; Lysosomal protective protein 20 kDa chain]	CTSA	CTSA PPGB	480	2	5.61522	0.00308673	0.00104439	0.00204234	0.00147637	0.0032046	0.000253486	0.00246682	0.068306	medium heterogeneity
P07858	Cathepsin B (EC 3.4.22.1) (APP secretase) (APPS) (Cathepsin B1) [Cleaved into: Cathepsin B light chain; Cathepsin B heavy chain]	CTSB	CTSB CPSB	339	4	5.0263	0.00429465	0.00134633	0.00294832	0.0026	0.0030576	0.00366543	0.00320956	0.0409836	medium heterogeneity
P07339	Cathepsin D (EC 3.4.23.5) [Cleaved into: Cathepsin D light chain; Cathepsin D heavy chain]	CTSD	CTSD CPSD	412	17	5.41352	0.00865191	0.000385032	0.00826688	0.00549972	0.0111254	0.00799291	0.0103422	0.00273224	variable in BPH and ADCA
P08311	Cathepsin G (CG) (EC 3.4.21.20)	CTSG	CTSG	255	4	5.69762	0.00218908	0.000919631	0.00126945	0.00264102	0.00015644	0.000493806	0.000240782	0.128415	medium heterogeneity
P09668	Pro-cathepsin H [Cleaved into: Cathepsin H mini chain; Cathepsin H (EC 3.4.22.16); Cathepsin H heavy chain; Cathepsin H light chain]	CTSH	CTSH CPSB	335	3	4.90717	0.0237954	0.00467029	0.0191251	0.0265378	0.012263	0.017473	0.0135655	0.00273224	variable in BPH and ADCA
Q9UBR2	Cathepsin Z (EC 3.4.18.1) (Cathepsin P) (Cathepsin X)	CTSZ	CTSZ	303	3	5.73271	0.00894502	0.00116579	0.00777923	0.0127615	0.00358839	0.0054049	0.00404251	0.00273224	variable in BPH
Q14247	Src substrate cortactin (Amplaxin) (Oncogene EMS1)	CTTN	CTTN EMS1	550	10	5.12909	0.00227462	0.000938816	0.0013358	0.00238175	0.000640761	0.000283099	0.000551346	0.117486	medium heterogeneity
Q9P2B4	CTTNBP2 N-terminal-like protein	CTTNBP2NL	CTTNBP2NL KIAA1433	639	3	5.92725	0.0269196	0.00103769	0.0258819	0.046819	0.00861105	0.0148833	0.0101791	0.00273224	variable in BPH
O60494	Cubilin (460 kDa receptor) (Intestinal intrinsic factor receptor) (Intrinsic factor-cobalamin receptor) (Intrinsic factor-vitamin B12 receptor)	CUBN	CUBN IFCR	3623	4	5.64158	0.00683411	0.000310983	0.00652313	0.0113302	0.00247053	0.00425983	0.00291786	0.00819672	variable in BPH
Q13616	Cullin-1 (CUL-1)	CUL1	CUL1	776	3	5.66294	0.0186906	0.00192967	0.0167609	0.0243026	0.00552537	0.0278426	0.0111047	0.00273224	variable in BPH
Q13617	Cullin-2 (CUL-2)	CUL2	CUL2	745	2	5.12085	0.0216762	0.0117717	0.00990457	0.0280598	-0.00244982	-0.00749803	-0.00371187	0.00273224	variable in BPH
Q13618	Cullin-3 (CUL-3)	CUL3	CUL3 KIAA0617	768	2	5.00093	0.00295599	0.000881705	0.00207429	0.002745	0.00214545	-0.000151362	0.00157125	0.068306	medium heterogeneity
Q13619	Cullin-4A (CUL-4A)	CUL4A	CUL4A	759	4	5.69674	0.0016087	0.000813373	0.000795327	0.00109181	0.000760703	9.75e-06	0.000572965	0.185792	medium heterogeneity
Q13620	Cullin-4B (CUL-4B)	CUL4B	CUL4B KIAA0695	913	5	5.14222	0.00604009	0.00381216	0.00222793	0.001871	0.00277285	0.001664	0.00249564	0.0601093	medium heterogeneity
Q93034	Cullin-5 (CUL-5) (Vasopressin-activated calcium-mobilizing receptor 1) (VACM-1)	CUL5	CUL5 VACM1	780	3	5.75591	0.00389878	0.000476207	0.00342258	0.00672558	0.00106358	0.000590554	0.000945324	0.0409836	medium heterogeneity
O60888	Protein CutA (Acetylcholinesterase-associated protein) (Brain acetylcholinesterase putative membrane anchor)	CUTA	CUTA ACHAP C6orf82	179	7	5.16406	0.00328622	0.00244462	0.000841601	0.000879808	0.0006528	0.00129338	0.000812946	0.18306	medium heterogeneity
Q69YN2	CWF19-like protein 1 (C19L1)	CWF19L1	CWF19L1	538	2	5.41412	0.0015894	0.00101808	0.000571325	-0.000136538	0.0010577	0.0012358	0.00110222	0.226776	medium heterogeneity
P00167	Cytochrome b5 (Microsomal cytochrome b5 type A) (MCB5)	CYB5A	CYB5A CYB5	134	8	5.48104	0.00733602	0.00124068	0.00609533	0.00339329	0.00369071	0.0214153	0.00812186	0.00819672	variable in ADCA
Q9UHQ9	NADH-cytochrome b5 reductase 1 (b5R.1) (EC 1.6.2.2) (Humb5R2) (NAD(P)H:quinone oxidoreductase type 3 polypeptide A2)	CYB5R1	CYB5R1 NQO3A2 UNQ3049/PRO9865	305	2	5.07555	0.00345103	0.00178176	0.00166927	0.00358978	0.000384276	-0.000237271	0.000228889	0.0901639	medium heterogeneity
P00387	NADH-cytochrome b5 reductase 3 (B5R) (Cytochrome b5 reductase) (EC 1.6.2.2) (Diaphorase-1) [Cleaved into: NADH-cytochrome b5 reductase 3 membrane-bound form; NADH-cytochrome b5 reductase 3 soluble form]	CYB5R3	CYB5R3 DIA1	301	6	5.24101	0.00421638	0.00121206	0.00300432	0.00334626	0.00321114	0.00135805	0.00274787	0.0409836	medium heterogeneity
P04839	Cytochrome b-245 heavy chain (EC 1.-.-.-) (CGD91-phox) (Cytochrome b(558) subunit beta) (Cytochrome b558 subunit beta) (Heme-binding membrane glycoprotein gp91phox) (NADPH oxidase 2) (Neutrophil cytochrome b 91 kDa polypeptide) (Superoxide-generating NADPH oxidase heavy chain subunit) (gp91-1) (gp91-phox) (p22 phagocyte B-cytochrome)	CYBB	CYBB NOX2	570	2	5.16433	0.0147073	0.00645505	0.00825223	0.011885	0.00538321	0.00596095	0.00552765	0.00273224	variable in BPH
P08574	Cytochrome c1, heme protein, mitochondrial (Complex III subunit 4) (Complex III subunit IV) (Cytochrome b-c1 complex subunit 4) (Ubiquinol-cytochrome-c reductase complex cytochrome c1 subunit) (Cytochrome c-1)	CYC1	CYC1	325	4	5.27997	0.00310765	0.00123407	0.00187358	0.00197622	0.0012879	0.00332269	0.0017966	0.0765027	medium heterogeneity
P99999	Cytochrome c	CYCS	CYCS CYC	105	3	5.33994	0.00448843	0.000537314	0.00395112	0.00328557	0.00284998	0.00925117	0.00445028	0.0300546	medium heterogeneity
Q7L576	Cytoplasmic FMR1-interacting protein 1 (Specifically Rac1-associated protein 1) (Sra-1) (p140sra-1)	CYFIP1	CYFIP1 KIAA0068	1253	5	5.23873	0.00197541	0.000797396	0.00117801	0.00063472	0.00160106	0.00153874	0.00158548	0.13388	medium heterogeneity
Q96F07	Cytoplasmic FMR1-interacting protein 2 (p53-inducible protein 121)	CYFIP2	CYFIP2 KIAA1168 PIR121	1278	3	5.52149	0.00326073	0.000513151	0.00274758	0.00203225	0.00203742	0.00702403	0.00328408	0.0409836	medium heterogeneity
Q16850	Lanosterol 14-alpha demethylase (LDM) (EC 1.14.13.70) (CYPLI) (Cytochrome P450 51A1) (Cytochrome P450-14DM) (Cytochrome P45014DM) (Cytochrome P450LI) (Sterol 14-alpha demethylase)	CYP51A1	CYP51A1 CYP51	503	2	5.3416	0.00305283	0.00270817	0.000344666	0.000159533	0.000848651	-0.000611889	0.000483516	0.311475	medium heterogeneity
O00622	Protein CYR61 (CCN family member 1) (Cysteine-rich angiogenic inducer 61) (Insulin-like growth factor-binding protein 10) (IBP-10) (IGF-binding protein 10) (IGFBP-10) (Protein GIG1)	CYR61	CYR61 CCN1 GIG1 IGFBP10	381	2	5.66695	0.00473698	0.00338091	0.00135608	-0.000140992	0.00374266	-0.00131245	0.00247888	0.114754	medium heterogeneity
Q9Y4D1	Disheveled-associated activator of morphogenesis 1	DAAM1	DAAM1 KIAA0666	1078	2	5.46025	0.00527867	0.00334112	0.00193755	0.00336318	0.00126516	-0.000322183	0.000868322	0.0737705	medium heterogeneity
Q5VWQ8	Disabled homolog 2-interacting protein (DAB2 interaction protein) (DAB2-interacting protein) (ASK-interacting protein 1) (AIP-1) (DOC-2/DAB-2 interactive protein)	DAB2IP	DAB2IP AF9Q34 AIP1 KIAA1743	1189	2	5.5265	0.014491	0.00436291	0.0101281	0.0091211	0.0130613	0.00434961	0.0108834	0.00273224	variable in BPH and ADCA
P61803	Dolichyl-diphosphooligosaccharide--protein glycosyltransferase subunit DAD1 (Oligosaccharyl transferase subunit DAD1) (Defender against cell death 1) (DAD-1)	DAD1	DAD1	113	2	5.10852	0.00655879	0.00558549	0.000973308	0.00520759	-0.00301886	0.000246962	-0.00220241	0.166667	medium heterogeneity
Q14118	Dystroglycan (Dystrophin-associated glycoprotein 1) [Cleaved into: Alpha-dystroglycan (Alpha-DG); Beta-dystroglycan (Beta-DG)]	DAG1	DAG1	895	2	5.3191	0.0125703	0.00101524	0.0115551	0.0068954	0.0172186	0.00854363	0.0150498	0.00273224	variable in ADCA
P51398	28S ribosomal protein S29, mitochondrial (MRP-S29) (S29mt) (Death-associated protein 3) (DAP-3) (Ionizing radiation resistance conferring protein) (Mitochondrial small ribosomal subunit protein mS29)	DAP3	DAP3 MRPS29	398	2	5.19962	0.0233914	0.00135513	0.0220363	0.031971	0.00846595	0.032943	0.0145852	0.00273224	variable in BPH
P14868	Aspartate--tRNA ligase, cytoplasmic (EC 6.1.1.12) (Aspartyl-tRNA synthetase) (AspRS) (Cell proliferation-inducing gene 40 protein)	DARS	DARS PIG40	501	9	5.09309	0.00409499	0.000540851	0.00355414	0.00561757	0.00126452	0.0042327	0.00200657	0.0355191	medium heterogeneity
Q6PI48	Aspartate--tRNA ligase, mitochondrial (EC 6.1.1.12) (Aspartyl-tRNA synthetase) (AspRS)	DARS2	DARS2	645	3	5.30458	0.00720013	0.000772973	0.00642716	0.00497606	0.00872635	0.00388289	0.00751548	0.00819672	variable in BPH and ADCA
Q96EP5	DAZ-associated protein 1 (Deleted in azoospermia-associated protein 1)	DAZAP1	DAZAP1	407	3	5.18719	0.0229447	0.018522	0.00442266	0.00220638	0.00154995	0.0196896	0.00608487	0.0191257	medium heterogeneity
P07108	Acyl-CoA-binding protein (ACBP) (Diazepam-binding inhibitor) (DBI) (Endozepine) (EP)	DBI	DBI	87	12	5.56697	0.00504332	0.000390527	0.00465279	0.00216743	0.0052083	0.0104423	0.00651681	0.0191257	medium heterogeneity
Q9UJU6	Drebrin-like protein (Cervical SH3P7) (Cervical mucin-associated protein) (Drebrin-F) (HPK1-interacting protein of 55 kDa) (HIP-55) (SH3 domain-containing protein 7)	DBNL	DBNL CMAP SH3P7 PP5423	430	6	5.26071	0.00110946	0.000231294	0.000878168	0.000811218	0.00117934	0.000175519	0.000928381	0.177596	medium heterogeneity
P11182	Lipoamide acyltransferase component of branched-chain alpha-keto acid dehydrogenase complex, mitochondrial (EC 2.3.1.168) (52 kDa mitochondrial autoantigen of primary biliary cirrhosis) (Branched chain 2-oxo-acid dehydrogenase complex component E2) (BCOADC-E2) (Branched-chain alpha-keto acid dehydrogenase complex component E2) (BCKAD-E2) (BCKADE2) (Dihydrolipoamide acetyltransferase component of …	DBT	DBT BCATE2	482	10	5.15627	0.00253077	0.00142474	0.00110603	0.000733242	0.000840423	0.00302124	0.00138563	0.142077	medium heterogeneity
Q9Y4B6	DDB1- and CUL4-associated factor 1 (HIV-1 Vpr-binding protein) (VprBP) (Serine/threonine-protein kinase VPRBP) (EC 2.7.11.1) (Vpr-interacting protein)	DCAF1	DCAF1 KIAA0800 RIP VPRBP	1507	2	5.59045	0.0108321	0.00316622	0.00766587	0.01647	0.000882137	0.00160464	0.00106276	0.00273224	variable in BPH
P61962	DDB1- and CUL4-associated factor 7 (WD repeat-containing protein 68) (WD repeat-containing protein An11 homolog)	DCAF7	DCAF7 HAN11 WDR68	342	2	5.69064	0.00212149	0.000732386	0.00138911	0.00135013	0.00187891	3.66e-05	0.00141834	0.114754	medium heterogeneity
O15075	Serine/threonine-protein kinase DCLK1 (EC 2.7.11.1) (Doublecortin domain-containing protein 3A) (Doublecortin-like and CAM kinase-like 1) (Doublecortin-like kinase 1)	DCLK1	DCLK1 DCAMKL1 DCDC3A KIAA0369	740	2	5.52316	0.00256178	0.00185912	0.000702661	0.0020185	-0.000664935	0.000857932	-0.000284218	0.202186	medium heterogeneity
P07585	Decorin (Bone proteoglycan II) (PG-S2) (PG40)	DCN	DCN SLRR1B	359	8	5.57515	0.00831359	0.000206693	0.0081069	0.00731597	0.00896839	0.0078952	0.00870009	0.00273224	variable in BPH and ADCA
Q96C86	m7GpppX diphosphatase (EC 3.6.1.59) (DCS-1) (Decapping scavenger enzyme) (Hint-related 7meGMP-directed hydrolase) (Histidine triad nucleotide-binding protein 5) (Histidine triad protein member 5) (HINT-5) (Scavenger mRNA-decapping enzyme DcpS)	DCPS	DCPS DCS1 HINT5 HSPC015	337	3	5.25076	0.00195649	0.00189587	6.06e-05	-8.9e-05	4.23e-05	0.000564627	0.000172848	0.461749	stable in BPH and ADCA
Q14203	Dynactin subunit 1 (150 kDa dynein-associated polypeptide) (DAP-150) (DP-150) (p135) (p150-glued)	DCTN1	DCTN1	1278	5	5.85494	0.00108785	0.000293434	0.000794421	0.000626023	0.000619903	0.00182317	0.000920719	0.185792	medium heterogeneity
Q13561	Dynactin subunit 2 (50 kDa dynein-associated polypeptide) (Dynactin complex 50 kDa subunit) (DCTN-50) (p50 dynamitin)	DCTN2	DCTN2 DCTN50	401	7	5.04397	0.00190788	0.000809328	0.00109855	0.00106122	0.00142227	0.000239344	0.00112654	0.142077	medium heterogeneity
Q9UJW0	Dynactin subunit 4 (Dyn4) (Dynactin subunit p62)	DCTN4	DCTN4	460	2	4.53899	0.0163545	0.0114767	0.0048778	0.00800289	-0.0010609	0.0133186	0.00253398	0.0191257	medium heterogeneity
Q9H773	dCTP pyrophosphatase 1 (EC 3.6.1.12) (Deoxycytidine-triphosphatase 1) (dCTPase 1) (RS21C6) (XTP3-transactivated gene A protein)	DCTPP1	DCTPP1 XTP3TPA CDA03	170	2	5.70058	0.0017568	0.00153666	0.000220134	0.000379242	-0.000447241	0.00174493	0.000100802	0.374317	stable in BPH and ADCA
Q96GG9	DCN1-like protein 1 (DCUN1 domain-containing protein 1) (Defective in cullin neddylation protein 1-like protein 1) (Squamous cell carcinoma-related oncogene)	DCUN1D1	DCUN1D1 DCUN1L1 RP42 SCCRO	259	2	5.47817	0.0110584	0.00352977	0.00752861	0.00721521	0.00674289	0.0108259	0.00776366	0.00273224	variable in BPH and ADCA
Q7Z4W1	L-xylulose reductase (XR) (EC 1.1.1.10) (Carbonyl reductase II) (Dicarbonyl/L-xylulose reductase) (Kidney dicarbonyl reductase) (kiDCR) (Short chain dehydrogenase/reductase family 20C member 1) (Sperm surface protein P34H)	DCXR	DCXR SDR20C1	244	5	5.17259	0.00538583	0.00073312	0.00465271	0.00140405	0.00608781	0.0100933	0.00708919	0.0191257	medium heterogeneity
O94760	N(G),N(G)-dimethylarginine dimethylaminohydrolase 1 (DDAH-1) (Dimethylarginine dimethylaminohydrolase 1) (EC 3.5.3.18) (DDAHI) (Dimethylargininase-1)	DDAH1	DDAH1 DDAH	285	5	5.3492	0.00589948	0.00116319	0.00473629	0.00598372	0.00244585	0.00786531	0.00380072	0.0191257	medium heterogeneity
O95865	N(G),N(G)-dimethylarginine dimethylaminohydrolase 2 (DDAH-2) (Dimethylarginine dimethylaminohydrolase 2) (EC 3.5.3.18) (DDAHII) (Dimethylargininase-2) (Protein G6a) (S-phase protein)	DDAH2	DDAH2 DDAH G6A NG30	285	8	5.29594	0.000750911	0.000428454	0.000322456	0.000109468	0.000583652	0.000177834	0.000482197	0.327869	medium heterogeneity
Q16531	DNA damage-binding protein 1 (DDB p127 subunit) (DNA damage-binding protein a) (DDBa) (Damage-specific DNA-binding protein 1) (HBV X-associated protein 1) (XAP-1) (UV-damaged DNA-binding factor) (UV-damaged DNA-binding protein 1) (UV-DDB 1) (XPE-binding factor) (XPE-BF) (Xeroderma pigmentosum group E-complementing protein) (XPCe)	DDB1	DDB1 XAP1	1140	7	5.08279	0.00262359	0.000796658	0.00182693	0.00241031	0.00098693	0.00259677	0.00138939	0.0819672	medium heterogeneity
P20711	Aromatic-L-amino-acid decarboxylase (AADC) (EC 4.1.1.28) (DOPA decarboxylase) (DDC)	DDC	DDC AADC	480	2	5.99818	0.0114199	0.00475683	0.00666308	0.00257374	0.0132599	-0.000859496	0.00973008	0.00819672	variable in ADCA
Q5TDH0	Protein DDI1 homolog 2 (EC 3.4.23.-)	DDI2	DDI2	399	4	5.11192	0.00322957	0.000891343	0.00233823	0.00222671	0.00214779	0.00324407	0.00242186	0.057377	medium heterogeneity
P39656	Dolichyl-diphosphooligosaccharide--protein glycosyltransferase 48 kDa subunit (DDOST 48 kDa subunit) (Oligosaccharyl transferase 48 kDa subunit)	DDOST	DDOST KIAA0115 OST48 OK/SW-cl.45	456	6	5.20356	0.00504325	0.000588095	0.00445516	0.00552211	0.00165223	0.0096631	0.00365495	0.0191257	medium heterogeneity
Q96HY6	DDRGK domain-containing protein 1 (Dashurin) (UFM1-binding and PCI domain-containing protein 1)	DDRGK1	DDRGK1 C20orf116 UFBP1	314	2	5.48209	0.00414404	0.000430667	0.00371337	0.000360883	0.00832529	-6.49e-05	0.00622774	0.0300546	medium heterogeneity
Q92499	ATP-dependent RNA helicase DDX1 (EC 3.6.4.13) (DEAD box protein 1) (DEAD box protein retinoblastoma) (DBP-RB)	DDX1	DDX1	740	8	5.39096	0.00447967	0.000746548	0.00373312	0.0054468	0.00120254	0.0061838	0.00244786	0.0300546	medium heterogeneity
Q13206	Probable ATP-dependent RNA helicase DDX10 (EC 3.6.4.13) (DEAD box protein 10)	DDX10	DDX10	875	2	5.5755	0.00444092	0.0032464	0.00119452	0.000471626	0.00309467	-0.00233724	0.00173669	0.131148	medium heterogeneity
Q92841	Probable ATP-dependent RNA helicase DDX17 (EC 3.6.4.13) (DEAD box protein 17) (DEAD box protein p72) (DEAD box protein p82) (RNA-dependent helicase p72)	DDX17	DDX17	729	12	5.26554	0.00235017	0.000609612	0.00174056	0.00261779	0.000165781	0.00383322	0.00108264	0.0874317	medium heterogeneity
Q9NR30	Nucleolar RNA helicase 2 (EC 3.6.4.13) (DEAD box protein 21) (Gu-alpha) (Nucleolar RNA helicase Gu) (Nucleolar RNA helicase II) (RH II/Gu)	DDX21	DDX21	783	5	5.95374	0.00676682	0.000483207	0.00628362	0.0108012	0.00128117	0.00773835	0.00289547	0.00819672	variable in BPH
Q9BUQ8	Probable ATP-dependent RNA helicase DDX23 (EC 3.6.4.13) (100 kDa U5 snRNP-specific protein) (DEAD box protein 23) (PRP28 homolog) (U5-100kD)	DDX23	DDX23	820	3	5.14361	0.00266791	0.000923806	0.00174411	0.00154242	0.00217365	0.00106055	0.00189537	0.0874317	medium heterogeneity
Q9GZR7	ATP-dependent RNA helicase DDX24 (EC 3.6.4.13) (DEAD box protein 24)	DDX24	DDX24	859	2	4.72367	0.00813372	0.00472301	0.00341071	0.000798005	0.0031585	0.0120054	0.00537023	0.0409836	medium heterogeneity
Q96GQ7	Probable ATP-dependent RNA helicase DDX27 (EC 3.6.4.13) (DEAD box protein 27)	DDX27	DDX27 cPERP-F RHLP HSPC259 PP3241	796	2	5.19164	0.00244395	0.000788143	0.00165581	0.00223585	0.00111216	0.00154664	0.00122078	0.0901639	medium heterogeneity
Q13838	Spliceosome RNA helicase DDX39B (EC 3.6.4.13) (56 kDa U2AF65-associated protein) (ATP-dependent RNA helicase p47) (DEAD box protein UAP56) (HLA-B-associated transcript 1 protein)	DDX39B	DDX39B BAT1 UAP56	428	6	5.10165	0.00255758	0.0022503	0.000307281	0.000994133	-0.000639805	0.00108798	-0.000207859	0.330601	medium heterogeneity
O00571	ATP-dependent RNA helicase DDX3X (EC 3.6.4.13) (DEAD box protein 3, X-chromosomal) (DEAD box, X isoform) (Helicase-like protein 2) (HLP2)	DDX3X	DDX3X DBX DDX3	662	4	5.07079	0.00289209	0.00120471	0.00168738	0.00243814	0.000374991	0.00337223	0.0011243	0.0901639	medium heterogeneity
O15523	ATP-dependent RNA helicase DDX3Y (EC 3.6.4.13) (DEAD box protein 3, Y-chromosomal)	DDX3Y	DDX3Y DBY	660	2	5.65242	0.0163875	0.00258271	0.0138048	-5.01e-05	0.0323128	-0.000154795	0.0241959	0.00273224	variable in ADCA
Q86XP3	ATP-dependent RNA helicase DDX42 (EC 3.6.4.13) (DEAD box protein 42) (RNA helicase-like protein) (RHELP) (RNA helicase-related protein) (RNAHP) (SF3b DEAD box protein) (Splicing factor 3B-associated 125 kDa protein) (SF3b125)	DDX42	DDX42	938	5	5.57947	0.0012036	0.00082813	0.000375467	4.39e-05	0.000958848	-0.000379932	0.000624153	0.295082	medium heterogeneity
Q7L014	Probable ATP-dependent RNA helicase DDX46 (EC 3.6.4.13) (DEAD box protein 46) (PRP5 homolog)	DDX46	DDX46 KIAA0801	1031	6	5.90763	0.00763058	0.000426927	0.00720366	0.00828103	0.00542809	0.00929822	0.00639563	0.00273224	variable in BPH and ADCA
P17844	Probable ATP-dependent RNA helicase DDX5 (EC 3.6.4.13) (DEAD box protein 5) (RNA helicase p68)	DDX5	DDX5 G17P1 HELR HLR1	614	6	5.39513	0.00193155	0.000609404	0.00132215	0.00113563	0.000327878	0.00486451	0.00146204	0.125683	medium heterogeneity
Q9BQ39	ATP-dependent RNA helicase DDX50 (EC 3.6.4.13) (DEAD box protein 50) (Gu-beta) (Nucleolar protein Gu2)	DDX50	DDX50	737	2	5.40125	0.0068819	0.00293308	0.00394882	0.00218026	0.00318641	0.0115417	0.00527524	0.0300546	medium heterogeneity
Q8TDD1	ATP-dependent RNA helicase DDX54 (EC 3.6.4.13) (ATP-dependent RNA helicase DP97) (DEAD box RNA helicase 97 kDa) (DEAD box protein 54)	DDX54	DDX54	881	2	5.47838	0.00325855	0.00045173	0.00280681	0.00302424	0.00238981	0.00340558	0.00264375	0.0409836	medium heterogeneity
O95786	Probable ATP-dependent RNA helicase DDX58 (EC 3.6.4.13) (DEAD box protein 58) (RIG-I-like receptor 1) (RLR-1) (Retinoic acid-inducible gene 1 protein) (RIG-1) (Retinoic acid-inducible gene I protein) (RIG-I)	DDX58	DDX58	925	2	5.34083	0.00144759	0.00062818	0.000819413	0.00100768	0.000491907	0.00123712	0.000678209	0.18306	medium heterogeneity
Q5T1V6	Probable ATP-dependent RNA helicase DDX59 (EC 3.6.4.13) (DEAD box protein 59) (Zinc finger HIT domain-containing protein 5)	DDX59	DDX59 ZNHIT5	619	2	5.03962	0.0102866	0.00721046	0.0030761	-0.00151443	0.00535275	0.0100177	0.00651899	0.0409836	medium heterogeneity
P26196	Probable ATP-dependent RNA helicase DDX6 (EC 3.6.4.13) (ATP-dependent RNA helicase p54) (DEAD box protein 6) (Oncogene RCK)	DDX6	DDX6 HLR2 RCK	483	8	5.14582	0.00130786	0.000884337	0.000423519	0.000853526	0.000147938	-3.98e-05	0.000101013	0.275956	medium heterogeneity
Q8IY21	Probable ATP-dependent RNA helicase DDX60 (EC 3.6.4.13) (DEAD box protein 60)	DDX60	DDX60	1712	3	5.91706	0.00344364	0.00084343	0.00260021	0.0053999	0.000885363	-0.000654332	0.000500439	0.0519126	medium heterogeneity
Q5H9U9	Probable ATP-dependent RNA helicase DDX60-like (EC 3.6.4.13) (DEAD box protein 60-like)	DDX60L	DDX60L	1706	2	5.93816	0.0121466	0.00206638	0.0100802	0.00510559	0.0181563	0.00077612	0.0138112	0.00273224	variable in ADCA
Q16698	2,4-dienoyl-CoA reductase, mitochondrial (EC 1.3.1.34) (2,4-dienoyl-CoA reductase [NADPH]) (4-enoyl-CoA reductase [NADPH]) (Short chain dehydrogenase/reductase family 18C member 1)	DECR1	DECR1 DECR SDR18C1	335	13	5.34023	0.0020083	0.000257732	0.00175057	0.00135385	0.00196285	0.00230389	0.00204811	0.0874317	medium heterogeneity
Q9NUI1	Peroxisomal 2,4-dienoyl-CoA reductase (pDCR) (EC 1.3.1.34) (2,4-dienoyl-CoA reductase 2) (Short chain dehydrogenase/reductase family 17C member 1)	DECR2	DECR2 PDCR SDR17C1	292	2	5.23855	0.00335643	0.000492364	0.00286407	0.00643777	-2.99e-05	0.000824985	0.000183791	0.0409836	medium heterogeneity
P35659	Protein DEK	DEK	DEK	375	4	5.57258	0.00191161	0.00155728	0.000354333	0.000359446	0.000456522	3.24e-05	0.000350498	0.306011	medium heterogeneity
A2RUS2	DENN domain-containing protein 3	DENND3	DENND3 KIAA0870	1198	2	5.6466	0.00879583	0.00202905	0.00676678	0.0098549	0.0048881	0.00313844	0.00445068	0.00819672	variable in BPH
Q7Z401	C-myc promoter-binding protein (DENN domain-containing protein 4A)	DENND4A	DENND4A IRLB MYCPBP	1863	4	6.11039	0.00169862	0.000291425	0.00140719	0.00229978	0.000500343	0.00144999	0.000737755	0.114754	medium heterogeneity
O75064	DENN domain-containing protein 4B	DENND4B	DENND4B KIAA0476	1496	2	5.46089	0.029884	0.00231231	0.0275717	0.0463976	0.0110428	0.0206802	0.0134522	0.00273224	variable in BPH
Q6ZUT9	DENN domain-containing protein 5B (Rab6IP1-like protein)	DENND5B	DENND5B	1274	2	5.42037	0.0198074	0.00485932	0.0149481	0.0147644	0.0197041	0.00123098	0.0150858	0.00273224	variable in BPH and ADCA
Q8WUY9	DEP domain-containing protein 1B (HBV X-transactivated gene 8 protein) (HBV XAg-transactivated protein 8)	DEPDC1B	DEPDC1B XTP8	529	2	5.32626	0.00506365	0.0018219	0.00324175	0.00304856	0.00274267	0.00531859	0.00338665	0.0409836	medium heterogeneity
O75140	GATOR complex protein DEPDC5 (DEP domain-containing protein 5)	DEPDC5	DEPDC5 KIAA0645	1603	2	4.5062	0.0126982	0.00773846	0.00495973	-0.000165248	0.00992278	0.00544555	0.00880347	0.0191257	medium heterogeneity
P17661	Desmin	DES	DES	470	38	6.08942	0.0513394	0.000243756	0.0510957	0.0667098	0.0236502	0.0865899	0.0393851	0	variable in BPH and ADCA
O00273	DNA fragmentation factor subunit alpha (DNA fragmentation factor 45 kDa subunit) (DFF-45) (Inhibitor of CAD) (ICAD)	DFFA	DFFA DFF1 DFF45 H13	331	3	4.55161	0.0107449	0.00450784	0.00623702	0.00573736	0.00977497	-0.00287788	0.00661176	0.00819672	variable in BPH and ADCA
P23743	Diacylglycerol kinase alpha (DAG kinase alpha) (EC 2.7.1.107) (80 kDa diacylglycerol kinase) (Diglyceride kinase alpha) (DGK-alpha)	DGKA	DGKA DAGK DAGK1	735	2	4.69728	0.00568392	0.00386707	0.00181685	0.00239113	0.00222948	-0.00114386	0.00138614	0.0846995	medium heterogeneity
P00374	Dihydrofolate reductase (EC 1.5.1.3)	DHFR	DHFR	187	3	5.46187	0.00148044	0.00124095	0.00023949	-3.05e-06	-0.000372112	0.0028019	0.000421392	0.36612	stable in BPH and ADCA
Q96LJ7	Dehydrogenase/reductase SDR family member 1 (EC 1.1.-.-) (Short chain dehydrogenase/reductase family 19C member 1)	DHRS1	DHRS1 SDR19C1	313	2	6.12652	0.00942546	0.00100664	0.00841881	0.0110092	0.00391853	0.0141486	0.00647605	0.00273224	variable in BPH and ADCA
Q13268	Dehydrogenase/reductase SDR family member 2, mitochondrial (EC 1.1.1.-) (Dicarbonyl reductase HEP27) (Protein D) (Short chain dehydrogenase/reductase family 25C member 1)	DHRS2	DHRS2 SDR25C1	280	4	4.79987	0.0055895	0.00360569	0.00198381	0.000934599	0.00203662	0.004973	0.00277072	0.0710383	medium heterogeneity
Q9Y394	Dehydrogenase/reductase SDR family member 7 (EC 1.1.-.-) (Retinal short-chain dehydrogenase/reductase 4) (retSDR4) (Short chain dehydrogenase/reductase family 34C member 1)	DHRS7	DHRS7 DHRS7A RETSDR4 SDR34C1 CGI-86 UNQ285/PRO3448	339	13	5.48208	0.00743786	0.00071264	0.00672522	0.00214093	0.00254638	0.0330146	0.0101634	0.00819672	variable in ADCA
Q9BPW9	Dehydrogenase/reductase SDR family member 9 (EC 1.1.-.-) (3-alpha hydroxysteroid dehydrogenase) (3-alpha-HSD) (NADP-dependent retinol dehydrogenase/reductase) (RDH-E2) (RDHL) (Retinol dehydrogenase 15) (Short chain dehydrogenase/reductase family 9C member 4) (Short-chain dehydrogenase/reductase retSDR8) (Tracheobronchial epithelial cell-specific retinol dehydrogenase) (RDH-TBE)	DHRS9	DHRS9 RDH15 SDR9C4 UNQ835/PRO1773	319	3	5.41404	0.00482656	0.00183265	0.00299391	0.00188641	0.00294248	0.0064707	0.00382453	0.0409836	medium heterogeneity
Q96HY7	Probable 2-oxoglutarate dehydrogenase E1 component DHKTD1, mitochondrial (EC 1.2.4.2) (Dehydrogenase E1 and transketolase domain-containing protein 1)	DHTKD1	DHTKD1 KIAA1630	919	3	5.25641	0.00318706	0.00274794	0.000439118	-0.000399715	0.00152551	-0.000303561	0.00106824	0.26776	medium heterogeneity
O43143	Pre-mRNA-splicing factor ATP-dependent RNA helicase DHX15 (EC 3.6.4.13) (ATP-dependent RNA helicase #46) (DEAH box protein 15)	DHX15	DHX15 DBP1 DDX15	795	13	5.49666	0.00225666	0.000625881	0.00163078	0.00177985	0.00117248	0.00255847	0.00151897	0.0901639	medium heterogeneity
O60231	Pre-mRNA-splicing factor ATP-dependent RNA helicase DHX16 (EC 3.6.4.13) (ATP-dependent RNA helicase #3) (DEAH-box protein 16)	DHX16	DHX16 DBP2 DDX16 KIAA0577 PRP2	1041	2	6.05384	0.000511061	0.000216968	0.000294093	0.000419604	0.000165906	0.000302121	0.000199959	0.336066	medium heterogeneity
Q7Z478	ATP-dependent RNA helicase DHX29 (EC 3.6.4.13) (DEAH box protein 29) (Nucleic acid helicase DDXx)	DHX29	DHX29 DDX29	1369	3	4.97273	0.0127164	0.00637984	0.00633659	0.00779821	0.00603473	0.00285733	0.00524038	0.00819672	variable in BPH and ADCA
Q7L2E3	Putative ATP-dependent RNA helicase DHX30 (EC 3.6.4.13) (DEAH box protein 30)	DHX30	DHX30 DDX30 KIAA0890	1194	3	5.49981	0.00177572	0.00064224	0.00113349	0.00256826	-0.000223579	0.000900349	5.74e-05	0.136612	medium heterogeneity
Q8IY37	Probable ATP-dependent RNA helicase DHX37 (EC 3.6.4.13) (DEAH box protein 37)	DHX37	DHX37 DDX37 KIAA1517	1157	2	4.99638	0.00850434	0.00477295	0.00373139	0.00459397	0.00109699	0.00904687	0.00308446	0.0300546	medium heterogeneity
Q8IX18	Probable ATP-dependent RNA helicase DHX40 (EC 3.6.4.13) (DEAH box protein 40) (Protein PAD)	DHX40	DHX40 DDX40 ARG147	779	2	5.78106	0.00538289	0.00298853	0.00239436	0.00491602	0.000476585	0.000582708	0.000503115	0.057377	medium heterogeneity
Q14562	ATP-dependent RNA helicase DHX8 (EC 3.6.4.13) (DEAH box protein 8) (RNA helicase HRH1)	DHX8	DHX8 DDX8	1220	3	5.86173	0.0133939	0.00307556	0.0103183	0.00735334	0.0123398	0.013149	0.0125421	0.00273224	variable in BPH and ADCA
Q08211	ATP-dependent RNA helicase A (EC 3.6.4.13) (DEAH box protein 9) (DExH-box helicase 9) (Leukophysin) (LKP) (Nuclear DNA helicase II) (NDH II) (RNA helicase A)	DHX9	DHX9 DDX9 LKP NDH2	1270	20	5.30366	0.00159486	0.00019713	0.00139773	0.0011294	0.00102615	0.00331749	0.00159898	0.114754	medium heterogeneity
Q9NR28	Diablo homolog, mitochondrial (Direct IAP-binding protein with low pI) (Second mitochondria-derived activator of caspase) (Smac)	DIABLO	DIABLO SMAC	239	3	5.59248	0.00143562	0.000445608	0.000990012	0.00105394	0.00122261	0.000100434	0.000942068	0.166667	medium heterogeneity
O60610	Protein diaphanous homolog 1 (Diaphanous-related formin-1) (DRF1)	DIAPH1	DIAPH1 DIAP1	1272	3	3.88147	0.00762302	0.00516572	0.0024573	0.0030406	0.00226204	0.00129314	0.00201982	0.057377	medium heterogeneity
O60879	Protein diaphanous homolog 2 (Diaphanous-related formin-2) (DRF2)	DIAPH2	DIAPH2 DIA	1101	2	5.55527	0.0133675	0.00131596	0.0120516	0.0214148	0.00573651	0.00290722	0.00502919	0.00273224	variable in BPH
Q9NSV4	Protein diaphanous homolog 3 (Diaphanous-related formin-3) (DRF3) (MDia2)	DIAPH3	DIAPH3 DIAP3	1193	2	5.58922	0.00278358	0.00170847	0.00107511	0.00077954	0.00160022	0.000386542	0.0012968	0.144809	medium heterogeneity
Q9BTC0	Death-inducer obliterator 1 (DIO-1) (hDido1) (Death-associated transcription factor 1) (DATF-1)	DIDO1	DIDO1 C20orf158 DATF1 KIAA0333	2240	2	5.18676	0.00972406	0.00191159	0.00781247	0.0105684	0.00584532	0.00544616	0.00574553	0.00273224	variable in BPH and ADCA
Q68CQ4	Digestive organ expansion factor homolog	DIEXF	DIEXF C1orf107 DEF	756	2	5.4029	0.0117914	0.00124432	0.010547	0.0142774	0.00686536	0.010401	0.00774927	0.00273224	variable in BPH and ADCA
Q9UNQ2	Probable dimethyladenosine transferase (EC 2.1.1.183) (DIM1 dimethyladenosine transferase 1 homolog) (DIM1 dimethyladenosine transferase 1-like) (Probable 18S rRNA (adenine(1779)-N(6)/adenine(1780)-N(6))-dimethyltransferase) (Probable 18S rRNA dimethylase) (Probable S-adenosylmethionine-6-N',N'-adenosyl(rRNA) dimethyltransferase)	DIMT1	DIMT1 DIMT1L HUSSY-05	313	2	5.69982	0.0174593	0.000780071	0.0166792	0.0306424	0.00284221	0.0163006	0.0062068	0.00273224	variable in BPH
Q9Y2L1	Exosome complex exonuclease RRP44 (EC 3.1.13.-) (EC 3.1.26.-) (Protein DIS3 homolog) (Ribosomal RNA-processing protein 44)	DIS3	DIS3 KIAA1008 RRP44	958	2	5.37311	0.00441093	0.00237686	0.00203407	0.00106362	0.00362857	0.000161935	0.00276191	0.068306	medium heterogeneity
O60832	H/ACA ribonucleoprotein complex subunit 4 (EC 5.4.99.-) (CBF5 homolog) (Dyskerin) (Nopp140-associated protein of 57 kDa) (Nucleolar protein NAP57) (Nucleolar protein family A member 4) (snoRNP protein DKC1)	DKC1	DKC1 NOLA4	514	3	5.05018	0.00324564	0.000732348	0.00251329	0.00203157	0.000530294	0.00990744	0.00287458	0.0546448	medium heterogeneity
P10515	Dihydrolipoyllysine-residue acetyltransferase component of pyruvate dehydrogenase complex, mitochondrial (EC 2.3.1.12) (70 kDa mitochondrial autoantigen of primary biliary cirrhosis) (PBC) (Dihydrolipoamide acetyltransferase component of pyruvate dehydrogenase complex) (M2 antigen complex 70 kDa subunit) (Pyruvate dehydrogenase complex component E2) (PDC-E2) (PDCE2)	DLAT	DLAT DLTA	647	7	4.96966	0.0025801	0.00124573	0.00133436	0.00109205	0.000490551	0.00459273	0.0015161	0.120219	medium heterogeneity
P09622	Dihydrolipoyl dehydrogenase, mitochondrial (EC 1.8.1.4) (Dihydrolipoamide dehydrogenase) (Glycine cleavage system L protein)	DLD	DLD GCSL LAD PHE3	509	5	5.38072	0.00266773	0.00185584	0.000811885	0.00186072	-0.000418157	0.00135549	2.53e-05	0.185792	medium heterogeneity
Q12959	Disks large homolog 1 (Synapse-associated protein 97) (SAP-97) (SAP97) (hDlg)	DLG1	DLG1	904	3	4.85529	0.00444832	0.00354327	0.00090505	0.0020373	0.000261764	-0.000561849	5.59e-05	0.172131	medium heterogeneity
Q8TDM6	Disks large homolog 5 (Discs large protein P-dlg) (Placenta and prostate DLG)	DLG5	DLG5 KIAA0583 PDLG	1919	2	5.62547	0.0127734	0.00690784	0.00586556	0.00373341	0.00606797	0.0116548	0.00746467	0.00819672	variable in BPH and ADCA
O95886	Disks large-associated protein 3 (DAP-3) (PSD-95/SAP90-binding protein 3) (SAP90/PSD-95-associated protein 3) (SAPAP3)	DLGAP3	DLGAP3 DAP3	979	2	5.07447	0.0182825	0.00141505	0.0168675	0.0233329	0.00642084	0.0288113	0.0120184	0.00273224	variable in BPH and ADCA
P36957	Dihydrolipoyllysine-residue succinyltransferase component of 2-oxoglutarate dehydrogenase complex, mitochondrial (EC 2.3.1.61) (2-oxoglutarate dehydrogenase complex component E2) (OGDC-E2) (Dihydrolipoamide succinyltransferase component of 2-oxoglutarate dehydrogenase complex) (E2K)	DLST	DLST DLTS	453	12	5.17474	0.000831685	0.000464181	0.000367504	0.000394368	0.000331839	0.000393904	0.000347355	0.295082	medium heterogeneity
P11532	Dystrophin	DMD	DMD	3685	2	5.79239	0.00975294	0.0012625	0.00849044	0.010349	0.00548027	0.0119452	0.00709652	0.00273224	variable in BPH and ADCA
Q9UI17	Dimethylglycine dehydrogenase, mitochondrial (EC 1.5.8.4) (ME2GLYDH)	DMGDH	DMGDH	866	3	5.91927	0.00358134	0.000708547	0.00287279	0.00379552	0.00294309	-0.000106297	0.00218074	0.0409836	medium heterogeneity
Q9Y485	DmX-like protein 1 (X-like 1 protein)	DMXL1	DMXL1 XL1	3027	4	5.62521	0.00500235	0.000706028	0.00429632	0.00644841	0.00163762	0.00581615	0.00268225	0.0218579	medium heterogeneity
Q8TDJ6	DmX-like protein 2 (Rabconnectin-3)	DMXL2	DMXL2 KIAA0856	3036	4	5.34978	0.00832237	0.00336026	0.00496211	0.00825484	-2.12e-05	0.0100338	0.00249256	0.0191257	medium heterogeneity
P31689	DnaJ homolog subfamily A member 1 (DnaJ protein homolog 2) (HSDJ) (Heat shock 40 kDa protein 4) (Heat shock protein J2) (HSJ-2) (Human DnaJ protein 2) (hDj-2)	DNAJA1	DNAJA1 DNAJ2 HDJ2 HSJ2 HSPF4	397	3	5.28088	0.00299971	0.000651626	0.00234808	0.00377801	0.00110108	0.00179929	0.00127564	0.057377	medium heterogeneity
O60884	DnaJ homolog subfamily A member 2 (Cell cycle progression restoration gene 3 protein) (Dnj3) (Dj3) (HIRA-interacting protein 4) (Renal carcinoma antigen NY-REN-14)	DNAJA2	DNAJA2 CPR3 HIRIP4	412	4	5.46513	0.00153518	0.00148851	4.67e-05	-0.000573992	0.000583947	0.000296786	0.000512157	0.464481	stable in BPH and ADCA
Q96EY1	DnaJ homolog subfamily A member 3, mitochondrial (DnaJ protein Tid-1) (hTid-1) (Hepatocellular carcinoma-associated antigen 57) (Tumorous imaginal discs protein Tid56 homolog)	DNAJA3	DNAJA3 HCA57 TID1	480	2	5.36539	0.00520216	0.00209349	0.00310867	0.00231738	0.00385797	0.00323462	0.00370213	0.0409836	medium heterogeneity
P25685	DnaJ homolog subfamily B member 1 (DnaJ protein homolog 1) (Heat shock 40 kDa protein 1) (HSP40) (Heat shock protein 40) (Human DnaJ protein 1) (hDj-1)	DNAJB1	DNAJB1 DNAJ1 HDJ1 HSPF1	340	6	5.11553	0.00317203	0.0011137	0.00205834	0.00147835	0.00320934	0.000345277	0.00249333	0.068306	medium heterogeneity
Q9UBS4	DnaJ homolog subfamily B member 11 (APOBEC1-binding protein 2) (ABBP-2) (DnaJ protein homolog 9) (ER-associated DNAJ) (ER-associated Hsp40 co-chaperone) (Endoplasmic reticulum DNA J domain-containing protein 3) (ER-resident protein ERdj3) (ERdj3) (ERj3p) (HEDJ) (Human DnaJ protein 9) (hDj-9) (PWP1-interacting protein 4)	DNAJB11	DNAJB11 EDJ ERJ3 HDJ9 PSEC0121 UNQ537/PRO1080	358	4	5.88459	0.00553836	0.00191076	0.0036276	0.00283969	0.00362533	0.00599812	0.00421853	0.0327869	medium heterogeneity
Q9UDY4	DnaJ homolog subfamily B member 4 (Heat shock 40 kDa protein 1 homolog) (HSP40 homolog) (Heat shock protein 40 homolog) (Human liver DnaJ-like protein)	DNAJB4	DNAJB4 DNAJW HLJ1	337	2	5.03878	0.00472405	0.00198097	0.00274308	0.00417471	0.00213335	0.000277395	0.00166936	0.0409836	medium heterogeneity
Q9UBS3	DnaJ homolog subfamily B member 9 (Endoplasmic reticulum DNA J domain-containing protein 4) (ER-resident protein ERdj4) (ERdj4) (Microvascular endothelial differentiation gene 1 protein) (Mdg-1)	DNAJB9	DNAJB9 MDG1 UNQ743/PRO1471	223	3	5.55577	0.0035502	0.00201874	0.00153146	0.00172624	0.000857224	0.00296984	0.00138538	0.101093	medium heterogeneity
Q8IXB1	DnaJ homolog subfamily C member 10 (EC 1.8.4.-) (Endoplasmic reticulum DNA J domain-containing protein 5) (ER-resident protein ERdj5) (ERdj5) (Macrothioredoxin) (MTHr)	DNAJC10	DNAJC10 ERDJ5 UNQ495/PRO1012	793	3	5.40484	0.00939531	0.00151468	0.00788063	0.0124268	0.00483864	0.00336798	0.00447098	0.00273224	variable in BPH
Q9NVH1	DnaJ homolog subfamily C member 11	DNAJC11	DNAJC11	559	2	5.51859	0.0116499	0.000543781	0.0111061	0.0129257	0.00907712	0.0117344	0.00974144	0.00273224	variable in BPH and ADCA
O75165	DnaJ homolog subfamily C member 13 (Required for receptor-mediated endocytosis 8) (RME-8)	DNAJC13	DNAJC13 KIAA0678 RME8	2243	5	5.58567	0.0268139	0.00235542	0.0244585	0.0365583	0.00727755	0.0397017	0.0153836	0.00273224	variable in BPH
Q9NVM6	DnaJ homolog subfamily C member 17	DNAJC17	DNAJC17	304	2	5.00413	0.00674157	0.00300474	0.00373683	0.0011129	0.00565461	0.00585528	0.00570478	0.0300546	medium heterogeneity
Q99543	DnaJ homolog subfamily C member 2 (M-phase phosphoprotein 11) (Zuotin-related factor 1) [Cleaved into: DnaJ homolog subfamily C member 2, N-terminally processed]	DNAJC2	DNAJC2 MPHOSPH11 MPP11 ZRF1	621	2	5.23177	0.00816482	0.00221592	0.00594889	0.0108724	0.00182838	0.00353996	0.00225627	0.00819672	variable in BPH
Q13217	DnaJ homolog subfamily C member 3 (Endoplasmic reticulum DNA J domain-containing protein 6) (ER-resident protein ERdj6) (ERdj6) (Interferon-induced, double-stranded RNA-activated protein kinase inhibitor) (Protein kinase inhibitor of 58 kDa) (Protein kinase inhibitor p58)	DNAJC3	DNAJC3 P58IPK PRKRI	504	4	5.59137	0.000939771	0.000619234	0.000320536	0.00031806	0.000289279	0.000421737	0.000322393	0.327869	medium heterogeneity
Q99615	DnaJ homolog subfamily C member 7 (Tetratricopeptide repeat protein 2) (TPR repeat protein 2)	DNAJC7	DNAJC7 TPR2 TTC2	494	4	5.36015	0.00476895	0.00206896	0.00269999	0.00280708	0.00153065	0.00588675	0.00261967	0.0437158	medium heterogeneity
O75937	DnaJ homolog subfamily C member 8 (Splicing protein spf31)	DNAJC8	DNAJC8 SPF31 HSPC315 HSPC331	253	3	5.5908	0.00128312	0.000589324	0.000693792	0.00100585	0.000424678	0.000564963	0.000459749	0.204918	medium heterogeneity
Q8WXX5	DnaJ homolog subfamily C member 9 (HDJC9) (DnaJ protein SB73)	DNAJC9	DNAJC9	260	4	6.05753	0.00446576	0.00321284	0.00125292	0.00142908	0.00170748	-0.000639257	0.0011208	0.128415	medium heterogeneity
Q05193	Dynamin-1 (EC 3.6.5.5)	DNM1	DNM1 DNM	864	2	5.14087	0.0150521	0.0108063	0.00424585	0.00251441	0.00415412	0.0097154	0.00554444	0.0245902	medium heterogeneity
O00429	Dynamin-1-like protein (EC 3.6.5.5) (Dnm1p/Vps1p-like protein) (DVLP) (Dynamin family member proline-rich carboxyl-terminal domain less) (Dymple) (Dynamin-like protein) (Dynamin-like protein 4) (Dynamin-like protein IV) (HdynIV) (Dynamin-related protein 1)	DNM1L	DNM1L DLP1 DRP1	736	5	5.09557	0.00257876	0.00199004	0.000588718	8.25e-05	0.00122411	0.000201109	0.000968359	0.224044	medium heterogeneity
P50570	Dynamin-2 (EC 3.6.5.5)	DNM2	DNM2 DYN2	870	5	4.94776	0.00344511	0.00109011	0.00235499	0.00242921	0.00298093	0.00025454	0.00229933	0.057377	medium heterogeneity
P26358	DNA (cytosine-5)-methyltransferase 1 (Dnmt1) (EC 2.1.1.37) (CXXC-type zinc finger protein 9) (DNA methyltransferase HsaI) (DNA MTase HsaI) (M.HsaI) (MCMT)	DNMT1	DNMT1 AIM CXXC9 DNMT	1616	2	5.74356	0.00237227	0.000377882	0.00199439	0.00342826	0.000330161	0.00268545	0.000918983	0.0710383	medium heterogeneity
Q9ULA0	Aspartyl aminopeptidase (EC 3.4.11.21)	DNPEP	DNPEP ASPEP DAP	475	5	4.83528	0.00397249	0.00340215	0.000570341	0.000849455	0.00067308	-0.000575222	0.000361005	0.226776	medium heterogeneity
O43598	2'-deoxynucleoside 5'-phosphate N-hydrolase 1 (EC 3.2.2.-) (c-Myc-responsive protein RCL)	DNPH1	DNPH1 C6orf108 RCL	174	3	5.30559	0.00550722	0.00298984	0.00251737	0.00405784	0.00198235	-0.000498935	0.00136203	0.0546448	medium heterogeneity
Q5QJE6	Deoxynucleotidyltransferase terminal-interacting protein 2 (Estrogen receptor-binding protein) (LPTS-interacting protein 2) (LPTS-RP2) (Terminal deoxynucleotidyltransferase-interacting factor 2) (TdIF2) (TdT-interacting factor 2)	DNTTIP2	DNTTIP2 ERBP TDIF2	756	2	5.86601	0.0175675	0.00387937	0.0136881	0.0113112	0.0182445	0.00714979	0.0154708	0.00273224	variable in BPH and ADCA
Q96BY6	Dedicator of cytokinesis protein 10 (Zizimin-3)	DOCK10	DOCK10 KIAA0694 ZIZ3	2186	2	5.04264	0.00399213	0.00133442	0.00265772	0.00276117	0.00166422	0.00532787	0.00258013	0.0491803	medium heterogeneity
Q5JSL3	Dedicator of cytokinesis protein 11 (Activated Cdc42-associated guanine nucleotide exchange factor) (ACG) (Zizimin-2)	DOCK11	DOCK11 ZIZ2	2073	6	5.17671	0.00821978	0.00272641	0.00549336	0.00287367	0.00843907	0.00451533	0.00745814	0.010929	medium heterogeneity
Q92608	Dedicator of cytokinesis protein 2	DOCK2	DOCK2 KIAA0209	1830	4	5.43791	0.00667957	0.000472251	0.00620732	0.00973342	0.00253445	0.00664763	0.00356275	0.00819672	variable in BPH
Q8NF50	Dedicator of cytokinesis protein 8	DOCK8	DOCK8	2099	2	5.43288	0.00412838	0.00164376	0.00248462	0.00322289	0.00211152	0.0013891	0.00193092	0.0546448	medium heterogeneity
Q9BZ29	Dedicator of cytokinesis protein 9 (Cdc42 guanine nucleotide exchange factor zizimin-1) (Zizimin-1)	DOCK9	DOCK9 KIAA1058 ZIZ1	2069	2	5.63156	0.00206389	0.000685187	0.00137871	0.00197174	0.00103116	0.000642242	0.00093393	0.114754	medium heterogeneity
Q99704	Docking protein 1 (Downstream of tyrosine kinase 1) (p62(dok)) (pp62)	DOK1	DOK1	481	2	5.48861	0.0020815	0.000693479	0.00138802	0.00103088	0.00185475	0.00105924	0.00165587	0.114754	medium heterogeneity
O60496	Docking protein 2 (Downstream of tyrosine kinase 2) (p56(dok-2))	DOK2	DOK2	412	2	4.8133	0.0446452	0.0262553	0.0183899	0.034391	0.0113535	-0.00850438	0.00638906	0.00273224	variable in BPH
Q9Y3R5	Protein dopey-2	DOPEY2	DOPEY2 C21orf5 KIAA0933	2298	8	4.99183	0.002338	0.000586913	0.00175109	0.00221824	0.000881905	0.00295717	0.00140072	0.0874317	medium heterogeneity
P16444	Dipeptidase 1 (EC 3.4.13.19) (Dehydropeptidase-I) (Microsomal dipeptidase) (Renal dipeptidase) (hRDP)	DPEP1	DPEP1 MDP RDP	411	2	4.90196	0.0384387	0.00496294	0.0334758	0.0361017	0.027116	0.0446773	0.0315063	0.00273224	variable in BPH and ADCA
Q9NY33	Dipeptidyl peptidase 3 (EC 3.4.14.4) (Dipeptidyl aminopeptidase III) (Dipeptidyl arylamidase III) (Dipeptidyl peptidase III) (DPP III) (Enkephalinase B)	DPP3	DPP3	737	7	5.05477	0.00203622	0.000520229	0.00151599	0.00147437	0.00131527	0.00224299	0.0015472	0.101093	medium heterogeneity
P27487	Dipeptidyl peptidase 4 (EC 3.4.14.5) (ADABP) (Adenosine deaminase complexing protein 2) (ADCP-2) (Dipeptidyl peptidase IV) (DPP IV) (T-cell activation antigen CD26) (TP103) (CD antigen CD26) [Cleaved into: Dipeptidyl peptidase 4 membrane form (Dipeptidyl peptidase IV membrane form); Dipeptidyl peptidase 4 soluble form (Dipeptidyl peptidase IV soluble form)]	DPP4	DPP4 ADCP2 CD26	766	19	5.45217	0.00573973	0.00047446	0.00526527	0.00290124	0.00185842	0.0225779	0.00703828	0.0136612	medium heterogeneity
Q9UHL4	Dipeptidyl peptidase 2 (EC 3.4.14.2) (Dipeptidyl aminopeptidase II) (Dipeptidyl peptidase 7) (Dipeptidyl peptidase II) (DPP II) (Quiescent cell proline dipeptidase)	DPP7	DPP7 DPP2 QPP	492	16	5.25223	0.00639797	0.00189792	0.00450005	0.00245022	0.00143748	0.0198373	0.00603743	0.0191257	medium heterogeneity
Q86TI2	Dipeptidyl peptidase 9 (DP9) (EC 3.4.14.5) (Dipeptidyl peptidase IV-related protein 2) (DPRP-2) (Dipeptidyl peptidase IX) (DPP IX) (Dipeptidyl peptidase-like protein 9) (DPLP9)	DPP9	DPP9 DPRP2	863	3	6.10165	0.00395149	0.000374484	0.003577	0.00647197	0.00105233	0.00246611	0.00140578	0.0355191	medium heterogeneity
Q07507	Dermatopontin (Tyrosine-rich acidic matrix protein) (TRAMP)	DPT	DPT	201	7	5.33912	0.00395042	0.00150793	0.00244249	0.00441658	-0.000182283	0.00439454	0.000961924	0.057377	medium heterogeneity
Q12882	Dihydropyrimidine dehydrogenase [NADP(+)] (DHPDHase) (DPD) (EC 1.3.1.2) (Dihydrothymine dehydrogenase) (Dihydrouracil dehydrogenase)	DPYD	DPYD	1025	2	5.87332	0.0123203	0.00989428	0.00242597	0.00203125	0.00311866	0.00153209	0.00272201	0.057377	medium heterogeneity
Q16555	Dihydropyrimidinase-related protein 2 (DRP-2) (Collapsin response mediator protein 2) (CRMP-2) (N2A3) (Unc-33-like phosphoprotein 2) (ULIP-2)	DPYSL2	DPYSL2 CRMP2 ULIP2	572	16	5.39011	0.00184788	0.000600852	0.00124703	0.00151425	0.000502076	0.00268024	0.00104662	0.128415	medium heterogeneity
Q14195	Dihydropyrimidinase-related protein 3 (DRP-3) (Collapsin response mediator protein 4) (CRMP-4) (Unc-33-like phosphoprotein 1) (ULIP-1)	DPYSL3	DPYSL3 CRMP4 DRP3 ULIP ULIP1	570	22	5.46885	0.00724666	0.000308921	0.00693774	0.0105035	0.00222073	0.0103916	0.00426345	0.00546448	variable in BPH
Q01658	Protein Dr1 (Down-regulator of transcription 1) (Negative cofactor 2-beta) (NC2-beta) (TATA-binding protein-associated phosphoprotein)	DR1	DR1	176	3	5.17755	0.000947457	0.000703929	0.000243527	0.000455101	1.31e-05	0.000300216	8.48e-05	0.360656	stable in BPH and ADCA
Q9Y295	Developmentally-regulated GTP-binding protein 1 (DRG-1) (Neural precursor cell expressed developmentally down-regulated protein 3) (NEDD-3)	DRG1	DRG1 NEDD3	367	2	5.1354	0.00405507	0.00255917	0.00149589	-0.000258134	0.003206	0.00162762	0.00281141	0.103825	medium heterogeneity
P55039	Developmentally-regulated GTP-binding protein 2 (DRG-2)	DRG2	DRG2	364	2	5.28735	0.003427	0.00143052	0.00199648	0.00186873	0.00249897	0.000872253	0.00209229	0.0710383	medium heterogeneity
Q02487	Desmocollin-2 (Cadherin family member 2) (Desmocollin-3) (Desmosomal glycoprotein II) (Desmosomal glycoprotein III)	DSC2	DSC2 CDHF2 DSC3	901	3	5.068	0.00218843	0.000651081	0.00153735	0.0029227	0.000355461	0.000926918	0.000498325	0.101093	medium heterogeneity
O14972	Down syndrome critical region protein 3 (Down syndrome critical region protein A)	DSCR3	DSCR3 DCRA DSCRA	297	2	5.65577	0.0123203	0.00123384	0.0110865	0.00954531	0.00835099	0.0239166	0.0122424	0.00273224	variable in BPH and ADCA
Q02413	Desmoglein-1 (Cadherin family member 4) (Desmosomal glycoprotein 1) (DG1) (DGI) (Pemphigus foliaceus antigen)	DSG1	DSG1 CDHF4	1049	2	5.65147	0.00304955	0.00278401	0.000265541	0.000767099	-0.000881245	0.00220122	-0.000110628	0.349727	stable in BPH and ADCA
Q14126	Desmoglein-2 (Cadherin family member 5) (HDGC)	DSG2	DSG2 CDHF5	1118	6	4.91373	0.00208761	0.000794228	0.00129338	0.0013174	0.000246074	0.00436322	0.00127536	0.128415	medium heterogeneity
Q9H410	Kinetochore-associated protein DSN1 homolog	DSN1	DSN1 C20orf172 MIS13	356	2	5.57563	0.00527745	0.000959807	0.00431765	0.00553178	0.00336401	0.00353615	0.00340704	0.0218579	medium heterogeneity
P15924	Desmoplakin (DP) (250/210 kDa paraneoplastic pemphigus antigen)	DSP	DSP	2871	13	5.13839	0.00183434	0.000696442	0.0011379	0.00131357	-0.000151099	0.00447786	0.00100614	0.136612	medium heterogeneity
Q03001	Dystonin (230 kDa bullous pemphigoid antigen) (230/240 kDa bullous pemphigoid antigen) (Bullous pemphigoid antigen 1) (BPA) (Bullous pemphigoid antigen) (Dystonia musculorum protein) (Hemidesmosomal plaque protein)	DST	DST BP230 BP240 BPAG1 DMH DT KIAA0728	7570	4	5.89792	0.00123162	0.000642938	0.000588685	0.000799517	0.000101314	0.0014183	0.00043056	0.224044	medium heterogeneity
P60981	Destrin (Actin-depolymerizing factor) (ADF)	DSTN	DSTN ACTDP DSN	165	7	5.40527	0.00940574	0.000603265	0.00880247	0.0155292	0.00201057	0.00899803	0.00375744	0.00273224	variable in BPH
Q8TEA8	D-aminoacyl-tRNA deacylase 1 (DTD) (EC 3.1.1.96) (DNA-unwinding element-binding protein B) (DUE-B) (Gly-tRNA(Ala) deacylase) (EC 3.1.1.-) (Histidyl-tRNA synthase-related)	DTD1	DTD1 C20orf88 DUEB HARS2	209	2	5.22223	0.01233	0.00354861	0.00878139	0.00969155	0.0101453	0.00195905	0.00809877	0.00273224	variable in BPH and ADCA
Q96G46	tRNA-dihydrouridine(47) synthase [NAD(P)(+)]-like (EC 1.3.1.-) (tRNA-dihydrouridine synthase 3-like)	DUS3L	DUS3L	650	2	4.95553	0.0162139	0.00347658	0.0127373	0.0159826	0.00837642	0.0160838	0.0103033	0.00273224	variable in BPH and ADCA
P51452	Dual specificity protein phosphatase 3 (EC 3.1.3.16) (EC 3.1.3.48) (Dual specificity protein phosphatase VHR) (Vaccinia H1-related phosphatase) (VHR)	DUSP3	DUSP3 VHR	185	4	5.36362	0.00224739	0.000775304	0.00147208	0.0023447	9.05e-05	0.00299888	0.000817624	0.103825	medium heterogeneity
P33316	Deoxyuridine 5'-triphosphate nucleotidohydrolase, mitochondrial (dUTPase) (EC 3.6.1.23) (dUTP pyrophosphatase)	DUT	DUT	252	3	5.0862	0.00450473	0.00292396	0.00158077	0.00166929	0.00129934	0.00215947	0.00151438	0.0956284	medium heterogeneity
O14641	Segment polarity protein dishevelled homolog DVL-2 (Dishevelled-2) (DSH homolog 2)	DVL2	DVL2	736	2	5.69584	0.0187946	0.000857472	0.0179372	0.0284762	0.0102477	0.00938857	0.0100329	0.00273224	variable in BPH
Q14204	Cytoplasmic dynein 1 heavy chain 1 (Cytoplasmic dynein heavy chain 1) (Dynein heavy chain, cytosolic)	DYNC1H1	DYNC1H1 DHC1 DNCH1 DNCL DNECL DYHC KIAA0325	4646	23	4.69909	0.0039509	0.00127619	0.00267471	0.00305036	0.00125008	0.00582167	0.00239298	0.0491803	medium heterogeneity
Q13409	Cytoplasmic dynein 1 intermediate chain 2 (Cytoplasmic dynein intermediate chain 2) (Dynein intermediate chain 2, cytosolic) (DH IC-2)	DYNC1I2	DYNC1I2 DNCI2 DNCIC2	638	6	4.96682	0.00197467	0.00144883	0.000525845	0.00115204	-1.98e-05	0.000284306	5.62e-05	0.229508	medium heterogeneity
O43237	Cytoplasmic dynein 1 light intermediate chain 2 (Dynein light intermediate chain 2, cytosolic) (LIC-2) (LIC53/55)	DYNC1LI2	DYNC1LI2 DNCLI2 LIC2	492	2	5.40563	0.0018343	0.000648802	0.0011855	0.00196189	0.000877092	-0.000218421	0.000603214	0.13388	medium heterogeneity
P63172	Dynein light chain Tctex-type 1 (Protein CW-1) (T-complex testis-specific protein 1 homolog)	DYNLT1	DYNLT1 TCTEL1 TCTEX-1 TCTEX1	113	2	4.65326	0.0123737	0.00794602	0.00442766	0.00654944	0.00618717	-0.0072162	0.00283633	0.0191257	medium heterogeneity
O75923	Dysferlin (Dystrophy-associated fer-1-like protein) (Fer-1-like protein 1)	DYSF	DYSF FER1L1	2080	2	5.26592	0.00292646	0.00161313	0.00131333	0.00171466	0.00142343	-0.00022096	0.00101233	0.125683	medium heterogeneity
P42892	Endothelin-converting enzyme 1 (ECE-1) (EC 3.4.24.71)	ECE1	ECE1	770	2	5.00121	0.012203	0.00800688	0.00419613	0.00949828	0.000908914	-0.0018487	0.000219512	0.0245902	medium heterogeneity
Q13011	Delta(3,5)-Delta(2,4)-dienoyl-CoA isomerase, mitochondrial (EC 5.3.3.-)	ECH1	ECH1	328	6	5.15325	0.00326633	0.0003948	0.00287154	0.00201258	0.00265682	0.00609252	0.00351575	0.0409836	medium heterogeneity
Q86YB7	Enoyl-CoA hydratase domain-containing protein 2, mitochondrial	ECHDC2	ECHDC2	292	3	5.30477	0.00133479	0.000226532	0.00110826	0.00166694	0.00082982	0.000267548	0.000689252	0.142077	medium heterogeneity
Q96DC8	Enoyl-CoA hydratase domain-containing protein 3, mitochondrial	ECHDC3	ECHDC3 PP1494 PP8332	303	2	4.80351	0.0162124	0.00994168	0.00627072	0.00310065	0.0036248	0.0237187	0.00864827	0.00819672	variable in ADCA
P30084	Enoyl-CoA hydratase, mitochondrial (EC 4.2.1.17) (Enoyl-CoA hydratase 1) (Short-chain enoyl-CoA hydratase) (SCEH)	ECHS1	ECHS1	290	12	5.50468	0.00352718	0.0003475	0.00317968	0.00354284	0.00204	0.00550925	0.00290731	0.0409836	medium heterogeneity
P42126	Enoyl-CoA delta isomerase 1, mitochondrial (EC 5.3.3.8) (3,2-trans-enoyl-CoA isomerase) (Delta(3),Delta(2)-enoyl-CoA isomerase) (D3,D2-enoyl-CoA isomerase) (Dodecenoyl-CoA isomerase)	ECI1	ECI1 DCI	302	2	5.24178	0.00572423	0.00390729	0.00181694	0.00118149	0.0033359	-0.000833567	0.00229354	0.0846995	medium heterogeneity
O75521	Enoyl-CoA delta isomerase 2, mitochondrial (EC 5.3.3.8) (DRS-1) (Delta(3),delta(2)-enoyl-CoA isomerase) (D3,D2-enoyl-CoA isomerase) (Diazepam-binding inhibitor-related protein 1) (DBI-related protein 1) (Dodecenoyl-CoA isomerase) (Hepatocellular carcinoma-associated antigen 88) (Peroxisomal 3,2-trans-enoyl-CoA isomerase) (pECI) (Renal carcinoma antigen NY-REN-1)	ECI2	ECI2 DRS1 HCA88 PECI	394	5	5.05233	0.00197647	0.000542369	0.0014341	0.00259896	-3.23e-05	0.00233866	0.000560457	0.112022	medium heterogeneity
Q16610	Extracellular matrix protein 1 (Secretory component p85)	ECM1	ECM1	540	2	5.88996	0.00222504	0.000941592	0.00128345	0.000950894	0.00214481	-0.000302939	0.00153287	0.128415	medium heterogeneity
Q5VYK3	Proteasome-associated protein ECM29 homolog (Ecm29)	ECM29	ECM29 KIAA0368	1845	6	5.20449	0.00255266	0.000753633	0.00179902	0.00068815	0.00220947	0.00390028	0.00263218	0.0846995	medium heterogeneity
Q9BQ95	Evolutionarily conserved signaling intermediate in Toll pathway, mitochondrial (Protein SITPEC)	ECSIT	ECSIT	431	2	5.35806	0.0111398	0.00206322	0.00907655	0.0134179	0.00291092	0.0145496	0.00582058	0.00273224	variable in BPH
Q96F86	Enhancer of mRNA-decapping protein 3 (LSM16 homolog) (YjeF N-terminal domain-containing protein 2) (YjeF_N2) (hYjeF_N2) (YjeF domain-containing protein 1)	EDC3	EDC3 LSM16 YJDC YJEFN2 PP844	508	2	5.66915	0.00145117	0.000762783	0.000688391	0.00142311	-2.22e-05	0.000616158	0.000137352	0.204918	medium heterogeneity
Q6P2E9	Enhancer of mRNA-decapping protein 4 (Autoantigen Ge-1) (Autoantigen RCD-8) (Human enhancer of decapping large subunit) (Hedls)	EDC4	EDC4 HEDLS	1401	3	4.87231	0.00499497	0.00333142	0.00166355	0.00317512	0.00094767	-0.000723503	0.000529877	0.0901639	medium heterogeneity
Q9BZQ6	ER degradation-enhancing alpha-mannosidase-like protein 3 (EC 3.2.1.113) (Alpha-1,2-mannosidase EDEM3)	EDEM3	EDEM3 C1orf22	932	4	5.60141	0.00534037	0.0026007	0.00273968	0.00248965	0.000901272	0.00900497	0.0029272	0.0409836	medium heterogeneity
O60869	Endothelial differentiation-related factor 1 (EDF-1) (Multiprotein-bridging factor 1) (MBF1)	EDF1	EDF1	148	2	4.8085	0.00443718	0.00325348	0.0011837	0.00216299	-0.000183724	0.0023481	0.000449233	0.13388	medium heterogeneity
Q15075	Early endosome antigen 1 (Endosome-associated protein p162) (Zinc finger FYVE domain-containing protein 2)	EEA1	EEA1 ZFYVE2	1411	8	5.56858	0.00282105	0.000307889	0.00251316	0.00314322	0.000849105	0.00561519	0.00204063	0.0546448	medium heterogeneity
Q05639	Elongation factor 1-alpha 2 (EF-1-alpha-2) (Eukaryotic elongation factor 1 A-2) (eEF1A-2) (Statin-S1)	EEF1A2	EEF1A2 EEF1AL STN	463	5	5.37673	0.00257227	0.000684605	0.00188767	0.00135609	0.00240085	0.00194287	0.00228635	0.0765027	medium heterogeneity
P24534	Elongation factor 1-beta (EF-1-beta)	EEF1B2	EEF1B2 EEF1B EF1B	225	5	5.30649	0.00155465	0.000781193	0.000773453	0.0016351	0.000291642	-0.000366041	0.000127222	0.188525	medium heterogeneity
P29692	Elongation factor 1-delta (EF-1-delta) (Antigen NY-CO-4)	EEF1D	EEF1D EF1D	281	8	5.35118	0.00287748	0.000715052	0.00216243	0.00246045	0.00247217	0.000339124	0.00193891	0.0655738	medium heterogeneity
O43324	Eukaryotic translation elongation factor 1 epsilon-1 (Aminoacyl tRNA synthetase complex-interacting multifunctional protein 3) (Elongation factor p18) (Multisynthase complex auxiliary component p18)	EEF1E1	EEF1E1 AIMP3 P18	174	2	5.24005	0.00161734	0.00123262	0.000384715	0.0012731	-0.000127677	-0.000743276	-0.000281577	0.295082	medium heterogeneity
P26641	Elongation factor 1-gamma (EF-1-gamma) (eEF-1B gamma)	EEF1G	EEF1G EF1G PRO1608	437	10	5.43356	0.00374231	0.000952917	0.00278939	0.00330589	0.00216979	0.00309865	0.00240201	0.0409836	medium heterogeneity
P13639	Elongation factor 2 (EF-2)	EEF2	EEF2 EF2	858	21	5.60241	0.00596201	0.000298448	0.00566356	0.00609553	0.00298147	0.0124139	0.00533958	0.010929	medium heterogeneity
O00418	Eukaryotic elongation factor 2 kinase (eEF-2 kinase) (eEF-2K) (EC 2.7.11.20) (Calcium/calmodulin-dependent eukaryotic elongation factor 2 kinase)	EEF2K	EEF2K	725	2	5.34108	0.00125722	0.000944889	0.000312327	0.000687571	-7.87e-05	0.000359628	3.09e-05	0.327869	medium heterogeneity
P57772	Selenocysteine-specific elongation factor (Elongation factor sec) (Eukaryotic elongation factor, selenocysteine-tRNA-specific)	EEFSEC	EEFSEC SELB	596	3	5.71704	0.00381888	0.000520498	0.00329838	0.00473412	0.00199208	0.00291009	0.00222158	0.0409836	medium heterogeneity
Q12805	EGF-containing fibulin-like extracellular matrix protein 1 (Extracellular protein S1-5) (Fibrillin-like protein) (Fibulin-3) (FIBL-3)	EFEMP1	EFEMP1 FBLN3 FBNL	493	5	5.09213	0.0138122	0.0063856	0.00742656	0.00912599	0.00578167	0.00726292	0.00615198	0.00273224	variable in BPH and ADCA
Q96C19	EF-hand domain-containing protein D2 (Swiprosin-1)	EFHD2	EFHD2 SWS1	240	3	4.92409	0.00418161	0.00312746	0.00105415	0.00297668	-0.00119383	0.00203047	-0.000387756	0.147541	medium heterogeneity
Q7Z2Z2	Elongation factor-like GTPase 1 (Elongation factor Tu GTP-binding domain-containing protein 1) (Elongation factor-like 1) (Protein FAM42A)	EFL1	EFL1 EFTUD1 FAM42A	1120	3	4.6536	0.0122167	0.00292718	0.0092895	0.00712542	0.00701172	0.0226151	0.0109126	0.00273224	variable in BPH and ADCA
Q15029	116 kDa U5 small nuclear ribonucleoprotein component (Elongation factor Tu GTP-binding domain-containing protein 2) (SNU114 homolog) (hSNU114) (U5 snRNP-specific protein, 116 kDa) (U5-116 kDa)	EFTUD2	EFTUD2 KIAA0031 SNRP116	972	7	5.26626	0.000941627	0.000592933	0.000348694	0.000898763	-7.8e-05	-2.14e-05	-6.39e-05	0.306011	medium heterogeneity
Q63HQ2	Pikachurin (Agrin-like protein) (EGF-like, fibronectin type-III and laminin G-like domain-containing protein)	EGFLAM	EGFLAM AGRINL AGRNL PIKA	1017	2	5.72679	0.0347374	0.0107316	0.0240058	0.0462591	0.00647012	0.00985268	0.00731576	0.00273224	variable in BPH
P00533	Epidermal growth factor receptor (EC 2.7.10.1) (Proto-oncogene c-ErbB-1) (Receptor tyrosine-protein kinase erbB-1)	EGFR	EGFR ERBB ERBB1 HER1	1210	4	5.58119	0.00152279	0.000904846	0.000617942	0.00127394	-0.000113818	0.000845217	0.000125941	0.213115	medium heterogeneity
Q8N3D4	EH domain-binding protein 1-like protein 1	EHBP1L1	EHBP1L1	1523	2	5.32179	0.0058197	0.00170433	0.00411537	0.00428346	0.0045842	0.00220465	0.00398931	0.0273224	medium heterogeneity
Q9H4M9	EH domain-containing protein 1 (PAST homolog 1) (hPAST1) (Testilin)	EHD1	EHD1 PAST PAST1 CDABP0131	534	5	5.38757	0.000962088	0.000578281	0.000383807	0.000572552	0.000202344	0.000361964	0.000242249	0.295082	medium heterogeneity
Q9NZN4	EH domain-containing protein 2 (PAST homolog 2)	EHD2	EHD2 PAST2	543	6	5.42816	0.00273571	0.00086739	0.00186831	0.00178397	0.000433648	0.00642536	0.00193158	0.0765027	medium heterogeneity
Q9NZN3	EH domain-containing protein 3 (PAST homolog 3)	EHD3	EHD3 EHD2 PAST3	535	2	5.95858	0.00279592	0.00033409	0.00246183	0.00201351	0.00130788	0.00726862	0.00279806	0.0546448	medium heterogeneity
Q9H223	EH domain-containing protein 4 (Hepatocellular carcinoma-associated protein 10/11) (PAST homolog 4)	EHD4	EHD4 HCA10 HCA11 PAST4 FKSG7	541	3	5.4638	0.00258933	0.000803521	0.00178581	0.00256033	0.000918133	0.00206526	0.00120491	0.0874317	medium heterogeneity
Q08426	Peroxisomal bifunctional enzyme (PBE) (PBFE) [Includes: Enoyl-CoA hydratase/3,2-trans-enoyl-CoA isomerase (EC 4.2.1.17) (EC 5.3.3.8); 3-hydroxyacyl-CoA dehydrogenase (EC 1.1.1.35)]	EHHADH	EHHADH ECHD	723	5	5.64603	0.00175922	0.00151224	0.000246981	0.000707865	0.000106887	-0.000715391	-9.87e-05	0.357923	stable in BPH and ADCA
Q9BY44	Eukaryotic translation initiation factor 2A (eIF-2A) (65 kDa eukaryotic translation initiation factor 2A) [Cleaved into: Eukaryotic translation initiation factor 2A, N-terminally processed]	EIF2A	EIF2A CDA02 MSTP004 MSTP089	585	3	5.29395	0.00199377	0.00126064	0.000733131	0.0014136	0.000196377	0.000301974	0.000222776	0.196721	medium heterogeneity
Q9BQI3	Eukaryotic translation initiation factor 2-alpha kinase 1 (EC 2.7.11.1) (Heme-controlled repressor) (HCR) (Heme-regulated eukaryotic initiation factor eIF-2-alpha kinase) (Heme-regulated inhibitor) (Hemin-sensitive initiation factor 2-alpha kinase)	EIF2AK1	EIF2AK1 HRI KIAA1369 PRO1362	630	2	5.84594	0.00555399	0.00363364	0.00192035	0.00310841	0.00125634	0.000348243	0.00102932	0.0765027	medium heterogeneity
P19525	Interferon-induced, double-stranded RNA-activated protein kinase (EC 2.7.11.1) (Eukaryotic translation initiation factor 2-alpha kinase 2) (eIF-2A protein kinase 2) (Interferon-inducible RNA-dependent protein kinase) (P1/eIF-2A protein kinase) (Protein kinase RNA-activated) (PKR) (Protein kinase R) (Tyrosine-protein kinase EIF2AK2) (EC 2.7.10.2) (p68 kinase)	EIF2AK2	EIF2AK2 PKR PRKR	551	3	5.09487	0.00340341	0.0013101	0.00209331	0.00187741	0.00139425	0.0048382	0.00225523	0.068306	medium heterogeneity
Q9P2K8	eIF-2-alpha kinase GCN2 (EC 2.7.11.1) (Eukaryotic translation initiation factor 2-alpha kinase 4) (GCN2-like protein)	EIF2AK4	EIF2AK4 GCN2 KIAA1338	1649	2	5.30551	0.0127214	0.00451635	0.00820504	0.00304726	0.0146699	0.0042837	0.0120734	0.00273224	variable in ADCA
Q14232	Translation initiation factor eIF-2B subunit alpha (eIF-2B GDP-GTP exchange factor subunit alpha)	EIF2B1	EIF2B1 EIF2BA	305	2	5.44386	0.00203081	0.00147079	0.00056002	-0.000233442	0.00180787	-0.000803151	0.00115512	0.226776	medium heterogeneity
P49770	Translation initiation factor eIF-2B subunit beta (S20I15) (S20III15) (eIF-2B GDP-GTP exchange factor subunit beta)	EIF2B2	EIF2B2 EIF2BB	351	2	5.33876	0.00344229	0.00189462	0.00154768	0.00208171	0.00139208	0.000412383	0.00114715	0.0983607	medium heterogeneity
Q9UI10	Translation initiation factor eIF-2B subunit delta (eIF-2B GDP-GTP exchange factor subunit delta)	EIF2B4	EIF2B4 EIF2BD	523	2	5.57311	0.0221679	0.00648349	0.0156844	0.0246004	0.0107917	0.0036145	0.0089974	0.00273224	variable in BPH
Q13144	Translation initiation factor eIF-2B subunit epsilon (eIF-2B GDP-GTP exchange factor subunit epsilon)	EIF2B5	EIF2B5 EIF2BE	721	2	5.27107	0.00264386	0.000730741	0.00191312	0.00289327	0.0012027	0.00110392	0.00117801	0.0765027	medium heterogeneity
P41214	Eukaryotic translation initiation factor 2D (eIF2d) (Hepatocellular carcinoma-associated antigen 56) (Ligatin)	EIF2D	EIF2D HCA56 LGTN	584	2	5.31151	0.0040692	0.000945204	0.003124	0.004473	0.00156215	0.00376255	0.00211225	0.0409836	medium heterogeneity
P05198	Eukaryotic translation initiation factor 2 subunit 1 (Eukaryotic translation initiation factor 2 subunit alpha) (eIF-2-alpha) (eIF-2A) (eIF-2alpha)	EIF2S1	EIF2S1 EIF2A	315	10	5.24767	0.00260479	0.000580906	0.00202388	0.00127514	0.00237871	0.00320561	0.00258543	0.0710383	medium heterogeneity
P20042	Eukaryotic translation initiation factor 2 subunit 2 (Eukaryotic translation initiation factor 2 subunit beta) (eIF-2-beta)	EIF2S2	EIF2S2 EIF2B	333	3	5.54112	0.00619399	0.00194815	0.00424584	0.00541319	0.00389996	0.00178144	0.00337033	0.0245902	medium heterogeneity
Q14152	Eukaryotic translation initiation factor 3 subunit A (eIF3a) (Eukaryotic translation initiation factor 3 subunit 10) (eIF-3-theta) (eIF3 p167) (eIF3 p180) (eIF3 p185)	EIF3A	EIF3A EIF3S10 KIAA0139	1382	12	4.89236	0.00162863	0.00106587	0.000562756	7.94e-05	0.000567554	0.00199831	0.000925242	0.226776	medium heterogeneity
P55884	Eukaryotic translation initiation factor 3 subunit B (eIF3b) (Eukaryotic translation initiation factor 3 subunit 9) (Prt1 homolog) (hPrt1) (eIF-3-eta) (eIF3 p110) (eIF3 p116)	EIF3B	EIF3B EIF3S9	814	9	5.41132	0.000729757	0.000218732	0.000511025	0.00033021	0.000641026	0.000663467	0.000646637	0.23224	medium heterogeneity
O15371	Eukaryotic translation initiation factor 3 subunit D (eIF3d) (Eukaryotic translation initiation factor 3 subunit 7) (eIF-3-zeta) (eIF3 p66)	EIF3D	EIF3D EIF3S7	548	4	5.39792	0.00246566	0.00134165	0.00112402	0.00106712	0.00145337	0.000306663	0.00116669	0.136612	medium heterogeneity
P60228	Eukaryotic translation initiation factor 3 subunit E (eIF3e) (Eukaryotic translation initiation factor 3 subunit 6) (Viral integration site protein INT-6 homolog) (eIF-3 p48)	EIF3E	EIF3E EIF3S6 INT6	445	5	5.24533	0.00441093	0.00380939	0.000601537	0.00216413	-0.000291479	-0.0014072	-0.00057041	0.218579	medium heterogeneity
O00303	Eukaryotic translation initiation factor 3 subunit F (eIF3f) (Deubiquitinating enzyme eIF3f) (EC 3.4.19.12) (Eukaryotic translation initiation factor 3 subunit 5) (eIF-3-epsilon) (eIF3 p47)	EIF3F	EIF3F EIF3S5	357	4	5.47164	0.00942532	0.00155176	0.00787356	0.00519575	0.0107453	0.00729183	0.00988191	0.00273224	variable in BPH and ADCA
O75821	Eukaryotic translation initiation factor 3 subunit G (eIF3g) (Eukaryotic translation initiation factor 3 RNA-binding subunit) (eIF-3 RNA-binding subunit) (Eukaryotic translation initiation factor 3 subunit 4) (eIF-3-delta) (eIF3 p42) (eIF3 p44)	EIF3G	EIF3G EIF3S4	320	5	5.16338	0.00208172	0.00179341	0.000288307	0.000535047	9.03e-05	0.00014206	0.000103252	0.34153	stable in BPH and ADCA
O15372	Eukaryotic translation initiation factor 3 subunit H (eIF3h) (Eukaryotic translation initiation factor 3 subunit 3) (eIF-3-gamma) (eIF3 p40 subunit)	EIF3H	EIF3H EIF3S3	352	4	5.40373	0.00223715	0.000810097	0.00142705	0.00121515	0.0014948	0.00185948	0.00158597	0.112022	medium heterogeneity
Q13347	Eukaryotic translation initiation factor 3 subunit I (eIF3i) (Eukaryotic translation initiation factor 3 subunit 2) (TGF-beta receptor-interacting protein 1) (TRIP-1) (eIF-3-beta) (eIF3 p36)	EIF3I	EIF3I EIF3S2 TRIP1	325	4	5.10821	0.0016576	0.000403133	0.00125447	0.00141558	0.00115519	0.00106897	0.00113363	0.128415	medium heterogeneity
Q9UBQ5	Eukaryotic translation initiation factor 3 subunit K (eIF3k) (Eukaryotic translation initiation factor 3 subunit 12) (Muscle-specific gene M9 protein) (PLAC-24) (eIF-3 p25) (eIF-3 p28)	EIF3K	EIF3K EIF3S12 ARG134 HSPC029 MSTP001 PTD001	218	4	4.05923	0.0184384	0.00659562	0.0118427	0.00483308	0.0218873	0.00273804	0.0171	0.00273224	variable in ADCA
Q9Y262	Eukaryotic translation initiation factor 3 subunit L (eIF3l) (Eukaryotic translation initiation factor 3 subunit 6-interacting protein) (Eukaryotic translation initiation factor 3 subunit E-interacting protein)	EIF3L	EIF3L EIF3EIP EIF3S6IP HSPC021 HSPC025 MSTP005	564	8	4.72617	0.00333176	0.00183243	0.00149933	0.00031101	0.0028673	0.000960402	0.00239058	0.103825	medium heterogeneity
Q7L2H7	Eukaryotic translation initiation factor 3 subunit M (eIF3m) (Fetal lung protein B5) (hFL-B5) (PCI domain-containing protein 1)	EIF3M	EIF3M HFLB5 PCID1 GA17 PNAS-125	374	2	5.12967	0.00239209	0.00138699	0.0010051	0.000941741	0.00125669	0.000440413	0.00105262	0.161202	medium heterogeneity
P60842	Eukaryotic initiation factor 4A-I (eIF-4A-I) (eIF4A-I) (EC 3.6.4.13) (ATP-dependent RNA helicase eIF4A-1)	EIF4A1	EIF4A1 DDX2A EIF4A	406	13	5.37124	0.00321327	0.00053684	0.00267643	0.00139211	0.00149749	0.0100662	0.00363966	0.0491803	medium heterogeneity
Q14240	Eukaryotic initiation factor 4A-II (eIF-4A-II) (eIF4A-II) (EC 3.6.4.13) (ATP-dependent RNA helicase eIF4A-2)	EIF4A2	EIF4A2 DDX2B EIF4F	407	7	5.51313	0.00183456	0.000575742	0.00125881	0.00208624	0.000806351	0.000133927	0.000638245	0.128415	medium heterogeneity
P38919	Eukaryotic initiation factor 4A-III (eIF-4A-III) (eIF4A-III) (EC 3.6.4.13) (ATP-dependent RNA helicase DDX48) (ATP-dependent RNA helicase eIF4A-3) (DEAD box protein 48) (Eukaryotic initiation factor 4A-like NUK-34) (Eukaryotic translation initiation factor 4A isoform 3) (Nuclear matrix protein 265) (NMP 265) (hNMP 265) [Cleaved into: Eukaryotic initiation factor 4A-III, N-terminally processed]	EIF4A3	EIF4A3 DDX48 KIAA0111	411	4	5.41561	0.00195779	0.00155188	0.000405911	0.000878071	-0.000396313	0.0013961	5.18e-05	0.284153	medium heterogeneity
P23588	Eukaryotic translation initiation factor 4B (eIF-4B)	EIF4B	EIF4B	611	3	4.82185	0.0124839	0.00297577	0.00950815	0.0197711	0.00129438	0.00336068	0.00181096	0.00273224	variable in BPH
P06730	Eukaryotic translation initiation factor 4E (eIF-4E) (eIF4E) (eIF-4F 25 kDa subunit) (mRNA cap-binding protein)	EIF4E	EIF4E EIF4EL1 EIF4F	217	2	4.77368	0.00750177	0.00337171	0.00413007	0.00810636	0.00248274	-0.00285681	0.00114785	0.0273224	medium heterogeneity
Q9NRA8	Eukaryotic translation initiation factor 4E transporter (4E-T) (eIF4E transporter) (Eukaryotic translation initiation factor 4E nuclear import factor 1)	EIF4ENIF1	EIF4ENIF1	985	2	5.40397	0.00257716	0.00171869	0.000858474	-0.000125584	0.0024441	-0.000946231	0.00159652	0.180328	medium heterogeneity
Q04637	Eukaryotic translation initiation factor 4 gamma 1 (eIF-4-gamma 1) (eIF-4G 1) (eIF-4G1) (p220)	EIF4G1	EIF4G1 EIF4F EIF4G EIF4GI	1599	6	5.09699	0.0010278	0.00100871	1.91e-05	0.000220425	-0.000450722	0.000824548	-0.000131904	0.480874	stable in BPH and ADCA
P78344	Eukaryotic translation initiation factor 4 gamma 2 (eIF-4-gamma 2) (eIF-4G 2) (eIF4G 2) (Death-associated protein 5) (DAP-5) (p97)	EIF4G2	EIF4G2 DAP5 OK/SW-cl.75	907	6	4.78179	0.00412952	0.00196209	0.00216743	0.00213218	0.00177028	0.00346464	0.00219387	0.0628415	medium heterogeneity
O43432	Eukaryotic translation initiation factor 4 gamma 3 (eIF-4-gamma 3) (eIF-4G 3) (eIF4G 3) (eIF-4-gamma II) (eIF4GII)	EIF4G3	EIF4G3	1585	3	5.81947	0.00375674	0.000707271	0.00304947	0.00518747	0.00179528	0.000398008	0.00144596	0.0409836	medium heterogeneity
Q15056	Eukaryotic translation initiation factor 4H (eIF-4H) (Williams-Beuren syndrome chromosomal region 1 protein)	EIF4H	EIF4H KIAA0038 WBSCR1 WSCR1	248	6	4.86398	0.00121177	0.000732838	0.000478937	3.93e-05	0.000985843	0.000276976	0.000808626	0.248634	medium heterogeneity
P55010	Eukaryotic translation initiation factor 5 (eIF-5)	EIF5	EIF5	431	3	4.95567	0.00530554	0.00207486	0.00323068	0.00375572	0.00188725	0.00568589	0.00283691	0.0409836	medium heterogeneity
P63241	Eukaryotic translation initiation factor 5A-1 (eIF-5A-1) (eIF-5A1) (Eukaryotic initiation factor 5A isoform 1) (eIF-5A) (Rev-binding factor) (eIF-4D)	EIF5A	EIF5A	154	5	5.051	0.0132693	0.00938998	0.00387928	-0.000618054	0.0108653	-0.00358693	0.00725228	0.0300546	medium heterogeneity
O60841	Eukaryotic translation initiation factor 5B (eIF-5B) (EC 3.6.5.3) (Translation initiation factor IF-2)	EIF5B	EIF5B IF2 KIAA0741	1220	3	5.04269	0.00324437	0.00190959	0.00133478	0.000164029	0.00268	0.000811385	0.00221285	0.120219	medium heterogeneity
P56537	Eukaryotic translation initiation factor 6 (eIF-6) (B(2)GCN homolog) (B4 integrin interactor) (CAB) (p27(BBP))	EIF6	EIF6 EIF3A ITGB4BP OK/SW-cl.27	245	3	5.05081	0.00206747	0.00106222	0.00100525	0.00222311	0.000153332	-9.26e-05	9.19e-05	0.161202	medium heterogeneity
Q53HC9	EARP-interacting protein (Endosome-associated recycling protein-interacting protein) (Tumor-suppressing STF cDNA 1 protein) (Tumor-suppressing subchromosomal transferable fragment candidate gene 1 protein)	EIPR1	EIPR1 TSSC1	387	2	5.40089	0.00533651	0.00278625	0.00255025	0.000920648	0.00500145	8.55e-05	0.00377246	0.0546448	medium heterogeneity
Q9BQ52	Zinc phosphodiesterase ELAC protein 2 (EC 3.1.26.11) (ElaC homolog protein 2) (Heredity prostate cancer protein 2) (Ribonuclease Z 2) (RNase Z 2) (tRNA 3 endonuclease 2) (tRNase Z 2)	ELAC2	ELAC2 HPC2	826	2	5.51849	0.00800066	0.00080958	0.00719108	0.0124366	0.00277535	0.00470182	0.00325697	0.00273224	variable in BPH
P08246	Neutrophil elastase (EC 3.4.21.37) (Bone marrow serine protease) (Elastase-2) (Human leukocyte elastase) (HLE) (Medullasin) (PMN elastase)	ELANE	ELANE ELA2	267	2	5.1671	0.0125381	0.00166465	0.0108735	0.0176119	0.00303352	0.0141783	0.0058197	0.00273224	variable in BPH
Q15717	ELAV-like protein 1 (Hu-antigen R) (HuR)	ELAVL1	ELAVL1 HUR	326	11	5.16262	0.0017778	0.000610693	0.00116711	0.00105108	0.000600953	0.00321366	0.00125413	0.13388	medium heterogeneity
P32519	ETS-related transcription factor Elf-1 (E74-like factor 1)	ELF1	ELF1	619	2	5.6288	0.0158182	0.00594493	0.00987323	0.0132568	0.00883086	0.00284957	0.00733554	0.00273224	variable in BPH and ADCA
Q96BJ8	Engulfment and cell motility protein 3	ELMO3	ELMO3	720	2	5.53475	0.00755322	0.00127827	0.00627494	0.00960683	0.00373539	0.00389793	0.00377603	0.00819672	variable in BPH
P15502	Elastin (Tropoelastin)	ELN	ELN	786	4	4.70599	0.0136716	0.00780268	0.00586894	0.00453456	0.00952166	-0.00108604	0.00686974	0.00819672	variable in BPH and ADCA
Q15370	Elongin-B (EloB) (Elongin 18 kDa subunit) (RNA polymerase II transcription factor SIII subunit B) (SIII p18) (Transcription elongation factor B polypeptide 2)	ELOB	ELOB TCEB2	118	3	5.24782	0.00347233	0.00101521	0.00245712	0.00370203	0.0014643	0.00170087	0.00152344	0.057377	medium heterogeneity
Q15369	Elongin-C (EloC) (Elongin 15 kDa subunit) (RNA polymerase II transcription factor SIII subunit C) (SIII p15) (Transcription elongation factor B polypeptide 1)	ELOC	ELOC TCEB1	112	2	6.10633	0.0116238	0.00316037	0.00846345	0.00412731	0.0157309	-0.000330629	0.0117156	0.00273224	variable in ADCA
O95163	Elongator complex protein 1 (ELP1) (IkappaB kinase complex-associated protein) (IKK complex-associated protein) (p150)	ELP1	ELP1 IKAP IKBKAP	1332	2	5.08058	0.0129085	0.00908872	0.00381979	0.00122819	0.00745005	0.000703783	0.00576348	0.0300546	medium heterogeneity
Q6IA86	Elongator complex protein 2 (ELP2) (SHINC-2) (STAT3-interacting protein 1) (StIP1)	ELP2	ELP2 STATIP1	826	2	5.46072	0.0069325	0.00265167	0.00428083	0.0009415	0.00868846	0.00107591	0.00678532	0.0245902	medium heterogeneity
Q9H9T3	Elongator complex protein 3 (hELP3) (EC 2.3.1.48)	ELP3	ELP3	547	2	5.13578	0.00291319	0.00197345	0.000939731	0.00111773	0.000380602	0.00208312	0.000806232	0.166667	medium heterogeneity
Q8N766	ER membrane protein complex subunit 1	EMC1	EMC1 KIAA0090 PSEC0263	993	2	6.09703	0.00243094	0.00134612	0.00108482	0.00270075	-0.00023331	0.000191469	-0.000127115	0.144809	medium heterogeneity
Q92979	Ribosomal RNA small subunit methyltransferase NEP1 (EC 2.1.1.-) (18S rRNA (pseudouridine(1248)-N1)-methyltransferase) (18S rRNA Psi1248 methyltransferase) (Nucleolar protein EMG1 homolog) (Protein C2f) (Ribosome biogenesis protein NEP1)	EMG1	EMG1 C2F	244	2	5.3175	0.00497493	0.000906587	0.00406834	0.00633094	0.00140909	0.00525835	0.0023714	0.0273224	medium heterogeneity
Q9Y6C2	EMILIN-1 (Elastin microfibril interface-located protein 1) (Elastin microfibril interfacer 1)	EMILIN1	EMILIN1 EMI	1016	13	5.3046	0.00478338	0.000357381	0.004426	0.00621576	0.00292906	0.00354756	0.00308369	0.0191257	medium heterogeneity
O00423	Echinoderm microtubule-associated protein-like 1 (EMAP-1) (HuEMAP-1)	EML1	EML1 EMAP1 EMAPL EMAPL1	815	2	5.5625	0.00230015	0.00163838	0.000661781	0.000222256	0.000694884	0.00188104	0.000991424	0.20765	medium heterogeneity
O95834	Echinoderm microtubule-associated protein-like 2 (EMAP-2) (HuEMAP-2)	EML2	EML2 EMAP2 EMAPL2	649	6	5.40289	0.00221825	0.000698146	0.00152011	0.0013667	0.00119566	0.00295367	0.00163516	0.101093	medium heterogeneity
Q32P44	Echinoderm microtubule-associated protein-like 3 (EMAP-3)	EML3	EML3	896	3	5.59942	0.0046718	0.00223556	0.00243624	0.00308387	0.0017299	0.00261239	0.00195053	0.057377	medium heterogeneity
Q9HC35	Echinoderm microtubule-associated protein-like 4 (EMAP-4) (Restrictedly overexpressed proliferation-associated protein) (Ropp 120)	EML4	EML4 C2orf2 EMAPL4	981	4	5.558	0.00760002	0.00145398	0.00614604	0.007336	0.00241458	0.0137705	0.00525356	0.00819672	variable in BPH and ADCA
O94919	Endonuclease domain-containing 1 protein (EC 3.1.30.-)	ENDOD1	ENDOD1 KIAA0830	500	5	4.90311	0.00151344	0.000623812	0.000889623	0.0015172	0.000151732	0.00122058	0.000418944	0.177596	medium heterogeneity
P06733	Alpha-enolase (EC 4.2.1.11) (2-phospho-D-glycerate hydro-lyase) (C-myc promoter-binding protein) (Enolase 1) (MBP-1) (MPB-1) (Non-neural enolase) (NNE) (Phosphopyruvate hydratase) (Plasminogen-binding protein)	ENO1	ENO1 ENO1L1 MBPB1 MPB1	434	19	5.42482	0.00200824	0.00151434	0.0004939	-0.000276298	0.000961072	0.00140298	0.00107155	0.237705	medium heterogeneity
Q9UHY7	Enolase-phosphatase E1 (EC 3.1.3.77) (2,3-diketo-5-methylthio-1-phosphopentane phosphatase) (MASA homolog)	ENOPH1	ENOPH1 MASA MSTP145	261	2	5.0926	0.00730404	0.00138538	0.00591866	0.00949344	0.00436692	-0.000150433	0.00323758	0.00819672	variable in BPH
O75356	Ectonucleoside triphosphate diphosphohydrolase 5 (NTPDase 5) (EC 3.6.1.6) (CD39 antigen-like 4) (ER-UDPase) (Guanosine-diphosphatase ENTPD5) (GDPase ENTPD5) (EC 3.6.1.42) (Nucleoside diphosphatase) (Uridine-diphosphatase ENTPD5) (UDPase ENTPD5)	ENTPD5	ENTPD5 CD39L4 PCPH	428	5	4.70889	0.00581723	0.0044136	0.00140363	-0.000128791	0.0025207	0.00264966	0.00255294	0.114754	medium heterogeneity
P11171	Protein 4.1 (P4.1) (4.1R) (Band 4.1) (EPB4.1)	EPB41	EPB41 E41P	864	3	5.11161	0.00450127	0.0022505	0.00225077	0.00413266	-0.000205741	0.0039746	0.000839344	0.0601093	medium heterogeneity
O43491	Band 4.1-like protein 2 (Generally expressed protein 4.1) (4.1G)	EPB41L2	EPB41L2	1005	5	5.1797	0.00191718	0.000654231	0.00126295	0.00217418	0.000739562	9.94e-05	0.000579529	0.128415	medium heterogeneity
P16422	Epithelial cell adhesion molecule (Ep-CAM) (Adenocarcinoma-associated antigen) (Cell surface glycoprotein Trop-1) (Epithelial cell surface antigen) (Epithelial glycoprotein) (EGP) (Epithelial glycoprotein 314) (EGP314) (hEGP314) (KS 1/4 antigen) (KSA) (Major gastrointestinal tumor-associated protein GA733-2) (Tumor-associated calcium signal transducer 1) (CD antigen CD326)	EPCAM	EPCAM GA733-2 M1S2 M4S1 MIC18 TACSTD1 TROP1	314	5	5.17943	0.00109353	0.000641429	0.0004521	0.000451431	0.000120062	0.00145023	0.000452603	0.259563	medium heterogeneity
Q9HCE0	Ectopic P granules protein 5 homolog	EPG5	EPG5 KIAA1632	2579	2	5.59928	0.0182175	0.00550866	0.0127089	0.00815162	0.0166782	0.0144724	0.0161268	0.00273224	variable in BPH and ADCA
P29317	Ephrin type-A receptor 2 (EC 2.7.10.1) (Epithelial cell kinase) (Tyrosine-protein kinase receptor ECK)	EPHA2	EPHA2 ECK	976	3	5.84606	0.0182876	0.00389792	0.0143897	0.0189793	0.00965828	0.0148151	0.0109475	0.00273224	variable in BPH and ADCA
P54760	Ephrin type-B receptor 4 (EC 2.7.10.1) (Hepatoma transmembrane kinase) (Tyrosine-protein kinase TYRO11)	EPHB4	EPHB4 HTK MYK1 TYRO11	987	3	5.68011	0.00202586	0.000231961	0.0017939	0.00156634	0.00123733	0.0041463	0.00196458	0.0874317	medium heterogeneity
P07099	Epoxide hydrolase 1 (EC 3.3.2.9) (Epoxide hydratase) (Microsomal epoxide hydrolase) (mEH)	EPHX1	EPHX1 EPHX EPOX	455	5	5.01533	0.00399397	0.00174544	0.00224853	0.00443848	0.000903129	-0.00028511	0.000606069	0.0601093	medium heterogeneity
P34913	Bifunctional epoxide hydrolase 2 [Includes: Cytosolic epoxide hydrolase 2 (CEH) (EC 3.3.2.10) (Epoxide hydratase) (Soluble epoxide hydrolase) (SEH); Lipid-phosphate phosphatase (EC 3.1.3.76)]	EPHX2	EPHX2	555	8	5.06062	0.00297383	0.000680079	0.00229375	0.00232161	0.00284758	0.000548718	0.00227286	0.0601093	medium heterogeneity
Q9Y6I3	Epsin-1 (EH domain-binding mitotic phosphoprotein) (EPS-15-interacting protein 1)	EPN1	EPN1	576	2	4.99845	0.00449312	0.00184734	0.00264579	0.00355071	0.00138062	0.00372651	0.00196709	0.0491803	medium heterogeneity
P58107	Epiplakin (450 kDa epidermal antigen)	EPPK1	EPPK1 EPIPL	5090	4	4.88472	0.0098847	0.00738817	0.00249653	0.00424301	0.00105129	0.0015928	0.00118667	0.0546448	medium heterogeneity
P42566	Epidermal growth factor receptor substrate 15 (Protein Eps15) (Protein AF-1p)	EPS15	EPS15 AF1P	896	3	5.64276	0.00204677	0.000247979	0.0017988	0.00206756	0.00143624	0.00208015	0.00159722	0.0846995	medium heterogeneity
Q9UBC2	Epidermal growth factor receptor substrate 15-like 1 (Eps15-related protein) (Eps15R)	EPS15L1	EPS15L1 EPS15R	864	3	5.51976	0.0041655	0.000883581	0.00328192	0.00361325	0.00145239	0.00777652	0.00303342	0.0409836	medium heterogeneity
Q12929	Epidermal growth factor receptor kinase substrate 8	EPS8	EPS8	822	2	5.88758	0.00218192	0.00119305	0.000988876	0.0022818	-4.09e-05	0.000199453	1.92e-05	0.166667	medium heterogeneity
Q8TE68	Epidermal growth factor receptor kinase substrate 8-like protein 1 (EPS8-like protein 1) (Epidermal growth factor receptor pathway substrate 8-related protein 1) (EPS8-related protein 1)	EPS8L1	EPS8L1 DRC3 EPS8R1 PP10566	723	2	5.9217	0.0534338	0.0364226	0.0170112	0.0238346	0.0115666	0.012875	0.0118937	0.00273224	variable in BPH
Q9H6S3	Epidermal growth factor receptor kinase substrate 8-like protein 2 (EPS8-like protein 2) (Epidermal growth factor receptor pathway substrate 8-related protein 2) (EPS8-related protein 2)	EPS8L2	EPS8L2 EPS8R2 PP13181	715	2	6.21521	0.00222272	0.000387451	0.00183526	0.00313455	0.000780273	0.00110237	0.000860798	0.0819672	medium heterogeneity
P11678	Eosinophil peroxidase (EPO) (EC 1.11.1.7) [Cleaved into: Eosinophil peroxidase light chain; Eosinophil peroxidase heavy chain]	EPX	EPX EPER EPO EPP	715	3	5.36928	0.001371	0.00110569	0.000265307	0.000455109	6.97e-05	0.000282715	0.000122956	0.349727	stable in BPH and ADCA
Q9NZ08	Endoplasmic reticulum aminopeptidase 1 (EC 3.4.11.-) (ARTS-1) (Adipocyte-derived leucine aminopeptidase) (A-LAP) (Aminopeptidase PILS) (Puromycin-insensitive leucyl-specific aminopeptidase) (PILS-AP) (Type 1 tumor necrosis factor receptor shedding aminopeptidase regulator)	ERAP1	ERAP1 APPILS ARTS1 KIAA0525 UNQ584/PRO1154	941	8	5.18705	0.00150245	0.000401635	0.00110081	0.0016752	0.000327699	0.001697	0.000670025	0.142077	medium heterogeneity
Q96RT1	Erbin (Densin-180-like protein) (Erbb2-interacting protein) (Protein LAP2)	ERBIN	ERBIN ERBB2IP KIAA1225 LAP2	1412	2	3.74983	0.0108467	0.00613242	0.00471426	0.00375588	0.00615133	0.00327819	0.00543305	0.0191257	medium heterogeneity
Q8IUD2	ELKS/Rab6-interacting/CAST family member 1 (ERC-1) (Rab6-interacting protein 2)	ERC1	ERC1 ELKS KIAA1081 RAB6IP2	1116	3	5.58661	0.00218335	0.00053239	0.00165096	0.00213635	0.000773991	0.00282573	0.00128692	0.0901639	medium heterogeneity
P19447	General transcription and DNA repair factor IIH helicase subunit XPB (TFIIH subunit XPB) (EC 3.6.4.12) (Basic transcription factor 2 89 kDa subunit) (BTF2 p89) (DNA excision repair protein ERCC-3) (DNA repair protein complementing XP-B cells) (TFIIH basal transcription factor complex 89 kDa subunit) (TFIIH 89 kDa subunit) (TFIIH p89) (Xeroderma pigmentosum group B-complementing protein)	ERCC3	ERCC3 XPB XPBC	782	2	5.99032	0.00633686	0.00292804	0.00340883	0.00487552	0.00181958	0.00377648	0.0023088	0.0409836	medium heterogeneity
Q2NKX8	DNA excision repair protein ERCC-6-like (EC 3.6.4.12) (ATP-dependent helicase ERCC6-like) (PLK1-interacting checkpoint helicase) (Tumor antigen BJ-HCC-15)	ERCC6L	ERCC6L PICH	1250	3	5.17812	0.00762806	0.00661276	0.0010153	0.000496732	0.00279193	-0.00275891	0.00140422	0.155738	medium heterogeneity
Q969X5	Endoplasmic reticulum-Golgi intermediate compartment protein 1 (ER-Golgi intermediate compartment 32 kDa protein) (ERGIC-32)	ERGIC1	ERGIC1 ERGIC32 KIAA1181 HT034	290	9	5.28332	0.00493093	0.000868295	0.00406263	0.00404177	0.0018246	0.0108393	0.00407827	0.0273224	medium heterogeneity
P84090	Enhancer of rudimentary homolog	ERH	ERH	104	2	4.92023	0.00719646	0.0024987	0.00469776	0.00111465	0.0082686	0.0047346	0.0073851	0.0191257	medium heterogeneity
Q8IV48	3'-5' exoribonuclease 1 (EC 3.1.-.-) (3'-5' exonuclease ERI1) (Eri-1 homolog) (Histone mRNA 3'-end-specific exoribonuclease) (Histone mRNA 3'-exonuclease 1) (Protein 3'hExo) (HEXO)	ERI1	ERI1 3'EXO THEX1	349	2	5.69134	0.0058672	0.000633361	0.00523384	0.00713494	0.00250855	0.00770643	0.00380802	0.0136612	medium heterogeneity
Q96DZ1	Endoplasmic reticulum lectin 1 (ER lectin) (Erlectin) (XTP3-transactivated gene B protein)	ERLEC1	ERLEC1 C2orf30 XTP3TPB UNQ1878/PRO4321	483	2	5.06473	0.00517125	0.00489085	0.000280395	0.000887968	0.000257746	-0.00147437	-0.000175284	0.34153	stable in BPH and ADCA
O94905	Erlin-2 (Endoplasmic reticulum lipid raft-associated protein 2) (Stomatin-prohibitin-flotillin-HflC/K domain-containing protein 2) (SPFH domain-containing protein 2)	ERLIN2	ERLIN2 C8orf2 SPFH2 UNQ2441/PRO5003/PRO9924	339	7	5.26753	0.00321053	0.00107887	0.00213166	0.00402354	0.000542525	0.00122342	0.000712749	0.0655738	medium heterogeneity
Q96HE7	ERO1-like protein alpha (ERO1-L) (ERO1-L-alpha) (EC 1.8.4.-) (Endoplasmic oxidoreductin-1-like protein) (Endoplasmic reticulum oxidoreductase alpha) (Oxidoreductin-1-L-alpha)	ERO1A	ERO1A ERO1L UNQ434/PRO865	468	2	4.98611	0.00653911	0.0054757	0.00106341	-0.00183317	0.00282617	0.0044649	0.00323585	0.147541	medium heterogeneity
P30040	Endoplasmic reticulum resident protein 29 (ERp29) (Endoplasmic reticulum resident protein 28) (ERp28) (Endoplasmic reticulum resident protein 31) (ERp31)	ERP29	ERP29 C12orf8 ERP28	261	7	5.45109	0.00472371	9.56e-05	0.00462816	0.00589842	0.00320143	0.00509754	0.00367546	0.0191257	medium heterogeneity
Q9BS26	Endoplasmic reticulum resident protein 44 (ER protein 44) (ERp44) (Thioredoxin domain-containing protein 4)	ERP44	ERP44 KIAA0573 TXNDC4 UNQ532/PRO1075	406	7	5.20083	0.00122515	0.000241272	0.00098388	0.00129481	0.000517464	0.00145033	0.000750681	0.166667	medium heterogeneity
P10768	S-formylglutathione hydrolase (FGH) (EC 3.1.2.12) (Esterase D) (Methylumbelliferyl-acetate deacetylase) (EC 3.1.1.56)	ESD	ESD	282	8	5.33932	0.001209	0.000515621	0.000693377	0.000769366	0.000413366	0.00130545	0.000636386	0.204918	medium heterogeneity
Q9H6T0	Epithelial splicing regulatory protein 2 (RNA-binding motif protein 35B) (RNA-binding protein 35B)	ESRP2	ESRP2 RBM35B PP7059	727	2	5.33258	0.00228855	0.0014854	0.000803152	0.000706069	0.00122488	-0.000170774	0.000875964	0.185792	medium heterogeneity
Q9BSJ8	Extended synaptotagmin-1 (E-Syt1) (Membrane-bound C2 domain-containing protein)	ESYT1	ESYT1 FAM62A KIAA0747 MBC2	1104	4	4.44709	0.00682182	0.00389456	0.00292726	0.00412082	0.00275037	-0.000122717	0.0020321	0.0409836	medium heterogeneity
A0FGR8	Extended synaptotagmin-2 (E-Syt2) (Chr2Syt)	ESYT2	ESYT2 FAM62B KIAA1228	921	3	5.78943	0.00793072	0.000574331	0.00735639	0.00576819	0.00969821	0.00509551	0.00854754	0.00273224	variable in BPH and ADCA
P62495	Eukaryotic peptide chain release factor subunit 1 (Eukaryotic release factor 1) (eRF1) (Protein Cl1) (TB3-1)	ETF1	ETF1 ERF1 RF1 SUP45L1	437	6	5.30737	0.00364262	0.000467692	0.00317492	0.00447123	0.00157139	0.00409659	0.00220269	0.0409836	medium heterogeneity
P13804	Electron transfer flavoprotein subunit alpha, mitochondrial (Alpha-ETF)	ETFA	ETFA	333	11	5.17927	0.00265634	0.000268271	0.00238807	0.00229654	0.00194438	0.00399373	0.00245672	0.057377	medium heterogeneity
P38117	Electron transfer flavoprotein subunit beta (Beta-ETF)	ETFB	ETFB FP585	255	10	5.2385	0.00165283	0.000719202	0.000933625	0.000827131	0.000250985	0.00330103	0.0010135	0.166667	medium heterogeneity
Q16134	Electron transfer flavoprotein-ubiquinone oxidoreductase, mitochondrial (ETF-QO) (ETF-ubiquinone oxidoreductase) (EC 1.5.5.1) (Electron-transferring-flavoprotein dehydrogenase) (ETF dehydrogenase)	ETFDH	ETFDH	617	5	5.33016	0.00701129	0.00408764	0.00292365	0.00355754	0.00270326	0.00168318	0.00244824	0.0409836	medium heterogeneity
O95571	Persulfide dioxygenase ETHE1, mitochondrial (EC 1.13.11.18) (Ethylmalonic encephalopathy protein 1) (Hepatoma subtracted clone one protein) (Sulfur dioxygenase ETHE1)	ETHE1	ETHE1 HSCO	254	3	5.05236	0.00273573	0.00119028	0.00154544	0.00112799	0.00226321	0.000644495	0.00185853	0.0983607	medium heterogeneity
Q9UI08	Ena/VASP-like protein (Ena/vasodilator-stimulated phosphoprotein-like)	EVL	EVL RNB6	416	2	5.7121	0.00221752	0.00095826	0.00125926	0.000371159	0.000795739	0.00531413	0.00192534	0.128415	medium heterogeneity
Q92817	Envoplakin (210 kDa cornified envelope precursor protein) (210 kDa paraneoplastic pemphigus antigen) (p210)	EVPL	EVPL	2033	3	5.86909	0.00279121	0.00179844	0.000992768	0.00248686	7.11e-05	-0.000724568	-0.000127799	0.163934	medium heterogeneity
Q01844	RNA-binding protein EWS (EWS oncogene) (Ewing sarcoma breakpoint region 1 protein)	EWSR1	EWSR1 EWS	656	5	5.08335	0.00435804	0.000781957	0.00357609	0.00271783	0.00337569	0.00675206	0.00421978	0.0355191	medium heterogeneity
Q9NV70	Exocyst complex component 1 (Exocyst complex component Sec3)	EXOC1	EXOC1 SEC3 SEC3L1 BM-012	894	2	5.16232	0.00513639	0.00303653	0.00209987	0.00264135	-0.000122361	0.00714212	0.00169376	0.068306	medium heterogeneity
O60645	Exocyst complex component 3 (Exocyst complex component Sec6)	EXOC3	EXOC3 SEC6 SEC6L1	756	3	5.46533	0.00309178	0.00150461	0.00158718	0.00237761	0.000914463	0.00123403	0.000994355	0.0928962	medium heterogeneity
Q96A65	Exocyst complex component 4 (Exocyst complex component Sec8)	EXOC4	EXOC4 KIAA1699 SEC8 SEC8L1	974	3	5.40967	0.00350045	0.00182065	0.00167979	0.00343764	-0.000133709	0.00184678	0.000361413	0.0901639	medium heterogeneity
Q8TAG9	Exocyst complex component 6 (Exocyst complex component Sec15A) (SEC15-like protein 1)	EXOC6	EXOC6 SEC15A SEC15L SEC15L1	804	3	6.03706	0.00111296	0.000420354	0.000692604	0.000560451	0.000319223	0.00220921	0.000791718	0.204918	medium heterogeneity
Q01780	Exosome component 10 (EC 3.1.13.-) (Autoantigen PM/Scl 2) (P100 polymyositis-scleroderma overlap syndrome-associated autoantigen) (Polymyositis/scleroderma autoantigen 100 kDa) (PM/Scl-100) (Polymyositis/scleroderma autoantigen 2)	EXOSC10	EXOSC10 PMSCL PMSCL2 RRP6	885	3	6.02177	0.00708833	0.000599881	0.00648845	0.0118091	0.00278049	0.00165044	0.00249798	0.00819672	variable in BPH
Q5RKV6	Exosome complex component MTR3 (Exosome component 6) (mRNA transport regulator 3 homolog) (hMtr3) (p11)	EXOSC6	EXOSC6 MTR3	272	2	5.10672	0.00877832	0.00210026	0.00667807	0.00425511	0.00646293	0.0145923	0.00849528	0.00819672	variable in BPH and ADCA
Q96B26	Exosome complex component RRP43 (Exosome component 8) (Opa-interacting protein 2) (OIP-2) (Ribosomal RNA-processing protein 43) (p9)	EXOSC8	EXOSC8 OIP2 RRP43	276	2	5.47585	0.00370679	0.00175852	0.00194827	0.003828	-1.74e-06	0.00215909	0.000538471	0.0737705	medium heterogeneity
Q99504	Eyes absent homolog 3 (EC 3.1.3.48)	EYA3	EYA3	573	2	3.67972	0.0135584	0.00850292	0.00505551	-0.0037758	0.0125239	0.00914438	0.011679	0.0163934	medium heterogeneity
O95677	Eyes absent homolog 4 (EC 3.1.3.48)	EYA4	EYA4	639	2	5.01804	0.00303133	0.00245159	0.000579733	0.00125629	0.000248409	-0.000455977	7.23e-05	0.224044	medium heterogeneity
P15311	Ezrin (Cytovillin) (Villin-2) (p81)	EZR	EZR VIL2	586	11	5.41139	0.00176228	0.000189025	0.00157326	0.00254279	0.00051415	0.00184198	0.000846108	0.0956284	medium heterogeneity
P03951	Coagulation factor XI (FXI) (EC 3.4.21.27) (Plasma thromboplastin antecedent) (PTA) [Cleaved into: Coagulation factor XIa heavy chain; Coagulation factor XIa light chain]	F11	F11	625	2	5.11111	0.0187108	0.0014691	0.0172417	0.00682121	0.0223793	0.0330904	0.0250571	0.00273224	variable in ADCA
P00488	Coagulation factor XIII A chain (Coagulation factor XIIIa) (EC 2.3.2.13) (Protein-glutamine gamma-glutamyltransferase A chain) (Transglutaminase A chain)	F13A1	F13A1 F13A	732	4	4.83051	0.00687767	0.00167278	0.00520489	0.00429656	0.00430832	0.0106195	0.00588613	0.0163934	medium heterogeneity
P05160	Coagulation factor XIII B chain (Fibrin-stabilizing factor B subunit) (Protein-glutamine gamma-glutamyltransferase B chain) (Transglutaminase B chain)	F13B	F13B	661	2	5.49964	0.00188609	0.00167516	0.000210937	0.000259396	-0.00047183	0.00211387	0.000174594	0.379781	stable in BPH and ADCA
P00734	Prothrombin (EC 3.4.21.5) (Coagulation factor II) [Cleaved into: Activation peptide fragment 1; Activation peptide fragment 2; Thrombin light chain; Thrombin heavy chain]	F2	F2	622	4	5.41493	0.00363758	0.00117945	0.00245812	0.00349134	0.000641087	0.00480957	0.00168321	0.057377	medium heterogeneity
P12259	Coagulation factor V (Activated protein C cofactor) (Proaccelerin, labile factor) [Cleaved into: Coagulation factor V heavy chain; Coagulation factor V light chain]	F5	F5	2224	5	5.03433	0.0140019	0.0120268	0.00197508	0.00247296	-0.00160376	0.0112179	0.00160166	0.0710383	medium heterogeneity
P00740	Coagulation factor IX (EC 3.4.21.22) (Christmas factor) (Plasma thromboplastin component) (PTC) [Cleaved into: Coagulation factor IXa light chain; Coagulation factor IXa heavy chain]	F9	F9	461	3	5.61968	0.0047736	0.00111673	0.00365687	0.00531597	0.00128267	0.00580217	0.00241254	0.0327869	medium heterogeneity
O00519	Fatty-acid amide hydrolase 1 (EC 3.5.1.99) (Anandamide amidohydrolase 1) (Oleamide hydrolase 1)	FAAH	FAAH FAAH1	579	2	4.64814	0.0160356	0.005939	0.0100966	0.0026155	0.0161975	0.014237	0.0157074	0.00273224	variable in ADCA
P05413	Fatty acid-binding protein, heart (Fatty acid-binding protein 3) (Heart-type fatty acid-binding protein) (H-FABP) (Mammary-derived growth inhibitor) (MDGI) (Muscle fatty acid-binding protein) (M-FABP)	FABP3	FABP3 FABP11 MDGI	133	7	5.25911	0.00890381	0.00107156	0.00783226	0.00342733	0.00446525	0.031148	0.0111359	0.00273224	variable in ADCA
Q01469	Fatty acid-binding protein, epidermal (Epidermal-type fatty acid-binding protein) (E-FABP) (Fatty acid-binding protein 5) (Psoriasis-associated fatty acid-binding protein homolog) (PA-FABP)	FABP5	FABP5	135	9	5.46963	0.0111819	0.00148862	0.00969325	0.00517946	0.0125337	0.0147133	0.0130786	0.00273224	variable in ADCA
Q9UNN5	FAS-associated factor 1 (hFAF1) (UBX domain-containing protein 12) (UBX domain-containing protein 3A)	FAF1	FAF1 UBXD12 UBXN3A CGI-03	650	3	5.31452	0.00115511	0.000292529	0.000862578	0.00182034	0.000236619	-0.000132844	0.000144254	0.180328	medium heterogeneity
P16930	Fumarylacetoacetase (FAA) (EC 3.7.1.2) (Beta-diketonase) (Fumarylacetoacetate hydrolase)	FAH	FAH	419	3	5.15994	0.0148648	0.00114375	0.013721	0.0175885	0.00916436	0.0157885	0.0108204	0.00273224	variable in BPH and ADCA
Q6P587	Acylpyruvase FAHD1, mitochondrial (EC 3.7.1.5) (Fumarylacetoacetate hydrolase domain-containing protein 1) (FAH domain-containing protein 1) (Oxaloacetate decarboxylase) (OAA decarboxylase) (EC 4.1.1.3) (YisK-like protein)	FAHD1	FAHD1 C16orf36 YISKL	224	3	5.95899	0.00413994	0.00128763	0.00285231	0.00460125	-6.53e-05	0.00635823	0.00154061	0.0409836	medium heterogeneity
Q8IWE2	Protein NOXP20 (Nervous system overexpressed protein 20) (Protein FAM114A1)	FAM114A1	FAM114A1 NOXP20	563	7	5.25287	0.00190899	0.000736214	0.00117278	0.00141242	0.000631918	0.00207643	0.000993045	0.13388	medium heterogeneity
Q6P1L5	Protein FAM117B (Amyotrophic lateral sclerosis 2 chromosomal region candidate gene 13 protein)	FAM117B	FAM117B ALS2CR13	589	2	5.37822	0.00812736	0.00606195	0.00206541	0.00182564	0.00116791	0.00547724	0.00224524	0.068306	medium heterogeneity
Q9NZB2	Constitutive coactivator of PPAR-gamma-like protein 1 (Oxidative stress-associated Src activator) (Protein FAM120A)	FAM120A	FAM120A C9orf10 KIAA0183 OSSA	1118	7	5.45332	0.00283604	0.000593075	0.00224296	0.00288935	0.00122175	0.00336742	0.00175817	0.0601093	medium heterogeneity
Q96EK7	Constitutive coactivator of peroxisome proliferator-activated receptor gamma (Constitutive coactivator of PPAR-gamma) (Constitutive coactivator of PPARG) (PPARG constitutive coactivator 1) (PGCC1) (Protein FAM120B)	FAM120B	FAM120B CCPG KIAA1838	910	2	5.24943	0.011818	0.000971647	0.0108464	0.0127977	0.00444653	0.024192	0.00938289	0.00273224	variable in BPH and ADCA
Q9BYI3	Hyccin (Down-regulated by CTNNB1 protein A) (Protein FAM126A)	FAM126A	FAM126A DRCTNNB1A	521	2	5.1692	0.00942484	0.00641793	0.00300691	0.00524045	-0.00272684	0.0135075	0.00133176	0.0409836	medium heterogeneity
Q9BZQ8	Protein Niban (Cell growth-inhibiting gene 39 protein) (Protein FAM129A)	FAM129A	FAM129A C1orf24 NIBAN GIG39	928	3	4.30153	0.0156896	0.0091325	0.00655706	0.00477137	0.00299277	0.022607	0.00789633	0.00819672	variable in BPH and ADCA
Q96TA1	Niban-like protein 1 (Meg-3) (Melanoma invasion by ERK) (MINERVA) (Protein FAM129B)	FAM129B	FAM129B C9orf88	746	6	4.96441	0.00555283	0.00409857	0.00145426	0.00338269	-0.00111369	0.00337285	7.95e-06	0.103825	medium heterogeneity
Q5W0V3	Protein FAM160B1	FAM160B1	FAM160B1 KIAA1600	765	2	5.47967	0.0108547	0.0087038	0.00215087	0.0101008	-0.00497068	-0.000334395	-0.00381161	0.0655738	medium heterogeneity
Q96A26	Protein FAM162A (E2-induced gene 5 protein) (Growth and transformation-dependent protein) (HGTD-P)	FAM162A	FAM162A C3orf28 E2IG5 DC16 FWP001	154	2	5.2718	0.015792	0.015623	0.000169007	0.010699	-0.007173	-0.00939504	-0.00772851	0.398907	stable in BPH and ADCA
Q8N128	Protein FAM177A1	FAM177A1	FAM177A1 C14orf24	213	2	5.24964	0.00646594	0.00560035	0.000865594	-0.000654996	0.00183084	0.00253161	0.00200604	0.180328	medium heterogeneity
Q8IYM0	Protein FAM186B	FAM186B	FAM186B C12orf25	893	2	5.65379	0.00267579	0.00138132	0.00129448	0.000855235	0.00176221	0.001209	0.00162391	0.128415	medium heterogeneity
Q9UK61	Protein TASOR (CTCL tumor antigen se89-1) (Retinoblastoma-associated protein RAP140) (Transgene activation suppressor protein)	FAM208A	FAM208A C3orf63 KIAA1105 TASOR	1670	2	5.59134	0.00676943	0.000714918	0.00605451	0.00639321	0.00379399	0.01182	0.00580048	0.00819672	variable in BPH and ADCA
Q9BRX8	Redox-regulatory protein FAM213A (Peroxiredoxin-like 2 activated in M-CSF stimulated monocytes) (Protein PAMM)	FAM213A	FAM213A C10orf58 PAMM PRO2290 PSEC0139 UNQ611/PRO1198	229	4	5.29148	0.00576221	0.00105126	0.00471095	0.00154288	0.00768344	0.00529773	0.00708701	0.0191257	medium heterogeneity
Q92520	Protein FAM3C (Interleukin-like EMT inducer)	FAM3C	FAM3C ILEI GS3786	227	4	4.5962	0.00494589	0.00329384	0.00165205	0.00309444	0.000224076	0.0016088	0.000570256	0.0901639	medium heterogeneity
Q9NUQ9	Protein FAM49B (L1)	FAM49B	FAM49B BM-009	324	2	5.31019	0.0183694	0.0132342	0.00513525	0.00620943	0.00248652	0.00985884	0.0043296	0.0163934	medium heterogeneity
Q14153	Protein FAM53B (Protein simplet)	FAM53B	FAM53B KIAA0140 SMP	422	4	5.93259	0.00695271	0.00118272	0.00576999	0.0112435	0.00160831	0.00183459	0.00166488	0.010929	medium heterogeneity
Q8NEG4	Protein FAM83F	FAM83F	FAM83F	500	2	4.9706	0.00324557	0.00219147	0.00105409	0.00099308	0.00060453	0.00258583	0.00109986	0.147541	medium heterogeneity
A6ND36	Protein FAM83G (Protein associated with SMAD1)	FAM83G	FAM83G PAWS1	823	2	5.63119	0.00572798	0.00358662	0.00214136	0.00543695	0.000283864	-0.00217296	-0.000330342	0.0655738	medium heterogeneity
Q6ZRV2	Protein FAM83H	FAM83H	FAM83H	1179	2	5.69408	0.0123083	0.00807926	0.00422908	0.0095945	-0.00057095	0.00253294	0.000205022	0.0245902	medium heterogeneity
Q658Y4	Protein FAM91A1	FAM91A1	FAM91A1	838	2	5.56448	0.0043199	0.000317472	0.00400243	0.00468854	0.0028868	0.00529099	0.00348784	0.0300546	medium heterogeneity
Q8NCA5	Protein FAM98A	FAM98A	FAM98A	519	2	5.22082	0.00353652	0.00181189	0.00172464	-0.000713025	-8.78e-05	0.0144751	0.00355289	0.0874317	medium heterogeneity
Q52LJ0	Protein FAM98B	FAM98B	FAM98B	330	2	5.18354	0.00272735	0.00172338	0.00100398	0.00248909	-0.000293603	0.000441361	-0.000109862	0.161202	medium heterogeneity
Q9NVI1	Fanconi anemia group I protein (Protein FACI)	FANCI	FANCI KIAA1794	1328	2	5.18773	0.0111405	0.0014167	0.00972376	0.0052673	0.014736	0.00805637	0.0130661	0.00273224	variable in ADCA
Q12884	Prolyl endopeptidase FAP (EC 3.4.21.26) (170 kDa melanoma membrane-bound gelatinase) (Dipeptidyl peptidase FAP) (EC 3.4.14.5) (Fibroblast activation protein alpha) (FAPalpha) (Gelatine degradation protease FAP) (EC 3.4.21.-) (Integral membrane serine protease) (Post-proline cleaving enzyme) (Serine integral membrane protease) (SIMP) (Surface-expressed protease) (Seprase) [Cleaved into: Antiplasmi…	FAP	FAP	760	2	5.56484	0.00598902	0.000433639	0.00555538	0.00483103	0.00529295	0.00851572	0.00609864	0.010929	medium heterogeneity
Q9Y4F1	FERM, ARHGEF and pleckstrin domain-containing protein 1 (Chondrocyte-derived ezrin-like protein) (FERM, RhoGEF and pleckstrin domain-containing protein 1) (Pleckstrin homology domain-containing family C member 2) (PH domain-containing family C member 2)	FARP1	FARP1 CDEP PLEKHC2	1045	6	5.25866	0.00260511	0.00119702	0.00140808	0.00190746	0.00120455	0.000520549	0.00103355	0.114754	medium heterogeneity
O94887	FERM, ARHGEF and pleckstrin domain-containing protein 2 (FERM domain-including RhoGEF) (FIR) (FERM, RhoGEF and pleckstrin domain-containing protein 2) (Pleckstrin homology domain-containing family C member 3) (PH domain-containing family C member 3)	FARP2	FARP2 KIAA0793 PLEKHC3	1054	2	5.69948	0.00455283	0.000974695	0.00357813	0.00633136	0.00183699	0.000541895	0.00151322	0.0355191	medium heterogeneity
Q9Y285	Phenylalanine--tRNA ligase alpha subunit (EC 6.1.1.20) (CML33) (Phenylalanyl-tRNA synthetase alpha subunit) (PheRS)	FARSA	FARSA FARS FARSL FARSLA	508	6	4.78836	0.00448882	0.00264936	0.00183946	0.00258964	0.00136245	0.00101996	0.00127682	0.0819672	medium heterogeneity
Q9NSD9	Phenylalanine--tRNA ligase beta subunit (EC 6.1.1.20) (Phenylalanyl-tRNA synthetase beta subunit) (PheRS)	FARSB	FARSB FARSLB FRSB HSPC173	589	6	5.00573	0.0107525	0.000495675	0.0102568	0.00770825	0.00823391	0.0239714	0.0121683	0.00273224	variable in BPH and ADCA
P49327	Fatty acid synthase (EC 2.3.1.85) [Includes: [Acyl-carrier-protein] S-acetyltransferase (EC 2.3.1.38); [Acyl-carrier-protein] S-malonyltransferase (EC 2.3.1.39); 3-oxoacyl-[acyl-carrier-protein] synthase (EC 2.3.1.41); 3-oxoacyl-[acyl-carrier-protein] reductase (EC 1.1.1.100); 3-hydroxyacyl-[acyl-carrier-protein] dehydratase (EC 4.2.1.59); Enoyl-[acyl-carrier-protein] reductase (EC 1.3.1.39); Ole…	FASN	FASN FAS	2511	64	5.31501	0.00506445	0.000247642	0.00481681	0.000378549	0.00324425	0.0228493	0.0081455	0.0191257	medium heterogeneity
Q9NYY8	FAST kinase domain-containing protein 2, mitochondrial	FASTKD2	FASTKD2 KIAA0971	710	2	5.12658	0.0151588	0.0147339	0.000424926	0.00235035	-0.00304076	0.00504573	-0.00101914	0.275956	medium heterogeneity
P22087	rRNA 2'-O-methyltransferase fibrillarin (EC 2.1.1.-) (34 kDa nucleolar scleroderma antigen) (Histone-glutamine methyltransferase)	FBL	FBL FIB1 FLRN	321	6	5.09443	0.00369749	0.000991803	0.00270569	0.00323791	0.00149061	0.00475426	0.00230652	0.0437158	medium heterogeneity
Q8WUP2	Filamin-binding LIM protein 1 (FBLP-1) (Migfilin) (Mitogen-inducible 2-interacting protein) (MIG2-interacting protein)	FBLIM1	FBLIM1 FBLP1	373	2	5.35224	0.00310715	0.00112227	0.00198488	0.00151297	0.00240405	0.00214308	0.00233881	0.0710383	medium heterogeneity
P23142	Fibulin-1 (FIBL-1)	FBLN1	FBLN1 PP213	703	7	5.30941	0.00512085	0.000203168	0.00491769	0.00497879	0.00342609	0.00920919	0.00487186	0.0191257	medium heterogeneity
P98095	Fibulin-2 (FIBL-2)	FBLN2	FBLN2	1184	8	5.22792	0.00685706	0.00115351	0.00570355	0.00557133	0.00651507	0.00366565	0.00580271	0.010929	medium heterogeneity
Q9UBX5	Fibulin-5 (FIBL-5) (Developmental arteries and neural crest EGF-like protein) (Dance) (Urine p50 protein) (UP50)	FBLN5	FBLN5 DANCE UNQ184/PRO210	448	5	5.31887	0.00977647	0.000740686	0.00903579	0.0139266	0.00638874	0.00230453	0.00536769	0.00273224	variable in BPH
P35555	Fibrillin-1 [Cleaved into: Asprosin]	FBN1	FBN1 FBN	2871	2	4.99027	0.00709768	0.00353567	0.003562	0.00140313	0.00479238	0.00634748	0.00518115	0.0355191	medium heterogeneity
Q96CD0	F-box/LRR-repeat protein 8 (F-box and leucine-rich repeat protein 8) (F-box protein FBL8)	FBXL8	FBXL8 FBL8	374	2	4.4281	0.016019	0.0157953	0.000223713	-0.0016669	-0.00031922	0.00752436	0.00164167	0.374317	stable in BPH and ADCA
Q8NEZ5	F-box only protein 22 (F-box protein FBX22p44)	FBXO22	FBXO22 FBX22	403	2	5.65766	0.00385106	0.00263245	0.0012186	-0.000468093	0.00180036	0.00453344	0.00248363	0.128415	medium heterogeneity
Q9Y3I1	F-box only protein 7	FBXO7	FBXO7 FBX7	522	2	5.35936	0.00618488	0.00201146	0.00417342	0.00706092	0.000801444	0.00562686	0.0020078	0.0245902	medium heterogeneity
Q9Y6R7	IgGFc-binding protein (Fcgamma-binding protein antigen) (FcgammaBP)	FCGBP	FCGBP	5405	6	5.56784	0.00719597	0.000182599	0.00701337	0.0118072	0.00252457	0.0060983	0.003418	0.00546448	variable in BPH
Q15485	Ficolin-2 (37 kDa elastin-binding protein) (Collagen/fibrinogen domain-containing protein 2) (EBP-37) (Ficolin-B) (Ficolin-beta) (Hucolin) (L-ficolin) (Serum lectin p35)	FCN2	FCN2 FCNL	313	2	5.05962	0.00617007	0.00250799	0.00366208	0.0036981	0.00258938	0.00677215	0.00363507	0.0327869	medium heterogeneity
P37268	Squalene synthase (SQS) (SS) (EC 2.5.1.21) (FPP:FPP farnesyltransferase) (Farnesyl-diphosphate farnesyltransferase)	FDFT1	FDFT1	417	2	5.57726	0.00441284	0.00212213	0.0022907	0.00179724	0.00297511	0.00171788	0.0026608	0.0601093	medium heterogeneity
P14324	Farnesyl pyrophosphate synthase (FPP synthase) (FPS) (EC 2.5.1.10) ((2E,6E)-farnesyl diphosphate synthase) (Dimethylallyltranstransferase) (EC 2.5.1.1) (Farnesyl diphosphate synthase) (Geranyltranstransferase)	FDPS	FDPS FPS KIAA1293	419	3	4.92501	0.00614027	0.00318768	0.00295259	0.00317085	0.00329023	0.0012849	0.0027889	0.0409836	medium heterogeneity
P22570	NADPH:adrenodoxin oxidoreductase, mitochondrial (AR) (Adrenodoxin reductase) (EC 1.18.1.6) (Ferredoxin--NADP(+) reductase) (Ferredoxin reductase)	FDXR	FDXR ADXR	491	8	5.5766	0.00283918	0.000553294	0.00228589	0.00275083	0.00210323	0.00143904	0.00193718	0.0601093	medium heterogeneity
P22830	Ferrochelatase, mitochondrial (EC 4.99.1.1) (Heme synthase) (Protoheme ferro-lyase)	FECH	FECH	423	4	5.4499	0.00420987	0.000308677	0.00390119	0.00701148	0.000954302	0.00341099	0.00156847	0.0300546	medium heterogeneity
P39748	Flap endonuclease 1 (FEN-1) (EC 3.1.-.-) (DNase IV) (Flap structure-specific endonuclease 1) (Maturation factor 1) (MF1) (hFEN-1)	FEN1	FEN1 RAD2	380	4	6.57115	0.0162664	0.00101394	0.0152525	0.033069	0.00229604	0.000672017	0.00189003	0.00273224	variable in BPH
Q96AC1	Fermitin family homolog 2 (Kindlin-2) (Mitogen-inducible gene 2 protein) (MIG-2) (Pleckstrin homology domain-containing family C member 1) (PH domain-containing family C member 1)	FERMT2	FERMT2 KIND2 MIG2 PLEKHC1	680	6	5.70333	0.0063432	0.000315663	0.00602754	0.00852947	0.00398571	0.00464722	0.00415109	0.00819672	variable in BPH
Q86UX7	Fermitin family homolog 3 (Kindlin-3) (MIG2-like protein) (Unc-112-related protein 2)	FERMT3	FERMT3 KIND3 MIG2B URP2	667	4	5.20139	0.00182751	0.000463203	0.00136431	0.00140279	0.00132956	0.00135313	0.00133545	0.114754	medium heterogeneity
P02671	Fibrinogen alpha chain [Cleaved into: Fibrinopeptide A; Fibrinogen alpha chain]	FGA	FGA	866	7	5.53657	0.00402683	0.00117923	0.0028476	0.00574176	0.000971562	-0.000206754	0.000676983	0.0409836	medium heterogeneity
P02675	Fibrinogen beta chain [Cleaved into: Fibrinopeptide B; Fibrinogen beta chain]	FGB	FGB	491	13	5.33154	0.0169066	0.0010393	0.0158673	0.0181701	0.0153596	0.0104819	0.0141402	0.00273224	variable in BPH and ADCA
Q7Z6J4	FYVE, RhoGEF and PH domain-containing protein 2 (Zinc finger FYVE domain-containing protein 4)	FGD2	FGD2 ZFYVE4	655	2	5.77397	0.00199756	0.000314004	0.00168356	0.00196243	0.00104855	0.00275196	0.00147441	0.0901639	medium heterogeneity
P02679	Fibrinogen gamma chain	FGG	FGG PRO2061	453	8	5.35594	0.0161449	0.00107715	0.0150677	0.0245921	0.00845708	0.00632667	0.00792448	0.00273224	variable in BPH
P07954	Fumarate hydratase, mitochondrial (Fumarase) (EC 4.2.1.2)	FH	FH	510	14	5.14217	0.00168124	0.000749398	0.000931846	0.00163437	0.000482892	0.000171147	0.000404956	0.166667	medium heterogeneity
P49789	Bis(5'-adenosyl)-triphosphatase (EC 3.6.1.29) (AP3A hydrolase) (AP3Aase) (Diadenosine 5',5'''-P1,P3-triphosphate hydrolase) (Dinucleosidetriphosphatase) (Fragile histidine triad protein)	FHIT	FHIT	147	2	5.68503	0.00129682	0.000821133	0.00047569	7.38e-05	0.000895207	0.000422923	0.000777136	0.248634	medium heterogeneity
Q13642	Four and a half LIM domains protein 1 (FHL-1) (Skeletal muscle LIM-protein 1) (SLIM) (SLIM-1)	FHL1	FHL1 SLIM1	323	11	5.54542	0.00891277	0.000908013	0.00800476	0.0116812	0.00210786	0.0146661	0.00524741	0.00273224	variable in BPH
Q14192	Four and a half LIM domains protein 2 (FHL-2) (LIM domain protein DRAL) (Skeletal muscle LIM-protein 3) (SLIM-3)	FHL2	FHL2 DRAL SLIM3	279	2	5.19241	0.00503333	0.00264315	0.00239019	0.00326882	0.00112783	0.00354136	0.00173121	0.057377	medium heterogeneity
Q9Y613	FH1/FH2 domain-containing protein 1 (Formin homolog overexpressed in spleen 1) (FHOS) (Formin homology 2 domain-containing protein 1)	FHOD1	FHOD1 FHOS FHOS1	1164	3	5.24867	0.00313941	0.00144187	0.00169755	0.00244082	0.00167467	-0.000463628	0.00114009	0.0874317	medium heterogeneity
Q6UN15	Pre-mRNA 3'-end-processing factor FIP1 (hFip1) (FIP1-like 1 protein) (Factor interacting with PAP) (Rearranged in hypereosinophilia)	FIP1L1	FIP1L1 FIP1 RHE	594	3	5.36677	0.00234179	0.00186424	0.00047755	0.00111674	0.000218405	-0.000662599	-1.85e-06	0.248634	medium heterogeneity
Q9Y3D6	Mitochondrial fission 1 protein (FIS1 homolog) (hFis1) (Tetratricopeptide repeat protein 11) (TPR repeat protein 11)	FIS1	FIS1 TTC11 CGI-135	152	2	5.05238	0.0062105	0.00184224	0.00436826	0.00737494	0.000209061	0.00782585	0.00211326	0.0191257	medium heterogeneity
Q96AY3	Peptidyl-prolyl cis-trans isomerase FKBP10 (PPIase FKBP10) (EC 5.2.1.8) (65 kDa FK506-binding protein) (65 kDa FKBP) (FKBP-65) (FK506-binding protein 10) (FKBP-10) (Immunophilin FKBP65) (Rotamase)	FKBP10	FKBP10 FKBP65 PSEC0056	582	4	5.53338	0.00662245	0.000403251	0.0062192	0.00920173	0.00251869	0.00837309	0.00398229	0.00819672	variable in BPH
Q5T1M5	FK506-binding protein 15 (FKBP-15) (133 kDa FK506-binding protein) (133 kDa FKBP) (FKBP-133) (WASP- and FKBP-like protein) (WAFL)	FKBP15	FKBP15 KIAA0674	1219	2	5.7002	0.00405799	0.00139918	0.00265881	0.003029	0.00101415	0.00648223	0.00238117	0.0491803	medium heterogeneity
P62942	Peptidyl-prolyl cis-trans isomerase FKBP1A (PPIase FKBP1A) (EC 5.2.1.8) (12 kDa FK506-binding protein) (12 kDa FKBP) (FKBP-12) (Calstabin-1) (FK506-binding protein 1A) (FKBP-1A) (Immunophilin FKBP12) (Rotamase)	FKBP1A	FKBP1A FKBP1 FKBP12	108	6	5.46981	0.00377357	0.000740325	0.00303325	0.0046349	0.00207688	0.00109742	0.00183201	0.0409836	medium heterogeneity
P26885	Peptidyl-prolyl cis-trans isomerase FKBP2 (PPIase FKBP2) (EC 5.2.1.8) (13 kDa FK506-binding protein) (13 kDa FKBP) (FKBP-13) (FK506-binding protein 2) (FKBP-2) (Immunophilin FKBP13) (Rotamase)	FKBP2	FKBP2 FKBP13	142	3	5.23376	0.00176851	0.000432173	0.00133634	0.00104979	0.00186409	0.000612725	0.00155125	0.117486	medium heterogeneity
Q00688	Peptidyl-prolyl cis-trans isomerase FKBP3 (PPIase FKBP3) (EC 5.2.1.8) (25 kDa FK506-binding protein) (25 kDa FKBP) (FKBP-25) (FK506-binding protein 3) (FKBP-3) (Immunophilin FKBP25) (Rapamycin-selective 25 kDa immunophilin) (Rotamase)	FKBP3	FKBP3 FKBP25	224	5	5.20043	0.00393971	0.000485442	0.00345427	0.00126697	0.00461192	0.0065432	0.00509474	0.0409836	medium heterogeneity
Q02790	Peptidyl-prolyl cis-trans isomerase FKBP4 (PPIase FKBP4) (EC 5.2.1.8) (51 kDa FK506-binding protein) (FKBP51) (52 kDa FK506-binding protein) (52 kDa FKBP) (FKBP-52) (59 kDa immunophilin) (p59) (FK506-binding protein 4) (FKBP-4) (FKBP59) (HSP-binding immunophilin) (HBI) (Immunophilin FKBP52) (Rotamase) [Cleaved into: Peptidyl-prolyl cis-trans isomerase FKBP4, N-terminally processed]	FKBP4	FKBP4 FKBP52	459	16	5.39009	0.00184309	0.000256081	0.00158701	0.0013794	0.00112862	0.00358502	0.00174272	0.0928962	medium heterogeneity
Q13451	Peptidyl-prolyl cis-trans isomerase FKBP5 (PPIase FKBP5) (EC 5.2.1.8) (51 kDa FK506-binding protein) (51 kDa FKBP) (FKBP-51) (54 kDa progesterone receptor-associated immunophilin) (Androgen-regulated protein 6) (FF1 antigen) (FK506-binding protein 5) (FKBP-5) (FKBP54) (p54) (HSP90-binding immunophilin) (Rotamase)	FKBP5	FKBP5 AIG6 FKBP51	457	4	5.17119	0.00334022	0.000705794	0.00263442	0.00263519	0.00143323	0.00623571	0.00263385	0.0491803	medium heterogeneity
Q8NFF5	FAD synthase (EC 2.7.7.2) (FAD pyrophosphorylase) (FMN adenylyltransferase) (Flavin adenine dinucleotide synthase) [Includes: Molybdenum cofactor biosynthesis protein-like region; FAD synthase region]	FLAD1	FLAD1 PP591	587	2	5.05511	0.00640842	0.0059614	0.000447024	-0.00121294	0.00140557	0.00255127	0.00169199	0.262295	medium heterogeneity
Q13045	Protein flightless-1 homolog	FLII	FLII FLIL	1269	3	5.78879	0.00181428	0.00094225	0.000872033	0.00103309	0.000402034	0.00179887	0.000751243	0.177596	medium heterogeneity
P21333	Filamin-A (FLN-A) (Actin-binding protein 280) (ABP-280) (Alpha-filamin) (Endothelial actin-binding protein) (Filamin-1) (Non-muscle filamin)	FLNA	FLNA FLN FLN1	2647	110	5.65049	0.0103134	0.00020928	0.0101041	0.00925661	0.00973862	0.013743	0.0107397	0.00273224	variable in BPH and ADCA
O75369	Filamin-B (FLN-B) (ABP-278) (ABP-280 homolog) (Actin-binding-like protein) (Beta-filamin) (Filamin homolog 1) (Fh1) (Filamin-3) (Thyroid autoantigen) (Truncated actin-binding protein) (Truncated ABP)	FLNB	FLNB FLN1L FLN3 TABP TAP	2602	48	5.34379	0.00424357	0.000218069	0.0040255	0.00354548	0.00304476	0.00840782	0.00438553	0.0300546	medium heterogeneity
Q14315	Filamin-C (FLN-C) (FLNc) (ABP-280-like protein) (ABP-L) (Actin-binding-like protein) (Filamin-2) (Gamma-filamin)	FLNC	FLNC ABPL FLN2	2725	23	5.37223	0.00555719	0.00060609	0.0049511	0.0068054	0.00293916	0.00542398	0.00356036	0.0191257	medium heterogeneity
O75955	Flotillin-1	FLOT1	FLOT1	427	6	5.20111	0.00197178	0.000535963	0.00143581	0.00162718	0.00165547	0.000202758	0.00129229	0.112022	medium heterogeneity
Q14254	Flotillin-2 (Epidermal surface antigen) (ESA) (Membrane component chromosome 17 surface marker 1)	FLOT2	FLOT2 ESA1 M17S1	428	8	5.16613	0.00285855	0.000668482	0.00219007	0.00276774	0.000906854	0.00430671	0.00175682	0.0601093	medium heterogeneity
O95466	Formin-like protein 1 (CLL-associated antigen KW-13) (Leukocyte formin)	FMNL1	FMNL1 C17orf1 C17orf1B FMNL FRL1	1100	2	5.82875	0.00708782	0.00160309	0.00548473	0.0071199	0.00388519	0.00537786	0.00425836	0.010929	medium heterogeneity
Q96PY5	Formin-like protein 2 (Formin homology 2 domain-containing protein 2)	FMNL2	FMNL2 FHOD2 KIAA1902	1086	2	5.61239	0.00427139	0.00170761	0.00256378	0.00208498	0.00144421	0.00735891	0.00292289	0.0519126	medium heterogeneity
Q06828	Fibromodulin (FM) (Collagen-binding 59 kDa protein) (Keratan sulfate proteoglycan fibromodulin) (KSPG fibromodulin)	FMOD	FMOD FM SLRR2E	376	4	5.38883	0.00507088	0.00389801	0.00117287	0.000380841	0.000735421	0.00486131	0.00176689	0.13388	medium heterogeneity
P02751	Fibronectin (FN) (Cold-insoluble globulin) (CIG) [Cleaved into: Anastellin; Ugl-Y1; Ugl-Y2; Ugl-Y3]	FN1	FN1 FN	2386	14	5.12502	0.0030115	0.00035391	0.0026576	0.000857934	0.00320556	0.00641268	0.00400734	0.0491803	medium heterogeneity
Q9H479	Fructosamine-3-kinase (EC 2.7.1.-)	FN3K	FN3K	309	2	4.46709	0.0125956	0.00932346	0.00327218	0.0028745	0.00113233	0.0108847	0.00357044	0.0409836	medium heterogeneity
Q9HA64	Ketosamine-3-kinase (EC 2.7.1.-) (Fructosamine-3-kinase-related protein) (FN3K-RP) (FN3K-related protein)	FN3KRP	FN3KRP	309	2	5.48158	0.0117412	0.00354225	0.00819894	0.00893837	0.00972176	0.00141221	0.00764437	0.00273224	variable in BPH and ADCA
Q5T0N5	Formin-binding protein 1-like (Transducer of Cdc42-dependent actin assembly protein 1) (Toca-1)	FNBP1L	FNBP1L C1orf39 TOCA1	605	2	6.13426	0.0055614	0.000745119	0.00481628	0.00756641	0.00259176	0.00323946	0.00275369	0.0191257	medium heterogeneity
P49354	Protein farnesyltransferase/geranylgeranyltransferase type-1 subunit alpha (EC 2.5.1.58) (EC 2.5.1.59) (CAAX farnesyltransferase subunit alpha) (FTase-alpha) (Ras proteins prenyltransferase subunit alpha) (Type I protein geranyl-geranyltransferase subunit alpha) (GGTase-I-alpha)	FNTA	FNTA	379	3	5.02172	0.00534257	0.00245133	0.00289124	0.0035242	0.00160809	0.0048418	0.00241652	0.0409836	medium heterogeneity
Q5VW36	Focadhesin	FOCAD	FOCAD KIAA1797	1801	2	5.40332	0.0119165	0.00255483	0.00936166	0.0063491	0.0142089	0.00385764	0.0116211	0.00273224	variable in BPH and ADCA
Q04609	Glutamate carboxypeptidase 2 (EC 3.4.17.21) (Cell growth-inhibiting gene 27 protein) (Folate hydrolase 1) (Folylpoly-gamma-glutamate carboxypeptidase) (FGCP) (Glutamate carboxypeptidase II) (GCPII) (Membrane glutamate carboxypeptidase) (mGCP) (N-acetylated-alpha-linked acidic dipeptidase I) (NAALADase I) (Prostate-specific membrane antigen) (PSM) (PSMA) (Pteroylpoly-gamma-glutamate carboxypeptida…	FOLH1	FOLH1 FOLH NAALAD1 PSM PSMA GIG27	750	7	5.00593	0.00456349	0.00138446	0.00317903	0.00165338	0.00307632	0.0080641	0.00432327	0.0409836	medium heterogeneity
P55317	Hepatocyte nuclear factor 3-alpha (HNF-3-alpha) (HNF-3A) (Forkhead box protein A1) (Transcription factor 3A) (TCF-3A)	FOXA1	FOXA1 HNF3A TCF3A	472	2	5.3592	0.00352291	0.000994154	0.00252875	0.0015635	0.00376514	0.00171536	0.00325269	0.0546448	medium heterogeneity
P85037	Forkhead box protein K1 (Myocyte nuclear factor) (MNF)	FOXK1	FOXK1 MNF	733	3	5.43348	0.00233953	0.000506954	0.00183258	0.00245429	0.00146536	0.00106911	0.0013663	0.0819672	medium heterogeneity
O43524	Forkhead box protein O3 (AF6q21 protein) (Forkhead in rhabdomyosarcoma-like 1)	FOXO3	FOXO3 FKHRL1 FOXO3A	673	2	5.14686	0.0302777	0.00286527	0.0274124	0.038373	0.0120416	0.0406431	0.019192	0.00273224	variable in BPH and ADCA
O14772	Fucose-1-phosphate guanylyltransferase (EC 2.7.7.30) (GDP-L-fucose diphosphorylase) (GDP-L-fucose pyrophosphorylase)	FPGT	FPGT GFPP	594	5	5.6601	0.0022945	0.000707186	0.00158731	0.000445926	0.00178567	0.00441642	0.00244335	0.0928962	medium heterogeneity
Q5SZK8	FRAS1-related extracellular matrix protein 2 (ECM3 homolog)	FREM2	FREM2	3169	3	5.67882	0.00401922	0.000765326	0.00325389	0.0031209	0.00290406	0.00470239	0.00335364	0.0409836	medium heterogeneity
O94915	Protein furry homolog-like (ALL1-fused gene from chromosome 4p12 protein)	FRYL	FRYL AF4P12 KIAA0826	3013	10	3.99986	0.00260701	0.000775979	0.00183103	0.000439871	0.00293998	0.00267768	0.00287441	0.0819672	medium heterogeneity
Q16658	Fascin (55 kDa actin-bundling protein) (Singed-like protein) (p55)	FSCN1	FSCN1 FAN1 HSN SNL	493	4	5.55821	0.0012672	0.000452466	0.000814728	0.00070256	0.000440017	0.00227537	0.000898855	0.185792	medium heterogeneity
Q12841	Follistatin-related protein 1 (Follistatin-like protein 1)	FSTL1	FSTL1 FRP	308	2	5.39269	0.00649504	0.0017259	0.00476914	0.00152015	0.00372066	0.0176616	0.00720589	0.0191257	medium heterogeneity
P02794	Ferritin heavy chain (Ferritin H subunit) (EC 1.16.3.1) (Cell proliferation-inducing gene 15 protein) [Cleaved into: Ferritin heavy chain, N-terminally processed]	FTH1	FTH1 FTH FTHL6 OK/SW-cl.84 PIG15	183	8	5.21524	0.00128976	0.000462808	0.000826956	0.000508465	0.00121079	0.000630937	0.00106582	0.18306	medium heterogeneity
P02792	Ferritin light chain (Ferritin L subunit)	FTL	FTL	175	8	5.33565	0.00966391	0.00134423	0.00831969	0.00211632	0.0171253	0.000512886	0.0129722	0.00273224	variable in ADCA
Q9C0B1	Alpha-ketoglutarate-dependent dioxygenase FTO (EC 1.14.11.-) (Fat mass and obesity-associated protein)	FTO	FTO KIAA1752	505	2	5.1537	0.00262385	0.00191018	0.000713669	0.000655925	9.6e-06	0.00299912	0.000756977	0.199454	medium heterogeneity
Q96AE4	Far upstream element-binding protein 1 (FBP) (FUSE-binding protein 1) (DNA helicase V) (hDH V)	FUBP1	FUBP1	644	8	5.39071	0.00228761	0.00068172	0.00160589	0.0017178	0.000751801	0.00383242	0.00152196	0.0901639	medium heterogeneity
Q96I24	Far upstream element-binding protein 3 (FUSE-binding protein 3)	FUBP3	FUBP3 FBP3	572	4	5.8456	0.00469697	0.000926706	0.00377026	0.00343889	0.00396308	0.0041859	0.00401879	0.0300546	medium heterogeneity
P04066	Tissue alpha-L-fucosidase (EC 3.2.1.51) (Alpha-L-fucosidase I) (Alpha-L-fucoside fucohydrolase 1) (Alpha-L-fucosidase 1)	FUCA1	FUCA1 Nbla10230	466	10	4.98966	0.0040198	0.000902749	0.00311705	0.00109259	0.0017393	0.0133237	0.00463539	0.0409836	medium heterogeneity
Q9BTY2	Plasma alpha-L-fucosidase (EC 3.2.1.51) (Alpha-L-fucoside fucohydrolase 2) (Alpha-L-fucosidase 2)	FUCA2	FUCA2 PSEC0151 UNQ227/PRO260	467	4	4.79214	0.0065865	0.00182954	0.00475696	0.00426363	0.00514544	0.00507149	0.00512695	0.0191257	medium heterogeneity
Q8N0W3	L-fucose kinase (Fucokinase) (EC 2.7.1.52)	FUK	FUK	1084	2	5.35007	0.0157284	0.0150089	0.000719444	0.00754591	-0.00223502	-0.0108966	-0.00440041	0.196721	medium heterogeneity
P35637	RNA-binding protein FUS (75 kDa DNA-pairing protein) (Oncogene FUS) (Oncogene TLS) (POMp75) (Translocated in liposarcoma protein)	FUS	FUS TLS	526	3	5.07112	0.00332732	0.000842778	0.00248454	0.00399446	0.00132035	0.00144736	0.0013521	0.0546448	medium heterogeneity
Q16595	Frataxin, mitochondrial (EC 1.16.3.1) (Friedreich ataxia protein) (Fxn) [Cleaved into: Frataxin intermediate form (i-FXN); Frataxin(56-210) (m56-FXN); Frataxin(78-210) (d-FXN) (m78-FXN); Frataxin mature form (Frataxin(81-210)) (m81-FXN)]	FXN	FXN FRDA X25	210	2	5.21796	0.00800405	0.00658988	0.00141417	0.00227279	4.42e-05	0.00294814	0.0007702	0.114754	medium heterogeneity
P51114	Fragile X mental retardation syndrome-related protein 1 (hFXR1p)	FXR1	FXR1	621	3	5.95605	0.00494782	0.00170856	0.00323926	0.00413172	0.00195936	0.00440155	0.00256991	0.0409836	medium heterogeneity
Q9BQS8	FYVE and coiled-coil domain-containing protein 1 (Zinc finger FYVE domain-containing protein 7)	FYCO1	FYCO1 ZFYVE7	1478	3	5.37426	0.00190172	0.00103344	0.000868284	0.00150392	0.000468874	0.000159599	0.000391555	0.177596	medium heterogeneity
Q13283	Ras GTPase-activating protein-binding protein 1 (G3BP-1) (EC 3.6.4.12) (EC 3.6.4.13) (ATP-dependent DNA helicase VIII) (hDH VIII) (GAP SH3 domain-binding protein 1)	G3BP1	G3BP1 G3BP	466	8	5.27948	0.00186641	0.000426254	0.00144016	0.00149949	0.00133923	0.00156496	0.00139566	0.112022	medium heterogeneity
Q9UN86	Ras GTPase-activating protein-binding protein 2 (G3BP-2) (GAP SH3 domain-binding protein 2)	G3BP2	G3BP2 KIAA0660	482	4	4.84844	0.00336125	0.00185735	0.0015039	0.00246939	0.000441844	0.0017936	0.000779783	0.103825	medium heterogeneity
P11413	Glucose-6-phosphate 1-dehydrogenase (G6PD) (EC 1.1.1.49)	G6PD	G6PD	515	5	4.84666	0.00480219	0.00112729	0.0036749	0.0044904	0.00257509	0.00452784	0.00306328	0.0327869	medium heterogeneity
P10253	Lysosomal alpha-glucosidase (EC 3.2.1.20) (Acid maltase) (Aglucosidase alfa) [Cleaved into: 76 kDa lysosomal alpha-glucosidase; 70 kDa lysosomal alpha-glucosidase]	GAA	GAA	952	14	5.17019	0.00193906	0.000266523	0.00167254	0.000812346	0.00107862	0.00603486	0.00231768	0.0901639	medium heterogeneity
O14976	Cyclin-G-associated kinase (EC 2.7.11.1)	GAK	GAK	1311	3	5.48546	0.000307391	0.00019691	0.000110481	9.31e-05	6.21e-05	0.000307779	0.000123528	0.442623	stable in BPH and ADCA
Q14376	UDP-glucose 4-epimerase (EC 5.1.3.2) (Galactowaldenase) (UDP-N-acetylgalactosamine 4-epimerase) (UDP-GalNAc 4-epimerase) (UDP-N-acetylglucosamine 4-epimerase) (UDP-GlcNAc 4-epimerase) (EC 5.1.3.7) (UDP-galactose 4-epimerase)	GALE	GALE	348	3	4.66261	0.00906081	0.00169617	0.00736464	0.0127624	0.0034005	0.00306373	0.00331631	0.00273224	variable in BPH
P51570	Galactokinase (EC 2.7.1.6) (Galactose kinase)	GALK1	GALK1 GALK	392	3	5.26822	0.00278326	0.000519335	0.00226392	0.00246642	0.00179189	0.00307252	0.00211205	0.0601093	medium heterogeneity
Q96C23	Aldose 1-epimerase (EC 5.1.3.3) (Galactose mutarotase)	GALM	GALM BLOCK25	342	3	5.14403	0.00297485	0.00224184	0.000733004	0.0029095	-0.000936415	-0.000788232	-0.000899369	0.196721	medium heterogeneity
Q10471	Polypeptide N-acetylgalactosaminyltransferase 2 (EC 2.4.1.41) (Polypeptide GalNAc transferase 2) (GalNAc-T2) (pp-GaNTase 2) (Protein-UDP acetylgalactosaminyltransferase 2) (UDP-GalNAc:polypeptide N-acetylgalactosaminyltransferase 2) [Cleaved into: Polypeptide N-acetylgalactosaminyltransferase 2 soluble form]	GALNT2	GALNT2	571	3	5.67384	0.00156269	0.000289155	0.00127354	-3.14e-05	0.00194526	0.00317328	0.00225227	0.128415	medium heterogeneity
Q14435	Polypeptide N-acetylgalactosaminyltransferase 3 (EC 2.4.1.41) (Polypeptide GalNAc transferase 3) (GalNAc-T3) (pp-GaNTase 3) (Protein-UDP acetylgalactosaminyltransferase 3) (UDP-GalNAc:polypeptide N-acetylgalactosaminyltransferase 3)	GALNT3	GALNT3	633	3	5.5504	0.00519456	0.000404103	0.00479046	0.0083355	0.00137328	0.00440684	0.00213167	0.0191257	medium heterogeneity
Q8N4A0	Polypeptide N-acetylgalactosaminyltransferase 4 (EC 2.4.1.41) (Polypeptide GalNAc transferase 4) (GalNAc-T4) (pp-GaNTase 4) (Protein-UDP acetylgalactosaminyltransferase 4) (UDP-GalNAc:polypeptide N-acetylgalactosaminyltransferase 4)	GALNT4	GALNT4	578	2	5.95798	0.0170645	0.0028261	0.0142384	0.0191917	0.0118387	0.00657749	0.0105234	0.00273224	variable in BPH and ADCA
Q7Z7M9	Polypeptide N-acetylgalactosaminyltransferase 5 (EC 2.4.1.41) (Polypeptide GalNAc transferase 5) (GalNAc-T5) (pp-GaNTase 5) (Protein-UDP acetylgalactosaminyltransferase 5) (UDP-GalNAc:polypeptide N-acetylgalactosaminyltransferase 5)	GALNT5	GALNT5	940	2	5.81524	0.00852657	0.00361118	0.00491539	0.00339843	0.00851892	-0.00134431	0.00605311	0.0191257	medium heterogeneity
Q86SF2	N-acetylgalactosaminyltransferase 7 (EC 2.4.1.-) (Polypeptide GalNAc transferase 7) (GalNAc-T7) (pp-GaNTase 7) (Protein-UDP acetylgalactosaminyltransferase 7) (UDP-GalNAc:polypeptide N-acetylgalactosaminyltransferase 7)	GALNT7	GALNT7	657	3	5.04242	0.00453099	0.00273379	0.0017972	0.0030682	0.00153241	-0.00122142	0.000843953	0.0846995	medium heterogeneity
P07902	Galactose-1-phosphate uridylyltransferase (Gal-1-P uridylyltransferase) (EC 2.7.7.12) (UDP-glucose--hexose-1-phosphate uridylyltransferase)	GALT	GALT	379	2	5.48865	0.00200593	0.00043983	0.0015661	0.00191785	0.000929006	0.00242214	0.00130229	0.0983607	medium heterogeneity
Q14353	Guanidinoacetate N-methyltransferase (EC 2.1.1.2)	GAMT	GAMT	236	3	4.67252	0.00385489	0.00212323	0.00173166	0.00181771	0.000758298	0.00439361	0.00166713	0.0874317	medium heterogeneity
Q9H2C0	Gigaxonin (Kelch-like protein 16)	GAN	GAN GAN1 KLHL16	597	2	5.00247	0.00334395	0.0018069	0.00153705	0.000663975	0.00123245	0.00507008	0.00219185	0.101093	medium heterogeneity
Q14697	Neutral alpha-glucosidase AB (EC 3.2.1.84) (Alpha-glucosidase 2) (Glucosidase II subunit alpha)	GANAB	GANAB G2AN KIAA0088	944	14	5.34673	0.00122693	0.000879959	0.000346969	-0.000186699	0.000406212	0.00177024	0.00074722	0.308743	medium heterogeneity
P04406	Glyceraldehyde-3-phosphate dehydrogenase (GAPDH) (EC 1.2.1.12) (Peptidyl-cysteine S-nitrosylase GAPDH) (EC 2.6.99.-)	GAPDH	GAPDH GAPD CDABP0047 OK/SW-cl.12	335	20	6.02099	0.00152507	0.000248202	0.00127687	0.000440666	0.00247154	0.00020146	0.00190402	0.128415	medium heterogeneity
O14556	Glyceraldehyde-3-phosphate dehydrogenase, testis-specific (EC 1.2.1.12) (Spermatogenic cell-specific glyceraldehyde 3-phosphate dehydrogenase 2) (GAPDH-2) (Spermatogenic glyceraldehyde-3-phosphate dehydrogenase)	GAPDHS	GAPDHS GAPD2 GAPDH2 GAPDS HSD-35 HSD35	408	2	5.1891	0.0041889	0.00142214	0.00276676	0.00156072	0.00498629	-0.000273707	0.00367129	0.0409836	medium heterogeneity
Q14C86	GTPase-activating protein and VPS9 domain-containing protein 1 (GAPex-5) (Rab5-activating protein 6)	GAPVD1	GAPVD1 GAPEX5 KIAA1521 RAP6	1478	2	5.46573	0.00412874	0.00222632	0.00190241	0.000224769	0.00252626	0.00506383	0.00316065	0.0765027	medium heterogeneity
Q9NY12	H/ACA ribonucleoprotein complex subunit 1 (Nucleolar protein family A member 1) (snoRNP protein GAR1)	GAR1	GAR1 NOLA1	217	4	5.39592	0.00113678	0.00082348	0.000313297	0.00019346	0.00036191	0.000526968	0.000403175	0.327869	medium heterogeneity
P41250	Glycine--tRNA ligase (EC 3.6.1.17) (EC 6.1.1.14) (Diadenosine tetraphosphate synthetase) (AP-4-A synthetase) (Glycyl-tRNA synthetase) (GlyRS)	GARS	GARS	739	6	4.84615	0.00267848	0.00115002	0.00152846	0.000867782	0.00231041	0.00116462	0.00202396	0.101093	medium heterogeneity
P22102	Trifunctional purine biosynthetic protein adenosine-3 [Includes: Phosphoribosylamine--glycine ligase (EC 6.3.4.13) (Glycinamide ribonucleotide synthetase) (GARS) (Phosphoribosylglycinamide synthetase); Phosphoribosylformylglycinamidine cyclo-ligase (EC 6.3.3.1) (AIR synthase) (AIRS) (Phosphoribosyl-aminoimidazole synthetase); Phosphoribosylglycinamide formyltransferase (EC 2.1.2.2) (5'-phosphorib…	GART	GART PGFT PRGS	1010	5	5.14132	0.00406104	0.00212678	0.00193426	0.00454909	-0.000177711	0.000425712	-2.69e-05	0.0765027	medium heterogeneity
Q14393	Growth arrest-specific protein 6 (GAS-6) (AXL receptor tyrosine kinase ligand)	GAS6	GAS6 AXLLG	721	2	6.07145	0.0105774	0.000894144	0.00968326	0.0122418	0.00656198	0.0113715	0.00776436	0.00273224	variable in BPH and ADCA
O75879	Glutamyl-tRNA(Gln) amidotransferase subunit B, mitochondrial (Glu-AdT subunit B) (EC 6.3.5.-) (Cytochrome c oxidase assembly factor PET112 homolog)	GATB	GATB PET112 PET112L HSPC199	557	2	4.91295	0.0300362	0.0138787	0.0161575	0.00967749	0.0293321	-0.00392605	0.0210175	0.00273224	variable in ADCA
Q8NB37	Glutamine amidotransferase-like class 1 domain-containing protein 1 (Parkinson disease 7 domain-containing protein 1)	GATD1	GATD1 PDDC1	220	2	4.68377	0.00749567	0.00242611	0.00506955	0.00577655	0.00496457	0.00326348	0.0045393	0.0163934	medium heterogeneity
P50440	Glycine amidinotransferase, mitochondrial (EC 2.1.4.1) (L-arginine:glycine amidinotransferase) (Transamidinase)	GATM	GATM AGAT	423	2	6.04304	0.00708867	0.00170081	0.00538787	0.00324162	0.00893962	0.00117134	0.00699755	0.0136612	medium heterogeneity
P04062	Glucosylceramidase (EC 3.2.1.45) (Acid beta-glucosidase) (Alglucerase) (Beta-glucocerebrosidase) (Beta-GC) (D-glucosyl-N-acylsphingosine glucohydrolase) (Imiglucerase)	GBA	GBA GC GLUC	536	5	4.53784	0.00418358	0.00417444	9.13e-06	0.000595628	-0.00155559	0.00294381	-0.000430738	0.494536	stable in BPH and ADCA
Q04446	1,4-alpha-glucan-branching enzyme (EC 2.4.1.18) (Brancher enzyme) (Glycogen-branching enzyme)	GBE1	GBE1	702	3	5.65664	0.00381402	0.0012495	0.00256452	0.00314194	0.00254029	0.000904979	0.00213146	0.0519126	medium heterogeneity
Q92538	Golgi-specific brefeldin A-resistance guanine nucleotide exchange factor 1 (BFA-resistant GEF 1)	GBF1	GBF1 KIAA0248	1859	2	5.45894	0.00453706	0.00175383	0.00278322	0.00554174	3.6e-06	0.00284653	0.000714335	0.0409836	medium heterogeneity
P32455	Guanylate-binding protein 1 (EC 3.6.5.-) (GTP-binding protein 1) (GBP-1) (HuGBP-1) (Guanine nucleotide-binding protein 1) (Interferon-induced guanylate-binding protein 1)	GBP1	GBP1	592	2	5.81253	0.0019265	0.000488816	0.00143768	0.00255149	0.000269769	0.00159999	0.000602323	0.112022	medium heterogeneity
Q96PP8	Guanylate-binding protein 5 (EC 3.6.5.-) (GBP-TA antigen) (GTP-binding protein 5) (GBP-5) (Guanine nucleotide-binding protein 5)	GBP5	GBP5 UNQ2427/PRO4987	586	2	5.2796	0.0158729	0.00523298	0.0106399	0.0194241	0.00262304	0.00833788	0.00405175	0.00273224	variable in BPH
P02774	Vitamin D-binding protein (DBP) (VDB) (Gc protein-derived macrophage activating factor) (Gc-MAF) (GcMAF) (Gc-globulin) (Group-specific component) (Gc) (Vitamin D-binding protein-macrophage activating factor) (DBP-maf)	GC	GC	474	2	5.87784	0.0125021	0.00110573	0.0113964	0.00736564	0.0180087	0.00365156	0.0144194	0.00273224	variable in BPH and ADCA
P28676	Grancalcin	GCA	GCA GCL	217	3	5.00284	0.0112472	0.00116001	0.0100872	0.0203419	0.00240431	0.00237166	0.00239615	0.00273224	variable in BPH
Q92947	Glutaryl-CoA dehydrogenase, mitochondrial (GCD) (EC 1.3.8.6)	GCDH	GCDH	438	5	5.04504	0.00699207	0.00114624	0.00584582	0.00496506	0.00620893	0.00739879	0.00650639	0.00819672	variable in BPH and ADCA
P48506	Glutamate--cysteine ligase catalytic subunit (EC 6.3.2.2) (GCS heavy chain) (Gamma-ECS) (Gamma-glutamylcysteine synthetase)	GCLC	GCLC GLCL GLCLC	637	2	5.80822	0.0173433	0.0140762	0.0032671	-0.008008	0.00548322	0.030444	0.0117234	0.0409836	medium heterogeneity
P48507	Glutamate--cysteine ligase regulatory subunit (GCS light chain) (Gamma-ECS regulatory subunit) (Gamma-glutamylcysteine synthetase regulatory subunit) (Glutamate--cysteine ligase modifier subunit)	GCLM	GCLM GLCLR	274	2	5.76299	0.010681	0.000338753	0.0103422	0.00457347	0.0159696	0.0107661	0.0146688	0.00273224	variable in ADCA
Q92616	eIF-2-alpha kinase activator GCN1 (GCN1 eIF-2-alpha kinase activator homolog) (GCN1-like protein 1) (General control of amino-acid synthesis 1-like protein 1) (Translational activator GCN1) (HsGCN1)	GCN1	GCN1 GCN1L1 KIAA0219	2671	11	4.17173	0.00320188	0.00190194	0.00129994	0.00105846	0.000314796	0.00497981	0.00148105	0.128415	medium heterogeneity
Q99988	Growth/differentiation factor 15 (GDF-15) (Macrophage inhibitory cytokine 1) (MIC-1) (NSAID-activated gene 1 protein) (NAG-1) (NSAID-regulated gene 1 protein) (NRG-1) (Placental TGF-beta) (Placental bone morphogenetic protein) (Prostate differentiation factor)	GDF15	GDF15 MIC1 PDF PLAB PTGFB	308	9	5.52975	0.0343582	0.00317941	0.0311788	0.0113225	0.0055307	0.167692	0.046071	0.00273224	variable in ADCA
P31150	Rab GDP dissociation inhibitor alpha (Rab GDI alpha) (Guanosine diphosphate dissociation inhibitor 1) (GDI-1) (Oligophrenin-2) (Protein XAP-4)	GDI1	GDI1 GDIL OPHN2 RABGDIA XAP4	447	5	5.15637	0.000926497	0.000241579	0.000684917	0.00104526	0.000237089	0.00094737	0.00041466	0.204918	medium heterogeneity
P50395	Rab GDP dissociation inhibitor beta (Rab GDI beta) (Guanosine diphosphate dissociation inhibitor 2) (GDI-2)	GDI2	GDI2 RABGDIB	445	20	5.48818	0.00144387	0.00073562	0.000708246	0.000321446	0.000183453	0.00344302	0.000998346	0.199454	medium heterogeneity
P57678	Gem-associated protein 4 (Gemin-4) (Component of gems 4) (p97)	GEMIN4	GEMIN4	1058	2	5.13859	0.0061362	0.00189825	0.00423796	0.00519547	0.000714655	0.0119353	0.00351982	0.0245902	medium heterogeneity
Q8TEQ6	Gem-associated protein 5 (Gemin5)	GEMIN5	GEMIN5	1508	5	5.71993	0.00319752	0.000113726	0.00308379	0.00255805	0.00455368	0.000251378	0.0034781	0.0409836	medium heterogeneity
Q7L5D6	Golgi to ER traffic protein 4 homolog (Conserved edge-expressed protein) (Transmembrane domain recognition complex 35 kDa subunit) (TRC35)	GET4	GET4 C7orf20 CEE TRC35 CGI-20	327	2	5.66584	0.0113164	0.000714414	0.010602	0.0193435	0.00371803	0.00502955	0.00404591	0.00273224	variable in BPH
P14136	Glial fibrillary acidic protein (GFAP)	GFAP	GFAP	432	3	5.51398	0.00441211	0.00280614	0.00160596	0.0030076	0.000470148	0.000808471	0.000554729	0.0901639	medium heterogeneity
P55789	FAD-linked sulfhydryl oxidase ALR (EC 1.8.3.2) (Augmenter of liver regeneration) (hERV1) (Hepatopoietin)	GFER	GFER ALR HERV1 HPO	205	2	4.91815	0.00513602	0.00355119	0.00158483	0.00266945	0.000899429	0.000387165	0.000771363	0.0956284	medium heterogeneity
Q96RP9	Elongation factor G, mitochondrial (EF-Gmt) (Elongation factor G 1, mitochondrial) (mEF-G 1) (Elongation factor G1) (hEFG1)	GFM1	GFM1 EFG EFG1 GFM	751	4	5.69987	0.00529691	0.000223677	0.00507323	0.00522278	0.00390381	0.00813285	0.00496107	0.0163934	medium heterogeneity
Q06210	Glutamine--fructose-6-phosphate aminotransferase [isomerizing] 1 (EC 2.6.1.16) (D-fructose-6-phosphate amidotransferase 1) (Glutamine:fructose-6-phosphate amidotransferase 1) (GFAT 1) (GFAT1) (Hexosephosphate aminotransferase 1)	GFPT1	GFPT1 GFAT GFPT	699	8	5.10375	0.00192896	0.000552745	0.00137621	0.000798196	0.0015829	0.00249019	0.00180973	0.114754	medium heterogeneity
Q9UJY5	ADP-ribosylation factor-binding protein GGA1 (Gamma-adaptin-related protein 1) (Golgi-localized, gamma ear-containing, ARF-binding protein 1)	GGA1	GGA1	639	2	4.36073	0.014267	0.00545836	0.0088086	0.00188494	0.0165182	0.00645073	0.0140014	0.00273224	variable in ADCA
Q9BVM4	Gamma-glutamylaminecyclotransferase (GGACT) (EC 4.3.2.8) (AIG2-like domain-containing protein 1) (Gamma-glutamylamine cyclotransferase)	GGACT	GGACT A2LD1	153	3	5.35944	0.00293748	0.000888136	0.00204935	0.00142449	0.00246933	0.00266398	0.00251799	0.068306	medium heterogeneity
O75223	Gamma-glutamylcyclotransferase (EC 4.3.2.9) (Cytochrome c-releasing factor 21)	GGCT	GGCT C7orf24 CRF21	188	4	4.9679	0.00723816	0.00231776	0.0049204	0.00713653	0.00150123	0.00852951	0.0032583	0.0191257	medium heterogeneity
P38435	Vitamin K-dependent gamma-carboxylase (EC 4.1.1.90) (Gamma-glutamyl carboxylase) (Peptidyl-glutamate 4-carboxylase) (Vitamin K gamma glutamyl carboxylase)	GGCX	GGCX GC	758	2	5.10757	0.00540965	0.00321863	0.00219102	0.00531392	-0.000689733	0.00146456	-0.000151161	0.0601093	medium heterogeneity
Q92820	Gamma-glutamyl hydrolase (EC 3.4.19.9) (Conjugase) (GH) (Gamma-Glu-X carboxypeptidase)	GGH	GGH	318	4	5.17256	0.00370801	0.00114932	0.00255869	0.00313262	0.00114551	0.00507641	0.00212824	0.0519126	medium heterogeneity
P36269	Glutathione hydrolase 5 proenzyme (EC 3.4.19.13) (Gamma-glutamyl transpeptidase-related enzyme) (GGT-rel) (Gamma-glutamyltransferase 5) (GGT 5) (EC 2.3.2.2) (Gamma-glutamyltransferase-like activity 1) (Gamma-glutamyltranspeptidase 5) (Leukotriene-C4 hydrolase) (EC 3.4.19.14) [Cleaved into: Glutathione hydrolase 5 heavy chain; Glutathione hydrolase 5 light chain]	GGT5	GGT5 GGTLA1	586	2	5.22344	0.00461514	0.00157575	0.00303939	0.00541077	0.00142231	0.000776484	0.00126085	0.0409836	medium heterogeneity
Q8N2G8	GH3 domain-containing protein	GHDC	GHDC D11LGP1E LGP1	530	2	5.58999	0.0144886	0.00268369	0.0118049	0.0214678	0.00325753	0.00845817	0.00455769	0.00273224	variable in BPH
Q9BRT9	DNA replication complex GINS protein SLD5 (GINS complex subunit 4) [Cleaved into: DNA replication complex GINS protein SLD5, N-terminally processed]	GINS4	GINS4 SLD5	223	2	5.56213	0.011393	0.00261174	0.0087813	0.0147308	0.00346472	0.00688268	0.00431921	0.00273224	variable in BPH
O14908	PDZ domain-containing protein GIPC1 (GAIP C-terminus-interacting protein) (RGS-GAIP-interacting protein) (RGS19-interacting protein 1) (Synectin) (Tax interaction protein 2) (TIP-2)	GIPC1	GIPC1 C19orf3 GIPC RGS19IP1	333	2	5.80318	0.00106383	0.000511232	0.000552595	0.00100209	0.000372182	-0.000254647	0.000215475	0.226776	medium heterogeneity
P16278	Beta-galactosidase (EC 3.2.1.23) (Acid beta-galactosidase) (Lactase) (Elastin receptor 1)	GLB1	GLB1 ELNR1	677	3	4.75769	0.00523776	0.00144771	0.00379005	0.00694537	0.00133469	0.00169016	0.00142355	0.0300546	medium heterogeneity
P23378	Glycine dehydrogenase (decarboxylating), mitochondrial (EC 1.4.4.2) (Glycine cleavage system P protein) (Glycine decarboxylase) (Glycine dehydrogenase (aminomethyl-transferring))	GLDC	GLDC GCSP	1020	3	5.24805	0.0188914	0.00745945	0.011432	0.0163142	0.00909788	0.00378758	0.0077703	0.00273224	variable in BPH
Q92896	Golgi apparatus protein 1 (CFR-1) (Cysteine-rich fibroblast growth factor receptor) (E-selectin ligand 1) (ESL-1) (Golgi sialoglycoprotein MG-160)	GLG1	GLG1 CFR1 ESL1 MG160	1179	5	5.7156	0.00459674	0.000220928	0.00437581	0.00691475	0.0014289	0.00559974	0.00247161	0.0191257	medium heterogeneity
Q9H4G4	Golgi-associated plant pathogenesis-related protein 1 (GAPR-1) (Golgi-associated PR-1 protein) (Glioma pathogenesis-related protein 2) (GliPR 2)	GLIPR2	GLIPR2 C9orf19 GAPR1	154	6	5.20338	0.00264726	0.000679807	0.00196745	0.00305739	0.00123508	0.000894782	0.00115001	0.0710383	medium heterogeneity
Q04760	Lactoylglutathione lyase (EC 4.4.1.5) (Aldoketomutase) (Glyoxalase I) (Glx I) (Ketone-aldehyde mutase) (Methylglyoxalase) (S-D-lactoylglutathione methylglyoxal lyase)	GLO1	GLO1	184	6	5.69875	0.00550606	0.000495523	0.00501054	0.003433	0.00597474	0.00685056	0.0061937	0.0191257	medium heterogeneity
Q9HC38	Glyoxalase domain-containing protein 4	GLOD4	GLOD4 C17orf25 CGI-150 My027	313	10	5.36711	0.00341672	0.000473872	0.00294284	0.0030302	0.0035562	0.000840731	0.00287733	0.0409836	medium heterogeneity
O76003	Glutaredoxin-3 (PKC-interacting cousin of thioredoxin) (PICOT) (PKC-theta-interacting protein) (PKCq-interacting protein) (Thioredoxin-like protein 2)	GLRX3	GLRX3 PICOT TXNL2 HUSSY-22	335	3	5.20457	0.00457874	0.000777095	0.00380165	0.00300373	0.00468899	0.00353339	0.00440009	0.0300546	medium heterogeneity
O94925	Glutaminase kidney isoform, mitochondrial (GLS) (EC 3.5.1.2) (K-glutaminase) (L-glutamine amidohydrolase)	GLS	GLS GLS1 KIAA0838	669	2	6.22031	0.00516368	0.00155127	0.00361241	0.00588836	0.00155618	0.00295321	0.00190544	0.0355191	medium heterogeneity
Q9NZD2	Glycolipid transfer protein (GLTP)	GLTP	GLTP	209	2	5.56162	0.0137603	0.00135708	0.0124032	0.0160735	0.00687526	0.017976	0.00965045	0.00273224	variable in BPH and ADCA
P00367	Glutamate dehydrogenase 1, mitochondrial (GDH 1) (EC 1.4.1.3)	GLUD1	GLUD1 GLUD	558	10	5.48414	0.00481418	0.000663612	0.00415057	0.00692807	0.0013434	0.0042396	0.00206745	0.0245902	medium heterogeneity
P15104	Glutamine synthetase (GS) (EC 6.3.1.2) (Glutamate decarboxylase) (EC 4.1.1.15) (Glutamate--ammonia ligase)	GLUL	GLUL GLNS	373	2	6.0648	0.00451725	0.000722947	0.0037943	0.0045455	0.00313649	0.00351417	0.00323091	0.0300546	medium heterogeneity
Q969I3	Glycine N-acyltransferase-like protein 1 (EC 2.3.1.68) (Acyl-CoA:glycine N-acyltransferase-like protein 1) (Glutamine N-acyltransferase)	GLYATL1	GLYATL1 GNAT	302	2	4.90019	0.00778343	0.00387447	0.00390896	0.00670603	0.00322162	-0.00242021	0.00181116	0.0300546	medium heterogeneity
Q49A26	Putative oxidoreductase GLYR1 (EC 1.-.-.-) (3-hydroxyisobutyrate dehydrogenase-like protein) (Cytokine-like nuclear factor N-PAC) (Glyoxylate reductase 1 homolog) (Nuclear protein NP60) (Nuclear protein of 60 kDa)	GLYR1	GLYR1 HIBDL NP60	553	2	5.53804	0.00791431	0.0022193	0.00569501	0.00294207	0.00567622	0.0140102	0.00775971	0.010929	medium heterogeneity
P17900	Ganglioside GM2 activator (Cerebroside sulfate activator protein) (GM2-AP) (Sphingolipid activator protein 3) (SAP-3) [Cleaved into: Ganglioside GM2 activator isoform short]	GM2A	GM2A	193	4	5.00587	0.00375998	0.00260949	0.00115049	0.00135063	-0.000640007	0.00592158	0.00100039	0.13388	medium heterogeneity
O60547	GDP-mannose 4,6 dehydratase (EC 4.2.1.47) (GDP-D-mannose dehydratase) (GMD)	GMDS	GMDS	372	3	5.57293	0.00175694	0.000297842	0.0014591	0.00172634	0.00140985	0.000805077	0.00125866	0.103825	medium heterogeneity
Q9Y692	Glucocorticoid modulatory element-binding protein 1 (GMEB-1) (DNA-binding protein p96PIF) (Parvovirus initiation factor p96) (PIF p96)	GMEB1	GMEB1	573	2	5.23867	0.0224253	0.00328489	0.0191404	0.0302661	0.0134616	0.00279941	0.0107961	0.00273224	variable in BPH
Q96IJ6	Mannose-1-phosphate guanyltransferase alpha (GDP-mannose pyrophosphorylase A) (GMPP-alpha) (GTP-mannose-1-phosphate guanylyltransferase alpha)	GMPPA	GMPPA	420	6	5.10048	0.00771569	0.00147019	0.00624551	0.01049	0.00334449	0.00221507	0.00306214	0.00819672	variable in BPH
Q9Y5P6	Mannose-1-phosphate guanyltransferase beta (EC 2.7.7.13) (GDP-mannose pyrophosphorylase B) (GTP-mannose-1-phosphate guanylyltransferase beta)	GMPPB	GMPPB	360	6	5.08571	0.0019984	0.00113292	0.000865487	0.000292083	0.000992232	0.00220547	0.00129554	0.180328	medium heterogeneity
P36959	GMP reductase 1 (GMPR 1) (EC 1.7.1.7) (Guanosine 5'-monophosphate oxidoreductase 1) (Guanosine monophosphate reductase 1)	GMPR	GMPR GMPR1	345	4	4.35959	0.00873798	0.00717718	0.00156079	0.00338025	0.000677447	-0.00124753	0.000196202	0.0983607	medium heterogeneity
P49915	GMP synthase [glutamine-hydrolyzing] (EC 6.3.5.2) (GMP synthetase) (Glutamine amidotransferase)	GMPS	GMPS	693	7	4.67454	0.00624472	0.0018197	0.00442502	0.00186988	0.00763796	0.00245166	0.00634139	0.0191257	medium heterogeneity
P29992	Guanine nucleotide-binding protein subunit alpha-11 (G alpha-11) (G-protein subunit alpha-11) (Guanine nucleotide-binding protein G(y) subunit alpha)	GNA11	GNA11 GA11	359	2	4.87343	0.00429821	0.00300402	0.00129419	0.00260508	0.000478994	-0.000192855	0.000311032	0.128415	medium heterogeneity
Q14344	Guanine nucleotide-binding protein subunit alpha-13 (G alpha-13) (G-protein subunit alpha-13)	GNA13	GNA13	377	2	5.48037	0.0163088	0.000816106	0.0154927	0.0206248	0.00990401	0.0168624	0.0116436	0.00273224	variable in BPH and ADCA
P08754	Guanine nucleotide-binding protein G(k) subunit alpha (G(i) alpha-3)	GNAI3	GNAI3	354	3	4.33112	0.00727543	0.00225917	0.00501627	0.00638729	0.00209257	0.0096743	0.00398801	0.0191257	medium heterogeneity
P50148	Guanine nucleotide-binding protein G(q) subunit alpha (Guanine nucleotide-binding protein alpha-q)	GNAQ	GNAQ GAQ	359	3	5.51503	0.00863297	0.000884972	0.007748	0.00707301	0.0041369	0.0206062	0.00825423	0.00273224	variable in BPH and ADCA
P19086	Guanine nucleotide-binding protein G(z) subunit alpha (G(x) alpha chain) (Gz-alpha)	GNAZ	GNAZ	355	2	5.57387	0.00583395	0.00123002	0.00460393	0.00656622	0.00148715	0.0080674	0.00313221	0.0191257	medium heterogeneity
P62873	Guanine nucleotide-binding protein G(I)/G(S)/G(T) subunit beta-1 (Transducin beta chain 1)	GNB1	GNB1	340	5	5.01061	0.00164615	0.00129102	0.000355133	0.00142814	-0.000493938	-0.000316665	-0.00044962	0.306011	medium heterogeneity
Q9Y223	Bifunctional UDP-N-acetylglucosamine 2-epimerase/N-acetylmannosamine kinase (UDP-GlcNAc-2-epimerase/ManAc kinase) [Includes: UDP-N-acetylglucosamine 2-epimerase (hydrolyzing) (EC 3.2.1.183) (UDP-GlcNAc-2-epimerase) (Uridine diphosphate-N-acetylglucosamine-2-epimerase); N-acetylmannosamine kinase (EC 2.7.1.60) (ManAc kinase)]	GNE	GNE GLCNE	722	2	5.71625	0.0086861	0.00185301	0.0068331	0.00762265	0.00791607	0.0012155	0.00624093	0.00819672	variable in BPH and ADCA
Q13823	Nucleolar GTP-binding protein 2 (Autoantigen NGP-1)	GNL2	GNL2 NGP1	731	2	5.64337	0.0141143	0.00398974	0.0101245	0.00943241	0.011644	0.00764264	0.0106436	0.00273224	variable in BPH and ADCA
Q9BVP2	Guanine nucleotide-binding protein-like 3 (E2-induced gene 3 protein) (Novel nucleolar protein 47) (NNP47) (Nucleolar GTP-binding protein 3) (Nucleostemin)	GNL3	GNL3 E2IG3 NS	549	5	5.56952	0.000579172	0.000382498	0.000196674	2.64e-05	0.000314732	0.000353305	0.000324375	0.39071	stable in BPH and ADCA
Q14749	Glycine N-methyltransferase (EC 2.1.1.20)	GNMT	GNMT	295	8	5.0679	0.0065391	0.00108092	0.00545818	0.00382571	0.00640521	0.00751446	0.00668252	0.010929	medium heterogeneity
O15228	Dihydroxyacetone phosphate acyltransferase (DAP-AT) (DHAP-AT) (EC 2.3.1.42) (Acyl-CoA:dihydroxyacetonephosphateacyltransferase) (Glycerone-phosphate O-acyltransferase)	GNPAT	GNPAT DAPAT DHAPAT	680	2	4.35547	0.0436459	0.00698847	0.0366575	0.0350405	0.0133506	0.111429	0.0378702	0.00273224	variable in BPH and ADCA
P46926	Glucosamine-6-phosphate isomerase 1 (EC 3.5.99.6) (Glucosamine-6-phosphate deaminase 1) (GNPDA 1) (GlcN6P deaminase 1) (Oscillin)	GNPDA1	GNPDA1 GNPI HLN KIAA0060	289	2	5.58605	0.0045898	0.000640025	0.00394978	0.00458906	0.00427797	0.00104736	0.00347032	0.0300546	medium heterogeneity
Q96EK6	Glucosamine 6-phosphate N-acetyltransferase (EC 2.3.1.4) (Phosphoglucosamine acetylase) (Phosphoglucosamine transacetylase)	GNPNAT1	GNPNAT1 GNA1	184	4	4.78523	0.00572605	0.00427964	0.0014464	0.0016592	-0.000876605	0.00777703	0.0012868	0.106557	medium heterogeneity
P15586	N-acetylglucosamine-6-sulfatase (EC 3.1.6.14) (Glucosamine-6-sulfatase) (G6S)	GNS	GNS	552	3	5.02373	0.00216575	0.001005	0.00116074	0.00164303	0.000581239	0.00145239	0.000799028	0.13388	medium heterogeneity
Q92805	Golgin subfamily A member 1 (Golgin-97)	GOLGA1	GOLGA1	767	2	5.62239	0.0105146	0.00132029	0.00919432	0.00505299	0.0144167	0.00595129	0.0123003	0.00273224	variable in ADCA
Q08379	Golgin subfamily A member 2 (130 kDa cis-Golgi matrix protein) (GM130) (GM130 autoantigen) (Golgin-95)	GOLGA2	GOLGA2	1002	3	5.18755	0.00204878	0.00114028	0.000908506	0.00113795	0.000385473	0.00178926	0.000736419	0.172131	medium heterogeneity
Q08378	Golgin subfamily A member 3 (Golgi complex-associated protein of 170 kDa) (GCP170) (Golgin-160)	GOLGA3	GOLGA3	1498	4	5.5378	0.00405635	0.000641854	0.0034145	0.00124972	0.00643562	0.000845474	0.00503808	0.0409836	medium heterogeneity
Q13439	Golgin subfamily A member 4 (256 kDa golgin) (Golgin-245) (Protein 72.1) (Trans-Golgi p230)	GOLGA4	GOLGA4	2230	5	5.4915	0.00710622	0.000483013	0.00662321	0.011495	0.00233091	0.00488479	0.00296938	0.00819672	variable in BPH
Q14789	Golgin subfamily B member 1 (372 kDa Golgi complex-associated protein) (GCP372) (Giantin) (Macrogolgin)	GOLGB1	GOLGB1	3259	6	5.43479	0.00133564	0.000234502	0.00110114	0.00175215	0.000570986	0.000738541	0.000612875	0.142077	medium heterogeneity
Q8NBJ4	Golgi membrane protein 1 (Golgi membrane protein GP73) (Golgi phosphoprotein 2)	GOLM1	GOLM1 C9orf155 GOLPH2 PSEC0242 UNQ686/PRO1326	401	3	5.44031	0.00209471	0.00168745	0.000407259	0.00168291	-0.00077679	0.000132447	-0.000549481	0.278689	medium heterogeneity
Q9H4A6	Golgi phosphoprotein 3 (Coat protein GPP34) (Mitochondrial DNA absence factor) (MIDAS)	GOLPH3	GOLPH3 GPP34	298	2	4.658	0.00373299	0.00264191	0.00109108	0.00202538	0.00111501	-0.0017836	0.000390358	0.142077	medium heterogeneity
Q9H4A5	Golgi phosphoprotein 3-like (GPP34-related protein)	GOLPH3L	GOLPH3L GPP34R	285	2	5.20258	0.0110373	0.001526	0.0095113	0.0133693	0.00317571	0.0169442	0.00661783	0.00273224	variable in BPH
Q9H8Y8	Golgi reassembly-stacking protein 2 (GRS2) (Golgi phosphoprotein 6) (GOLPH6) (Golgi reassembly-stacking protein of 55 kDa) (GRASP55) (p59)	GORASP2	GORASP2 GOLPH6	452	4	4.31429	0.00706911	0.00209729	0.00497182	0.00397561	0.00487667	0.00824591	0.00571898	0.0191257	medium heterogeneity
P17174	Aspartate aminotransferase, cytoplasmic (cAspAT) (EC 2.6.1.1) (EC 2.6.1.3) (Cysteine aminotransferase, cytoplasmic) (Cysteine transaminase, cytoplasmic) (cCAT) (Glutamate oxaloacetate transaminase 1) (Transaminase A)	GOT1	GOT1	413	9	5.24451	0.000354687	0.000322172	3.25e-05	5.73e-05	5.04e-06	4.05e-05	1.39e-05	0.472678	stable in BPH and ADCA
P00505	Aspartate aminotransferase, mitochondrial (mAspAT) (EC 2.6.1.1) (EC 2.6.1.7) (Fatty acid-binding protein) (FABP-1) (Glutamate oxaloacetate transaminase 2) (Kynurenine aminotransferase 4) (Kynurenine aminotransferase IV) (Kynurenine--oxoglutarate transaminase 4) (Kynurenine--oxoglutarate transaminase IV) (Plasma membrane-associated fatty acid-binding protein) (FABPpm) (Transaminase A)	GOT2	GOT2	430	10	5.25387	0.00583072	0.00114215	0.00468857	0.00585387	0.00319223	0.0056817	0.0038146	0.0191257	medium heterogeneity
P40197	Platelet glycoprotein V (GPV) (Glycoprotein 5) (CD antigen CD42d)	GP5	GP5	560	3	5.8258	0.00452689	0.00145035	0.00307654	0.00467077	0.00227278	0.00070514	0.00188087	0.0409836	medium heterogeneity
P21695	Glycerol-3-phosphate dehydrogenase [NAD(+)], cytoplasmic (GPD-C) (GPDH-C) (EC 1.1.1.8)	GPD1	GPD1	349	3	5.77923	0.0017825	0.00126162	0.000520885	2.17e-05	-0.0005092	0.00510883	0.000895308	0.229508	medium heterogeneity
Q8N335	Glycerol-3-phosphate dehydrogenase 1-like protein (GPD1-L) (EC 1.1.1.8)	GPD1L	GPD1L KIAA0089	351	4	4.81127	0.0124289	0.0039064	0.00852245	0.0153641	0.0036021	0.00275865	0.00339124	0.00273224	variable in BPH
P43304	Glycerol-3-phosphate dehydrogenase, mitochondrial (GPD-M) (GPDH-M) (EC 1.1.5.3) (mtGPD)	GPD2	GPD2	727	7	5.06716	0.00128409	0.000971729	0.00031236	0.00042525	0.000278084	7.65e-05	0.000227693	0.327869	medium heterogeneity
Q92917	G-patch domain and KOW motifs-containing protein (G-patch domain-containing protein 5) (Protein MOS2 homolog) (Protein T54)	GPKOW	GPKOW GPATC5 GPATCH5 T54	476	2	4.92175	0.020046	0.00468205	0.0153639	0.0147394	0.0083842	0.0381767	0.0158323	0.00273224	variable in BPH and ADCA
Q9HCN4	GPN-loop GTPase 1 (EC 3.6.5.-) (MBD2-interacting protein) (MBDin) (RNAPII-associated protein 4) (XPA-binding protein 1)	GPN1	GPN1 MBDIN RPAP4 XAB1 HUSSY-23	374	2	5.47866	0.0144363	0.00213307	0.0123032	0.0132002	0.0118009	0.0111191	0.0116305	0.00273224	variable in BPH and ADCA
Q13098	COP9 signalosome complex subunit 1 (SGN1) (Signalosome subunit 1) (G protein pathway suppressor 1) (GPS-1) (JAB1-containing signalosome subunit 1) (Protein MFH)	GPS1	GPS1 COPS1 CSN1	491	3	5.61497	0.0131512	0.00186585	0.0112854	0.0138317	0.00627556	0.0186759	0.00937565	0.00273224	variable in BPH and ADCA
P24298	Alanine aminotransferase 1 (ALT1) (EC 2.6.1.2) (Glutamate pyruvate transaminase 1) (GPT 1) (Glutamic--alanine transaminase 1) (Glutamic--pyruvic transaminase 1)	GPT	GPT AAT1 GPT1	496	2	5.20741	0.0112546	0.00194781	0.00930681	0.00254144	0.011265	0.0237283	0.0143808	0.00273224	variable in ADCA
P07203	Glutathione peroxidase 1 (GPx-1) (GSHPx-1) (EC 1.11.1.9) (Cellular glutathione peroxidase)	GPX1	GPX1	203	4	5.38928	0.00230947	0.000804702	0.00150477	0.00339676	-0.000208591	0.000968881	8.58e-05	0.103825	medium heterogeneity
P22352	Glutathione peroxidase 3 (GPx-3) (GSHPx-3) (EC 1.11.1.9) (Extracellular glutathione peroxidase) (Plasma glutathione peroxidase) (GPx-P) (GSHPx-P)	GPX3	GPX3 GPXP	226	5	5.26323	0.0109232	0.00242662	0.00849654	0.0147074	0.00478094	0.00101068	0.00383838	0.00273224	variable in BPH
P36969	Phospholipid hydroperoxide glutathione peroxidase (PHGPx) (EC 1.11.1.12) (Glutathione peroxidase 4) (GPx-4) (GSHPx-4)	GPX4	GPX4	197	2	5.71058	0.00749783	0.00174159	0.00575624	0.0123038	0.00113824	-3.23e-05	0.000845607	0.010929	medium heterogeneity
Q96CP6	GRAM domain-containing protein 1A	GRAMD1A	GRAMD1A KIAA1533	724	2	5.62787	0.00812458	0.00119812	0.00692646	0.00878502	0.00401069	0.0100981	0.00553255	0.00546448	variable in BPH and ADCA
Q96HH9	GRAM domain-containing protein 2B (HCV NS3-transactivated protein 2)	GRAMD2B	GRAMD2B GRAMD3 NS3TP2	432	2	5.53803	0.0145902	0.00127511	0.0133151	0.00549543	0.0158273	0.0292379	0.0191799	0.00273224	variable in ADCA
O75791	GRB2-related adapter protein 2 (Adapter protein GRID) (GRB-2-like protein) (GRB2L) (GRBLG) (GRBX) (Grf40 adapter protein) (Grf-40) (Growth factor receptor-binding protein) (Hematopoietic cell-associated adapter protein GrpL) (P38) (Protein GADS) (SH3-SH2-SH3 adapter Mona)	GRAP2	GRAP2 GADS GRB2L GRID	330	2	5.62866	0.0179812	0.00241368	0.0155675	0.026894	0.00477733	0.0139584	0.00707259	0.00273224	variable in BPH
P62993	Growth factor receptor-bound protein 2 (Adapter protein GRB2) (Protein Ash) (SH2/SH3 adapter GRB2)	GRB2	GRB2 ASH	217	2	5.34392	0.0026649	0.000908477	0.00175643	0.0026876	0.000603112	0.00242287	0.00105805	0.0874317	medium heterogeneity
Q4V328	GRIP1-associated protein 1 (GRASP-1) [Cleaved into: GRASP-1 C-terminal chain (30kDa C-terminus form)]	GRIPAP1	GRIPAP1 KIAA1167	841	3	5.58657	0.00192008	0.000519189	0.00140089	0.00187078	0.000745905	0.00195619	0.00104848	0.114754	medium heterogeneity
P25098	Beta-adrenergic receptor kinase 1 (Beta-ARK-1) (EC 2.7.11.15) (G-protein coupled receptor kinase 2)	GRK2	GRK2 ADRBK1 BARK BARK1	689	2	5.20346	0.0238756	0.00374016	0.0201355	0.0300286	0.00806479	0.026668	0.0127156	0.00273224	variable in BPH
Q9HAV7	GrpE protein homolog 1, mitochondrial (HMGE) (Mt-GrpE#1)	GRPEL1	GRPEL1 GREPEL1	217	2	4.64627	0.0101415	0.00911874	0.00102276	0.00109184	0.00240356	-0.00332686	0.000970953	0.153005	medium heterogeneity
Q9BQ67	Glutamate-rich WD repeat-containing protein 1	GRWD1	GRWD1 GRWD KIAA1942 WDR28	446	3	5.65983	0.0201785	0.00334314	0.0168353	0.0210534	0.00775086	0.0314343	0.0136717	0.00273224	variable in BPH and ADCA
Q8TAX9	Gasdermin-B (Gasdermin-like protein)	GSDMB	GSDMB GSDML PP4052 PRO2521	411	3	5.74275	0.00240206	0.000695208	0.00170685	0.00273431	0.0012173	9.31e-05	0.000936251	0.0874317	medium heterogeneity
P57764	Gasdermin-D (Gasdermin domain-containing protein 1) [Cleaved into: Gasdermin-D, N-terminal (GSDMD-NT); Gasdermin-D, C-terminal (GSDMD-CT)]	GSDMD	GSDMD DFNA5L GSDMDC1 FKSG10	484	2	5.33302	0.00493544	0.00297068	0.00196475	0.00144937	0.00352611	-0.00117319	0.00235128	0.0710383	medium heterogeneity
Q14687	Genetic suppressor element 1	GSE1	GSE1 KIAA0182	1217	2	5.09827	0.00238115	0.00108686	0.0012943	0.000919687	0.000436281	0.00499218	0.00157526	0.128415	medium heterogeneity
P06396	Gelsolin (AGEL) (Actin-depolymerizing factor) (ADF) (Brevin)	GSN	GSN	782	18	5.55605	0.00229278	0.000809804	0.00148298	4.48e-05	0.000738571	0.00803073	0.00256161	0.103825	medium heterogeneity
P00390	Glutathione reductase, mitochondrial (GR) (GRase) (EC 1.8.1.7)	GSR	GSR GLUR GRD1	522	8	5.18442	0.0015983	0.000434072	0.00116423	0.00130607	0.000562871	0.0025428	0.00105785	0.13388	medium heterogeneity
P48637	Glutathione synthetase (GSH synthetase) (GSH-S) (EC 6.3.2.3) (Glutathione synthase)	GSS	GSS	474	5	5.10531	0.00250554	0.000771845	0.00173369	0.00117836	0.00112101	0.00523774	0.00215019	0.0874317	medium heterogeneity
Q9Y2Q3	Glutathione S-transferase kappa 1 (EC 2.5.1.18) (GST 13-13) (GST class-kappa) (GSTK1-1) (hGSTK1) (Glutathione S-transferase subunit 13)	GSTK1	GSTK1 HDCMD47P	226	4	5.60987	0.00185653	0.000125832	0.0017307	0.00171239	0.000917639	0.00422482	0.00174443	0.0874317	medium heterogeneity
P28161	Glutathione S-transferase Mu 2 (EC 2.5.1.18) (GST class-mu 2) (GSTM2-2)	GSTM2	GSTM2 GST4	218	3	5.45448	0.00459154	0.000778229	0.00381331	0.00298256	0.00367947	0.0067071	0.00443638	0.0300546	medium heterogeneity
P21266	Glutathione S-transferase Mu 3 (EC 2.5.1.18) (GST class-mu 3) (GSTM3-3) (hGSTM3-3)	GSTM3	GSTM3 GST5	225	8	5.40985	0.00395322	0.000353333	0.00359989	0.00436318	0.00123532	0.00840374	0.00302743	0.0355191	medium heterogeneity
P78417	Glutathione S-transferase omega-1 (GSTO-1) (EC 2.5.1.18) (Glutathione S-transferase omega 1-1) (GSTO 1-1) (Glutathione-dependent dehydroascorbate reductase) (EC 1.8.5.1) (Monomethylarsonic acid reductase) (MMA(V) reductase) (EC 1.20.4.2) (S-(Phenacyl)glutathione reductase) (SPG-R)	GSTO1	GSTO1 GSTTLP28	241	4	5.49439	0.00254762	0.000699973	0.00184765	0.0021532	0.00166284	0.00148542	0.00161849	0.0819672	medium heterogeneity
P09211	Glutathione S-transferase P (EC 2.5.1.18) (GST class-pi) (GSTP1-1)	GSTP1	GSTP1 FAEES3 GST3	210	9	5.30911	0.00563489	0.000898312	0.00473657	0.0081617	0.00218505	0.00211576	0.00216773	0.0191257	medium heterogeneity
P30711	Glutathione S-transferase theta-1 (EC 2.5.1.18) (GST class-theta-1) (Glutathione transferase T1-1)	GSTT1	GSTT1	240	4	5.39424	0.00226732	0.00152088	0.000746448	-0.000530898	0.00181626	0.00136904	0.00170446	0.196721	medium heterogeneity
O43708	Maleylacetoacetate isomerase (MAAI) (EC 5.2.1.2) (GSTZ1-1) (Glutathione S-transferase zeta 1) (EC 2.5.1.18)	GSTZ1	GSTZ1 MAAI	216	6	5.29352	0.00250122	0.000747599	0.00175362	0.000933954	0.0026918	0.00139804	0.00236836	0.0874317	medium heterogeneity
P13984	General transcription factor IIF subunit 2 (EC 3.6.4.12) (ATP-dependent helicase GTF2F2) (General transcription factor IIF 30 kDa subunit) (Transcription initiation factor IIF subunit beta) (TFIIF-beta) (Transcription initiation factor RAP30)	GTF2F2	GTF2F2 RAP30	249	3	5.81004	0.00338645	0.00120065	0.0021858	0.00192786	0.00207268	0.00329894	0.00237925	0.0601093	medium heterogeneity
Q9Y5Q9	General transcription factor 3C polypeptide 3 (Transcription factor IIIC 102 kDa subunit) (TFIIIC 102 kDa subunit) (TFIIIC102) (Transcription factor IIIC subunit gamma) (TF3C-gamma)	GTF3C3	GTF3C3	886	2	5.51476	0.00783873	0.00216365	0.00567509	0.00109819	0.0116611	0.0014479	0.00910777	0.010929	medium heterogeneity
Q9UKN8	General transcription factor 3C polypeptide 4 (EC 2.3.1.48) (TF3C-delta) (Transcription factor IIIC 90 kDa subunit) (TFIIIC 90 kDa subunit) (TFIIIC90) (Transcription factor IIIC subunit delta)	GTF3C4	GTF3C4	822	3	5.87421	0.00629909	0.000898053	0.00540104	0.00644574	0.00350252	0.0079625	0.00461751	0.0136612	medium heterogeneity
Q969Y2	tRNA modification GTPase GTPBP3, mitochondrial (GTP-binding protein 3) (Mitochondrial GTP-binding protein 1)	GTPBP3	GTPBP3 MTGP1	492	2	5.07955	0.0179357	0.0125626	0.00537314	0.00396502	0.00774683	0.00247646	0.00642924	0.0136612	medium heterogeneity
Q9BZE4	Nucleolar GTP-binding protein 1 (Chronic renal failure gene protein) (GTP-binding protein NGB)	GTPBP4	GTPBP4 CRFG NOG1	634	2	5.2405	0.00193797	0.000305944	0.00163203	0.000478618	0.00114409	0.00655605	0.00249708	0.0901639	medium heterogeneity
Q8N3Z3	GTP-binding protein 8	GTPBP8	GTPBP8	284	2	5.22159	0.00558716	0.00383849	0.00174867	-0.000386932	0.00312295	0.00403265	0.00335037	0.0874317	medium heterogeneity
P08236	Beta-glucuronidase (EC 3.2.1.31) (Beta-G1)	GUSB	GUSB	651	9	5.21304	0.00302375	0.000638387	0.00238537	0.00259362	0.00215839	0.00244153	0.00222917	0.057377	medium heterogeneity
P46976	Glycogenin-1 (GN-1) (GN1) (EC 2.4.1.186)	GYG1	GYG1 GYG	350	2	5.79246	0.00967702	0.00289806	0.00677896	0.0119767	0.00374527	0.000286811	0.00288066	0.00819672	variable in BPH
P13807	Glycogen [starch] synthase, muscle (EC 2.4.1.11)	GYS1	GYS1 GYS	737	2	4.64399	0.00723742	0.00278539	0.00445203	0.00485139	0.0014765	0.0121805	0.00415251	0.0191257	medium heterogeneity
P07305	Histone H1.0 (Histone H1') (Histone H1(0)) [Cleaved into: Histone H1.0, N-terminally processed]	H1F0	H1F0 H1FV	194	5	5.20999	0.00886615	0.00153991	0.00732625	0.00239393	0.00701647	0.0230525	0.0110255	0.00273224	variable in ADCA
Q92522	Histone H1x	H1FX	H1FX	213	2	5.71816	0.00904594	0.000921433	0.00812451	0.013678	0.00205209	0.00968127	0.00395939	0.00273224	variable in BPH
O75367	Core histone macro-H2A.1 (Histone macroH2A1) (mH2A1) (Histone H2A.y) (H2A/y) (Medulloblastoma antigen MU-MB-50.205)	H2AFY	H2AFY MACROH2A1	372	9	5.08102	0.0067087	0.000738791	0.00596991	0.0113721	3.59e-05	0.00756535	0.00191829	0.00819672	variable in BPH
O95479	GDH/6PGL endoplasmic bifunctional protein [Includes: Glucose 1-dehydrogenase (EC 1.1.1.47) (Glucose-6-phosphate dehydrogenase) (EC 1.1.1.363); 6-phosphogluconolactonase (6PGL) (EC 3.1.1.31)]	H6PD	H6PD GDH	791	2	5.1259	0.00216707	0.000718477	0.00144859	0.000587537	0.00232064	0.00141564	0.00209439	0.106557	medium heterogeneity
P46952	3-hydroxyanthranilate 3,4-dioxygenase (EC 1.13.11.6) (3-hydroxyanthranilate oxygenase) (3-HAO) (3-hydroxyanthranilic acid dioxygenase) (HAD)	HAAO	HAAO	286	3	5.85209	0.00978226	0.00437987	0.00540239	0.0122018	0.000282033	0.000365344	0.000302861	0.0136612	medium heterogeneity
Q9P035	Very-long-chain (3R)-3-hydroxyacyl-CoA dehydratase 3 (EC 4.2.1.134) (3-hydroxyacyl-CoA dehydratase 3) (HACD3) (Butyrate-induced protein 1) (B-ind1) (hB-ind1) (Protein-tyrosine phosphatase-like A domain-containing protein 1)	HACD3	HACD3 BIND1 PTPLAD1	362	2	4.68684	0.00795501	0.00438953	0.00356547	0.00168058	0.00376275	0.00862834	0.00497915	0.0355191	medium heterogeneity
Q9UJ83	2-hydroxyacyl-CoA lyase 1 (EC 4.1.-.-) (2-hydroxyphytanoyl-CoA lyase) (2-HPCL) (Phytanoyl-CoA 2-hydroxylase 2)	HACL1	HACL1 HPCL HPCL2 PHYH2 HSPC279	578	2	5.60389	0.00519232	0.00155437	0.00363795	0.00271058	0.00573327	0.000134102	0.00433348	0.0327869	medium heterogeneity
Q16836	Hydroxyacyl-coenzyme A dehydrogenase, mitochondrial (HCDH) (EC 1.1.1.35) (Medium and short-chain L-3-hydroxyacyl-coenzyme A dehydrogenase) (Short-chain 3-hydroxyacyl-CoA dehydrogenase)	HADH	HADH HAD HADHSC SCHAD	314	10	5.40489	0.00465144	0.00217637	0.00247507	0.00239409	0.00158576	0.00538591	0.0025358	0.0546448	medium heterogeneity
P40939	Trifunctional enzyme subunit alpha, mitochondrial (78 kDa gastrin-binding protein) (TP-alpha) [Includes: Long-chain enoyl-CoA hydratase (EC 4.2.1.17); Long chain 3-hydroxyacyl-CoA dehydrogenase (EC 1.1.1.211)]	HADHA	HADHA HADH	763	24	5.34397	0.00234285	0.000656743	0.00168611	0.00268531	0.000149186	0.0032993	0.000936714	0.0901639	medium heterogeneity
P55084	Trifunctional enzyme subunit beta, mitochondrial (TP-beta) [Includes: 3-ketoacyl-CoA thiolase (EC 2.3.1.16) (Acetyl-CoA acyltransferase) (Beta-ketothiolase)]	HADHB	HADHB MSTP029	474	19	5.21586	0.00150024	0.000123253	0.00137699	0.00152162	0.00122448	0.00140065	0.00126852	0.114754	medium heterogeneity
Q16775	Hydroxyacylglutathione hydrolase, mitochondrial (EC 3.1.2.6) (Glyoxalase II) (Glx II)	HAGH	HAGH GLO2 HAGH1	308	4	5.17751	0.00132604	0.000523944	0.000802097	0.00146577	0.000384298	6.45e-05	0.00030434	0.185792	medium heterogeneity
P10915	Hyaluronan and proteoglycan link protein 1 (Cartilage-linking protein 1) (Cartilage-link protein) (Proteoglycan link protein)	HAPLN1	HAPLN1 CRTL1	354	2	5.49455	0.00392401	0.0016623	0.00226172	0.00283148	0.00171454	0.00219396	0.00183439	0.0601093	medium heterogeneity
P12081	Histidine--tRNA ligase, cytoplasmic (EC 6.1.1.21) (Histidyl-tRNA synthetase) (HisRS)	HARS	HARS HRS	509	3	5.27409	0.00362963	0.0021934	0.00143623	0.0025993	0.000239325	0.00153772	0.000563923	0.112022	medium heterogeneity
O14929	Histone acetyltransferase type B catalytic subunit (EC 2.3.1.48) (Histone acetyltransferase 1)	HAT1	HAT1 KAT1	419	2	5.19552	0.00536567	0.0032182	0.00214747	0.00278434	-0.000511025	0.00821238	0.00166983	0.0655738	medium heterogeneity
P69905	Hemoglobin subunit alpha (Alpha-globin) (Hemoglobin alpha chain)	HBA1;	HBA1; HBA2	142	16	5.94189	0.0160918	0.00262657	0.0134652	0.0118279	0.0166529	0.00881429	0.0146932	0.00273224	variable in BPH and ADCA
P68871	Hemoglobin subunit beta (Beta-globin) (Hemoglobin beta chain) [Cleaved into: LVV-hemorphin-7; Spinorphin]	HBB	HBB	147	9	6.59633	0.0185016	0.000986257	0.0175153	0.0132893	0.024033	0.0106404	0.0206849	0.00273224	variable in BPH and ADCA
P02042	Hemoglobin subunit delta (Delta-globin) (Hemoglobin delta chain)	HBD	HBD	147	10	5.63669	0.00951046	0.000230675	0.00927978	0.00684398	0.0120434	0.00829621	0.0111066	0.00273224	variable in BPH and ADCA
Q9Y450	HBS1-like protein (ERFS)	HBS1L	HBS1L HBS1 KIAA1038	684	3	5.18572	0.00938359	0.00242618	0.00695741	0.00334229	0.0109166	0.00592523	0.00966875	0.00546448	variable in ADCA
P51610	Host cell factor 1 (HCF) (HCF-1) (C1 factor) (CFF) (VCAF) (VP16 accessory protein) [Cleaved into: HCF N-terminal chain 1; HCF N-terminal chain 2; HCF N-terminal chain 3; HCF N-terminal chain 4; HCF N-terminal chain 5; HCF N-terminal chain 6; HCF C-terminal chain 1; HCF C-terminal chain 2; HCF C-terminal chain 3; HCF C-terminal chain 4; HCF C-terminal chain 5; HCF C-terminal chain 6]	HCFC1	HCFC1 HCF1 HFC1	2035	6	5.17616	0.00379696	0.00131482	0.00248214	0.00311406	0.000238266	0.00731802	0.0020082	0.0546448	medium heterogeneity
Q9Y5Z7	Host cell factor 2 (HCF-2) (C2 factor)	HCFC2	HCFC2	792	2	5.38848	0.0157225	0.00278972	0.0129328	0.0246729	0.00324227	0.00678427	0.00412777	0.00273224	variable in BPH
P08631	Tyrosine-protein kinase HCK (EC 2.7.10.2) (Hematopoietic cell kinase) (Hemopoietic cell kinase) (p59-HCK/p60-HCK) (p59Hck) (p61Hck)	HCK	HCK	526	2	5.54423	0.00225535	0.000720972	0.00153438	0.00121745	0.00109693	0.00379752	0.00177208	0.101093	medium heterogeneity
P14317	Hematopoietic lineage cell-specific protein (Hematopoietic cell-specific LYN substrate 1) (LckBP1) (p75)	HCLS1	HCLS1 HS1	486	4	5.01549	0.00240246	0.000465394	0.00193707	0.000800757	0.00238527	0.0040014	0.00278931	0.0737705	medium heterogeneity
Q13547	Histone deacetylase 1 (HD1) (EC 3.5.1.98)	HDAC1	HDAC1 RPD3L1	482	2	5.34141	0.0220138	0.0129894	0.00902445	0.0138645	0.00490603	0.00685946	0.00539439	0.00273224	variable in BPH
Q9UQL6	Histone deacetylase 5 (HD5) (EC 3.5.1.98) (Antigen NY-CO-9)	HDAC5	HDAC5 KIAA0600	1122	2	5.27781	0.00627318	0.00204306	0.00423012	0.00788305	0.00129006	0.00209156	0.00149043	0.0245902	medium heterogeneity
Q9UBN7	Histone deacetylase 6 (HD6) (EC 3.5.1.98)	HDAC6	HDAC6 KIAA0901 JM21	1215	2	3.98204	0.0104441	0.00745516	0.0029889	0.00217144	0.00370501	0.00329291	0.00360199	0.0409836	medium heterogeneity
Q8WUI4	Histone deacetylase 7 (HD7) (EC 3.5.1.98) (Histone deacetylase 7A) (HD7a)	HDAC7	HDAC7 HDAC7A	952	3	5.59687	0.00171807	0.00137002	0.000348059	-8.27e-05	0.000615266	0.000838612	0.000671102	0.306011	medium heterogeneity
P51858	Hepatoma-derived growth factor (HDGF) (High mobility group protein 1-like 2) (HMG-1L2)	HDGF	HDGF HMG1L2	240	7	5.49928	0.00384609	0.000909274	0.00293682	0.00447858	0.0014627	0.00273389	0.0017805	0.0409836	medium heterogeneity
Q7Z4V5	Hepatoma-derived growth factor-related protein 2 (HRP-2) (Hepatoma-derived growth factor 2) (HDGF-2)	HDGFL2	HDGFL2 HDGF2 HDGFRP2 UNQ785/PRO1604	671	2	5.06757	0.0105735	0.00439942	0.00617404	0.00808057	0.00400516	0.00696107	0.00474414	0.00819672	variable in BPH and ADCA
Q9Y3E1	Hepatoma-derived growth factor-related protein 3 (HRP-3) (Hepatoma-derived growth factor 2) (HDGF-2)	HDGFL3	HDGFL3 HDGF2 HDGFRP3 CGI-142	203	3	5.0925	0.00397932	0.00152046	0.00245886	0.00239254	0.00259855	0.00223878	0.00250861	0.057377	medium heterogeneity
Q9BSH5	Haloacid dehalogenase-like hydrolase domain-containing protein 3	HDHD3	HDHD3 C9orf158	251	4	5.57262	0.00253976	0.00163532	0.000904449	0.000999797	0.00122969	-0.000357309	0.000832938	0.174863	medium heterogeneity
Q9BXW7	Haloacid dehalogenase-like hydrolase domain-containing 5 (Cat eye syndrome critical region protein 5)	HDHD5	HDHD5 CECR5	423	2	5.44812	0.0270786	0.00173388	0.0253448	0.0250773	0.0316513	0.00722761	0.0255454	0.00273224	variable in BPH and ADCA
Q00341	Vigilin (High density lipoprotein-binding protein) (HDL-binding protein)	HDLBP	HDLBP HBP VGL	1268	11	5.704	0.00257436	0.000351812	0.00222254	0.00181996	0.000975337	0.00717192	0.00252448	0.0601093	medium heterogeneity
Q9H583	HEAT repeat-containing protein 1 (Protein BAP28) (U3 small nucleolar RNA-associated protein 10 homolog) [Cleaved into: HEAT repeat-containing protein 1, N-terminally processed]	HEATR1	HEATR1 BAP28 UTP10	2144	3	5.37181	0.00316863	0.00106986	0.00209877	0.00241671	0.00177283	0.00212278	0.00186032	0.068306	medium heterogeneity
Q9P2D3	HEAT repeat-containing protein 5B	HEATR5B	HEATR5B KIAA1414	2071	5	4.98517	0.00442371	0.00154131	0.0028824	0.00188659	0.00142714	0.0102356	0.00362926	0.0409836	medium heterogeneity
Q9NRV9	Heme-binding protein 1 (p22HBP)	HEBP1	HEBP1 HBP	189	2	4.6559	0.00426732	0.00185938	0.00240794	0.00394442	0.00110756	0.00169963	0.00125558	0.057377	medium heterogeneity
Q9Y5Z4	Heme-binding protein 2 (Placental protein 23) (PP23) (Protein SOUL)	HEBP2	HEBP2 C6orf34 SOUL	205	8	5.36779	0.00334062	0.00062153	0.00271909	0.00310747	0.0025664	0.002012	0.0024278	0.0409836	medium heterogeneity
Q9ULT8	E3 ubiquitin-protein ligase HECTD1 (EC 2.3.2.26) (E3 ligase for inhibin receptor) (EULIR) (HECT domain-containing protein 1) (HECT-type E3 ubiquitin transferase HECTD1)	HECTD1	HECTD1 KIAA1131	2610	5	5.51315	0.011544	0.00100352	0.0105405	0.0173151	0.00409633	0.00954883	0.00545945	0.00273224	variable in BPH
Q9Y4D8	Probable E3 ubiquitin-protein ligase HECTD4 (EC 2.3.2.26) (HECT domain-containing protein 4) (HECT-type E3 ubiquitin transferase HECTD4)	HECTD4	HECTD4 C12orf51 KIAA0614	3996	4	5.81525	0.00213372	0.000295539	0.00183818	0.00320443	0.000787117	0.000892626	0.000813494	0.0819672	medium heterogeneity
Q9BQS7	Hephaestin (EC 1.-.-.-)	HEPH	HEPH KIAA0698 UNQ2562/PRO6242	1158	2	5.38915	0.0105227	0.00274724	0.00777544	0.00986456	0.00185378	0.0192731	0.00620861	0.00273224	variable in BPH and ADCA
Q15751	Probable E3 ubiquitin-protein ligase HERC1 (EC 2.3.2.26) (HECT domain and RCC1-like domain-containing protein 1) (HECT-type E3 ubiquitin transferase HERC1) (p532) (p619)	HERC1	HERC1	4861	3	5.72494	0.0038625	0.00225682	0.00160568	-0.000130555	0.0036885	0.000565953	0.00290786	0.0901639	medium heterogeneity
Q5GLZ8	Probable E3 ubiquitin-protein ligase HERC4 (EC 2.3.2.26) (HECT domain and RCC1-like domain-containing protein 4) (HECT-type E3 ubiquitin transferase HERC4)	HERC4	HERC4 KIAA1593	1057	2	5.65369	0.00572065	0.00078291	0.00493775	0.00333491	0.00696518	0.00366393	0.00613987	0.0191257	medium heterogeneity
P06865	Beta-hexosaminidase subunit alpha (EC 3.2.1.52) (Beta-N-acetylhexosaminidase subunit alpha) (Hexosaminidase subunit A) (N-acetyl-beta-glucosaminidase subunit alpha)	HEXA	HEXA	529	6	5.26275	0.00566191	0.0011597	0.00450221	0.00270684	0.00354229	0.0127681	0.00584874	0.0191257	medium heterogeneity
P07686	Beta-hexosaminidase subunit beta (EC 3.2.1.52) (Beta-N-acetylhexosaminidase subunit beta) (Hexosaminidase subunit B) (Cervical cancer proto-oncogene 7 protein) (HCC-7) (N-acetyl-beta-glucosaminidase subunit beta) [Cleaved into: Beta-hexosaminidase subunit beta chain B; Beta-hexosaminidase subunit beta chain A]	HEXB	HEXB HCC7	556	16	5.36303	0.00340149	0.00111711	0.00228438	0.00119673	0.00100738	0.00937835	0.00310013	0.0601093	medium heterogeneity
Q93099	Homogentisate 1,2-dioxygenase (EC 1.13.11.5) (Homogentisate oxygenase) (Homogentisic acid oxidase) (Homogentisicase)	HGD	HGD HGO	445	4	5.06963	0.00519762	0.00328321	0.00191441	0.00352212	0.000681048	0.000791391	0.000708634	0.0765027	medium heterogeneity
Q9BTY7	Protein HGH1 homolog	HGH1	HGH1 C8orf30A C8orf30B FAM203A FAM203B	390	2	5.03229	0.0171264	0.00524359	0.0118828	0.0162658	0.0100414	0.00425793	0.0085955	0.00273224	variable in BPH and ADCA
O14964	Hepatocyte growth factor-regulated tyrosine kinase substrate (Hrs) (Protein pp110)	HGS	HGS HRS	777	4	4.87041	0.00218927	0.000782333	0.00140693	0.00198643	0.000844824	0.00135477	0.000972309	0.114754	medium heterogeneity
P31937	3-hydroxyisobutyrate dehydrogenase, mitochondrial (HIBADH) (EC 1.1.1.31)	HIBADH	HIBADH	336	9	5.25208	0.00146607	0.000257465	0.0012086	0.00160774	0.000704486	0.00152354	0.00090925	0.131148	medium heterogeneity
Q6NVY1	3-hydroxyisobutyryl-CoA hydrolase, mitochondrial (EC 3.1.2.4) (3-hydroxyisobutyryl-coenzyme A hydrolase) (HIB-CoA hydrolase) (HIBYL-CoA-H)	HIBCH	HIBCH	386	11	4.92618	0.00215715	0.00120128	0.000955866	-0.000358477	0.00183553	0.00225989	0.00194162	0.166667	medium heterogeneity
Q8IV36	Protein HID1 (Down-regulated in multiple cancers 1) (HID1 domain-containing protein) (Protein hid-1 homolog)	HID1	HID1 C17orf28 DMC1	788	6	5.28475	0.00501915	0.000188094	0.00483106	0.00179167	0.0023547	0.0213783	0.0071106	0.0191257	medium heterogeneity
P49773	Histidine triad nucleotide-binding protein 1 (EC 3.-.-.-) (Adenosine 5'-monophosphoramidase) (Protein kinase C inhibitor 1) (Protein kinase C-interacting protein 1) (PKCI-1)	HINT1	HINT1 HINT PKCI1 PRKCNH1	126	4	5.64224	0.00149938	0.00106494	0.000434441	0.000461342	0.000265039	0.000861945	0.000414265	0.26776	medium heterogeneity
Q9BX68	Histidine triad nucleotide-binding protein 2, mitochondrial (HINT-2) (EC 3.-.-.-) (HINT-3) (HIT-17kDa) (PKCI-1-related HIT protein)	HINT2	HINT2	163	3	4.7727	0.00647477	0.00157879	0.00489597	0.00472905	0.00553054	0.00349305	0.00502117	0.0191257	medium heterogeneity
O75146	Huntingtin-interacting protein 1-related protein (HIP1-related protein) (Huntingtin-interacting protein 12) (HIP-12)	HIP1R	HIP1R HIP12 KIAA0655	1068	5	5.65939	0.00138729	0.000944818	0.000442468	0.000906737	1.39e-05	0.000335441	9.43e-05	0.262295	medium heterogeneity
P16401	Histone H1.5 (Histone H1a) (Histone H1b) (Histone H1s-3)	HIST1H1B	HIST1H1B H1F5	226	2	5.44846	0.0122234	0.00483289	0.00739053	0.00860819	0.00388389	0.0142575	0.00647728	0.00273224	variable in BPH and ADCA
P62805	Histone H4	HIST1H4A	HIST1H4A H4/A H4FA; HIST1H4B H4/I H4FI; HIST1H4C H4/G H4FG; HIST1H4D H4/B H4FB; HIST1H4E H4/J H4FJ; HIST1H4F H4/C H4FC; HIST1H4H H4/H H4FH; HIST1H4I H4/M H4FM; HIST1H4J H4/E H4FE; HIST1H4K H4/D H4FD; HIST1H4L H4/K H4FK; HIST2H4A H4/N H4F2 H4FN HIST2H4; HIST2H4B H4/O H4FO; HIST4H4	103	6	6.14586	0.0298108	0.00206609	0.0277447	0.0349664	0.0132294	0.0496255	0.0223284	0.00273224	variable in BPH and ADCA
P15822	Zinc finger protein 40 (Cirhin interaction protein) (CIRIP) (Gate keeper of apoptosis-activating protein) (GAAP) (Human immunodeficiency virus type I enhancer-binding protein 1) (HIV-EP1) (Major histocompatibility complex-binding protein 1) (MBP-1) (Positive regulatory domain II-binding factor 1) (PRDII-BF1)	HIVEP1	HIVEP1 ZNF40	2718	2	5.62242	0.0175442	0.0140608	0.00348341	0.000357632	0.00368093	0.0122682	0.00582774	0.0382514	medium heterogeneity
P31629	Transcription factor HIVEP2 (Human immunodeficiency virus type I enhancer-binding protein 2) (HIV-EP2) (MHC-binding protein 2) (MBP-2)	HIVEP2	HIVEP2	2446	2	5.58479	0.00294568	0.00110837	0.0018373	0.00378832	0.000651816	-0.000459282	0.000374042	0.0819672	medium heterogeneity
P19367	Hexokinase-1 (EC 2.7.1.1) (Brain form hexokinase) (Hexokinase type I) (HK I)	HK1	HK1	917	12	5.13716	0.0017734	0.000470052	0.00130334	0.00118727	0.000772738	0.00324338	0.0013904	0.128415	medium heterogeneity
P52789	Hexokinase-2 (EC 2.7.1.1) (Hexokinase type II) (HK II) (Muscle form hexokinase)	HK2	HK2	917	3	5.47032	0.0131868	0.00603016	0.00715664	0.0108783	0.00337433	0.0073386	0.0043654	0.00273224	variable in BPH
P52790	Hexokinase-3 (EC 2.7.1.1) (Hexokinase type III) (HK III)	HK3	HK3	923	2	6.1709	0.00410725	0.00160071	0.00250654	0.00100827	0.00434443	0.00148767	0.00363024	0.0546448	medium heterogeneity
Q2TB90	Putative hexokinase HKDC1 (EC 2.7.1.1) (Hexokinase domain-containing protein 1)	HKDC1	HKDC1	917	2	5.72992	0.0085585	0.0040109	0.00454761	0.00809128	0.0016679	0.00255572	0.00188986	0.0191257	medium heterogeneity
P01903	HLA class II histocompatibility antigen, DR alpha chain (MHC class II antigen DRA)	HLA-DRA	HLA-DRA HLA-DRA1	254	3	5.26424	0.0020953	0.000516341	0.00157895	0.00262995	0.000730298	0.000971945	0.00079071	0.0956284	medium heterogeneity
P50747	Biotin--protein ligase (EC 6.3.4.-) (Biotin apo-protein ligase) [Includes: Biotin--[methylmalonyl-CoA-carboxytransferase] ligase (EC 6.3.4.9); Biotin--[propionyl-CoA-carboxylase [ATP-hydrolyzing]] ligase (EC 6.3.4.10) (Holocarboxylase synthetase) (HCS); Biotin--[methylcrotonoyl-CoA-carboxylase] ligase (EC 6.3.4.11); Biotin--[acetyl-CoA-carboxylase] ligase (EC 6.3.4.15)]	HLCS	HLCS	726	3	6.24228	0.0195072	0.000925633	0.0185815	0.0321261	0.00547448	0.0172689	0.00842308	0.00273224	variable in BPH
Q14527	Helicase-like transcription factor (EC 2.3.2.27) (EC 3.6.4.-) (DNA-binding protein/plasminogen activator inhibitor 1 regulator) (HIP116) (RING finger protein 80) (RING-type E3 ubiquitin transferase HLTF) (SWI/SNF-related matrix-associated actin-dependent regulator of chromatin subfamily A member 3) (Sucrose nonfermenting protein 2-like 3)	HLTF	HLTF HIP116A RNF80 SMARCA3 SNF2L3 ZBU1	1009	3	5.45244	0.0107604	0.000897177	0.0098632	0.0138343	0.00413559	0.0151327	0.00688486	0.00273224	variable in BPH
P08397	Porphobilinogen deaminase (PBG-D) (EC 2.5.1.61) (Hydroxymethylbilane synthase) (HMBS) (Pre-uroporphyrinogen synthase)	HMBS	HMBS PBGD UPS	361	2	4.80893	0.00486807	0.00363776	0.00123031	0.00158206	0.00069132	0.00179205	0.000966502	0.128415	medium heterogeneity
P17096	High mobility group protein HMG-I/HMG-Y (HMG-I(Y)) (High mobility group AT-hook protein 1) (High mobility group protein A1) (High mobility group protein R)	HMGA1	HMGA1 HMGIY	107	3	5.24694	0.00419751	0.000955209	0.0032423	0.00641078	0.000998558	0.000468078	0.000865938	0.0409836	medium heterogeneity
P09429	High mobility group protein B1 (High mobility group protein 1) (HMG-1)	HMGB1	HMGB1 HMG1	215	5	5.6535	0.00395317	0.000692991	0.00326018	0.00622282	0.000996521	0.00116328	0.00103821	0.0409836	medium heterogeneity
P26583	High mobility group protein B2 (High mobility group protein 2) (HMG-2)	HMGB2	HMGB2 HMG2	209	3	5.55471	0.00834297	0.00123036	0.00711261	0.00298024	0.0112723	0.00703059	0.0102119	0.00273224	variable in ADCA
O15347	High mobility group protein B3 (High mobility group protein 2a) (HMG-2a) (High mobility group protein 4) (HMG-4)	HMGB3	HMGB3 HMG2A HMG4	200	3	5.3343	0.00357018	0.00125085	0.00231933	0.00230055	0.00202308	0.00326441	0.00233341	0.057377	medium heterogeneity
P35914	Hydroxymethylglutaryl-CoA lyase, mitochondrial (HL) (HMG-CoA lyase) (EC 4.1.3.4) (3-hydroxy-3-methylglutarate-CoA lyase)	HMGCL	HMGCL	325	4	4.9934	0.00345626	0.00148273	0.00197354	0.000876421	0.00215252	0.00472794	0.00279638	0.0710383	medium heterogeneity
Q01581	Hydroxymethylglutaryl-CoA synthase, cytoplasmic (HMG-CoA synthase) (EC 2.3.3.10) (3-hydroxy-3-methylglutaryl coenzyme A synthase)	HMGCS1	HMGCS1 HMGCS	520	2	5.58868	0.00148379	0.000695954	0.000787839	0.000221182	0.00142085	0.000588789	0.00121283	0.185792	medium heterogeneity
P54868	Hydroxymethylglutaryl-CoA synthase, mitochondrial (HMG-CoA synthase) (EC 2.3.3.10) (3-hydroxy-3-methylglutaryl coenzyme A synthase)	HMGCS2	HMGCS2	508	8	5.11105	0.00537005	0.000917345	0.00445271	0.00357879	0.00522393	0.00476083	0.00510815	0.0191257	medium heterogeneity
P09601	Heme oxygenase 1 (HO-1) (EC 1.14.14.18)	HMOX1	HMOX1 HO HO1	288	2	5.80071	0.010228	0.000431563	0.00979641	0.0082322	0.0123794	0.00674002	0.0109696	0.00273224	variable in BPH and ADCA
P30519	Heme oxygenase 2 (HO-2) (EC 1.14.14.18)	HMOX2	HMOX2 HO2	316	2	5.24115	0.0158942	0.0124691	0.00342512	0.0167489	-0.00786049	-0.00268941	-0.00656772	0.0409836	medium heterogeneity
Q13151	Heterogeneous nuclear ribonucleoprotein A0 (hnRNP A0)	HNRNPA0	HNRNPA0 HNRPA0	305	6	5.40161	0.00117034	0.000271577	0.000898765	0.00100125	0.000706296	0.00116871	0.000821899	0.174863	medium heterogeneity
P09651	Heterogeneous nuclear ribonucleoprotein A1 (hnRNP A1) (Helix-destabilizing protein) (Single-strand RNA-binding protein) (hnRNP core protein A1) [Cleaved into: Heterogeneous nuclear ribonucleoprotein A1, N-terminally processed]	HNRNPA1	HNRNPA1 HNRPA1	372	2	5.55589	0.0061319	0.00391707	0.00221483	0.003379	0.000476422	0.00393754	0.0013417	0.0601093	medium heterogeneity
P22626	Heterogeneous nuclear ribonucleoproteins A2/B1 (hnRNP A2/B1)	HNRNPA2B1	HNRNPA2B1 HNRPA2B1	353	17	5.79437	0.00899551	0.000402385	0.00859312	0.0101916	0.00480545	0.0151606	0.00739423	0.00273224	variable in BPH and ADCA
P51991	Heterogeneous nuclear ribonucleoprotein A3 (hnRNP A3)	HNRNPA3	HNRNPA3 HNRPA3	378	9	5.58621	0.00533149	0.000280704	0.00505079	0.0069784	0.00249447	0.00693688	0.00360507	0.0163934	medium heterogeneity
Q99729	Heterogeneous nuclear ribonucleoprotein A/B (hnRNP A/B) (APOBEC1-binding protein 1) (ABBP-1)	HNRNPAB	HNRNPAB ABBP1 HNRPAB	332	2	5.33188	0.0170545	0.00193772	0.0151167	0.0224907	0.0089686	0.0114393	0.00958626	0.00273224	variable in BPH
P07910	Heterogeneous nuclear ribonucleoproteins C1/C2 (hnRNP C1/C2)	HNRNPC	HNRNPC HNRPC	306	5	5.85194	0.0105272	0.000382427	0.0101448	0.00980469	0.00866856	0.0155938	0.0103999	0.00273224	variable in BPH and ADCA
Q14103	Heterogeneous nuclear ribonucleoprotein D0 (hnRNP D0) (AU-rich element RNA-binding protein 1)	HNRNPD	HNRNPD AUF1 HNRPD	355	11	5.28381	0.00277644	0.000330009	0.00244643	0.00389401	0.000623918	0.00357123	0.00136075	0.057377	medium heterogeneity
O14979	Heterogeneous nuclear ribonucleoprotein D-like (hnRNP D-like) (hnRNP DL) (AU-rich element RNA-binding factor) (JKT41-binding protein) (Protein laAUF1)	HNRNPDL	HNRNPDL HNRPDL JKTBP	420	9	5.27367	0.00133296	0.00084871	0.000484252	0.000402785	0.000485411	0.000725179	0.000545353	0.240437	medium heterogeneity
P52597	Heterogeneous nuclear ribonucleoprotein F (hnRNP F) (Nucleolin-like protein mcs94-1) [Cleaved into: Heterogeneous nuclear ribonucleoprotein F, N-terminally processed]	HNRNPF	HNRNPF HNRPF	415	8	5.27238	0.00462601	0.00257471	0.0020513	0.0032273	0.000955919	0.00180947	0.00116931	0.068306	medium heterogeneity
P31943	Heterogeneous nuclear ribonucleoprotein H (hnRNP H) [Cleaved into: Heterogeneous nuclear ribonucleoprotein H, N-terminally processed]	HNRNPH1	HNRNPH1 HNRPH HNRPH1	449	2	5.26421	0.00128065	0.000486904	0.000793743	0.000797535	0.000564307	0.00147067	0.000790898	0.185792	medium heterogeneity
P55795	Heterogeneous nuclear ribonucleoprotein H2 (hnRNP H2) (FTP-3) (Heterogeneous nuclear ribonucleoprotein H') (hnRNP H') [Cleaved into: Heterogeneous nuclear ribonucleoprotein H2, N-terminally processed]	HNRNPH2	HNRNPH2 FTP3 HNRPH2	449	5	5.25002	0.000735664	0.000634315	0.000101348	3.69e-05	-4.45e-05	0.000732199	0.000149658	0.448087	stable in BPH and ADCA
P31942	Heterogeneous nuclear ribonucleoprotein H3 (hnRNP H3) (Heterogeneous nuclear ribonucleoprotein 2H9) (hnRNP 2H9)	HNRNPH3	HNRNPH3 HNRPH3	346	4	5.2059	0.00184444	0.000794953	0.00104949	0.00104415	0.00103746	0.0011016	0.00105349	0.147541	medium heterogeneity
P61978	Heterogeneous nuclear ribonucleoprotein K (hnRNP K) (Transformation up-regulated nuclear protein) (TUNP)	HNRNPK	HNRNPK HNRPK	463	14	5.56661	0.00829157	0.000334468	0.0079571	0.00842049	0.00524211	0.0147119	0.00760956	0.00273224	variable in BPH and ADCA
P14866	Heterogeneous nuclear ribonucleoprotein L (hnRNP L)	HNRNPL	HNRNPL HNRPL P/OKcl.14	589	14	5.30139	0.00109622	0.000271552	0.000824667	0.00046108	0.000504069	0.00287723	0.00109736	0.18306	medium heterogeneity
Q8WVV9	Heterogeneous nuclear ribonucleoprotein L-like (hnRNPLL) (Stromal RNA-regulating factor)	HNRNPLL	HNRNPLL HNRPLL SRRF BLOCK24	542	2	5.2797	0.00198333	0.000892642	0.00109068	0.00173897	0.000893762	-0.000263413	0.000604468	0.142077	medium heterogeneity
P52272	Heterogeneous nuclear ribonucleoprotein M (hnRNP M)	HNRNPM	HNRNPM HNRPM NAGR1	730	16	5.48435	0.00404868	0.000313867	0.00373481	0.00458334	0.00195407	0.00653145	0.00309842	0.0300546	medium heterogeneity
O43390	Heterogeneous nuclear ribonucleoprotein R (hnRNP R)	HNRNPR	HNRNPR HNRPR	633	11	5.30032	0.00361007	0.000301721	0.00330834	0.00307307	0.00102442	0.0108659	0.0034848	0.0409836	medium heterogeneity
Q00839	Heterogeneous nuclear ribonucleoprotein U (hnRNP U) (GRIP120) (Nuclear p120 ribonucleoprotein) (Scaffold-attachment factor A) (SAF-A) (p120) (pp120)	HNRNPU	HNRNPU C1orf199 HNRPU SAFA U21.1	825	18	5.40658	0.00394049	0.000315436	0.00362505	0.00263424	0.00167666	0.0124427	0.00436816	0.0327869	medium heterogeneity
Q9BUJ2	Heterogeneous nuclear ribonucleoprotein U-like protein 1 (Adenovirus early region 1B-associated protein 5) (E1B-55 kDa-associated protein 5) (E1B-AP5)	HNRNPUL1	HNRNPUL1 E1BAP5 HNRPUL1	856	5	5.30245	0.0021089	0.00152612	0.000582781	0.00115011	0.000176115	0.000100777	0.000157281	0.224044	medium heterogeneity
Q1KMD3	Heterogeneous nuclear ribonucleoprotein U-like protein 2 (Scaffold-attachment factor A2) (SAF-A2)	HNRNPUL2	HNRNPUL2 HNRPUL2	747	9	5.36732	0.00195633	0.000436134	0.0015202	0.000855774	0.00190924	0.00234635	0.00201851	0.101093	medium heterogeneity
Q86YM7	Homer protein homolog 1 (Homer-1)	HOMER1	HOMER1 SYN47	354	2	5.41461	0.00539875	0.00443043	0.000968325	0.00285609	-0.000338453	-0.000774639	-0.0004475	0.166667	medium heterogeneity
P00738	Haptoglobin (Zonulin) [Cleaved into: Haptoglobin alpha chain; Haptoglobin beta chain]	HP	HP	406	8	5.53795	0.00851654	0.000637932	0.00787861	0.00970425	0.00851014	0.000507083	0.00650938	0.00273224	variable in BPH and ADCA
Q5SSJ5	Heterochromatin protein 1-binding protein 3 (Protein HP1-BP74)	HP1BP3	HP1BP3	553	5	4.90395	0.00710169	0.00296039	0.0041413	0.00752506	-0.000601259	0.00821772	0.00160349	0.0273224	medium heterogeneity
P32754	4-hydroxyphenylpyruvate dioxygenase (EC 1.13.11.27) (4-hydroxyphenylpyruvic acid oxidase) (4HPPD) (HPD) (HPPDase)	HPD	HPD PPD	393	2	5.24514	0.00573684	0.00325187	0.00248497	0.0028534	0.00257843	0.0010993	0.00220865	0.0546448	medium heterogeneity
P00492	Hypoxanthine-guanine phosphoribosyltransferase (HGPRT) (HGPRTase) (EC 2.4.2.8)	HPRT1	HPRT1 HPRT	218	2	5.41273	0.00750634	0.00194428	0.00556205	0.00573499	0.0050091	0.00670213	0.00543236	0.010929	medium heterogeneity
Q9UPZ3	Hermansky-Pudlak syndrome 5 protein (Alpha-integrin-binding protein 63) (Ruby-eye protein 2 homolog) (Ru2)	HPS5	HPS5 AIBP63 KIAA1017	1129	2	5.7439	0.00895996	0.0027134	0.00624656	0.00691306	0.00600955	0.0049581	0.00574669	0.00819672	variable in BPH and ADCA
Q86YV9	Hermansky-Pudlak syndrome 6 protein (Ruby-eye protein homolog) (Ru)	HPS6	HPS6	775	2	5.43327	0.00335417	0.000973781	0.00238039	0.00301382	0.00229426	0.000738531	0.00190533	0.057377	medium heterogeneity
P02790	Hemopexin (Beta-1B-glycoprotein)	HPX	HPX	462	11	5.71276	0.00419185	0.000365122	0.00382673	0.00578565	0.00284451	0.000896647	0.00235754	0.0300546	medium heterogeneity
P04196	Histidine-rich glycoprotein (Histidine-proline-rich glycoprotein) (HPRG)	HRG	HRG	525	4	5.25605	0.00418886	0.000589547	0.00359931	0.00253444	0.00428278	0.00474351	0.00439796	0.0355191	medium heterogeneity
Q53T59	HCLS1-binding protein 3 (HS1-binding protein 3) (HSP1BP-3)	HS1BP3	HS1BP3	392	3	5.89097	0.00375193	0.00125261	0.00249932	0.00441919	0.000868415	0.00163242	0.00105941	0.0546448	medium heterogeneity
O75506	Heat shock factor-binding protein 1 (Nasopharyngeal carcinoma-associated antigen 13) (NPC-A-13)	HSBP1	HSBP1 HSF1BP	76	3	4.80661	0.0109235	0.00191537	0.00900811	0.0163566	0.00335017	0.00393654	0.00349676	0.00273224	variable in BPH
P80365	Corticosteroid 11-beta-dehydrogenase isozyme 2 (EC 1.1.1.-) (11-beta-hydroxysteroid dehydrogenase type 2) (11-DH2) (11-beta-HSD2) (11-beta-hydroxysteroid dehydrogenase type II) (11-HSD type II) (11-beta-HSD type II) (NAD-dependent 11-beta-hydroxysteroid dehydrogenase) (11-beta-HSD) (Short chain dehydrogenase/reductase family 9C member 3)	HSD11B2	HSD11B2 HSD11K SDR9C3	405	2	4.38738	0.00772373	0.00467029	0.00305344	0.00465571	0.00265879	-0.000569468	0.00185173	0.0409836	medium heterogeneity
Q99714	3-hydroxyacyl-CoA dehydrogenase type-2 (EC 1.1.1.35) (17-beta-hydroxysteroid dehydrogenase 10) (17-beta-HSD 10) (EC 1.1.1.51) (2-methyl-3-hydroxybutyryl-CoA dehydrogenase) (MHBD) (3-hydroxy-2-methylbutyryl-CoA dehydrogenase) (EC 1.1.1.178) (3-hydroxyacyl-CoA dehydrogenase type II) (Endoplasmic reticulum-associated amyloid beta-peptide-binding protein) (Mitochondrial ribonuclease P protein 2) (Mit…	HSD17B10	HSD17B10 ERAB HADH2 MRPP2 SCHAD SDR5C1 XH98G2	261	14	5.23326	0.0020577	0.00149347	0.000564233	0.000692041	4.73e-05	0.00173166	0.000468378	0.226776	medium heterogeneity
Q8NBQ5	Estradiol 17-beta-dehydrogenase 11 (EC 1.1.1.62) (17-beta-hydroxysteroid dehydrogenase 11) (17-beta-HSD 11) (17bHSD11) (17betaHSD11) (17-beta-hydroxysteroid dehydrogenase XI) (17-beta-HSD XI) (17betaHSDXI) (Cutaneous T-cell lymphoma-associated antigen HD-CL-03) (CTCL-associated antigen HD-CL-03) (Dehydrogenase/reductase SDR family member 8) (Retinal short-chain dehydrogenase/reductase 2) (retSDR2…	HSD17B11	HSD17B11 DHRS8 PAN1B SDR16C2 PSEC0029 UNQ207/PRO233	300	2	4.64055	0.0110218	0.00177707	0.0092447	0.00503052	0.0166033	-0.000188587	0.0124053	0.00273224	variable in ADCA
Q53GQ0	Very-long-chain 3-oxoacyl-CoA reductase (EC 1.1.1.330) (17-beta-hydroxysteroid dehydrogenase 12) (17-beta-HSD 12) (3-ketoacyl-CoA reductase) (KAR) (Estradiol 17-beta-dehydrogenase 12) (EC 1.1.1.62) (Short chain dehydrogenase/reductase family 12C member 1)	HSD17B12	HSD17B12 SDR12C1	312	3	5.06267	0.00774081	0.00288177	0.00485904	-0.000963581	0.0123737	-0.000217211	0.009226	0.0191257	medium heterogeneity
P51659	Peroxisomal multifunctional enzyme type 2 (MFE-2) (17-beta-hydroxysteroid dehydrogenase 4) (17-beta-HSD 4) (D-bifunctional protein) (DBP) (Multifunctional protein 2) (MPF-2) (Short chain dehydrogenase/reductase family 8C member 1) [Cleaved into: (3R)-hydroxyacyl-CoA dehydrogenase (EC 1.1.1.n12); Enoyl-CoA hydratase 2 (EC 4.2.1.107) (EC 4.2.1.119) (3-alpha,7-alpha,12-alpha-trihydroxy-5-beta-choles…	HSD17B4	HSD17B4 EDH17B4 SDR8C1	736	21	5.23104	0.00123282	0.000378579	0.00085424	0.00036629	0.000447455	0.00353844	0.0012202	0.180328	medium heterogeneity
P56937	3-keto-steroid reductase (EC 1.1.1.270) (17-beta-hydroxysteroid dehydrogenase 7) (17-beta-HSD 7) (Estradiol 17-beta-dehydrogenase 7) (EC 1.1.1.62) (Short chain dehydrogenase/reductase family 37C member 1)	HSD17B7	HSD17B7 SDR37C1 UNQ2563/PRO6243	341	2	5.77648	0.0029654	0.00131251	0.00165289	0.0014984	0.00135442	0.0030118	0.00176876	0.0901639	medium heterogeneity
Q92506	Estradiol 17-beta-dehydrogenase 8 (EC 1.1.1.62) (17-beta-hydroxysteroid dehydrogenase 8) (17-beta-HSD 8) (3-ketoacyl-[acyl-carrier-protein] reductase alpha subunit) (KAR alpha subunit) (3-oxoacyl-[acyl-carrier-protein] reductase) (EC 1.1.1.-) (Protein Ke6) (Ke-6) (Really interesting new gene 2 protein) (Short chain dehydrogenase/reductase family 30C member 1) (Testosterone 17-beta-dehydrogenase 8…	HSD17B8	HSD17B8 FABGL HKE6 RING2 SDR30C1	261	2	6.18562	0.00647874	0.00162813	0.00485061	0.0105096	0.000537422	0.000813336	0.000606401	0.0191257	medium heterogeneity
Q6YN16	Hydroxysteroid dehydrogenase-like protein 2 (EC 1.-.-.-) (Short chain dehydrogenase/reductase family 13C member 1)	HSDL2	HSDL2 C9orf99 SDR13C1	418	3	5.1731	0.00244061	0.00122774	0.00121286	0.000838381	0.00211754	-0.00037775	0.00149372	0.128415	medium heterogeneity
P07900	Heat shock protein HSP 90-alpha (Heat shock 86 kDa) (HSP 86) (HSP86) (Lipopolysaccharide-associated protein 2) (LAP-2) (LPS-associated protein 2) (Renal carcinoma antigen NY-REN-38)	HSP90AA1	HSP90AA1 HSP90A HSPC1 HSPCA	732	14	5.57047	0.00341685	0.000127769	0.00328908	0.00373315	0.00215729	0.0053522	0.00295602	0.0409836	medium heterogeneity
P08238	Heat shock protein HSP 90-beta (HSP 90) (Heat shock 84 kDa) (HSP 84) (HSP84)	HSP90AB1	HSP90AB1 HSP90B HSPC2 HSPCB	724	6	5.436	0.00452235	0.00167096	0.00285139	0.00184454	0.00312885	0.00503957	0.00360653	0.0409836	medium heterogeneity
Q58FF6	Putative heat shock protein HSP 90-beta 4	HSP90AB4P	HSP90AB4P	505	2	5.06582	0.00314907	0.00213722	0.00101185	0.001438	0.000782645	0.000421012	0.000692237	0.155738	medium heterogeneity
P14625	Endoplasmin (94 kDa glucose-regulated protein) (GRP-94) (Heat shock protein 90 kDa beta member 1) (Tumor rejection antigen 1) (gp96 homolog)	HSP90B1	HSP90B1 GRP94 TRA1	803	35	5.61179	0.00535539	0.000147926	0.00520746	0.00398291	0.00542142	0.00823925	0.00612588	0.0136612	medium heterogeneity
O43301	Heat shock 70 kDa protein 12A	HSPA12A	HSPA12A KIAA0417	675	3	5.60004	0.00844884	0.00168054	0.0067683	0.0127859	0.00193437	0.00321727	0.00225509	0.00819672	variable in BPH
Q0VDF9	Heat shock 70 kDa protein 14 (HSP70-like protein 1) (Heat shock protein HSP60)	HSPA14	HSPA14 HSP60 HSP70L1	509	3	5.4133	0.00363111	0.00163373	0.00199738	0.00159993	0.0023476	0.00213906	0.00229547	0.0710383	medium heterogeneity
P34931	Heat shock 70 kDa protein 1-like (Heat shock 70 kDa protein 1L) (Heat shock 70 kDa protein 1-Hom) (HSP70-Hom)	HSPA1L	HSPA1L	641	3	5.98294	0.0121808	0.00412745	0.00805337	0.0142179	0.00272125	0.00555624	0.00343	0.00273224	variable in BPH
P54652	Heat shock-related 70 kDa protein 2 (Heat shock 70 kDa protein 2)	HSPA2	HSPA2	639	3	5.20667	0.00371529	0.00199509	0.00172019	0.00114865	0.00279808	0.00020117	0.00214885	0.0874317	medium heterogeneity
P34932	Heat shock 70 kDa protein 4 (HSP70RY) (Heat shock 70-related protein APG-2)	HSPA4	HSPA4 APG2	840	9	5.29685	0.00113114	0.000120858	0.00101028	0.00105974	0.00113076	0.000500432	0.000973182	0.155738	medium heterogeneity
O95757	Heat shock 70 kDa protein 4L (Heat shock 70-related protein APG-1) (Osmotic stress protein 94)	HSPA4L	HSPA4L APG1 OSP94	839	5	5.3486	0.00528525	0.00180494	0.00348031	0.00519996	0.00174743	0.00352002	0.00219058	0.0382514	medium heterogeneity
P11021	Endoplasmic reticulum chaperone BiP (EC 3.6.4.10) (78 kDa glucose-regulated protein) (GRP-78) (Binding-immunoglobulin protein) (BiP) (Heat shock protein 70 family protein 5) (HSP70 family protein 5) (Heat shock protein family A member 5) (Immunoglobulin heavy chain-binding protein)	HSPA5	HSPA5 GRP78	654	22	5.51378	0.00517815	0.000200721	0.00497743	0.00542889	0.0036502	0.00760474	0.00463883	0.0191257	medium heterogeneity
P17066	Heat shock 70 kDa protein 6 (Heat shock 70 kDa protein B')	HSPA6	HSPA6 HSP70B'	643	2	4.85911	0.00836367	0.00576936	0.00259431	0.00317062	0.00399537	-0.00333783	0.00216207	0.0519126	medium heterogeneity
P11142	Heat shock cognate 71 kDa protein (Heat shock 70 kDa protein 8) (Lipopolysaccharide-associated protein 1) (LAP-1) (LPS-associated protein 1)	HSPA8	HSPA8 HSC70 HSP73 HSPA10	646	21	5.69199	0.0046531	0.000373514	0.00427958	0.00338066	0.00332536	0.009839	0.00495377	0.0245902	medium heterogeneity
P38646	Stress-70 protein, mitochondrial (75 kDa glucose-regulated protein) (GRP-75) (Heat shock 70 kDa protein 9) (Mortalin) (MOT) (Peptide-binding protein 74) (PBP74)	HSPA9	HSPA9 GRP75 HSPA9B mt-HSP70	679	18	5.38823	0.00403123	0.000163423	0.00386781	0.00339077	0.00268727	0.00884054	0.00422558	0.0300546	medium heterogeneity
P04792	Heat shock protein beta-1 (HspB1) (28 kDa heat shock protein) (Estrogen-regulated 24 kDa protein) (Heat shock 27 kDa protein) (HSP 27) (Stress-responsive protein 27) (SRP27)	HSPB1	HSPB1 HSP27 HSP28	205	17	5.87616	0.00332094	0.000787799	0.00253314	0.00468172	0.00124382	-4.46e-05	0.00092171	0.0546448	medium heterogeneity
O14558	Heat shock protein beta-6 (HspB6) (Heat shock 20 kDa-like protein p20)	HSPB6	HSPB6	160	7	5.24029	0.0128906	0.000893853	0.0119968	0.017048	0.00572334	0.0156634	0.00820836	0.00273224	variable in BPH
Q9UBY9	Heat shock protein beta-7 (HspB7) (Cardiovascular heat shock protein) (cvHsp)	HSPB7	HSPB7 CVHSP	170	3	5.31601	0.00541651	0.0017321	0.00368441	0.00389492	0.00208143	0.00786182	0.00352652	0.0327869	medium heterogeneity
P10809	60 kDa heat shock protein, mitochondrial (EC 3.6.4.9) (60 kDa chaperonin) (Chaperonin 60) (CPN60) (Heat shock protein 60) (HSP-60) (Hsp60) (HuCHA60) (Mitochondrial matrix protein P1) (P60 lymphocyte protein)	HSPD1	HSPD1 HSP60	573	35	5.56307	0.00441364	0.000469503	0.00394414	0.00183176	0.00398105	0.0101706	0.00552843	0.0300546	medium heterogeneity
P61604	10 kDa heat shock protein, mitochondrial (Hsp10) (10 kDa chaperonin) (Chaperonin 10) (CPN10) (Early-pregnancy factor) (EPF)	HSPE1	HSPE1	102	10	5.74679	0.00962882	0.00089619	0.00873263	0.00677089	0.0101001	0.0105154	0.0102039	0.00273224	variable in BPH and ADCA
P98160	Basement membrane-specific heparan sulfate proteoglycan core protein (HSPG) (Perlecan) (PLC) [Cleaved into: Endorepellin; LG3 peptide]	HSPG2	HSPG2	4391	23	5.14003	0.0027639	0.000464068	0.00229983	0.00311161	0.00144466	0.00243002	0.001691	0.0601093	medium heterogeneity
Q92598	Heat shock protein 105 kDa (Antigen NY-CO-25) (Heat shock 110 kDa protein)	HSPH1	HSPH1 HSP105 HSP110 KIAA0201	858	5	5.1355	0.00241472	0.00110401	0.00131071	0.0012461	0.000896986	0.0027457	0.00135916	0.125683	medium heterogeneity
O43719	HIV Tat-specific factor 1 (Tat-SF1)	HTATSF1	HTATSF1	755	2	5.25998	0.00249577	0.00104128	0.0014545	0.000911847	0.00229663	0.000556043	0.00186148	0.103825	medium heterogeneity
O43464	Serine protease HTRA2, mitochondrial (EC 3.4.21.108) (High temperature requirement protein A2) (HtrA2) (Omi stress-regulated endoprotease) (Serine protease 25) (Serine proteinase OMI)	HTRA2	HTRA2 OMI PRSS25	458	3	4.69051	0.00863168	0.00475637	0.00387531	-0.00129384	0.00602257	0.012941	0.00775218	0.0300546	medium heterogeneity
P42858	Huntingtin (Huntington disease protein) (HD protein)	HTT	HTT HD IT15	3142	4	5.42694	0.00378812	0.000378428	0.0034097	0.00244962	0.00453044	0.00292769	0.00412975	0.0409836	medium heterogeneity
Q7Z6Z7	E3 ubiquitin-protein ligase HUWE1 (EC 2.3.2.26) (ARF-binding protein 1) (ARF-BP1) (HECT, UBA and WWE domain-containing protein 1) (HECT-type E3 ubiquitin transferase HUWE1) (Homologous to E6AP carboxyl terminus homologous protein 9) (HectH9) (Large structure of UREB1) (LASU1) (Mcl-1 ubiquitin ligase E3) (Mule) (Upstream regulatory element-binding protein 1) (URE-B1) (URE-binding protein 1)	HUWE1	HUWE1 KIAA0312 KIAA1578 UREB1 HSPC272	4374	11	4.98497	0.00495169	0.00155139	0.0034003	0.00813827	-0.000712678	0.00152533	-0.000153176	0.0409836	medium heterogeneity
Q9Y4L1	Hypoxia up-regulated protein 1 (150 kDa oxygen-regulated protein) (ORP-150) (170 kDa glucose-regulated protein) (GRP-170)	HYOU1	HYOU1 GRP170 ORP150	999	22	5.29233	0.000771477	0.000330969	0.000440508	0.000394104	0.00021585	0.00125369	0.000475311	0.265027	medium heterogeneity
Q2TAA2	Isoamyl acetate-hydrolyzing esterase 1 homolog (EC 3.1.-.-)	IAH1	IAH1	248	3	4.68527	0.00636335	0.00390999	0.00245335	0.00505103	-0.00105817	0.0051949	0.000505095	0.057377	medium heterogeneity
P41252	Isoleucine--tRNA ligase, cytoplasmic (EC 6.1.1.5) (Isoleucyl-tRNA synthetase) (IRS) (IleRS)	IARS	IARS	1262	9	5.03028	0.00185365	0.000630002	0.00122365	0.00115921	0.000686655	0.00302793	0.00127198	0.128415	medium heterogeneity
Q9NSE4	Isoleucine--tRNA ligase, mitochondrial (EC 6.1.1.5) (Isoleucyl-tRNA synthetase) (IleRS)	IARS2	IARS2	1012	4	4.96377	0.0149443	0.00806607	0.00687828	0.00860372	0.00476653	0.00803723	0.0055842	0.00546448	variable in BPH and ADCA
Q5T440	Putative transferase CAF17, mitochondrial (EC 2.1.-.-) (Iron-sulfur cluster assembly factor homolog)	IBA57	IBA57 C1orf69	356	3	5.54865	0.00691273	0.00190705	0.00500568	0.000314108	0.00699096	0.0131245	0.00852435	0.0191257	medium heterogeneity
Q05084	Islet cell autoantigen 1 (69 kDa islet cell autoantigen) (ICA69) (Islet cell autoantigen p69) (ICAp69) (p69)	ICA1	ICA1	483	2	5.45754	0.00454642	0.00196906	0.00257736	0.0012556	0.00332045	0.00431338	0.00356868	0.0519126	medium heterogeneity
[truncated: 2,067 more rows]
